# Supplementary material for: The HLA region in ANCA-associated vasculitis: characterisation of genetic associations in a Scandinavian patient population
Source: PubMed Central journal article supplement (PMC11002376; doi:10.1136/rmdopen-2023-004039), 2024-04-04
Supplement: rmdopen-2023-004039supp001.pdf [file rmdopen-2023-004039supp001.pdf]

Supplementary table 1. Call rates of HLA alleles per gene, using xHLA, in controls and in cases with PR3-ANCA and MPO-ANCA, respectively.

| HLA gene | Total no. of alleles | No. of called alleles | Controls             |                       | PR3-AAV              |                       | MPO-AAV              |                       | Call rate |          |         |         |
|----------|----------------------|-----------------------|----------------------|-----------------------|----------------------|-----------------------|----------------------|-----------------------|-----------|----------|---------|---------|
|          |                      |                       | Total no. of alleles | No. of called alleles | Total no. of alleles | No. of called alleles | Total no. of alleles | No. of called alleles | All       | Controls | PR3-AAV | MPO-AAV |
| A        | 2168                 | 2083                  | 1595                 | 1580                  | 411                  | 356                   | 162                  | 147                   | 96.1%     | 99.1%    | 86.6%   | 90.7%   |
| B        | 2168                 | 2134                  | 1595                 | 1580                  | 411                  | 395                   | 162                  | 159                   | 98.4%     | 99.1%    | 96.1%   | 98.1%   |
| C        | 2168                 | 2124                  | 1595                 | 1580                  | 411                  | 391                   | 162                  | 153                   | 98.0%     | 99.1%    | 95.1%   | 94.4%   |
| DPB1     | 2168                 | 2139                  | 1595                 | 1580                  | 411                  | 399                   | 162                  | 160                   | 98.7%     | 99.1%    | 97.1%   | 98.8%   |
| DQB1     | 2168                 | 2057                  | 1595                 | 1580                  | 411                  | 341                   | 162                  | 136                   | 94.9%     | 99.1%    | 83.0%   | 84.0%   |
| DRB1     | 2168                 | 2121                  | 1595                 | 1580                  | 411                  | 386                   | 162                  | 155                   | 97.8%     | 99.1%    | 93.9%   | 95.7%   |

PR3 = proteinase 3; MPO = myeloperoxidase; ANCA = anti-neutrophil cytoplasmic antibody; PR3-AAV = PR3-ANCA positive ANCA-associated vasculitis; MPO-AAV = MPO-ANCA positive AAV.

**Supplementary Table 2.** Association analysis of PR3-ANCA+ AAV patients versus controls, adjusting for sex and genetic structure (principal components 1-4).

| Variant              | position | OR   | CI_lower | CI_upper | p        | MAF  | MAF_cases | MAF_controls | Type (SNP) |
|----------------------|----------|------|----------|----------|----------|------|-----------|--------------|------------|
| xHLA_2F8H DP81_04_01 | 33043767 | 3.32 | 2.78     | 4.00     | 7.07E-08 | 0.48 | 0.42      | 0.42         | HLA(HLA)   |
| chr6_33052958_C_T    | 33052958 | 0.09 | 0.06     | 0.13     | 6.30E-35 | 0.23 | 0.04      | 0.27         | SNP        |
| chr6_33052950_T_C    | 33052950 | 0.08 | 0.05     | 0.12     | 7.29E-35 | 0.22 | 0.04      | 0.27         | SNP        |
| chr6_33052986_T_C    | 33052986 | 0.09 | 0.06     | 0.13     | 1.29E-34 | 0.23 | 0.04      | 0.28         | SNP        |
| chr6_33053455_C_T    | 33053455 | 0.09 | 0.06     | 0.13     | 1.48E-34 | 0.23 | 0.04      | 0.28         | SNP        |
| chr6_33054046_T_G    | 33054046 | 0.09 | 0.06     | 0.13     | 1.77E-34 | 0.23 | 0.04      | 0.28         | SNP        |
| chr6_33054071_G_C    | 33054071 | 0.09 | 0.06     | 0.13     | 1.90E-34 | 0.23 | 0.04      | 0.28         | SNP        |
| chr6_33053877_G_A    | 33053877 | 0.09 | 0.06     | 0.13     | 1.91E-34 | 0.23 | 0.04      | 0.28         | SNP        |
| chr6_33053887_A_G    | 33053887 | 0.09 | 0.06     | 0.13     | 2.09E-34 | 0.23 | 0.04      | 0.28         | SNP        |
| chr6_33053882_G_A    | 33053882 | 0.09 | 0.06     | 0.13     | 2.09E-34 | 0.23 | 0.04      | 0.28         | SNP        |
| chr6_33054057_G_A    | 33054057 | 0.09 | 0.06     | 0.13     | 2.18E-34 | 0.23 | 0.04      | 0.28         | SNP        |
| chr6_33053871_A_G    | 33053871 | 0.09 | 0.06     | 0.13     | 2.14E-34 | 0.23 | 0.04      | 0.28         | SNP        |
| chr6_33053890_G_A    | 33053890 | 0.09 | 0.06     | 0.13     | 2.19E-34 | 0.23 | 0.04      | 0.28         | SNP        |
| chr6_33054152_A_G    | 33054152 | 0.09 | 0.06     | 0.13     | 2.22E-34 | 0.23 | 0.04      | 0.28         | SNP        |
| chr6_33053968_T_A    | 33053968 | 0.09 | 0.06     | 0.13     | 2.29E-34 | 0.23 | 0.04      | 0.28         | SNP        |
| chr6_33053971_T_C    | 33053971 | 0.09 | 0.06     | 0.13     | 2.29E-34 | 0.23 | 0.04      | 0.28         | SNP        |
| chr6_33053728_C_T    | 33053728 | 0.09 | 0.06     | 0.13     | 2.29E-34 | 0.23 | 0.04      | 0.28         | SNP        |
| chr6_33054149_T_C    | 33054149 | 0.09 | 0.06     | 0.13     | 2.31E-34 | 0.23 | 0.04      | 0.28         | SNP        |
| chr6_33053477_G_C    | 33053477 | 0.09 | 0.06     | 0.13     | 2.34E-34 | 0.23 | 0.04      | 0.28         | SNP        |
| chr6_33053468_G_T    | 33053468 | 0.09 | 0.06     | 0.13     | 2.35E-34 | 0.23 | 0.04      | 0.28         | SNP        |
| chr6_33055009_C_A    | 33055009 | 0.09 | 0.06     | 0.13     | 2.36E-34 | 0.23 | 0.04      | 0.28         | SNP        |
| chr6_33054235_T_G    | 33054235 | 0.09 | 0.06     | 0.13     | 2.40E-34 | 0.23 | 0.04      | 0.28         | SNP        |
| chr6_33053772_G_A    | 33053772 | 0.09 | 0.06     | 0.13     | 2.40E-34 | 0.23 | 0.04      | 0.28         | SNP        |
| chr6_33053982_G_C    | 33053982 | 0.09 | 0.06     | 0.13     | 2.41E-34 | 0.23 | 0.04      | 0.28         | SNP        |
| chr6_33054353_G_A    | 33054353 | 0.09 | 0.06     | 0.13     | 2.43E-34 | 0.23 | 0.04      | 0.28         | SNP        |
| chr6_33053868_A_G    | 33053868 | 0.09 | 0.06     | 0.13     | 2.44E-34 | 0.23 | 0.04      | 0.28         | SNP        |
| chr6_33054148_C_T    | 33054148 | 0.09 | 0.06     | 0.13     | 2.45E-34 | 0.23 | 0.04      | 0.28         | SNP        |
| chr6_33054142_G_C    | 33054142 | 0.09 | 0.06     | 0.13     | 2.48E-34 | 0.23 | 0.04      | 0.28         | SNP        |
| chr6_33054656_A_C    | 33054656 | 0.09 | 0.06     | 0.13     | 2.50E-34 | 0.23 | 0.04      | 0.28         | SNP        |
| chr6_33054675_C_G    | 33054675 | 0.09 | 0.06     | 0.13     | 2.50E-34 | 0.23 | 0.04      | 0.28         | SNP        |
| chr6_33054683_A_G    | 33054683 | 0.09 | 0.06     | 0.13     | 2.50E-34 | 0.23 | 0.04      | 0.28         | SNP        |
| chr6_33054687_G_A    | 33054687 | 0.09 | 0.06     | 0.13     | 2.50E-34 | 0.23 | 0.04      | 0.28         | SNP        |
| chr6_33054091_C_T    | 33054091 | 0.09 | 0.06     | 0.13     | 2.50E-34 | 0.23 | 0.04      | 0.28         | SNP        |
| chr6_33053780_T_A    | 33053780 | 0.09 | 0.06     | 0.13     | 2.51E-34 | 0.23 | 0.04      | 0.28         | SNP        |
| chr6_33053723_T_C    | 33053723 | 0.09 | 0.06     | 0.13     | 2.51E-34 | 0.23 | 0.04      | 0.28         | SNP        |
| chr6_33054711_G_T    | 33054711 | 0.09 | 0.06     | 0.13     | 2.57E-34 | 0.23 | 0.04      | 0.28         | SNP        |
| chr6_33054721_C_T    | 33054721 | 0.09 | 0.06     | 0.13     | 2.57E-34 | 0.23 | 0.04      | 0.28         | SNP        |
| chr6_33054141_T_C    | 33054141 | 0.09 | 0.06     | 0.13     | 2.58E-34 | 0.23 | 0.04      | 0.28         | SNP        |
| chr6_33053789_A_G    | 33053789 | 0.09 | 0.06     | 0.13     | 2.61E-34 | 0.23 | 0.04      | 0.28         | SNP        |
| chr6_33054457_A_G    | 33054457 | 0.09 | 0.06     | 0.13     | 2.61E-34 | 0.23 | 0.04      | 0.28         | SNP        |
| chr6_33054579_C_T    | 33054579 | 0.09 | 0.06     | 0.13     | 2.61E-34 | 0.23 | 0.04      | 0.28         | SNP        |
| chr6_33054595_C_T    | 33054595 | 0.09 | 0.06     | 0.13     | 2.61E-34 | 0.23 | 0.04      | 0.28         | SNP        |
| chr6_33054619_G_A    | 33054619 | 0.09 | 0.06     | 0.13     | 2.61E-34 | 0.23 | 0.04      | 0.28         | SNP        |
| chr6_33054890_C_T    | 33054890 | 0.09 | 0.06     | 0.13     | 2.61E-34 | 0.23 | 0.04      | 0.28         | SNP        |
| chr6_33054342_T_A    | 33054342 | 0.09 | 0.06     | 0.13     | 2.63E-34 | 0.23 | 0.04      | 0.28         | SNP        |
| chr6_33053902_A_G    | 33053902 | 0.09 | 0.06     | 0.13     | 2.63E-34 | 0.23 | 0.04      | 0.28         | SNP        |
| chr6_33054355_A_C    | 33054355 | 0.09 | 0.06     | 0.13     | 2.64E-34 | 0.23 | 0.04      | 0.28         | SNP        |
| chr6_33054586_A_G    | 33054586 | 0.09 | 0.06     | 0.13     | 2.65E-34 | 0.23 | 0.04      | 0.28         | SNP        |
| chr6_33054155_C_T    | 33054155 | 0.09 | 0.06     | 0.13     | 2.67E-34 | 0.23 | 0.04      | 0.28         | SNP        |
| chr6_33054156_A_G    | 33054156 | 0.09 | 0.06     | 0.13     | 2.67E-34 | 0.23 | 0.04      | 0.28         | SNP        |
| chr6_33054400_T_C    | 33054400 | 0.09 | 0.06     | 0.13     | 2.67E-34 | 0.23 | 0.04      | 0.28         | SNP        |
| chr6_33054404_A_G    | 33054404 | 0.09 | 0.06     | 0.13     | 2.67E-34 | 0.23 | 0.04      | 0.28         | SNP        |
| chr6_33054410_A_C    | 33054410 | 0.09 | 0.06     | 0.13     | 2.67E-34 | 0.23 | 0.04      | 0.28         | SNP        |
| chr6_33054331_T_C    | 33054331 | 0.09 | 0.06     | 0.13     | 2.68E-34 | 0.23 | 0.04      | 0.28         | SNP        |
| chr6_33054550_G_C    | 33054550 | 0.09 | 0.06     | 0.13     | 2.68E-34 | 0.23 | 0.04      | 0.28         | SNP        |
| chr6_33054386_C_T    | 33054386 | 0.09 | 0.06     | 0.13     | 2.75E-34 | 0.23 | 0.04      | 0.28         | SNP        |
| chr6_33053906_G_T    | 33053906 | 0.09 | 0.06     | 0.13     | 2.77E-34 | 0.23 | 0.04      | 0.28         | SNP        |
| chr6_33054381_C_T    | 33054381 | 0.09 | 0.06     | 0.13     | 2.80E-34 | 0.23 | 0.04      | 0.28         | SNP        |
| chr6_33054807_A_G    | 33054807 | 0.09 | 0.06     | 0.13     | 2.86E-34 | 0.23 | 0.04      | 0.28         | SNP        |
| chr6_33054373_C_T    | 33054373 | 0.09 | 0.06     | 0.13     | 2.88E-34 | 0.23 | 0.04      | 0.28         | SNP        |
| chr6_33054325_G_C    | 33054325 | 0.09 | 0.06     | 0.13     | 2.91E-34 | 0.23 | 0.04      | 0.28         | SNP        |
| chr6_33054302_T_C    | 33054302 | 0.09 | 0.06     | 0.13     | 2.95E-34 | 0.23 | 0.04      | 0.28         | SNP        |
| chr6_33054413_T_G    | 33054413 | 0.09 | 0.06     | 0.13     | 3.04E-34 | 0.23 | 0.04      | 0.28         | SNP        |
| chr6_33054414_T_A    | 33054414 | 0.09 | 0.06     | 0.13     | 3.04E-34 | 0.23 | 0.04      | 0.28         | SNP        |
| chr6_33054231_C_T    | 33054231 | 0.09 | 0.06     | 0.13     | 3.16E-34 | 0.23 | 0.04      | 0.28         | SNP        |
| chr6_33053399_T_C    | 33053399 | 0.09 | 0.06     | 0.13     | 3.19E-34 | 0.23 | 0.04      | 0.28         | SNP        |
| chr6_33054268_C_A    | 33054268 | 0.09 | 0.06     | 0.13     | 3.20E-34 | 0.23 | 0.04      | 0.28         | SNP        |
| chr6_33047432_A_C    | 33047432 | 0.10 | 0.07     | 0.14     | 3.30E-34 | 0.23 | 0.04      | 0.28         | SNP        |
| chr6_33054280_T_C    | 33054280 | 0.09 | 0.06     | 0.13     | 3.40E-34 | 0.23 | 0.04      | 0.28         | SNP        |
| chr6_33054281_G_A    | 33054281 | 0.09 | 0.06     | 0.13     | 4.03E-34 | 0.23 | 0.04      | 0.28         | SNP        |
| chr6_33049211_C_T    | 33049211 | 0.10 | 0.07     | 0.15     | 7.80E-34 | 0.23 | 0.04      | 0.28         | SNP        |
| chr6_33055047_A_G    | 33055047 | 0.09 | 0.06     | 0.13     | 9.98E-34 | 0.23 | 0.04      | 0.28         | SNP        |
| chr6_33053167_A_C    | 33053167 | 0.09 | 0.06     | 0.13     | 1.31E-33 | 0.23 | 0.04      | 0.28         | SNP        |
| chr6_33050125_G_A    | 33050125 | 0.09 | 0.06     | 0.14     | 1.43E-33 | 0.22 | 0.04      | 0.27         | SNP        |
| chr6_33050078_A_G    | 33050078 | 0.09 | 0.06     | 0.14     | 1.48E-33 | 0.22 | 0.04      | 0.27         | SNP        |
| chr6_33050089_G_C    | 33050089 | 0.09 | 0.06     | 0.14     | 1.54E-33 | 0.22 | 0.04      | 0.27         | SNP        |
| chr6_33050107_G_A    | 33050107 | 0.09 | 0.06     | 0.14     | 1.58E-33 | 0.22 | 0.04      | 0.27         | SNP        |
| chr6_33050079_C_G    | 33050079 | 0.09 | 0.06     | 0.14     | 1.60E-33 | 0.22 | 0.04      | 0.27         | SNP        |
| chr6_33050118_C_T    | 33050118 | 0.09 | 0.06     | 0.14     | 1.85E-33 | 0.22 | 0.04      | 0.27         | SNP        |
| chr6_33050148_T_C    | 33050148 | 0.09 | 0.06     | 0.14     | 1.97E-33 | 0.22 | 0.04      | 0.27         | SNP        |
| chr6_33050168_C_A    | 33050168 | 0.10 | 0.07     | 0.14     | 2.47E-33 | 0.22 | 0.04      | 0.27         | SNP        |
| chr6_33050024_C_A    | 33050024 | 0.10 | 0.07     | 0.14     | 2.62E-33 | 0.22 | 0.04      | 0.27         | SNP        |
| chr6_33050179_A_G    | 33050179 | 0.10 | 0.07     | 0.14     | 2.69E-33 | 0.22 | 0.04      | 0.27         | SNP        |
| chr6_33050203_C_G    | 33050203 | 0.10 | 0.07     | 0.15     | 2.76E-33 | 0.22 | 0.04      | 0.27         | SNP        |
| chr6_33050196_G_C    | 33050196 | 0.10 | 0.07     | 0.15     | 2.86E-33 | 0.22 | 0.04      | 0.27         | SNP        |
| chr6_33050045_T_C    | 33050045 | 0.10 | 0.07     | 0.15     | 2.88E-33 | 0.22 | 0.04      | 0.27         | SNP        |
| chr6_33050185_C_A    | 33050185 | 0.10 | 0.07     | 0.14     | 2.99E-33 | 0.22 | 0.04      | 0.27         | SNP        |
| chr6_33050186_T_C    | 33050186 | 0.10 | 0.07     | 0.14     | 2.99E-33 | 0.22 | 0.04      | 0.27         | SNP        |
| chr6_33050179_A_G    | 33050179 | 0.10 | 0.07     | 0.14     | 3.72E-33 | 0.23 | 0.04      | 0.27         | SNP        |
| chr6_33050473_A_G    | 33050473 | 0.10 | 0.06     | 0.14     | 4.51E-33 | 0.22 | 0.04      | 0.27         | SNP        |
| chr6_33049979_A_G    | 33049979 | 0.11 | 0.07     | 0.15     | 4.70E-33 | 0.23 | 0.04      | 0.27         | SNP        |
| chr6_33049983_C_T    | 33049983 | 0.11 | 0.07     | 0.15     | 5.20E-33 | 0.23 | 0.04      | 0.27         | SNP        |
| chr6_33050499_A_G    | 33050499 | 0.10 | 0.06     | 0.14     | 5.22E-33 | 0.22 | 0.04      | 0.27         | SNP        |
| chr6_33053307_C_T    | 33053307 | 0.09 | 0.06     | 0.14     | 1.27E-32 | 0.23 | 0.04      | 0.28         | SNP        |
| chr6_33050525_T_C    | 33050525 | 0.10 | 0.07     | 0.14     | 1.40E-32 | 0.22 | 0.04      | 0.27         | SNP        |
| chr6_33050526_C_T    | 33050526 | 0.10 | 0.06     | 0.14     | 1.60E-32 | 0.22 | 0.04      | 0.27         | SNP        |
| chr6_33053270_T_A    | 33053270 | 0.08 | 0.05     | 0.12     | 1.78E-32 | 0.23 | 0.03      | 0.28         | SNP        |
| chr6_33055123_A_G    | 33055123 | 0.09 | 0.06     | 0.13     | 1.96E-32 | 0.23 | 0.04      | 0.28         | SNP        |
| chr6_33050521_G_T    | 33050521 | 0.10 | 0.07     | 0.14     | 2.16E-32 | 0.22 | 0.04      | 0.27         | SNP        |
| chr6_33053271_T_C    | 33053271 | 0.08 | 0.05     | 0.12     | 2.59E-32 | 0.23 | 0.03      | 0.28         | SNP        |
| chr6_33053252_G_A    | 33053252 | 0.08 | 0.05     | 0.12     | 3.24E-32 | 0.23 | 0.03      | 0.28         | SNP        |
| chr6_33047031_T_C    | 33047031 | 0.10 | 0.07     | 0.15     | 3.39E-32 | 0.22 | 0.04      | 0.27         | SNP        |
| chr6_33054659_A_G    | 33054659 | 0.10 | 0.07     | 0.14     | 3.49E-32 | 0.22 | 0.04      | 0.26         | SNP        |
| chr6_33053248_A_G    | 33053248 | 0.08 | 0.05     | 0.12     | 3.59E-32 | 0.23 | 0.03      | 0.28         | SNP        |
| chr6_33055079_A_G    | 33055079 | 0.10 | 0.07     | 0.15     | 2.07E-31 | 0.21 | 0.04      | 0.26         | SNP        |
| chr6_33050232_T_A    | 33050232 | 0.11 | 0.07     | 0.15     | 8.33E-31 | 0.21 | 0.04      | 0.25         | SNP        |
| chr6_33050223_G_A    | 33050223 | 0.11 | 0.08     | 0.16     | 8.55E-31 | 0.21 | 0.04      | 0.25         | SNP        |
| chr6_33048459_T_G    | 33048459 | 0.11 | 0.07     | 0.15     | 2.68E-30 | 0.19 | 0.04      | 0.23         | SNP        |
| chr6_33048461_T_A    | 33048461 | 0.11 | 0.07     | 0.15     | 3.07E-30 | 0.19 | 0.04      | 0.23         | SNP        |
| chr6_33048457_C_G    | 33048457 |      |          |          |          |      |           |              |            |

|                   |          |      |      |      |          |      |      |      |     |
|-------------------|----------|------|------|------|----------|------|------|------|-----|
| chr3_33048661_A_G | 33048661 | 0.15 | 0.09 | 0.22 | 1.15E-18 | 0.16 | 0.04 | 0.19 | SNP |
| chr3_33045255_T_C | 33045255 | 0.41 | 0.33 | 0.50 | 1.18E-18 | 0.36 | 0.20 | 0.40 | SNP |
| chr3_33095748_C_G | 33095748 | 0.39 | 0.32 | 0.48 | 2.49E-18 | 0.32 | 0.19 | 0.35 | SNP |
| chr3_33037419_G_A | 33037419 | 0.11 | 0.06 | 0.17 | 6.66E-18 | 0.12 | 0.02 | 0.14 | SNP |
| chr3_33037424_T_C | 33037424 | 0.11 | 0.06 | 0.17 | 7.02E-18 | 0.12 | 0.02 | 0.14 | SNP |
| chr3_33095516_G_A | 33095516 | 0.37 | 0.29 | 0.46 | 1.23E-17 | 0.32 | 0.18 | 0.36 | SNP |
| chr3_33037304_G_T | 33037304 | 0.11 | 0.06 | 0.18 | 1.65E-17 | 0.12 | 0.02 | 0.15 | SNP |
| chr3_33037279_A_G | 33037279 | 0.11 | 0.07 | 0.18 | 1.91E-17 | 0.12 | 0.02 | 0.15 | SNP |
| chr3_33037294_T_G | 33037294 | 0.11 | 0.06 | 0.18 | 1.98E-17 | 0.12 | 0.02 | 0.15 | SNP |
| chr3_33037187_C_G | 33037187 | 0.12 | 0.07 | 0.19 | 2.10E-17 | 0.13 | 0.02 | 0.15 | SNP |
| chr3_33033058_T_C | 33033058 | 0.11 | 0.07 | 0.18 | 2.15E-17 | 0.12 | 0.02 | 0.15 | SNP |
| chr3_33048450_A_G | 33048450 | 0.22 | 0.15 | 0.31 | 2.33E-17 | 0.18 | 0.06 | 0.21 | SNP |
| chr3_33036951_A_G | 33036951 | 0.12 | 0.07 | 0.19 | 2.38E-17 | 0.12 | 0.02 | 0.14 | SNP |
| chr3_33036959_G_A | 33036959 | 0.12 | 0.07 | 0.19 | 2.43E-17 | 0.12 | 0.02 | 0.14 | SNP |
| chr3_33036312_A_G | 33036312 | 0.12 | 0.07 | 0.19 | 2.47E-17 | 0.12 | 0.02 | 0.15 | SNP |
| chr3_33036287_T_C | 33036287 | 0.12 | 0.07 | 0.19 | 2.49E-17 | 0.12 | 0.02 | 0.15 | SNP |
| chr3_33036505_G_C | 33036505 | 0.12 | 0.07 | 0.19 | 2.75E-17 | 0.13 | 0.02 | 0.15 | SNP |
| chr3_33036286_G_A | 33036288 | 0.12 | 0.07 | 0.19 | 2.82E-17 | 0.12 | 0.02 | 0.15 | SNP |
| chr3_33036233_A_G | 33036233 | 0.12 | 0.07 | 0.19 | 2.86E-17 | 0.12 | 0.02 | 0.15 | SNP |
| chr3_33036242_T_C | 33036242 | 0.12 | 0.07 | 0.19 | 2.86E-17 | 0.12 | 0.02 | 0.15 | SNP |
| chr3_33036617_C_T | 33036617 | 0.12 | 0.07 | 0.19 | 2.91E-17 | 0.13 | 0.02 | 0.15 | SNP |
| chr3_33036300_G_T | 33036300 | 0.12 | 0.07 | 0.19 | 2.95E-17 | 0.13 | 0.02 | 0.15 | SNP |
| chr3_33036631_A_C | 33036631 | 0.12 | 0.07 | 0.19 | 2.95E-17 | 0.13 | 0.02 | 0.15 | SNP |
| chr3_33036177_A_G | 33036177 | 0.12 | 0.07 | 0.19 | 2.98E-17 | 0.12 | 0.02 | 0.15 | SNP |
| chr3_33036401_C_T | 33036401 | 0.13 | 0.08 | 0.20 | 3.01E-17 | 0.13 | 0.02 | 0.15 | SNP |
| chr3_33036210_G_C | 33036210 | 0.12 | 0.07 | 0.19 | 3.03E-17 | 0.12 | 0.02 | 0.15 | SNP |
| chr3_33033170_T_C | 33033170 | 0.12 | 0.07 | 0.19 | 3.06E-17 | 0.12 | 0.02 | 0.15 | SNP |
| chr3_33033202_C_T | 33033202 | 0.12 | 0.07 | 0.19 | 3.09E-17 | 0.12 | 0.02 | 0.15 | SNP |
| chr3_33036717_C_G | 33036717 | 0.12 | 0.07 | 0.19 | 3.22E-17 | 0.12 | 0.02 | 0.15 | SNP |
| chr3_33036394_G_A | 33036394 | 0.12 | 0.07 | 0.19 | 3.31E-17 | 0.12 | 0.02 | 0.15 | SNP |
| chr3_33033146_T_C | 33033146 | 0.12 | 0.07 | 0.19 | 3.33E-17 | 0.12 | 0.02 | 0.15 | SNP |
| chr3_33033235_G_C | 33033235 | 0.12 | 0.07 | 0.19 | 3.35E-17 | 0.13 | 0.02 | 0.15 | SNP |
| chr3_33037522_T_C | 33037522 | 0.12 | 0.07 | 0.18 | 3.44E-17 | 0.12 | 0.02 | 0.15 | SNP |
| chr3_33037142_A_G | 33037142 | 0.12 | 0.07 | 0.19 | 3.46E-17 | 0.13 | 0.02 | 0.15 | SNP |
| chr3_33037675_C_A | 33037675 | 0.12 | 0.07 | 0.18 | 3.46E-17 | 0.12 | 0.02 | 0.15 | SNP |
| chr3_33036388_C_T | 33036388 | 0.12 | 0.07 | 0.19 | 3.51E-17 | 0.12 | 0.02 | 0.15 | SNP |
| chr3_33037690_C_T | 33037690 | 0.12 | 0.07 | 0.18 | 3.57E-17 | 0.12 | 0.02 | 0.15 | SNP |
| chr3_33036853_A_C | 33036853 | 0.12 | 0.07 | 0.19 | 3.57E-17 | 0.12 | 0.02 | 0.15 | SNP |
| chr3_33033178_G_A | 33033178 | 0.12 | 0.07 | 0.19 | 3.48E-17 | 0.12 | 0.02 | 0.15 | SNP |
| chr3_33033188_C_T | 33033188 | 0.12 | 0.07 | 0.19 | 3.59E-17 | 0.12 | 0.02 | 0.15 | SNP |
| chr3_33037579_A_T | 33037579 | 0.12 | 0.07 | 0.18 | 3.61E-17 | 0.12 | 0.02 | 0.15 | SNP |
| chr3_33037580_T_G | 33037580 | 0.12 | 0.07 | 0.18 | 3.61E-17 | 0.12 | 0.02 | 0.15 | SNP |
| chr3_33036971_C_T | 33036971 | 0.12 | 0.07 | 0.19 | 3.62E-17 | 0.12 | 0.02 | 0.15 | SNP |
| chr3_33142162_C_A | 33142162 | 0.19 | 0.13 | 0.28 | 3.64E-17 | 0.13 | 0.04 | 0.16 | SNP |
| chr3_33037080_G_A | 33037080 | 0.12 | 0.07 | 0.19 | 3.66E-17 | 0.12 | 0.02 | 0.15 | SNP |
| chr3_33037082_A_G | 33037082 | 0.12 | 0.07 | 0.19 | 3.66E-17 | 0.12 | 0.02 | 0.15 | SNP |
| chr3_33033177_G_A | 33033177 | 0.12 | 0.07 | 0.19 | 3.68E-17 | 0.12 | 0.02 | 0.15 | SNP |
| chr3_33048602_C_A | 33048602 | 0.38 | 0.31 | 0.48 | 3.72E-17 | 0.37 | 0.21 | 0.40 | SNP |
| chr3_33036999_T_C | 33036999 | 0.12 | 0.07 | 0.19 | 3.79E-17 | 0.12 | 0.02 | 0.15 | SNP |
| chr3_33036708_C_T | 33036708 | 0.12 | 0.07 | 0.19 | 3.88E-17 | 0.12 | 0.02 | 0.15 | SNP |
| chr3_33036709_G_A | 33036709 | 0.12 | 0.07 | 0.19 | 3.88E-17 | 0.12 | 0.02 | 0.15 | SNP |
| chr3_33037104_C_T | 33037104 | 0.12 | 0.07 | 0.19 | 3.95E-17 | 0.12 | 0.02 | 0.15 | SNP |
| chr3_33036132_A_G | 33036132 | 0.12 | 0.07 | 0.19 | 4.11E-17 | 0.12 | 0.02 | 0.15 | SNP |
| chr3_33036133_G_A | 33036133 | 0.12 | 0.07 | 0.19 | 4.11E-17 | 0.12 | 0.02 | 0.15 | SNP |
| chr3_33032822_G_A | 33032822 | 0.12 | 0.07 | 0.19 | 4.14E-17 | 0.12 | 0.02 | 0.15 | SNP |
| chr3_33032855_A_C | 33032855 | 0.12 | 0.07 | 0.19 | 4.48E-17 | 0.12 | 0.02 | 0.15 | SNP |
| chr3_33040715_G_A | 33040715 | 0.10 | 0.06 | 0.17 | 4.70E-17 | 0.12 | 0.02 | 0.15 | SNP |
| chr3_33040736_T_C | 33040736 | 0.10 | 0.06 | 0.17 | 4.75E-17 | 0.12 | 0.02 | 0.15 | SNP |
| chr3_33040596_A_G | 33040596 | 0.12 | 0.07 | 0.19 | 4.91E-17 | 0.12 | 0.02 | 0.15 | SNP |
| chr3_33040744_G_C | 33040744 | 0.12 | 0.07 | 0.19 | 4.92E-17 | 0.12 | 0.02 | 0.15 | SNP |
| chr3_33040781_A_G | 33040781 | 0.12 | 0.07 | 0.19 | 4.95E-17 | 0.12 | 0.02 | 0.15 | SNP |
| chr3_33040798_T_C | 33040798 | 0.12 | 0.07 | 0.19 | 4.95E-17 | 0.12 | 0.02 | 0.15 | SNP |
| chr3_33040835_A_G | 33040835 | 0.12 | 0.07 | 0.19 | 4.95E-17 | 0.12 | 0.02 | 0.15 | SNP |
| chr3_33040877_T_C | 33040877 | 0.12 | 0.07 | 0.19 | 4.95E-17 | 0.12 | 0.02 | 0.15 | SNP |
| chr3_33041034_A_G | 33041034 | 0.12 | 0.07 | 0.19 | 4.95E-17 | 0.12 | 0.02 | 0.15 | SNP |
| chr3_33041226_C_T | 33041226 | 0.12 | 0.07 | 0.19 | 4.95E-17 | 0.12 | 0.02 | 0.15 | SNP |
| chr3_33038606_C_T | 33038606 | 0.12 | 0.07 | 0.19 | 4.95E-17 | 0.12 | 0.02 | 0.15 | SNP |
| chr3_33039980_A_G | 33039980 | 0.12 | 0.07 | 0.19 | 5.08E-17 | 0.12 | 0.02 | 0.15 | SNP |
| chr3_33043930_A_G | 33043930 | 0.12 | 0.07 | 0.19 | 5.39E-17 | 0.12 | 0.02 | 0.15 | SNP |
| chr3_33032661_T_A | 33032661 | 0.12 | 0.07 | 0.19 | 5.51E-17 | 0.12 | 0.02 | 0.15 | SNP |
| chr3_33036085_C_G | 33036085 | 0.12 | 0.07 | 0.20 | 5.56E-17 | 0.12 | 0.02 | 0.15 | SNP |
| chr3_33039405_C_G | 33039405 | 0.11 | 0.06 | 0.18 | 5.65E-17 | 0.12 | 0.02 | 0.15 | SNP |
| chr3_33038116_T_G | 33038116 | 0.12 | 0.07 | 0.20 | 5.84E-17 | 0.12 | 0.02 | 0.15 | SNP |
| chr3_33039837_G_A | 33039837 | 0.12 | 0.07 | 0.19 | 5.95E-17 | 0.12 | 0.02 | 0.15 | SNP |
| chr3_33039767_A_G | 33039767 | 0.12 | 0.07 | 0.19 | 6.03E-17 | 0.12 | 0.02 | 0.15 | SNP |
| chr3_33039484_A_G | 33039484 | 0.10 | 0.06 | 0.17 | 6.04E-17 | 0.12 | 0.02 | 0.15 | SNP |
| chr3_33037768_G_C | 33037768 | 0.12 | 0.07 | 0.19 | 6.07E-17 | 0.12 | 0.02 | 0.15 | SNP |
| chr3_33041176_C_T | 33041176 | 0.11 | 0.06 | 0.18 | 6.12E-17 | 0.12 | 0.02 | 0.15 | SNP |
| chr3_33033287_G_C | 33033287 | 0.12 | 0.07 | 0.20 | 6.29E-17 | 0.12 | 0.02 | 0.15 | SNP |
| chr3_33039896_T_C | 33039896 | 0.12 | 0.07 | 0.20 | 6.52E-17 | 0.12 | 0.02 | 0.15 | SNP |
| chr3_33033267_G_A | 33033267 | 0.12 | 0.07 | 0.20 | 7.04E-17 | 0.12 | 0.02 | 0.15 | SNP |
| chr3_33039719_A_G | 33039719 | 0.12 | 0.07 | 0.19 | 7.08E-17 | 0.12 | 0.02 | 0.15 | SNP |
| chr3_33039503_C_T | 33039503 | 0.10 | 0.06 | 0.17 | 7.10E-17 | 0.12 | 0.02 | 0.15 | SNP |
| chr3_33039295_T_A | 33039295 | 0.12 | 0.07 | 0.19 | 7.62E-17 | 0.12 | 0.02 | 0.15 | SNP |
| chr3_33039729_T_G | 33039729 | 0.12 | 0.07 | 0.19 | 8.21E-17 | 0.12 | 0.02 | 0.15 | SNP |
| chr3_33041186_G_A | 33041186 | 0.11 | 0.06 | 0.18 | 1.13E-16 | 0.12 | 0.02 | 0.15 | SNP |
| chr3_33141161_G_A | 33141161 | 0.18 | 0.15 | 0.24 | 1.38E-16 | 0.35 | 0.50 | 0.32 | SNP |
| chr3_33033351_G_T | 33033351 | 0.12 | 0.07 | 0.19 | 2.71E-16 | 0.13 | 0.02 | 0.15 | SNP |
| chr3_33044257_T_C | 33044257 | 0.12 | 0.07 | 0.20 | 3.74E-16 | 0.12 | 0.02 | 0.14 | SNP |
| chr3_33158189_C_A | 33158189 | 2.06 | 1.73 | 2.46 | 4.31E-16 | 0.36 | 0.50 | 0.32 | SNP |
| chr3_33033357_C_G | 33033357 | 0.12 | 0.07 | 0.19 | 4.84E-16 | 0.12 | 0.02 | 0.15 | SNP |
| chr3_33145710_G_A | 33145710 | 2.03 | 1.71 | 2.41 | 5.18E-16 | 0.35 | 0.49 | 0.32 | SNP |
| chr3_33141280_G_A | 33141280 | 0.20 | 0.13 | 0.29 | 5.94E-16 | 0.14 | 0.04 | 0.16 | SNP |
| chr3_33154556_G_A | 33154556 | 0.19 | 0.12 | 0.28 | 6.76E-16 | 0.12 | 0.03 | 0.15 | SNP |
| chr3_33037866_A_G | 33037866 | 0.12 | 0.07 | 0.20 | 7.60E-16 | 0.12 | 0.02 | 0.14 | SNP |
| chr3_33146053_C_G | 33146053 | 0.19 | 0.12 | 0.28 | 7.76E-16 | 0.12 | 0.03 | 0.15 | SNP |
| chr3_33148878_C_T | 33148878 | 0.19 | 0.13 | 0.28 | 8.10E-16 | 0.12 | 0.03 | 0.15 | SNP |
| chr3_33037865_C_G | 33037865 | 0.13 | 0.07 | 0.20 | 9.04E-16 | 0.12 | 0.02 | 0.14 | SNP |
| chr3_33140983_G_A | 33140983 | 2.05 | 1.72 | 2.44 | 9.86E-16 | 0.36 | 0.49 | 0.32 | SNP |
| chr3_33137403_T_C | 33137403 | 2.02 | 1.70 | 2.40 | 1.12E-15 | 0.36 | 0.50 | 0.32 | SNP |
| chr3_33142153_G_T | 33142153 | 2.01 | 1.69 | 2.39 | 1.53E-15 | 0.32 | 0.50 | 0.33 | SNP |
| chr3_33048628_A_C | 33048628 | 0.15 | 0.09 | 0.23 | 2.78E-15 | 0.13 | 0.03 | 0.15 | SNP |
| chr3_33095762_G_A | 33095762 | 0.12 | 0.07 | 0.20 | 3.68E-15 | 0.10 | 0.02 | 0.12 | SNP |
| chr3_33048606_G_C | 33048606 | 0.16 | 0.10 | 0.24 | 4.35E-15 | 0.12 | 0.03 | 0.14 | SNP |
| chr3_33135392_G_A | 33135392 | 2.20 | 1.81 | 2.69 | 5.28E-15 | 0.38 | 0.52 | 0.34 | SNP |
| chr3_33139475_G_T | 33139475 | 2.03 | 1.70 | 2.42 | 5.58E-15 | 0.36 | 0.49 | 0.32 | SNP |
| chr3_33036003_G_C | 33036003 | 0.12 | 0.07 | 0.20 | 5.72E-15 | 0.11 | 0.02 | 0.13 | SNP |
| chr3_33162215_C_G | 33162215 | 1.97 | 1.67 | 2.34 | 8.92E-15 | 0.26 | 0.49 | 0.33 | SNP |
| chr3_33037878_G_A | 33037878 | 0.13 | 0.07 | 0.21 | 6.89E-15 | 0.12 | 0.02 | 0.14 | SNP |
| chr3_33035986_T_C | 33035986 | 0.12 | 0.07 | 0.20 | 7.11E-15 | 0.11 | 0.02 | 0.13 | SNP |
| chr3_33143136_G_A | 33143136 | 1.99 | 1.12 | 0.28 |          |      |      |      |     |

|                     |          |      |      |      |          |      |      |      |           |
|---------------------|----------|------|------|------|----------|------|------|------|-----------|
| chr6_33036290_G_A   | 33036290 | 1.93 | 1.59 | 2.34 | 2.85E-11 | 0.18 | 0.27 | 0.16 | SNP       |
| chr6_33045346_G_A   | 33045346 | 0.14 | 0.08 | 0.25 | 5.04E-11 | 0.08 | 0.02 | 0.09 | SNP       |
| chr6_33045147_A_T   | 33045147 | 0.49 | 0.39 | 0.61 | 9.52E-11 | 0.30 | 0.18 | 0.33 | SNP       |
| chr6_33045500_T_C   | 33045500 | 0.13 | 0.07 | 0.23 | 1.28E-10 | 0.08 | 0.01 | 0.09 | SNP       |
| chr6_33045539_T_A   | 33045539 | 0.11 | 0.05 | 0.21 | 2.40E-10 | 0.07 | 0.01 | 0.09 | SNP       |
| chr6_33139328_C_T   | 33139328 | 0.56 | 0.47 | 0.67 | 3.20E-10 | 0.43 | 0.33 | 0.46 | SNP       |
| chr6_33049726_G_T   | 33049726 | 0.11 | 0.05 | 0.21 | 5.50E-10 | 0.07 | 0.01 | 0.08 | SNP       |
| chr6_33049727_A_T   | 33049727 | 0.11 | 0.05 | 0.21 | 5.50E-10 | 0.07 | 0.01 | 0.08 | SNP       |
| chr6_33047868_C_A   | 33047868 | 0.16 | 0.09 | 0.28 | 1.06E-09 | 0.07 | 0.02 | 0.08 | SNP       |
| chr6_33134392_A_C   | 33134392 | 1.67 | 1.41 | 1.98 | 3.82E-09 | 0.40 | 0.50 | 0.38 | SNP       |
| chr6_33132931_T_C   | 33132931 | 1.80 | 1.48 | 2.21 | 6.11E-09 | 0.42 | 0.52 | 0.39 | SNP       |
| chr6_33045320_C_G   | 33045320 | 0.37 | 0.26 | 0.63 | 7.75E-09 | 0.22 | 0.05 | 0.13 | SNP       |
| chr6_33037199_G_C   | 33037199 | 0.37 | 0.26 | 0.51 | 9.31E-09 | 0.12 | 0.05 | 0.13 | SNP       |
| chr6_33032851_T_C   | 33032851 | 0.37 | 0.26 | 0.51 | 9.43E-09 | 0.12 | 0.05 | 0.13 | SNP       |
| chr6_33134102_C_T   | 33134102 | 1.65 | 1.39 | 1.96 | 1.01E-08 | 0.41 | 0.51 | 0.38 | SNP       |
| chr6_33033274_C_T   | 33033274 | 0.37 | 0.26 | 0.52 | 1.39E-08 | 0.12 | 0.05 | 0.13 | SNP       |
| chr6_33136575_T_C   | 33136575 | 1.63 | 1.38 | 1.93 | 1.45E-08 | 0.44 | 0.53 | 0.41 | SNP       |
| chr6_33041734_T_C   | 33041734 | 0.37 | 0.25 | 0.51 | 1.73E-08 | 0.11 | 0.05 | 0.13 | SNP       |
| chr6_33131734_G_A   | 33131734 | 1.77 | 1.45 | 2.17 | 2.52E-08 | 0.53 | 0.52 | 0.39 | SNP       |
| chr6_33096003_G_C   | 33096003 | 0.58 | 0.48 | 0.70 | 2.66E-08 | 0.43 | 0.34 | 0.45 | SNP       |
| HLA_2Fhd_DPB1_03_01 | 33043767 | 0.23 | 0.13 | 0.37 | 4.11E-08 | 0.06 | 0.02 | 0.08 | HLA (HLA) |
| chr6_33045902_T_A   | 33045902 | 0.17 | 0.09 | 0.37 | 5.15E-08 | 0.06 | 0.01 | 0.07 | SNP       |
| chr6_33050178_C_T   | 33050178 | 0.17 | 0.09 | 0.31 | 5.15E-08 | 0.06 | 0.01 | 0.07 | SNP       |
| chr6_33048354_A_T   | 33048354 | 0.15 | 0.07 | 0.28 | 6.92E-08 | 0.05 | 0.01 | 0.06 | SNP       |
| chr6_33047173_T_C   | 33047173 | 0.15 | 0.07 | 0.28 | 7.25E-08 | 0.05 | 0.01 | 0.06 | SNP       |
| chr6_33078581_C_A   | 33078581 | 0.24 | 0.14 | 0.44 | 1.13E-07 | 0.06 | 0.02 | 0.07 | SNP       |
| chr6_33096009_A_C   | 33096009 | 0.59 | 0.49 | 0.72 | 1.31E-07 | 0.42 | 0.34 | 0.44 | SNP       |
| chr6_33137727_T_C   | 33137727 | 1.53 | 1.30 | 1.81 | 6.42E-07 | 0.42 | 0.51 | 0.40 | SNP       |
| chr6_33123265_T_C   | 33123265 | 0.14 | 0.06 | 0.28 | 1.61E-07 | 0.05 | 0.01 | 0.06 | SNP       |
| chr6_32555317_C_T   | 32555317 | 0.40 | 0.27 | 0.57 | 9.54E-07 | 0.09 | 0.05 | 0.10 | SNP       |
| chr6_33160906_G_T   | 33160906 | 0.16 | 0.07 | 0.31 | 1.18E-06 | 0.05 | 0.01 | 0.06 | SNP       |
| chr6_33276019_G_T   | 33276019 | 0.44 | 0.31 | 0.61 | 1.55E-06 | 0.10 | 0.05 | 0.11 | SNP       |
| chr6_33078626_T_C   | 33078626 | 0.17 | 0.07 | 0.33 | 3.32E-06 | 0.05 | 0.01 | 0.06 | SNP       |
| chr6_33239869_C_T   | 33239869 | 1.90 | 1.45 | 2.49 | 3.12E-06 | 0.09 | 0.13 | 0.08 | SNP       |
| chr6_33039804_C_T   | 33039804 | 1.55 | 1.29 | 1.86 | 3.40E-06 | 0.21 | 0.28 | 0.20 | SNP       |
| chr6_33045272_C_A   | 33045272 | 0.58 | 0.47 | 0.74 | 3.47E-06 | 0.21 | 0.15 | 0.25 | SNP       |
| HLA_2Fhd_DPB1_02_01 | 33043767 | 0.46 | 0.23 | 0.63 | 4.03E-06 | 0.11 | 0.06 | 0.12 | HLA (HLA) |
| chr6_33132338_A_G   | 33132338 | 1.57 | 1.30 | 1.91 | 4.29E-06 | 0.41 | 0.50 | 0.39 | SNP       |
| chr6_33041091_G_T   | 33041091 | 0.17 | 0.08 | 0.33 | 5.84E-06 | 0.04 | 0.02 | 0.03 | SNP       |
| chr6_33044795_C_T   | 33044795 | 2.31 | 1.60 | 3.32 | 7.12E-06 | 0.04 | 0.08 | 0.03 | SNP       |
| chr6_32412809_T_A   | 32412809 | 0.51 | 0.38 | 0.68 | 7.56E-06 | 0.22 | 0.17 | 0.23 | SNP       |
| chr6_32409060_G_A   | 32409060 | 0.50 | 0.37 | 0.67 | 7.82E-06 | 0.22 | 0.17 | 0.23 | SNP       |
| chr6_32412592_G_T   | 32412592 | 0.51 | 0.38 | 0.68 | 8.45E-06 | 0.22 | 0.17 | 0.23 | SNP       |
| chr6_32632777_C_T   | 32632777 | 0.47 | 0.34 | 0.65 | 7.71E-06 | 0.14 | 0.08 | 0.15 | SNP       |
| chr6_33384473_C_T   | 33384473 | 2.01 | 1.48 | 2.73 | 7.99E-06 | 0.06 | 0.11 | 0.05 | SNP       |
| chr6_33095584_G_T   | 33095584 | 1.74 | 1.36 | 2.11 | 8.09E-06 | 0.11 | 0.16 | 0.10 | SNP       |
| chr6_32187202_C_T   | 32187202 | 1.61 | 1.31 | 1.99 | 8.20E-06 | 0.43 | 0.49 | 0.42 | SNP       |
| chr6_32406611_C_A   | 32406611 | 0.50 | 0.37 | 0.68 | 8.35E-06 | 0.22 | 0.17 | 0.23 | SNP       |
| chr6_32623509_T_C   | 32623509 | 0.22 | 0.10 | 0.41 | 8.46E-06 | 0.04 | 0.01 | 0.05 | SNP       |
| chr6_32411307_C_T   | 32411307 | 0.51 | 0.38 | 0.68 | 8.62E-06 | 0.22 | 0.17 | 0.23 | SNP       |
| chr6_32412566_T_A   | 32412566 | 0.51 | 0.38 | 0.68 | 8.62E-06 | 0.22 | 0.17 | 0.23 | SNP       |
| chr6_32408842_A_G   | 32408842 | 0.51 | 0.37 | 0.68 | 9.59E-06 | 0.22 | 0.17 | 0.23 | SNP       |
| chr6_33048195_C_T   | 33048195 | 0.21 | 0.15 | 0.44 | 1.15E-05 | 0.04 | 0.08 | 0.03 | SNP       |
| HLA_2Fhd_C_07_01    | 31236526 | 2.02 | 1.48 | 2.76 | 1.01E-05 | 0.15 | 0.17 | 0.14 | HLA (HLA) |
| chr6_32411376_T_C   | 32411376 | 0.51 | 0.38 | 0.68 | 1.03E-05 | 0.22 | 0.17 | 0.23 | SNP       |
| chr6_32410215_T_C   | 32410215 | 0.51 | 0.38 | 0.68 | 1.10E-05 | 0.22 | 0.17 | 0.23 | SNP       |
| chr6_32410210_T_C   | 32410210 | 0.51 | 0.38 | 0.69 | 1.24E-05 | 0.22 | 0.17 | 0.23 | SNP       |
| chr6_32973263_T_A   | 32973263 | 1.43 | 1.22 | 1.69 | 1.71E-05 | 0.46 | 0.52 | 0.44 | SNP       |
| chr6_32609216_T_G   | 32609216 | 0.61 | 0.48 | 0.76 | 1.85E-05 | 0.50 | 0.42 | 0.52 | SNP       |
| chr6_33190390_T_C   | 33190390 | 1.61 | 1.29 | 2.01 | 1.97E-05 | 0.47 | 0.43 | 0.32 | SNP       |
| chr6_33095865_C_T   | 33095865 | 1.68 | 1.32 | 2.13 | 2.38E-05 | 0.11 | 0.15 | 0.10 | SNP       |
| chr6_33235505_G_A   | 33235505 | 1.76 | 1.35 | 2.28 | 2.44E-05 | 0.21 | 0.24 | 0.21 | SNP       |
| chr6_33260207_T_C   | 33260207 | 1.62 | 1.49 | 2.17 | 2.69E-05 | 0.50 | 0.42 | 0.52 | SNP       |
| chr6_33250900_T_C   | 33250900 | 1.69 | 1.32 | 2.17 | 2.75E-05 | 0.37 | 0.41 | 0.36 | SNP       |
| chr6_33235869_T_C   | 33235869 | 1.73 | 1.34 | 2.25 | 3.34E-05 | 0.22 | 0.24 | 0.21 | SNP       |
| chr6_32628953_G_T   | 32628953 | 0.62 | 0.49 | 0.78 | 3.76E-05 | 0.48 | 0.41 | 0.50 | SNP       |
| chr6_32601522_A_G   | 32601522 | 1.70 | 1.32 | 2.20 | 4.35E-05 | 0.44 | 0.39 | 0.23 | SNP       |
| chr6_32610769_C_A   | 32610769 | 0.61 | 0.48 | 0.77 | 4.39E-05 | 0.33 | 0.28 | 0.34 | SNP       |
| chr6_33647936_C_T   | 33647936 | 0.21 | 0.09 | 0.42 | 4.92E-05 | 0.04 | 0.01 | 0.05 | SNP       |
| chr6_32408917_C_T   | 32408917 | 0.15 | 0.06 | 0.44 | 5.46E-05 | 0.03 | 0.03 | 0.25 | SNP       |
| chr6_32631029_T_C   | 32631029 | 0.36 | 0.21 | 0.58 | 5.53E-05 | 0.06 | 0.03 | 0.07 | SNP       |
| chr6_32611968_T_C   | 32611968 | 0.62 | 0.49 | 0.78 | 6.03E-05 | 0.47 | 0.40 | 0.49 | SNP       |
| HLA_2Fhd_DPB1_13_02 | 32545655 | 0.36 | 0.21 | 0.57 | 6.33E-05 | 0.05 | 0.02 | 0.06 | HLA (HLA) |
| chr6_33049881_G_A   | 33049881 | 0.54 | 0.40 | 0.73 | 6.78E-05 | 0.11 | 0.07 | 0.12 | SNP       |
| chr6_32973303_T_C   | 32973303 | 0.50 | 0.35 | 0.70 | 7.27E-05 | 0.10 | 0.06 | 0.11 | SNP       |
| chr6_32556491_A_G   | 32556491 | 0.47 | 0.33 | 0.68 | 7.64E-05 | 0.09 | 0.07 | 0.10 | SNP       |
| chr6_32559709_C_T   | 32559709 | 0.46 | 0.33 | 0.61 | 8.67E-05 | 0.44 | 0.38 | 0.46 | SNP       |
| chr6_32610704_C_T   | 32610704 | 0.62 | 0.48 | 0.78 | 7.98E-05 | 0.32 | 0.28 | 0.34 | SNP       |
| chr6_32628967_T_C   | 32628967 | 0.64 | 0.51 | 0.80 | 8.98E-05 | 0.49 | 0.41 | 0.51 | SNP       |
| chr6_32606701_A_G   | 32606701 | 0.62 | 0.48 | 0.79 | 9.00E-05 | 0.17 | 0.12 | 0.18 | SNP       |
| chr6_32438696_T_G   | 32438696 | 0.39 | 0.23 | 0.61 | 0.000122 | 0.05 | 0.03 | 0.06 | SNP       |
| chr6_31112737_C_A   | 31112737 | 1.82 | 1.34 | 2.47 | 0.000126 | 0.20 | 0.23 | 0.19 | SNP       |
| chr6_32976909_C_A   | 32976909 | 0.72 | 0.61 | 0.85 | 0.000126 | 0.48 | 0.43 | 0.49 | SNP       |
| chr6_32628921_C_T   | 32628921 | 0.65 | 0.52 | 0.81 | 0.000133 | 0.44 | 0.37 | 0.46 | SNP       |
| chr6_32408735_A_C   | 32408735 | 0.65 | 0.52 | 0.81 | 0.000135 | 0.33 | 0.26 | 0.35 | SNP       |
| chr6_32192436_A_G   | 32192436 | 0.44 | 0.28 | 0.66 | 0.000137 | 0.06 | 0.03 | 0.07 | SNP       |
| chr6_32611723_T_C   | 32611723 | 1.71 | 1.24 | 2.19 | 0.000137 | 0.47 | 0.40 | 0.49 | SNP       |
| chr6_32608880_G_A   | 32608880 | 1.56 | 1.24 | 1.95 | 0.000141 | 0.33 | 0.40 | 0.31 | SNP       |
| chr6_32603277_G_T   | 32603277 | 0.40 | 0.24 | 0.63 | 0.000145 | 0.05 | 0.03 | 0.06 | SNP       |
| chr6_32609009_T_C   | 32609009 | 0.40 | 0.24 | 0.63 | 0.000147 | 0.05 | 0.03 | 0.06 | SNP       |
| chr6_32606376_T_C   | 32606376 | 0.39 | 0.24 | 0.62 | 0.000152 | 0.02 | 0.06 | 0.06 | SNP       |
| chr6_31243828_A_G   | 31243828 | 0.67 | 0.54 | 0.82 | 0.000155 | 0.32 | 0.28 | 0.33 | SNP       |
| chr6_32606682_C_G   | 32606682 | 0.40 | 0.24 | 0.63 | 0.000158 | 0.05 | 0.03 | 0.06 | SNP       |
| chr6_32609047_C_T   | 32609047 | 0.40 | 0.24 | 0.63 | 0.000160 | 0.05 | 0.03 | 0.06 | SNP       |
| chr6_32603896_T_C   | 32603896 | 0.40 | 0.24 | 0.63 | 0.000160 | 0.05 | 0.03 | 0.06 | SNP       |
| chr6_32604166_A_G   | 32604166 | 0.40 | 0.24 | 0.63 | 0.000161 | 0.05 | 0.03 | 0.06 | SNP       |
| chr6_32606691_T_C   | 32606691 | 0.40 | 0.24 | 0.63 | 0.000162 | 0.05 | 0.03 | 0.06 | SNP       |
| chr6_32441129_G_A   | 32441129 | 0.40 | 0.24 | 0.63 | 0.000162 | 0.05 | 0.03 | 0.06 | SNP       |
| chr6_32188383_T_C   | 32188383 | 1.46 | 1.20 | 1.78 | 0.000167 | 0.42 | 0.48 | 0.41 | SNP       |
| chr6_32608435_T_C   | 32608435 | 0.40 | 0.24 | 0.63 | 0.000171 | 0.05 | 0.03 | 0.06 | SNP       |
| chr6_32441046_G_A   | 32441046 | 0.40 | 0.24 | 0.63 | 0.000172 | 0.05 | 0.03 | 0.06 | SNP       |
| chr6_32628606_C_A   | 32628606 | 0.40 | 0.24 | 0.63 | 0.000180 | 0.05 | 0.03 | 0.06 | SNP       |
| chr6_32553418_T_G   | 32553418 | 0.66 | 0.53 | 0.82 | 0.000181 | 0.41 | 0.35 | 0.42 | SNP       |
| chr6_33010947_A_G   | 33010947 | 1.62 | 1.26 | 2.16 | 0.000185 | 0.06 | 0.03 | 0.06 | SNP       |
| chr6_32501459_T_C   | 32501459 | 0.68 | 0.55 | 0.83 | 0.000192 | 0.39 | 0.33 | 0.41 | SNP       |
| chr6_31248382_C_T   | 31248382 | 0.51 | 0.36 | 0.72 | 0.000193 | 0.10 | 0.06 | 0.11 | SNP       |
| chr6_32407302_A_G   | 32407302 | 0.65 | 0.52 | 0.81 | 0.000202 | 0.33 | 0.26 | 0.34 | SNP       |
| chr6_32442703_G_A   | 32442703 | 0.59 | 0.23 | 0.63 | 0.000209 | 0.05 | 0.02 | 0.06 | SNP       |
| chr6_32972903_G_A   | 32972903 | 1.49 | 1.21 | 1.84 | 0.000209 | 0.14 | 0.19 | 0.13 | SNP       |
| chr6_32636040_C_T   | 32636040 | 0.63 | 0.49 | 0.80 | 0.000217 | 0.31 | 0.26 | 0.32 | SNP       |
| chr6_32917042_A_C   | 32917042 | 1.11 | 1.31 | 2.48 | 0.000223 | 0.06 |      |      |           |

|                     |          |      |      |      |          |      |      |      |           |
|---------------------|----------|------|------|------|----------|------|------|------|-----------|
| chr6_32500957_A_T   | 32500957 | 0.54 | 0.39 | 0.70 | 0.000395 | 0.19 | 0.15 | 0.30 | SNP       |
| chr6_29855331_G_A   | 29855331 | 1.49 | 1.19 | 1.86 | 0.000397 | 0.19 | 0.22 | 0.19 | SNP       |
| chr6_32407440_T_C   | 32407440 | 0.67 | 0.53 | 0.83 | 0.000407 | 0.32 | 0.26 | 0.34 | SNP       |
| chr6_32631039_G_A   | 32631039 | 0.63 | 0.49 | 0.81 | 0.000408 | 0.36 | 0.31 | 0.38 | SNP       |
| chr6_32782018_C_T   | 32782018 | 0.76 | 0.59 | 1.06 | 0.000410 | 0.10 | 0.06 | 0.10 | SNP       |
| chr6_32188603_C_T   | 32188603 | 1.43 | 1.17 | 1.75 | 0.000409 | 0.29 | 0.34 | 0.28 | SNP       |
| chr6_31325526_A_G   | 31325526 | 1.61 | 1.24 | 2.10 | 0.000412 | 0.33 | 0.36 | 0.32 | SNP       |
| chr6_31127562_C_T   | 31127562 | 1.66 | 1.25 | 2.19 | 0.000415 | 0.20 | 0.22 | 0.19 | SNP       |
| chr6_32627747_G_A   | 32627747 | 0.64 | 0.50 | 0.82 | 0.000421 | 0.30 | 0.26 | 0.32 | SNP       |
| chr6_32521117_T_C   | 32521117 | 0.68 | 0.55 | 0.84 | 0.000437 | 0.49 | 0.41 | 0.51 | SNP       |
| chr6_32185796_C_T   | 32185796 | 2.16 | 1.40 | 3.30 | 0.000438 | 0.03 | 0.05 | 0.03 | SNP       |
| chr6_32111725_G_A   | 32111725 | 0.66 | 0.53 | 0.84 | 0.000441 | 0.47 | 0.40 | 0.49 | SNP       |
| chr6_31122500_G_A   | 31122500 | 1.78 | 1.29 | 2.46 | 0.000443 | 0.19 | 0.23 | 0.18 | SNP       |
| chr6_32407433_C_T   | 32407433 | 0.67 | 0.53 | 0.83 | 0.000447 | 0.32 | 0.26 | 0.34 | SNP       |
| chr6_32521951_A_G   | 32521951 | 0.69 | 0.56 | 0.85 | 0.000449 | 0.37 | 0.31 | 0.39 | SNP       |
| chr6_32603488_G_A   | 32603488 | 0.68 | 0.55 | 0.84 | 0.000450 | 0.27 | 0.20 | 0.29 | SNP       |
| chr6_32164587_C_T   | 32164587 | 0.39 | 0.22 | 0.64 | 0.000464 | 0.04 | 0.02 | 0.05 | SNP       |
| chr6_32633665_T_C   | 32633665 | 0.65 | 0.51 | 0.82 | 0.000470 | 0.31 | 0.27 | 0.32 | SNP       |
| chr6_32408597_G_A   | 32408597 | 0.67 | 0.53 | 0.84 | 0.000482 | 0.42 | 0.35 | 0.44 | SNP       |
| chr6_32339498_C_G   | 32339498 | 0.40 | 0.24 | 0.65 | 0.000479 | 0.04 | 0.02 | 0.05 | SNP       |
| chr6_32408012_G_A   | 32408012 | 0.67 | 0.53 | 0.84 | 0.000487 | 0.33 | 0.26 | 0.34 | SNP       |
| chr6_32636494_C_T   | 32636494 | 0.67 | 0.54 | 0.84 | 0.000492 | 0.42 | 0.35 | 0.44 | SNP       |
| chr6_32184094_G_A   | 32184094 | 1.40 | 1.16 | 1.69 | 0.000497 | 0.43 | 0.48 | 0.41 | SNP       |
| chr6_32410137_C_T   | 32410137 | 1.45 | 1.17 | 1.78 | 0.000501 | 0.29 | 0.32 | 0.28 | SNP       |
| chr6_32374595_A_G   | 32374595 | 0.54 | 0.38 | 0.76 | 0.000503 | 0.18 | 0.15 | 0.19 | SNP       |
| chr6_3235529_G_A    | 3235529  | 0.54 | 0.38 | 0.76 | 0.000503 | 0.18 | 0.15 | 0.19 | SNP       |
| chr6_31325529_C_T   | 31325529 | 1.60 | 1.23 | 2.08 | 0.000507 | 0.33 | 0.36 | 0.32 | SNP       |
| chr6_31325521_C_G   | 31325521 | 1.60 | 1.23 | 2.08 | 0.000509 | 0.33 | 0.36 | 0.32 | SNP       |
| chr6_32171400_T_G   | 32171400 | 1.86 | 1.21 | 2.64 | 0.000511 | 0.20 | 0.22 | 0.19 | SNP       |
| chr6_32501296_G_A   | 32501296 | 0.70 | 0.57 | 0.85 | 0.000513 | 0.39 | 0.33 | 0.40 | SNP       |
| HLA_2F6d_DRB1_04_01 | 32546552 | 1.61 | 1.23 | 2.11 | 0.000513 | 0.13 | 0.20 | 0.11 | HLA (HLA) |
| chr6_31373445_T_C   | 31373445 | 2.33 | 1.43 | 3.73 | 0.000525 | 0.03 | 0.04 | 0.02 | SNP       |
| chr6_31336629_T_C   | 31336629 | 1.56 | 1.21 | 2.01 | 0.000530 | 0.35 | 0.38 | 0.34 | SNP       |
| chr6_32634010_G_A   | 32634010 | 0.65 | 0.51 | 0.83 | 0.000540 | 0.31 | 0.26 | 0.32 | SNP       |
| chr6_32184221_G_A   | 32184221 | 1.40 | 1.16 | 1.69 | 0.000559 | 0.43 | 0.48 | 0.41 | SNP       |
| chr6_32645558_G_A   | 32645558 | 0.70 | 0.57 | 0.85 | 0.000561 | 0.35 | 0.38 | 0.34 | SNP       |
| chr6_32192617_T_C   | 32192617 | 0.44 | 0.27 | 0.69 | 0.000570 | 0.05 | 0.03 | 0.06 | SNP       |
| chr6_32501301_G_C   | 32501301 | 0.70 | 0.57 | 0.85 | 0.000576 | 0.39 | 0.33 | 0.40 | SNP       |
| chr6_32780914_G_A   | 32780914 | 0.67 | 0.54 | 0.84 | 0.000578 | 0.09 | 0.06 | 0.10 | SNP       |
| chr6_32604968_A_C   | 32604968 | 0.62 | 0.48 | 0.81 | 0.000592 | 0.25 | 0.21 | 0.26 | SNP       |
| chr6_32409056_G_A   | 32409056 | 1.44 | 1.17 | 1.77 | 0.000602 | 0.29 | 0.32 | 0.28 | SNP       |
| chr6_32188297_G_A   | 32188297 | 1.42 | 1.16 | 1.73 | 0.000608 | 0.29 | 0.34 | 0.28 | SNP       |
| chr6_32613996_T_C   | 32613996 | 0.66 | 0.52 | 0.86 | 0.000613 | 0.38 | 0.35 | 0.34 | SNP       |
| chr6_32604538_G_A   | 32604538 | 1.51 | 1.19 | 1.91 | 0.000624 | 0.33 | 0.40 | 0.31 | SNP       |
| chr6_32149816_T_C   | 32149816 | 1.76 | 1.27 | 2.43 | 0.000639 | 0.16 | 0.18 | 0.16 | SNP       |
| chr6_32181076_C_A   | 32181076 | 0.57 | 0.41 | 0.74 | 0.000646 | 0.05 | 0.06 | 0.10 | SNP       |
| chr6_32149537_C_G   | 32149537 | 1.74 | 1.26 | 2.40 | 0.000643 | 0.17 | 0.19 | 0.16 | SNP       |
| chr6_32627494_T_C   | 32627494 | 1.48 | 1.18 | 1.85 | 0.000645 | 0.25 | 0.31 | 0.23 | SNP       |
| chr6_32611931_T_A   | 32611931 | 0.67 | 0.54 | 0.84 | 0.000650 | 0.46 | 0.40 | 0.48 | SNP       |
| chr6_32709964_T_C   | 32709964 | 0.69 | 0.55 | 0.85 | 0.000660 | 0.31 | 0.26 | 0.33 | SNP       |
| chr6_32550591_G_A   | 32550591 | 0.44 | 0.27 | 0.69 | 0.000677 | 0.06 | 0.03 | 0.06 | SNP       |
| chr6_32520595_G_A   | 32520595 | 0.70 | 0.57 | 0.86 | 0.000680 | 0.38 | 0.32 | 0.39 | SNP       |
| chr6_32559045_T_C   | 32559045 | 1.1  | 0.8  | 1.18 | 0.000686 | 0.43 | 0.37 | 0.44 | SNP       |
| chr6_32609514_T_C   | 32609514 | 0.68 | 0.54 | 0.85 | 0.000756 | 0.46 | 0.39 | 0.47 | SNP       |
| chr6_31321267_A_G   | 31321267 | 2.26 | 1.40 | 3.64 | 0.000766 | 0.12 | 0.13 | 0.12 | SNP       |
| chr6_32152142_A_G   | 32152142 | 1.73 | 1.25 | 2.35 | 0.000768 | 0.17 | 0.19 | 0.16 | SNP       |
| chr6_32633906_C_A   | 32633906 | 0.66 | 0.52 | 0.84 | 0.000784 | 0.33 | 0.28 | 0.34 | SNP       |
| chr6_29910189_T_A   | 29910189 | 1.38 | 1.14 | 1.67 | 0.000794 | 0.37 | 0.40 | 0.36 | SNP       |
| chr6_32439753_T_A   | 32439753 | 0.66 | 0.51 | 0.84 | 0.000796 | 0.31 | 0.26 | 0.32 | SNP       |
| chr6_32622784_A_G   | 32622784 | 0.68 | 0.54 | 0.85 | 0.000806 | 0.47 | 0.41 | 0.49 | SNP       |
| chr6_29891850_A_G   | 29891850 | 1.34 | 1.13 | 1.60 | 0.000827 | 0.43 | 0.46 | 0.42 | SNP       |
| chr6_32709990_C_T   | 32709990 | 0.69 | 0.56 | 0.86 | 0.000837 | 0.31 | 0.26 | 0.33 | SNP       |
| chr6_32441696_C_A   | 32441696 | 1.2  | 0.84 | 1.34 | 0.000844 | 0.07 | 0.04 | 0.07 | SNP       |
| chr6_32487677_T_C   | 32487677 | 1.66 | 1.23 | 2.23 | 0.000857 | 0.16 | 0.22 | 0.14 | SNP       |
| chr6_32636221_G_T   | 32636221 | 0.68 | 0.54 | 0.85 | 0.000870 | 0.45 | 0.39 | 0.47 | SNP       |
| chr6_32619940_G_C   | 32619940 | 0.42 | 0.24 | 0.68 | 0.000883 | 0.04 | 0.02 | 0.05 | SNP       |
| chr6_32406132_G_A   | 32406132 | 1.59 | 1.31 | 2.06 | 0.000909 | 0.33 | 0.35 | 0.33 | SNP       |
| chr6_32501311_C_T   | 32501311 | 0.71 | 0.58 | 0.87 | 0.000930 | 0.38 | 0.33 | 0.40 | SNP       |
| chr6_32408932_G_A   | 32408932 | 1.98 | 1.31 | 2.96 | 0.000946 | 0.03 | 0.05 | 0.03 | SNP       |
| chr6_32411573_C_T   | 32411573 | 0.68 | 0.54 | 0.85 | 0.000943 | 0.35 | 0.38 | 0.34 | SNP       |
| chr6_32628098_G_C   | 32628098 | 0.44 | 0.27 | 0.70 | 0.000949 | 0.05 | 0.03 | 0.05 | SNP       |
| chr6_32628751_T_C   | 32628751 | 0.68 | 0.55 | 0.86 | 0.000953 | 0.47 | 0.41 | 0.49 | SNP       |
| chr6_29910358_G_A   | 29910358 | 1.39 | 1.14 | 1.70 | 0.000967 | 0.46 | 0.49 | 0.45 | SNP       |
| chr6_32147696_G_A   | 32147696 | 1.72 | 1.24 | 2.37 | 0.000975 | 0.17 | 0.18 | 0.16 | SNP       |
| chr6_31323116_C_T   | 31323116 | 2.04 | 1.33 | 3.11 | 0.000984 | 0.03 | 0.05 | 0.03 | SNP       |
| chr6_32136029_A_G   | 32136029 | 2.15 | 1.35 | 3.37 | 0.000992 | 0.03 | 0.05 | 0.03 | SNP       |
| chr6_32170222_C_A   | 32170222 | 0.43 | 0.25 | 0.69 | 0.000998 | 0.06 | 0.03 | 0.05 | SNP       |
| chr6_32783365_T_C   | 32783365 | 0.59 | 0.43 | 0.80 | 0.001020 | 0.09 | 0.06 | 0.10 | SNP       |
| chr6_32629409_G_A   | 32629409 | 0.67 | 0.52 | 0.85 | 0.001030 | 0.32 | 0.27 | 0.33 | SNP       |
| chr6_32148031_A_G   | 32148031 | 1.71 | 1.24 | 2.35 | 0.001078 | 0.17 | 0.18 | 0.16 | SNP       |
| chr6_31321108_T_G   | 31321108 | 2.11 | 1.33 | 3.27 | 0.001097 | 0.03 | 0.04 | 0.02 | SNP       |
| chr6_32634387_T_C   | 32634387 | 0.67 | 0.52 | 0.85 | 0.001113 | 0.31 | 0.27 | 0.32 | SNP       |
| chr6_32629582_T_C   | 32629582 | 0.67 | 0.52 | 0.85 | 0.001124 | 0.31 | 0.26 | 0.32 | SNP       |
| chr6_32628737_G_A   | 32628737 | 0.69 | 0.55 | 0.86 | 0.001129 | 0.47 | 0.41 | 0.49 | SNP       |
| chr6_32628776_A_C   | 32628776 | 0.69 | 0.55 | 0.86 | 0.001131 | 0.47 | 0.41 | 0.49 | SNP       |
| chr6_32785029_T_C   | 32785029 | 0.59 | 0.43 | 0.80 | 0.001146 | 0.09 | 0.06 | 0.10 | SNP       |
| chr6_32322071_G_A   | 32322071 | 2.09 | 1.33 | 3.20 | 0.001153 | 0.03 | 0.05 | 0.03 | SNP       |
| chr6_32710010_G_T   | 32710010 | 0.70 | 0.56 | 0.87 | 0.001159 | 0.31 | 0.26 | 0.33 | SNP       |
| chr6_32785035_A_G   | 32785035 | 0.59 | 0.43 | 0.81 | 0.001203 | 0.09 | 0.06 | 0.10 | SNP       |
| chr6_32148256_C_T   | 32148256 | 0.43 | 0.25 | 0.70 | 0.001207 | 0.04 | 0.02 | 0.05 | SNP       |
| chr6_29893293_A_G   | 29893293 | 1.34 | 1.12 | 1.68 | 0.001209 | 0.43 | 0.51 | 0.47 | SNP       |
| chr6_32786516_C_T   | 32786516 | 0.55 | 0.38 | 0.78 | 0.001226 | 0.07 | 0.05 | 0.08 | SNP       |
| chr6_32550947_A_G   | 32550947 | 1.49 | 1.17 | 1.89 | 0.001229 | 0.22 | 0.29 | 0.20 | SNP       |
| chr6_32495578_T_C   | 32495578 | 1.40 | 1.14 | 1.72 | 0.001246 | 0.16 | 0.21 | 0.15 | SNP       |
| chr6_31323116_C_T   | 31323116 | 2.09 | 1.32 | 3.24 | 0.001245 | 0.03 | 0.04 | 0.02 | SNP       |
| chr6_31323455_A_G   | 31323455 | 2.09 | 1.32 | 3.24 | 0.001245 | 0.03 | 0.04 | 0.02 | SNP       |
| chr6_32489960_A_G   | 32489960 | 1.70 | 1.23 | 2.34 | 0.001248 | 0.06 | 0.09 | 0.06 | SNP       |
| chr6_32783406_G_A   | 32783406 | 0.55 | 0.38 | 0.78 | 0.001251 | 0.07 | 0.05 | 0.08 | SNP       |
| chr6_32783450_C_G   | 32783450 | 0.55 | 0.38 | 0.78 | 0.001251 | 0.07 | 0.05 | 0.08 | SNP       |
| chr6_31378257_G_A   | 31378257 | 2.09 | 1.32 | 3.24 | 0.001256 | 0.03 | 0.04 | 0.02 | SNP       |
| chr6_31322987_C_T   | 31322987 | 2.09 | 1.32 | 3.24 | 0.001256 | 0.03 | 0.04 | 0.02 | SNP       |
| chr6_32171075_A_G   | 32171075 | 1.62 | 1.21 | 2.17 | 0.001285 | 0.18 | 0.20 | 0.18 | SNP       |
| chr6_3112482_G_A    | 3112482  | 1.70 | 1.23 | 2.34 | 0.001308 | 0.19 | 0.23 | 0.19 | SNP       |
| HLA_2F6d_DRB1_06_04 | 32623744 | 0.42 | 0.24 | 0.70 | 0.001329 | 0.05 | 0.02 | 0.05 | HLA (HLA) |
| chr6_32303160_G_T   | 32303160 | 0.44 | 0.26 | 0.71 | 0.001342 | 0.04 | 0.02 | 0.05 | SNP       |
| chr6_32551568_C_G   | 32551568 | 0.71 | 0.58 | 0.88 | 0.001350 | 0.38 | 0.33 | 0.40 | SNP       |
| chr6_32611971_G_A   | 32611971 | 1.46 | 1.16 | 1.85 | 0.001353 | 0.28 | 0.35 | 0.26 | SNP       |
| chr6_31430900_G_C   | 31430900 | 2.10 | 1.32 | 3.29 | 0.001354 | 0.03 | 0.04 | 0.02 | SNP       |
| chr6_32154998_C_T   | 32154998 | 1.64 | 1.21 | 2.21 | 0.001369 | 0.18 | 0.21 | 0.18 | SNP       |
| chr6_32634834_T_C   | 32634834 | 0.69 | 0.55 | 0.87 | 0.001392 | 0.45 | 0.39 | 0.47 | SNP       |
| chr6_29893167_A_G   | 29893167 | 1.35 | 1.12 | 1.63 | 0.001415 | 0.48 | 0.51 |      |           |

|                   |          |      |      |      |          |      |      |      |     |
|-------------------|----------|------|------|------|----------|------|------|------|-----|
| chr6_32873794_C_T | 32873794 | 137  | 1.12 | 1.68 | 0.002033 | 0.16 | 0.21 | 0.15 | SNP |
| chr6_32629802_G_A | 32629802 | 0.70 | 0.56 | 0.88 | 0.002033 | 0.45 | 0.39 | 0.47 | SNP |
| chr6_31324375_G_T | 31324375 | 0.55 | 0.37 | 0.80 | 0.002044 | 0.09 | 0.06 | 0.09 | SNP |
| chr6_32607174_C_T | 32607174 | 1.42 | 1.14 | 1.77 | 0.002046 | 0.35 | 0.41 | 0.33 | SNP |
| chr6_31237918_G_C | 31237918 | 0.59 | 0.36 | 0.87 | 0.002046 | 0.78 | 0.04 | 0.09 | SNP |
| chr6_32612397_A_G | 32612397 | 1.41 | 1.13 | 1.76 | 0.002049 | 0.47 | 0.54 | 0.45 | SNP |
| chr6_32627489_G_A | 32627489 | 0.68 | 0.54 | 0.87 | 0.002052 | 0.43 | 0.37 | 0.45 | SNP |
| chr6_32186050_G_A | 32186050 | 1.49 | 1.13 | 1.76 | 0.002071 | 0.41 | 0.46 | 0.40 | SNP |
| chr6_32628439_G_A | 32628439 | 1.37 | 1.12 | 1.68 | 0.002075 | 0.40 | 0.46 | 0.39 | SNP |
| chr6_32628736_T_C | 32628736 | 0.70 | 0.56 | 0.88 | 0.002089 | 0.47 | 0.41 | 0.49 | SNP |
| chr6_31321776_T_C | 31321776 | 2.03 | 1.28 | 3.17 | 0.002096 | 0.03 | 0.04 | 0.02 | SNP |
| chr6_29893131_T_C | 29893131 | 0.65 | 0.17 | 0.65 | 0.002123 | 0.03 | 0.01 | 0.04 | SNP |
| chr6_32520774_C_T | 32520774 | 1.42 | 1.14 | 1.78 | 0.002140 | 0.30 | 0.37 | 0.29 | SNP |
| chr6_33590009_A_T | 33590009 | 0.51 | 0.33 | 0.77 | 0.002145 | 0.06 | 0.03 | 0.06 | SNP |
| chr6_32605705_T_G | 32605705 | 0.71 | 0.57 | 0.88 | 0.002186 | 0.46 | 0.40 | 0.47 | SNP |
| chr6_32607031_G_T | 32607031 | 1.44 | 1.14 | 1.82 | 0.002189 | 0.32 | 0.40 | 0.30 | SNP |
| chr6_32605708_A_G | 32605708 | 0.71 | 0.57 | 0.88 | 0.002219 | 0.46 | 0.40 | 0.47 | SNP |
| chr6_32607221_C_G | 32607221 | 0.57 | 0.40 | 0.81 | 0.002235 | 0.09 | 0.06 | 0.10 | SNP |
| chr6_31542661_G_C | 31542661 | 0.60 | 0.60 | 0.89 | 0.002261 | 0.25 | 0.21 | 0.27 | SNP |
| chr6_29895973_G_C | 29895973 | 1.42 | 1.13 | 1.79 | 0.002277 | 0.18 | 0.20 | 0.17 | SNP |
| chr6_31322690_A_G | 31322690 | 2.02 | 1.27 | 3.15 | 0.002291 | 0.03 | 0.04 | 0.02 | SNP |
| chr6_29944670_G_C | 29944670 | 1.37 | 1.12 | 1.69 | 0.002294 | 0.47 | 0.50 | 0.46 | SNP |
| chr6_32605274_C_T | 32605274 | 0.71 | 0.57 | 0.88 | 0.002311 | 0.45 | 0.39 | 0.47 | SNP |
| chr6_31324750_G_A | 31324750 | 0.56 | 0.39 | 0.81 | 0.002318 | 0.09 | 0.06 | 0.10 | SNP |
| chr6_32633285_T_C | 32633285 | 0.72 | 0.58 | 0.89 | 0.002330 | 0.36 | 0.31 | 0.37 | SNP |
| chr6_32608467_G_C | 32608467 | 1.42 | 1.13 | 1.78 | 0.002331 | 0.29 | 0.36 | 0.27 | SNP |
| chr6_32604000_T_G | 32604000 | 0.71 | 0.56 | 0.88 | 0.002358 | 0.46 | 0.39 | 0.47 | SNP |
| chr6_32618774_T_C | 32618774 | 0.68 | 0.53 | 0.87 | 0.002389 | 0.17 | 0.14 | 0.18 | SNP |
| chr6_32603098_T_C | 32603098 | 1.35 | 1.12 | 1.66 | 0.002417 | 0.46 | 0.55 | 0.46 | SNP |
| chr6_33548493_C_T | 33548493 | 0.73 | 0.60 | 0.89 | 0.002424 | 0.33 | 0.27 | 0.35 | SNP |
| chr6_32406704_G_T | 32406704 | 1.49 | 1.15 | 1.92 | 0.002467 | 0.21 | 0.24 | 0.21 | SNP |
| chr6_29944706_G_A | 29944706 | 1.51 | 1.15 | 1.97 | 0.002484 | 0.15 | 0.17 | 0.14 | SNP |
| chr6_31365640_C_T | 31365640 | 1.44 | 1.14 | 1.82 | 0.002484 | 0.13 | 0.16 | 0.12 | SNP |
| chr6_33639760_C_G | 33639760 | 0.75 | 0.62 | 0.90 | 0.002493 | 0.33 | 0.28 | 0.35 | SNP |
| chr6_32606085_T_A | 32606085 | 0.71 | 0.57 | 0.89 | 0.002512 | 0.45 | 0.39 | 0.47 | SNP |
| chr6_32604564_C_T | 32604564 | 1.43 | 1.13 | 1.83 | 0.002531 | 0.31 | 0.40 | 0.31 | SNP |
| chr6_31371071_C_A | 31371071 | 2.09 | 1.28 | 3.36 | 0.002531 | 0.03 | 0.05 | 0.02 | SNP |
| chr6_32635226_G_T | 32635226 | 0.71 | 0.56 | 0.89 | 0.002609 | 0.46 | 0.40 | 0.48 | SNP |
| chr6_31326703_T_C | 31326703 | 0.89 | 0.29 | 0.97 | 0.002621 | 0.12 | 0.13 | 0.12 | SNP |
| chr6_31566507_G_A | 31566507 | 0.50 | 0.31 | 0.77 | 0.002648 | 0.05 | 0.03 | 0.05 | SNP |
| chr6_32627535_T_G | 32627535 | 0.70 | 0.56 | 0.88 | 0.002659 | 0.45 | 0.39 | 0.47 | SNP |
| chr6_29908838_C_G | 29908838 | 1.33 | 1.10 | 1.59 | 0.002672 | 0.37 | 0.40 | 0.37 | SNP |
| chr6_32602412_T_C | 32602412 | 1.46 | 1.13 | 1.78 | 0.002688 | 0.48 | 0.56 | 0.46 | SNP |
| chr6_31910938_G_T | 31910938 | 0.59 | 0.41 | 0.82 | 0.002688 | 0.08 | 0.05 | 0.09 | SNP |
| chr6_32627714_G_T | 32627714 | 0.71 | 0.57 | 0.89 | 0.002701 | 0.45 | 0.39 | 0.47 | SNP |
| chr6_31326074_A_T | 31326074 | 2.09 | 1.29 | 3.37 | 0.002750 | 0.15 | 0.17 | 0.11 | SNP |
| chr6_32629314_A_G | 32629314 | 0.71 | 0.56 | 0.89 | 0.002756 | 0.47 | 0.41 | 0.49 | SNP |
| chr6_32520465_A_G | 32520465 | 0.73 | 0.59 | 0.90 | 0.002765 | 0.38 | 0.33 | 0.39 | SNP |
| chr6_32609105_A_G | 32609105 | 0.71 | 0.57 | 0.89 | 0.002767 | 0.46 | 0.40 | 0.48 | SNP |
| chr6_32634990_G_A | 32634990 | 0.59 | 0.42 | 0.83 | 0.002768 | 0.08 | 0.05 | 0.09 | SNP |
| chr6_32362447_C_T | 32362447 | 1.89 | 1.23 | 2.85 | 0.002776 | 0.03 | 0.05 | 0.03 | SNP |
| chr6_32373796_A_G | 32373796 | 1.89 | 1.23 | 2.85 | 0.002776 | 0.03 | 0.05 | 0.03 | SNP |
| chr6_29912368_T_C | 29912368 | 1.33 | 1.10 | 1.60 | 0.002798 | 0.38 | 0.40 | 0.37 | SNP |
| chr6_32603968_G_A | 32603968 | 0.71 | 0.57 | 0.89 | 0.002796 | 0.45 | 0.39 | 0.47 | SNP |
| chr6_29908954_A_G | 29908954 | 1.33 | 1.10 | 1.60 | 0.002805 | 0.37 | 0.40 | 0.37 | SNP |
| chr6_31325116_T_C | 31325116 | 1.51 | 1.15 | 1.97 | 0.002847 | 0.34 | 0.37 | 0.33 | SNP |
| chr6_29909807_G_T | 29909807 | 1.41 | 1.12 | 1.76 | 0.002886 | 0.18 | 0.20 | 0.17 | SNP |
| chr6_29909840_A_G | 29909840 | 1.31 | 1.10 | 1.57 | 0.002889 | 0.46 | 0.48 | 0.45 | SNP |
| chr6_32634103_C_T | 32634103 | 0.71 | 0.57 | 0.89 | 0.002895 | 0.45 | 0.39 | 0.47 | SNP |
| chr6_29909153_T_G | 29909153 | 1.32 | 1.10 | 1.59 | 0.002900 | 0.37 | 0.40 | 0.37 | SNP |
| chr6_31935464_C_G | 31935464 | 0.43 | 0.23 | 0.72 | 0.002915 | 0.04 | 0.02 | 0.04 | SNP |
| chr6_32611958_C_G | 32611958 | 1.43 | 1.13 | 1.81 | 0.002927 | 0.28 | 0.34 | 0.27 | SNP |
| chr6_31326471_C_T | 31326471 | 1.51 | 1.15 | 1.97 | 0.002925 | 0.13 | 0.16 | 0.12 | SNP |
| chr6_29909745_G_A | 29909745 | 1.32 | 1.10 | 1.59 | 0.002978 | 0.37 | 0.40 | 0.37 | SNP |
| chr6_32605754_A_T | 32605754 | 0.71 | 0.57 | 0.89 | 0.002982 | 0.46 | 0.40 | 0.47 | SNP |
| chr6_31180159_T_C | 31180159 | 1.44 | 1.13 | 1.84 | 0.002993 | 0.26 | 0.27 | 0.26 | SNP |
| chr6_29913542_G_A | 29913542 | 1.40 | 1.12 | 1.75 | 0.002993 | 0.18 | 0.20 | 0.18 | SNP |
| chr6_31910929_G_A | 31910929 | 0.59 | 0.41 | 0.83 | 0.003023 | 0.08 | 0.05 | 0.09 | SNP |
| chr6_32713267_A_G | 32713267 | 1.52 | 1.15 | 1.99 | 0.003040 | 0.09 | 0.11 | 0.08 | SNP |
| chr6_29912802_C_G | 29912802 | 1.46 | 1.13 | 1.80 | 0.003088 | 0.38 | 0.40 | 0.37 | SNP |
| chr6_31248324_C_T | 31248324 | 0.45 | 0.26 | 0.75 | 0.003091 | 0.04 | 0.02 | 0.05 | SNP |
| chr6_32611243_C_T | 32611243 | 1.41 | 1.12 | 1.77 | 0.003092 | 0.28 | 0.35 | 0.27 | SNP |
| chr6_29912830_C_T | 29912830 | 1.39 | 1.12 | 1.73 | 0.003110 | 0.19 | 0.21 | 0.18 | SNP |
| chr6_32607008_T_G | 32607008 | 0.72 | 0.57 | 0.89 | 0.003122 | 0.45 | 0.39 | 0.47 | SNP |
| chr6_31244332_C_T | 31244332 | 0.48 | 0.29 | 0.76 | 0.003127 | 0.04 | 0.02 | 0.05 | SNP |
| chr6_32627600_T_C | 32627600 | 0.71 | 0.57 | 0.89 | 0.003132 | 0.45 | 0.39 | 0.47 | SNP |
| chr6_32636289_T_C | 32636289 | 1.40 | 1.12 | 1.75 | 0.003139 | 0.23 | 0.29 | 0.22 | SNP |
| chr6_31326080_T_C | 31326080 | 0.61 | 0.44 | 0.84 | 0.003199 | 0.09 | 0.07 | 0.09 | SNP |
| chr6_33545340_G_A | 33545340 | 0.72 | 0.57 | 0.89 | 0.003214 | 0.26 | 0.20 | 0.27 | SNP |
| chr6_32520665_A_C | 32520665 | 0.73 | 0.60 | 0.90 | 0.003220 | 0.37 | 0.32 | 0.39 | SNP |
| chr6_29909616_C_T | 29909616 | 1.32 | 1.10 | 1.59 | 0.003223 | 0.37 | 0.40 | 0.37 | SNP |
| chr6_31248091_G_A | 31248091 | 0.45 | 0.25 | 0.74 | 0.003235 | 0.04 | 0.02 | 0.05 | SNP |
| chr6_29909033_G_A | 29909033 | 1.32 | 1.10 | 1.59 | 0.003241 | 0.37 | 0.39 | 0.36 | SNP |
| chr6_32163274_G_A | 32163274 | 1.83 | 1.21 | 2.72 | 0.003260 | 0.03 | 0.05 | 0.03 | SNP |
| chr6_32166380_C_G | 32166380 | 1.83 | 1.21 | 2.72 | 0.003260 | 0.03 | 0.05 | 0.03 | SNP |
| chr6_32134828_C_T | 32134828 | 0.42 | 0.22 | 0.72 | 0.003264 | 0.04 | 0.02 | 0.05 | SNP |
| chr6_31321211_C_G | 31321211 | 1.36 | 1.03 | 1.63 | 0.003275 | 0.41 | 0.37 | 0.42 | SNP |
| chr6_33039535_A_T | 33039535 | 1.45 | 1.13 | 1.85 | 0.003298 | 0.12 | 0.13 | 0.11 | SNP |
| chr6_33543409_A_C | 33543409 | 1.30 | 1.09 | 1.55 | 0.003314 | 0.40 | 0.47 | 0.39 | SNP |
| chr6_32627517_G_T | 32627517 | 0.71 | 0.56 | 0.89 | 0.003327 | 0.45 | 0.39 | 0.47 | SNP |
| chr6_29892615_C_T | 29892615 | 0.78 | 0.66 | 0.92 | 0.003348 | 0.56 | 0.47 | 0.50 | SNP |
| chr6_32628941_G_C | 32628941 | 1.39 | 1.12 | 1.74 | 0.003344 | 0.23 | 0.29 | 0.22 | SNP |
| chr6_32442296_C_T | 32442296 | 0.69 | 0.54 | 0.88 | 0.003356 | 0.29 | 0.25 | 0.30 | SNP |
| chr6_31241933_A_G | 31241933 | 1.56 | 1.16 | 2.10 | 0.003388 | 0.08 | 0.11 | 0.07 | SNP |
| chr6_32611373_A_G | 32611373 | 0.71 | 0.56 | 0.89 | 0.003388 | 0.49 | 0.43 | 0.51 | SNP |
| chr6_32605943_A_G | 32605943 | 0.72 | 0.57 | 0.89 | 0.003392 | 0.45 | 0.39 | 0.47 | SNP |
| chr6_29798610_C_T | 29798610 | 1.40 | 1.12 | 1.75 | 0.003399 | 0.18 | 0.20 | 0.17 | SNP |
| chr6_31325115_G_A | 31325115 | 1.50 | 1.14 | 1.86 | 0.003418 | 0.38 | 0.37 | 0.34 | SNP |
| chr6_33382943_T_G | 33382943 | 1.52 | 1.14 | 2.00 | 0.003434 | 0.10 | 0.12 | 0.09 | SNP |
| chr6_31326201_G_A | 31326201 | 1.48 | 1.13 | 1.91 | 0.003440 | 0.10 | 0.12 | 0.09 | SNP |
| chr6_29909472_C_G | 29909472 | 1.32 | 1.10 | 1.58 | 0.003440 | 0.37 | 0.40 | 0.37 | SNP |
| chr6_33136076_G_A | 33136076 | 1.49 | 1.14 | 1.95 | 0.003466 | 0.11 | 0.12 | 0.10 | SNP |
| chr6_32490732_G_A | 32490732 | 2.14 | 1.27 | 3.54 | 0.003479 | 0.02 | 0.04 | 0.02 | SNP |
| chr6_33610059_G_T | 33610059 | 0.72 | 0.57 | 0.90 | 0.003485 | 0.45 | 0.39 | 0.47 | SNP |
| chr6_29909751_C_T | 29909751 | 1.30 | 1.09 | 1.56 | 0.003512 | 0.46 | 0.48 | 0.45 | SNP |
| chr6_31116142_G_A | 31116142 | 1.45 | 1.13 | 1.86 | 0.003538 | 0.26 | 0.27 | 0.26 | SNP |
| chr6_32526540_A_G | 32526540 | 0.74 | 0.61 | 0.91 | 0.003551 | 0.41 | 0.36 | 0.42 | SNP |
| chr6_31241207_C_T | 31241207 | 1.44 | 1.10 | 1.80 | 0.003560 | 0.29 | 0.26 | 0.29 | SNP |
| chr6_31430065_C_T | 31430065 | 2.09 | 1.27 | 3.44 | 0.003604 | 0.12 | 0.13 | 0.11 | SNP |
| chr6_32627485_C_T | 32627485 | 0.70 | 0.55 | 0.89 | 0.003609 | 0.43 | 0.37 | 0.45 | SNP |
| chr6_32977044_G_A | 32977044 | 1.49 | 1.14 | 1.95 | 0.003619 | 0.09 | 0.10 | 0.09 | SNP |

|                   |          |      |      |      |          |      |      |      |           |
|-------------------|----------|------|------|------|----------|------|------|------|-----------|
| chr3_31507160_A_G | 31507160 | 0.40 | 0.20 | 0.72 | 0.004484 | 0.03 | 0.02 | 0.04 | SNP       |
| chr3_31511420_C_C | 31511420 | 0.58 | 0.39 | 0.83 | 0.004490 | 0.06 | 0.04 | 0.07 | SNP       |
| chr3_31902289_C_G | 31902289 | 0.54 | 0.34 | 0.81 | 0.004546 | 0.05 | 0.03 | 0.06 | SNP       |
| chr3_32628916_G_A | 32628916 | 1.38 | 1.10 | 1.71 | 0.004548 | 0.23 | 0.29 | 0.22 | SNP       |
| chr3_32608967_A_G | 32608967 | 0.61 | 0.43 | 0.85 | 0.004555 | 0.09 | 0.10 | 0.06 | SNP       |
| chr3_32636280_G_T | 32636280 | 1.38 | 1.10 | 1.73 | 0.004573 | 0.23 | 0.29 | 0.22 | SNP       |
| chr3_32612161_C_A | 32612161 | 1.39 | 1.11 | 1.74 | 0.004593 | 0.29 | 0.36 | 0.27 | SNP       |
| chr3_32627777_G_C | 32627777 | 1.37 | 1.10 | 1.70 | 0.004603 | 0.24 | 0.29 | 0.22 | SNP       |
| chr3_32605825_G_A | 32605825 | 1.51 | 1.13 | 1.99 | 0.004637 | 0.08 | 0.10 | 0.07 | SNP       |
| chr3_32605920_A_G | 32605920 | 0.72 | 0.58 | 0.90 | 0.004677 | 0.45 | 0.39 | 0.47 | SNP       |
| chr3_32628571_C_T | 32628571 | 1.39 | 1.11 | 1.75 | 0.004686 | 0.23 | 0.28 | 0.21 | SNP       |
| chr3_32606176_T_A | 32606176 | 0.72 | 0.58 | 0.90 | 0.004692 | 0.45 | 0.39 | 0.47 | SNP       |
| chr3_32976185_G_C | 32976185 | 0.39 | 0.20 | 0.72 | 0.004702 | 0.03 | 0.01 | 0.03 | SNP       |
| chr3_31248114_C_T | 31248114 | 0.48 | 0.28 | 0.78 | 0.004709 | 0.04 | 0.03 | 0.05 | SNP       |
| HLA_2_Hd_B_08_D1  | 31321552 | 0.63 | 0.45 | 0.86 | 0.004740 | 0.09 | 0.07 | 0.09 | HLA (HLA) |
| chr3_32604394_T_C | 32604394 | 1.39 | 1.11 | 1.74 | 0.004742 | 0.29 | 0.36 | 0.28 | SNP       |
| chr3_32611234_C_T | 32611234 | 1.38 | 1.10 | 1.74 | 0.004761 | 0.28 | 0.35 | 0.27 | SNP       |
| chr3_32612166_C_T | 32612166 | 1.39 | 1.10 | 1.74 | 0.004773 | 0.29 | 0.35 | 0.27 | SNP       |
| chr3_29912935_C_T | 29912935 | 1.39 | 1.10 | 1.75 | 0.004789 | 0.17 | 0.19 | 0.17 | SNP       |
| chr3_32526702_C_T | 32526702 | 0.60 | 0.42 | 0.85 | 0.004865 | 0.08 | 0.05 | 0.09 | SNP       |
| chr3_32628944_C_G | 32628944 | 1.39 | 1.10 | 1.75 | 0.004869 | 0.36 | 0.42 | 0.34 | SNP       |
| chr3_32605067_C_A | 32605067 | 1.50 | 1.13 | 1.98 | 0.004874 | 0.08 | 0.10 | 0.08 | SNP       |
| chr3_31323506_C_T | 31323506 | 1.94 | 1.22 | 3.08 | 0.004894 | 0.12 | 0.13 | 0.12 | SNP       |
| chr3_32409530_A_G | 32409530 | 1.31 | 1.08 | 1.57 | 0.004957 | 0.40 | 0.43 | 0.39 | SNP       |
| chr3_32604395_A_G | 32604395 | 1.50 | 1.13 | 1.99 | 0.004957 | 0.08 | 0.10 | 0.07 | SNP       |
| chr3_29852955_T_C | 29852955 | 1.39 | 1.10 | 1.75 | 0.004993 | 0.18 | 0.20 | 0.17 | SNP       |
| chr3_33596664_A_C | 33596664 | 0.55 | 0.35 | 0.82 | 0.005004 | 0.05 | 0.03 | 0.06 | SNP       |
| chr3_32604431_A_T | 32604431 | 1.50 | 1.13 | 1.99 | 0.005029 | 0.08 | 0.10 | 0.07 | SNP       |
| chr3_32611759_T_C | 32611759 | 0.62 | 0.44 | 0.86 | 0.005050 | 0.12 | 0.06 | 0.09 | SNP       |
| chr3_32605326_A_G | 32605326 | 1.50 | 1.12 | 1.98 | 0.005128 | 0.08 | 0.10 | 0.08 | SNP       |
| chr3_31321919_G_T | 31321919 | 1.72 | 1.17 | 2.49 | 0.005130 | 0.04 | 0.06 | 0.04 | SNP       |
| chr3_32604974_C_T | 32604974 | 1.50 | 1.12 | 1.99 | 0.005153 | 0.08 | 0.10 | 0.07 | SNP       |
| chr3_32608417_G_A | 32608417 | 1.38 | 1.10 | 1.73 | 0.005190 | 0.02 | 0.36 | 0.27 | SNP       |
| chr3_29913638_C_G | 29913638 | 1.37 | 1.10 | 1.71 | 0.005215 | 0.19 | 0.21 | 0.18 | SNP       |
| chr3_32609126_C_T | 32609126 | 0.73 | 0.58 | 0.91 | 0.005224 | 0.46 | 0.40 | 0.48 | SNP       |
| chr3_29913727_C_T | 29913727 | 1.37 | 1.10 | 1.70 | 0.005225 | 0.10 | 0.21 | 0.19 | SNP       |
| chr3_32793721_G_C | 32793721 | 1.63 | 1.15 | 2.29 | 0.005273 | 0.06 | 0.10 | 0.05 | SNP       |
| chr3_32609476_T_C | 32609476 | 1.50 | 1.12 | 1.99 | 0.005289 | 0.08 | 0.10 | 0.07 | SNP       |
| chr3_29918726_G_A | 29918726 | 1.37 | 1.10 | 1.73 | 0.005292 | 0.19 | 0.21 | 0.18 | SNP       |
| chr3_32611510_C_G | 32611510 | 0.73 | 0.58 | 0.91 | 0.005342 | 0.47 | 0.41 | 0.48 | SNP       |
| chr3_32629755_G_A | 32629755 | 1.36 | 1.10 | 1.70 | 0.005343 | 0.24 | 0.29 | 0.22 | SNP       |
| chr3_3112602_G_C  | 3112602  | 1.41 | 1.11 | 1.80 | 0.005418 | 0.26 | 0.27 | 0.26 | SNP       |
| chr3_3284876_C_T  | 3284876  | 1.39 | 1.14 | 1.75 | 0.005420 | 0.06 | 0.10 | 0.05 | SNP       |
| chr3_32628506_C_A | 32628506 | 1.38 | 1.10 | 1.73 | 0.005430 | 0.23 | 0.28 | 0.21 | SNP       |
| chr3_32793534_T_C | 32793534 | 1.62 | 1.15 | 2.28 | 0.005434 | 0.06 | 0.10 | 0.05 | SNP       |
| chr3_32626221_G_A | 32626221 | 1.36 | 1.10 | 1.69 | 0.005472 | 0.31 | 0.38 | 0.29 | SNP       |
| chr3_31924880_G_A | 31924880 | 0.61 | 0.43 | 0.86 | 0.005474 | 0.09 | 0.06 | 0.09 | SNP       |
| chr3_33219142_A_C | 33219142 | 0.76 | 0.63 | 0.92 | 0.005501 | 0.34 | 0.28 | 0.35 | SNP       |
| chr3_31868827_G_T | 31868827 | 1.48 | 1.12 | 1.95 | 0.005513 | 0.33 | 0.35 | 0.33 | SNP       |
| chr3_32609427_C_T | 32609427 | 0.73 | 0.58 | 0.91 | 0.005566 | 0.46 | 0.39 | 0.47 | SNP       |
| chr3_32628760_C_A | 32628760 | 1.37 | 1.10 | 1.71 | 0.005609 | 0.23 | 0.29 | 0.22 | SNP       |
| chr3_32634007_A_G | 32634007 | 1.36 | 1.09 | 1.70 | 0.005629 | 0.24 | 0.29 | 0.22 | SNP       |
| chr3_32376788_C_T | 32376788 | 1.36 | 1.09 | 1.68 | 0.005657 | 0.45 | 0.49 | 0.44 | SNP       |
| chr3_31245534_A_C | 31245534 | 1.45 | 1.11 | 1.88 | 0.005668 | 0.10 | 0.12 | 0.09 | SNP       |
| chr3_32559674_T_A | 32559674 | 1.52 | 1.12 | 2.03 | 0.005681 | 0.08 | 0.10 | 0.07 | SNP       |
| chr3_29915117_G_A | 29915117 | 1.37 | 1.09 | 1.71 | 0.005692 | 0.19 | 0.21 | 0.19 | SNP       |
| chr3_31606756_A_T | 31606756 | 0.66 | 0.48 | 0.88 | 0.005702 | 0.10 | 0.08 | 0.11 | SNP       |
| chr3_32610300_C_T | 32610300 | 0.62 | 0.44 | 0.86 | 0.005708 | 0.08 | 0.06 | 0.09 | SNP       |
| chr3_3121360_G_A  | 3121360  | 1.58 | 1.14 | 2.18 | 0.005742 | 0.19 | 0.21 | 0.18 | SNP       |
| chr3_29897759_A_G | 29897759 | 1.37 | 1.09 | 1.70 | 0.005743 | 0.20 | 0.22 | 0.19 | SNP       |
| chr3_32559124_T_C | 32559124 | 1.39 | 1.10 | 1.75 | 0.005762 | 0.28 | 0.35 | 0.26 | SNP       |
| chr3_29896268_C_T | 29896268 | 1.29 | 1.08 | 1.54 | 0.005789 | 0.44 | 0.46 | 0.43 | SNP       |
| chr3_29910286_T_C | 29910286 | 1.37 | 1.10 | 1.72 | 0.005797 | 0.10 | 0.12 | 0.19 | SNP       |
| chr3_32608483_T_C | 32608483 | 1.37 | 1.10 | 1.72 | 0.005798 | 0.29 | 0.36 | 0.27 | SNP       |
| chr3_29910176_T_C | 29910176 | 1.31 | 1.08 | 1.58 | 0.005807 | 0.39 | 0.41 | 0.38 | SNP       |
| chr3_32612241_A_T | 32612241 | 1.37 | 1.10 | 1.72 | 0.005811 | 0.29 | 0.35 | 0.27 | SNP       |
| chr3_31326948_C_A | 31326948 | 0.66 | 0.49 | 0.88 | 0.005813 | 0.11 | 0.08 | 0.11 | SNP       |
| chr3_32605759_A_T | 32605759 | 0.73 | 0.59 | 0.91 | 0.005825 | 0.46 | 0.40 | 0.47 | SNP       |
| chr3_32605689_C_A | 32605689 | 1.49 | 1.12 | 1.97 | 0.005851 | 0.08 | 0.10 | 0.07 | SNP       |
| chr3_32825378_A_G | 32825378 | 1.41 | 1.05 | 1.65 | 0.005855 | 0.45 | 0.41 | 0.46 | SNP       |
| chr3_32520664_G_A | 32520664 | 1.36 | 1.09 | 1.69 | 0.005863 | 0.31 | 0.38 | 0.29 | SNP       |
| chr3_32636351_T_C | 32636351 | 1.36 | 1.09 | 1.70 | 0.005867 | 0.24 | 0.29 | 0.22 | SNP       |
| chr3_32611769_G_C | 32611769 | 1.40 | 1.10 | 1.77 | 0.005873 | 0.31 | 0.38 | 0.29 | SNP       |
| chr3_32629639_T_C | 32629639 | 1.36 | 1.09 | 1.69 | 0.005879 | 0.24 | 0.29 | 0.22 | SNP       |
| chr3_31110391_G_C | 31110391 | 1.40 | 1.10 | 1.79 | 0.005884 | 0.26 | 0.27 | 0.26 | SNP       |
| chr3_32412580_C_T | 32412580 | 1.41 | 1.10 | 1.79 | 0.005890 | 0.23 | 0.25 | 0.22 | SNP       |
| chr3_32606960_A_G | 32606960 | 0.62 | 0.43 | 0.86 | 0.005907 | 0.06 | 0.05 | 0.09 | SNP       |
| chr3_32636217_G_A | 32636217 | 1.36 | 1.09 | 1.70 | 0.006017 | 0.23 | 0.29 | 0.22 | SNP       |
| chr3_32605861_A_G | 32605861 | 0.62 | 0.44 | 0.86 | 0.006018 | 0.08 | 0.05 | 0.09 | SNP       |
| chr3_29896680_G_A | 29896680 | 1.28 | 1.07 | 1.53 | 0.006022 | 0.49 | 0.51 | 0.49 | SNP       |
| chr3_32611265_C_T | 32611265 | 1.37 | 1.09 | 1.72 | 0.006044 | 0.29 | 0.35 | 0.27 | SNP       |
| chr3_31326683_G_A | 31326683 | 0.67 | 0.50 | 0.89 | 0.006064 | 0.11 | 0.08 | 0.11 | SNP       |
| chr3_32085278_C_T | 32085278 | 1.92 | 1.19 | 3.03 | 0.006069 | 0.03 | 0.04 | 0.03 | SNP       |
| chr3_32335230_G_A | 32335230 | 1.37 | 1.09 | 1.73 | 0.006100 | 0.23 | 0.28 | 0.22 | SNP       |
| chr3_32976147_A_T | 32976147 | 0.39 | 0.19 | 0.73 | 0.006103 | 0.03 | 0.01 | 0.03 | SNP       |
| chr3_32633415_C_T | 32633415 | 1.48 | 1.12 | 1.95 | 0.006119 | 0.16 | 0.18 | 0.16 | SNP       |
| chr3_31323416_G_A | 31323416 | 0.62 | 0.44 | 0.86 | 0.006142 | 0.11 | 0.13 | 0.12 | SNP       |
| chr3_32612096_G_A | 32612096 | 0.62 | 0.44 | 0.87 | 0.006158 | 0.08 | 0.06 | 0.09 | SNP       |
| chr3_32550819_C_A | 32550819 | 1.37 | 1.09 | 1.72 | 0.006201 | 0.29 | 0.35 | 0.27 | SNP       |
| chr3_32481150_C_T | 32481150 | 1.37 | 1.09 | 1.72 | 0.006211 | 0.30 | 0.36 | 0.28 | SNP       |
| chr3_32605950_C_T | 32605950 | 0.62 | 0.44 | 0.86 | 0.006222 | 0.06 | 0.05 | 0.09 | SNP       |
| chr3_32781112_C_T | 32781112 | 1.62 | 1.14 | 2.28 | 0.006237 | 0.06 | 0.09 | 0.05 | SNP       |
| chr3_29855120_T_G | 29855120 | 1.30 | 1.08 | 1.57 | 0.006252 | 0.31 | 0.33 | 0.31 | SNP       |
| chr3_32559212_A_G | 32559212 | 1.38 | 1.10 | 1.74 | 0.006262 | 0.29 | 0.35 | 0.27 | SNP       |
| chr3_32817130_A_G | 32817130 | 0.73 | 0.58 | 0.91 | 0.006278 | 0.18 | 0.15 | 0.19 | SNP       |
| chr3_31473247_C_T | 31473247 | 0.46 | 0.26 | 0.78 | 0.006313 | 0.03 | 0.02 | 0.04 | SNP       |
| chr3_31932209_G_A | 31932209 | 0.43 | 0.23 | 0.76 | 0.006316 | 0.04 | 0.02 | 0.04 | SNP       |
| chr3_32638819_A_G | 32638819 | 0.73 | 0.58 | 0.91 | 0.006322 | 0.50 | 0.54 | 0.49 | SNP       |
| chr3_32610105_A_G | 32610105 | 1.50 | 1.12 | 1.99 | 0.006322 | 0.08 | 0.10 | 0.07 | SNP       |
| chr3_32608946_G_A | 32608946 | 0.63 | 0.44 | 0.87 | 0.006340 | 0.08 | 0.06 | 0.09 | SNP       |
| chr3_31373025_G_A | 31373025 | 1.32 | 1.08 | 1.60 | 0.006383 | 0.21 | 0.25 | 0.20 | SNP       |
| chr3_31934372_C_T | 31934372 | 0.64 | 0.46 | 0.88 | 0.006404 | 0.12 | 0.08 | 0.12 | SNP       |
| chr3_32610330_A_T | 32610330 | 1.48 | 1.11 | 1.96 | 0.006416 | 0.08 | 0.10 | 0.07 | SNP       |
| chr3_32611215_C_C | 32611215 | 0.63 | 0.45 | 0.87 | 0.006422 | 0.08 | 0.06 | 0.09 | SNP       |
| chr3_31244082_C_T | 31244082 | 1.45 | 1.10 | 1.88 | 0.006520 | 0.10 | 0.12 | 0.09 | SNP       |
| chr3_31540957_T_C | 31540957 | 0.46 | 0.26 | 0.78 | 0.006525 | 0.03 | 0.02 | 0.04 | SNP       |
| chr3_31538277_G_A | 31538277 | 0.46 | 0.26 | 0.78 | 0.006565 | 0.03 | 0.02 | 0.04 | SNP       |
| chr3_31619596_T_G | 31619596 | 1.62 | 1.14 | 2.48 | 0.006566 | 0.08 | 0.06 | 0.09 | SNP       |
| chr3_32611650_G_A | 32611650 | 1.38 | 1.09 | 1.74 | 0.006573 | 0.28 | 0.34 | 0.27 | SNP       |
| chr3_32171279_C_T | 32171279 | 1.74 | 1.16 | 2.58 | 0.006582 | 0.03 | 0.05 | 0.03 | SNP       |
| chr3_32171288_C_T | 32171288 | 1.74 | 1.16 | 2.58 | 0.006582 | 0.03 | 0.05 | 0.03 | SNP       |
| HLA_2_Hd_B_0      |          |      |      |      |          |      |      |      |           |



|                    |          |      |      |      |          |      |      |      |            |
|--------------------|----------|------|------|------|----------|------|------|------|------------|
| chr6_32612279_T_C  | 32612279 | 136  | 1.09 | 1.71 | 0.007200 | 0.39 | 0.35 | 0.37 | SNP        |
| chr6_32608531_A_C  | 32608531 | 136  | 1.09 | 1.71 | 0.007212 | 0.29 | 0.36 | 0.27 | SNP        |
| xHLA_2Hidd_C_06_02 | 31236526 | 1.54 | 1.12 | 2.11 | 0.007240 | 0.06 | 0.08 | 0.06 | HLA (xHLA) |
| chr6_32604384_G_A  | 32604384 | 0.62 | 0.44 | 0.87 | 0.007265 | 0.08 | 0.06 | 0.09 | SNP        |
| chr6_32610696_G_T  | 32610696 | 0.63 | 0.45 | 0.83 | 0.007271 | 0.08 | 0.06 | 0.09 | SNP        |
| xHLA_2Hidd_A_03_01 | 29910309 | 1.39 | 1.09 | 1.76 | 0.007285 | 0.18 | 0.19 | 0.17 | HLA (xHLA) |
| chr6_32635033_T_G  | 32635033 | 1.35 | 1.08 | 1.67 | 0.007310 | 0.24 | 0.29 | 0.22 | SNP        |
| chr6_32633899_T_C  | 32633899 | 1.34 | 1.08 | 1.66 | 0.007354 | 0.24 | 0.29 | 0.23 | SNP        |
| chr6_31930351_A_G  | 31930351 | 0.54 | 0.33 | 0.83 | 0.007368 | 0.05 | 0.03 | 0.05 | SNP        |
| chr6_31237449_C_T  | 31237449 | 1.45 | 1.10 | 1.90 | 0.007397 | 0.32 | 0.35 | 0.31 | SNP        |
| chr6_32559444_C_T  | 32559444 | 0.65 | 0.47 | 0.88 | 0.007430 | 0.09 | 0.06 | 0.10 | SNP        |
| chr6_32645094_T_G  | 32645094 | 1.35 | 1.08 | 1.68 | 0.007431 | 0.24 | 0.29 | 0.22 | SNP        |
| chr6_31901773_G_A  | 31901773 | 0.47 | 0.26 | 0.80 | 0.007438 | 0.03 | 0.02 | 0.04 | SNP        |
| chr6_29913074_G_A  | 29913074 | 1.35 | 1.08 | 1.68 | 0.007479 | 0.19 | 0.21 | 0.19 | SNP        |
| chr6_32629398_G_C  | 32629398 | 1.35 | 1.08 | 1.68 | 0.007491 | 0.24 | 0.29 | 0.23 | SNP        |
| chr6_32614403_G_A  | 32614403 | 1.37 | 1.09 | 1.71 | 0.007514 | 0.27 | 0.33 | 0.25 | SNP        |
| chr6_32635949_G_A  | 32635949 | 1.32 | 1.08 | 1.61 | 0.007608 | 0.29 | 0.34 | 0.27 | SNP        |
| chr6_32633636_G_A  | 32633636 | 1.34 | 1.08 | 1.67 | 0.007629 | 0.24 | 0.29 | 0.23 | SNP        |
| chr6_31325117_C_T  | 31325117 | 0.67 | 0.50 | 0.92 | 0.007634 | 0.10 | 0.08 | 0.11 | SNP        |
| chr6_32550931_C_A  | 32550931 | 1.38 | 1.09 | 1.74 | 0.007703 | 0.23 | 0.29 | 0.21 | SNP        |
| chr6_30879987_C_T  | 30879987 | 1.74 | 1.16 | 2.62 | 0.007815 | 0.12 | 0.13 | 0.11 | SNP        |
| chr6_32185142_G_A  | 32185142 | 1.58 | 1.12 | 2.20 | 0.007836 | 0.06 | 0.10 | 0.05 | SNP        |
| chr6_32633781_C_T  | 32633781 | 1.34 | 1.08 | 1.67 | 0.007880 | 0.24 | 0.29 | 0.23 | SNP        |
| chr6_33546498_C_T  | 33546498 | 1.29 | 1.07 | 1.56 | 0.007890 | 0.22 | 0.25 | 0.21 | SNP        |
| chr6_32823257_T_C  | 32823257 | 0.79 | 0.67 | 0.94 | 0.007907 | 0.45 | 0.41 | 0.46 | SNP        |
| chr6_32606779_G_A  | 32606779 | 1.47 | 1.10 | 1.95 | 0.007920 | 0.08 | 0.10 | 0.08 | SNP        |
| chr6_29913078_G_A  | 29913078 | 1.35 | 1.08 | 1.68 | 0.007983 | 0.19 | 0.21 | 0.19 | SNP        |
| chr6_32629530_C_T  | 32629530 | 1.34 | 1.08 | 1.67 | 0.007986 | 0.24 | 0.29 | 0.23 | SNP        |
| chr6_32635724_A_G  | 32635724 | 0.62 | 0.43 | 0.87 | 0.007987 | 0.02 | 0.05 | 0.08 | SNP        |
| chr6_31321407_C_T  | 31321407 | 0.68 | 0.51 | 0.90 | 0.008000 | 0.11 | 0.08 | 0.12 | SNP        |
| chr6_32804381_A_T  | 32804381 | 0.57 | 0.37 | 0.85 | 0.008012 | 0.06 | 0.04 | 0.06 | SNP        |
| chr6_32822975_T_A  | 32822975 | 0.79 | 0.66 | 0.94 | 0.008013 | 0.43 | 0.40 | 0.44 | SNP        |
| chr6_32633767_G_T  | 32633767 | 1.34 | 1.08 | 1.67 | 0.008015 | 0.46 | 0.29 | 0.22 | SNP        |
| chr6_32605724_A_G  | 32605724 | 1.36 | 1.08 | 1.70 | 0.008023 | 0.29 | 0.35 | 0.27 | SNP        |
| chr6_32340596_T_A  | 32340596 | 0.53 | 0.32 | 0.83 | 0.008097 | 0.04 | 0.03 | 0.05 | SNP        |
| chr6_32634098_C_T  | 32634098 | 1.32 | 1.08 | 1.67 | 0.008132 | 0.24 | 0.29 | 0.23 | SNP        |
| chr6_32611709_T_C  | 32611709 | 0.64 | 0.45 | 0.88 | 0.008141 | 0.08 | 0.06 | 0.09 | SNP        |
| chr6_32944094_G_C  | 32944094 | 1.43 | 1.09 | 1.87 | 0.008163 | 0.09 | 0.12 | 0.08 | SNP        |
| chr6_31645495_G_A  | 31645495 | 1.31 | 1.16 | 1.85 | 0.008171 | 0.03 | 0.04 | 0.03 | SNP        |
| chr6_32612251_T_G  | 32612251 | 1.36 | 1.08 | 1.70 | 0.008178 | 0.29 | 0.35 | 0.27 | SNP        |
| chr6_31560565_C_T  | 31560565 | 0.47 | 0.26 | 0.80 | 0.008271 | 0.03 | 0.02 | 0.04 | SNP        |
| chr6_31242064_T_A  | 31242064 | 0.61 | 0.42 | 0.87 | 0.008278 | 0.09 | 0.07 | 0.09 | SNP        |
| chr6_30029694_A_G  | 30029694 | 1.42 | 1.16 | 1.92 | 0.008287 | 0.15 | 0.14 | 0.10 | SNP        |
| chr6_29854703_G_A  | 29854703 | 1.33 | 1.07 | 1.73 | 0.008421 | 0.19 | 0.21 | 0.18 | SNP        |
| chr6_32612326_T_G  | 32612326 | 1.36 | 1.08 | 1.70 | 0.008451 | 0.29 | 0.35 | 0.27 | SNP        |
| chr6_32611760_G_A  | 32611760 | 1.36 | 1.08 | 1.71 | 0.008486 | 0.39 | 0.35 | 0.27 | SNP        |
| chr6_32627635_T_C  | 32627635 | 0.74 | 0.59 | 0.92 | 0.008514 | 0.45 | 0.39 | 0.46 | SNP        |
| chr6_32610968_A_G  | 32610968 | 1.36 | 1.08 | 1.71 | 0.008519 | 0.27 | 0.32 | 0.25 | SNP        |
| chr6_31928306_A_G  | 31928306 | 0.83 | 0.45 | 0.88 | 0.008539 | 0.08 | 0.06 | 0.09 | SNP        |
| chr6_31509880_G_T  | 31509880 | 1.88 | 1.16 | 2.98 | 0.008549 | 0.03 | 0.04 | 0.03 | SNP        |
| chr6_32822907_T_C  | 32822907 | 0.79 | 0.67 | 0.94 | 0.008557 | 0.45 | 0.41 | 0.46 | SNP        |
| chr6_30857894_G_A  | 30857894 | 1.72 | 1.15 | 2.58 | 0.008583 | 0.12 | 0.13 | 0.11 | SNP        |
| chr6_32606757_T_C  | 32606757 | 1.72 | 1.15 | 2.58 | 0.008583 | 0.12 | 0.13 | 0.11 | SNP        |
| chr6_32611260_A_G  | 32611260 | 1.36 | 1.08 | 1.70 | 0.008586 | 0.29 | 0.35 | 0.27 | SNP        |
| chr6_32804798_G_A  | 32804798 | 1.31 | 1.07 | 1.59 | 0.008592 | 0.27 | 0.34 | 0.26 | SNP        |
| chr6_32603729_A_G  | 32603729 | 0.67 | 0.10 | 1.94 | 0.008620 | 0.08 | 0.10 | 0.08 | SNP        |
| chr6_32628787_C_T  | 32628787 | 1.35 | 1.08 | 1.69 | 0.008628 | 0.23 | 0.29 | 0.22 | SNP        |
| chr6_32607270_A_G  | 32607270 | 0.63 | 0.44 | 0.84 | 0.008690 | 0.08 | 0.06 | 0.09 | SNP        |
| chr6_31488393_C_G  | 31488393 | 0.47 | 0.26 | 0.81 | 0.008738 | 0.04 | 0.02 | 0.04 | SNP        |
| chr6_31608320_T_C  | 31608320 | 0.67 | 0.59 | 0.87 | 0.008787 | 0.46 | 0.40 | 0.48 | SNP        |
| chr6_32635172_C_T  | 32635172 | 1.34 | 1.08 | 1.66 | 0.008799 | 0.24 | 0.29 | 0.23 | SNP        |
| chr6_32635266_T_G  | 32635266 | 1.35 | 1.08 | 1.70 | 0.008808 | 0.23 | 0.28 | 0.21 | SNP        |
| chr6_32622858_G_C  | 32622858 | 1.39 | 1.07 | 1.67 | 0.008938 | 0.43 | 0.40 | 0.44 | SNP        |
| chr6_29913948_T_G  | 29913948 | 1.29 | 1.07 | 1.55 | 0.008921 | 0.38 | 0.40 | 0.38 | SNP        |
| chr6_31830593_A_C  | 31830593 | 0.47 | 0.26 | 0.80 | 0.008935 | 0.04 | 0.03 | 0.05 | SNP        |
| chr6_29913944_C_T  | 29913944 | 1.29 | 1.06 | 1.55 | 0.008938 | 0.38 | 0.40 | 0.38 | SNP        |
| chr6_31609341_T_C  | 31609341 | 0.74 | 0.58 | 0.93 | 0.009074 | 0.48 | 0.43 | 0.49 | SNP        |
| chr6_31930462_G_A  | 31930462 | 0.70 | 0.54 | 0.91 | 0.009077 | 0.14 | 0.11 | 0.14 | SNP        |
| chr6_32634556_G_A  | 32634556 | 1.35 | 1.08 | 1.68 | 0.009078 | 0.24 | 0.29 | 0.23 | SNP        |
| chr6_32376471_A_G  | 32376471 | 1.35 | 1.08 | 1.67 | 0.009080 | 0.19 | 0.24 | 0.19 | SNP        |
| chr6_31238522_C_T  | 31238522 | 1.31 | 1.07 | 1.61 | 0.009084 | 0.21 | 0.24 | 0.20 | SNP        |
| chr6_32629859_G_A  | 32629859 | 0.74 | 0.59 | 0.93 | 0.009089 | 0.49 | 0.44 | 0.50 | SNP        |
| chr6_32607047_T_C  | 32607047 | 1.36 | 1.08 | 1.71 | 0.009086 | 0.31 | 0.38 | 0.30 | SNP        |
| xHLA_2Hidd_B_57_01 | 31321652 | 1.87 | 1.16 | 2.98 | 0.009110 | 0.03 | 0.04 | 0.02 | HLA (xHLA) |
| chr6_32606266_C_T  | 32606266 | 1.46 | 1.09 | 1.94 | 0.009144 | 0.08 | 0.10 | 0.08 | SNP        |
| chr6_30879636_C_T  | 30879636 | 1.75 | 1.15 | 2.66 | 0.009151 | 0.11 | 0.13 | 0.11 | SNP        |
| chr6_32522498_G_C  | 32522498 | 0.75 | 0.61 | 0.93 | 0.009153 | 0.43 | 0.37 | 0.42 | SNP        |
| chr6_31751071_T_A  | 31751071 | 1.84 | 1.15 | 2.89 | 0.009162 | 0.03 | 0.04 | 0.03 | SNP        |
| chr6_31084684_G_A  | 31084684 | 0.77 | 0.63 | 0.94 | 0.009181 | 0.49 | 0.45 | 0.50 | SNP        |
| chr6_31634057_C_T  | 31634057 | 1.44 | 1.07 | 1.67 | 0.009326 | 0.24 | 0.29 | 0.22 | SNP        |
| chr6_31325764_C_G  | 31325764 | 0.69 | 0.51 | 0.91 | 0.009341 | 0.11 | 0.09 | 0.12 | SNP        |
| chr6_32013500_T_C  | 32013500 | 0.64 | 0.46 | 0.89 | 0.009438 | 0.09 | 0.07 | 0.10 | SNP        |
| chr6_32604059_A_G  | 32604059 | 1.34 | 1.07 | 1.68 | 0.009442 | 0.29 | 0.36 | 0.28 | SNP        |
| chr6_32344593_G_C  | 32344593 | 1.34 | 1.07 | 1.66 | 0.009489 | 0.24 | 0.28 | 0.22 | SNP        |
| chr6_32407537_C_T  | 32407537 | 0.53 | 0.32 | 0.84 | 0.009508 | 0.04 | 0.03 | 0.05 | SNP        |
| chr6_32798647_A_T  | 32798647 | 0.50 | 0.29 | 0.82 | 0.009527 | 0.04 | 0.02 | 0.04 | SNP        |
| chr6_31281303_C_C  | 31281303 | 1.51 | 1.10 | 2.05 | 0.009767 | 0.06 | 0.09 | 0.08 | SNP        |
| chr6_32712666_T_C  | 32712666 | 1.49 | 1.10 | 2.02 | 0.009712 | 0.14 | 0.16 | 0.14 | SNP        |
| chr6_32191457_G_A  | 32191457 | 0.74 | 0.59 | 0.93 | 0.009809 | 0.18 | 0.15 | 0.19 | SNP        |
| chr6_32634355_G_A  | 32634355 | 1.34 | 1.07 | 1.67 | 0.009901 | 0.24 | 0.29 | 0.22 | SNP        |
| chr6_33046462_T_C  | 33046462 | 0.76 | 0.62 | 0.93 | 0.010127 | 0.33 | 0.34 | 0.32 | SNP        |
| chr6_32634646_T_C  | 32634646 | 1.33 | 1.07 | 1.66 | 0.010012 | 0.24 | 0.29 | 0.22 | SNP        |
| chr6_32783405_C_T  | 32783405 | 1.55 | 1.11 | 2.15 | 0.010109 | 0.06 | 0.10 | 0.05 | SNP        |
| chr6_31707526_G_A  | 31707526 | 1.82 | 1.14 | 2.85 | 0.010123 | 0.03 | 0.04 | 0.03 | SNP        |
| chr6_31240060_G_A  | 31240060 | 1.43 | 1.09 | 1.88 | 0.010177 | 0.33 | 0.35 | 0.32 | SNP        |
| chr6_29857890_C_T  | 29857890 | 1.29 | 1.06 | 1.56 | 0.010197 | 0.24 | 0.26 | 0.23 | SNP        |
| chr6_32632041_A_G  | 32632041 | 1.35 | 1.07 | 1.70 | 0.010204 | 0.29 | 0.35 | 0.27 | SNP        |
| chr6_32603939_G_C  | 32603939 | 1.33 | 1.07 | 1.64 | 0.010217 | 0.33 | 0.35 | 0.32 | SNP        |
| chr6_32629066_T_C  | 32629066 | 1.34 | 1.07 | 1.68 | 0.010227 | 0.23 | 0.28 | 0.22 | SNP        |
| chr6_32604259_C_T  | 32604259 | 1.35 | 1.07 | 1.69 | 0.010272 | 0.29 | 0.36 | 0.28 | SNP        |
| chr6_32604544_C_T  | 32604544 | 1.35 | 1.07 | 1.69 | 0.010300 | 0.13 | 0.14 | 0.11 | SNP        |
| chr6_32635713_C_T  | 32635713 | 0.75 | 0.60 | 0.93 | 0.010334 | 0.48 | 0.42 | 0.49 | SNP        |
| chr6_32612008_T_C  | 32612008 | 1.35 | 1.07 | 1.71 | 0.010360 | 0.28 | 0.34 | 0.27 | SNP        |
| chr6_32610976_A_C  | 32610976 | 0.65 | 0.46 | 0.89 | 0.010455 | 0.08 | 0.06 | 0.09 | SNP        |
| chr6_29914034_A_G  | 29914034 | 1.29 | 1.06 | 1.57 | 0.010501 | 0.39 | 0.41 | 0.39 | SNP        |
| chr6_32785841_C_T  | 32785841 | 1.54 | 1.10 | 2.15 | 0.010574 | 0.06 | 0.10 | 0.05 | SNP        |
| chr6_31244230_C_A  | 31244230 | 1.57 | 1.11 | 2.21 | 0.010617 | 0.18 | 0.20 | 0.17 | SNP        |
| chr6_32633317_A_G  | 32633317 | 0.75 | 0.60 | 0.93 | 0.010623 | 0.49 | 0.39 | 0.46 | SNP        |
| chr6_32604108_T_C  | 32604108 | 1.34 | 1.07 | 1.68 | 0.010723 | 0.29 | 0.36 | 0.28 | SNP        |
| chr6_32490708_A_C  | 32490708 | 2.21 | 1.18 | 4.02 | 0.010748 | 0.02 | 0.03 | 0.01 | SNP        |
| chr6_32155581_A_G  | 32155581 | 1.37 | 1.07 | 1.75 | 0.010839 | 0.23 | 0.2  |      |            |



Table with columns: chr#, ID, chr#, chr#, chr#, chr#, chr#, chr#, chr#. Contains genomic coordinates for various chromosomes and bands (e.g., chr1\_21408933\_C\_A, chr2\_31324051\_C\_A, etc.).

|                      |          |     |      |      |          |      |      |      |           |
|----------------------|----------|-----|------|------|----------|------|------|------|-----------|
| chr6_29720604_G_A    | 29720604 | 135 | 1.05 | 1.75 | 0.019866 | 0.20 | 0.21 | 0.30 | SNP       |
| chr6_31275560_T_C    | 31275560 | 064 | 0.43 | 0.92 | 0.019866 | 0.07 | 0.05 | 0.07 | SNP       |
| chr6_31778272_A_G    | 31778272 | 140 | 1.05 | 1.86 | 0.019910 | 0.22 | 0.23 | 0.21 | SNP       |
| chr6_31241092_G_C    | 31241092 | 130 | 1.04 | 1.61 | 0.019992 | 0.38 | 0.40 | 0.38 | SNP       |
| chr6_30030114_G_C    | 30030114 | 133 | 1.04 | 1.69 | 0.020007 | 0.15 | 0.17 | 0.14 | SNP       |
| chr6_32490766_G_T    | 32490766 | 186 | 1.09 | 3.12 | 0.020174 | 0.02 | 0.03 | 0.02 | SNP       |
| chr6_29895913_G_A    | 29895913 | 081 | 0.68 | 0.97 | 0.020272 | 0.44 | 0.43 | 0.45 | SNP       |
| chr6_32181735_G_C    | 32181735 | 125 | 1.03 | 1.50 | 0.020310 | 0.39 | 0.43 | 0.38 | SNP       |
| chr6_32187514_T_C    | 32187514 | 129 | 1.04 | 1.60 | 0.020329 | 0.21 | 0.22 | 0.21 | SNP       |
| chr6_30796545_T_C    | 30796545 | 156 | 1.07 | 2.28 | 0.020356 | 0.12 | 0.13 | 0.12 | SNP       |
| chr6_31948400_T_G    | 31948400 | 055 | 0.33 | 0.89 | 0.020511 | 0.04 | 0.02 | 0.04 | SNP       |
| chr6_31935567_G_A    | 31935567 | 058 | 0.36 | 0.96 | 0.020754 | 0.04 | 0.03 | 0.05 | SNP       |
| chr6_32707551_A_G    | 32707551 | 124 | 1.03 | 1.49 | 0.020767 | 0.38 | 0.41 | 0.38 | SNP       |
| chr6_32628845_G_A    | 32628845 | 131 | 1.04 | 1.64 | 0.020859 | 0.36 | 0.42 | 0.35 | SNP       |
| chr6_31127037_C_T    | 31127037 | 060 | 0.38 | 0.91 | 0.020902 | 0.05 | 0.03 | 0.06 | SNP       |
| chr6_32610314_T_C    | 32610314 | 129 | 1.04 | 1.60 | 0.020958 | 0.33 | 0.35 | 0.32 | SNP       |
| chr6_32707558_G_A    | 32707558 | 124 | 1.03 | 1.49 | 0.020944 | 0.38 | 0.41 | 0.38 | SNP       |
| chr6_29768705_C_A    | 29768705 | 129 | 1.04 | 1.59 | 0.020944 | 0.25 | 0.26 | 0.25 | SNP       |
| chr6_3206331_A_C     | 3206331  | 074 | 0.18 | 0.56 | 0.020957 | 0.33 | 0.30 | 0.34 | SNP       |
| chr6_32187722_T_C    | 32187722 | 079 | 0.64 | 0.96 | 0.021023 | 0.45 | 0.40 | 0.46 | SNP       |
| chr6_32377061_C_T    | 32377061 | 130 | 1.04 | 1.62 | 0.021162 | 0.48 | 0.52 | 0.47 | SNP       |
| chr6_32107565_C_T    | 32107565 | 124 | 1.03 | 1.48 | 0.021224 | 0.38 | 0.41 | 0.38 | SNP       |
| chr6_32707566_G_A    | 32707566 | 124 | 1.03 | 1.48 | 0.021224 | 0.38 | 0.41 | 0.38 | SNP       |
| chr6_31629995_G_A    | 31629995 | 064 | 0.43 | 0.92 | 0.021263 | 0.06 | 0.04 | 0.07 | SNP       |
| chr6_32521591_C_T    | 32521591 | 131 | 1.04 | 1.64 | 0.021306 | 0.52 | 0.38 | 0.30 | SNP       |
| chr6_31238986_T_C    | 31238986 | 076 | 0.60 | 0.96 | 0.021622 | 0.21 | 0.21 | 0.21 | SNP       |
| chr6_32636385_A_T    | 32636385 | 126 | 1.03 | 1.53 | 0.021788 | 0.37 | 0.40 | 0.36 | SNP       |
| chr6_32629328_G_A    | 32629328 | 130 | 1.04 | 1.64 | 0.021864 | 0.23 | 0.28 | 0.22 | SNP       |
| HLA_Zifed_C_07_D1    | 31232067 | 041 | 1.18 | 1.88 | 0.021876 | 0.19 | 0.15 | 0.02 | HLA (HLA) |
| chr6_32559702_A_G    | 32559702 | 139 | 1.05 | 1.84 | 0.021929 | 0.21 | 0.27 | 0.19 | SNP       |
| HLA_Zifed_DRB1_13_01 | 32546552 | 067 | 0.47 | 0.93 | 0.022054 | 0.08 | 0.06 | 0.09 | HLA (HLA) |
| chr6_32608856_T_C    | 32608856 | 131 | 1.04 | 1.65 | 0.022504 | 0.28 | 0.34 | 0.27 | SNP       |
| chr6_32197466_G_A    | 32197466 | 145 | 1.05 | 2.00 | 0.022543 | 0.08 | 0.11 | 0.07 | SNP       |
| chr6_29795720_G_A    | 29795720 | 135 | 1.04 | 1.74 | 0.022588 | 0.19 | 0.20 | 0.18 | SNP       |
| chr6_29693011_T_C    | 29693011 | 129 | 1.03 | 1.60 | 0.022887 | 0.20 | 0.21 | 0.20 | SNP       |
| chr6_32626033_T_C    | 32626033 | 129 | 1.04 | 1.62 | 0.022957 | 0.21 | 0.28 | 0.22 | SNP       |
| chr6_29893403_C_G    | 29893403 | 137 | 1.04 | 1.78 | 0.022954 | 0.15 | 0.17 | 0.15 | SNP       |
| chr6_32627652_C_G    | 32627652 | 130 | 1.04 | 1.62 | 0.023014 | 0.37 | 0.43 | 0.36 | SNP       |
| chr6_29913668_G_T    | 29913668 | 138 | 1.03 | 1.97 | 0.023119 | 0.39 | 0.24 | 0.22 | SNP       |
| chr6_32636138_A_G    | 32636138 | 129 | 1.03 | 1.61 | 0.023494 | 0.23 | 0.28 | 0.22 | SNP       |
| chr6_29897736_C_T    | 29897736 | 128 | 1.03 | 1.58 | 0.023590 | 0.21 | 0.22 | 0.20 | SNP       |
| chr6_3124531_T_C     | 3124531  | 135 | 1.04 | 1.75 | 0.023656 | 0.31 | 0.33 | 0.31 | SNP       |
| chr6_3244258_G_A     | 3244258  | 127 | 1.03 | 1.65 | 0.023656 | 0.26 | 0.40 | 0.40 | SNP       |
| chr6_32411726_A_G    | 32411726 | 130 | 1.03 | 1.63 | 0.023686 | 0.25 | 0.27 | 0.24 | SNP       |
| chr6_29944314_C_T    | 29944314 | 123 | 1.03 | 1.47 | 0.023797 | 0.46 | 0.47 | 0.46 | SNP       |
| chr6_32629535_C_A    | 32629535 | 129 | 1.03 | 1.62 | 0.023868 | 0.37 | 0.43 | 0.35 | SNP       |
| chr6_31558702_C_T    | 31558702 | 179 | 1.08 | 2.96 | 0.023902 | 0.12 | 0.13 | 0.12 | SNP       |
| chr6_33280505_C_A    | 33280505 | 121 | 1.03 | 1.43 | 0.024091 | 0.35 | 0.40 | 0.34 | SNP       |
| chr6_32629400_A_G    | 32629400 | 129 | 1.03 | 1.62 | 0.024102 | 0.57 | 0.43 | 0.35 | SNP       |
| chr6_32608909_T_C    | 32608909 | 131 | 1.04 | 1.65 | 0.024103 | 0.27 | 0.33 | 0.25 | SNP       |
| chr6_29893235_C_T    | 29893235 | 082 | 0.69 | 0.97 | 0.024105 | 0.45 | 0.44 | 0.45 | SNP       |
| chr6_29895944_G_A    | 29895944 | 082 | 0.68 | 0.97 | 0.024147 | 0.45 | 0.44 | 0.45 | SNP       |
| chr6_32610994_C_A    | 32610994 | 131 | 1.04 | 1.66 | 0.024151 | 0.26 | 0.31 | 0.25 | SNP       |
| chr6_32609456_C_T    | 32609456 | 130 | 1.03 | 1.63 | 0.024178 | 0.29 | 0.35 | 0.28 | SNP       |
| chr6_32555432_G_A    | 32555432 | 142 | 1.04 | 1.91 | 0.024297 | 0.08 | 0.09 | 0.07 | SNP       |
| chr6_32713867_C_T    | 32713867 | 133 | 1.05 | 2.17 | 0.024306 | 0.20 | 0.17 | 0.20 | SNP       |
| chr6_31085382_C_A    | 31085382 | 081 | 0.67 | 0.97 | 0.024408 | 0.48 | 0.46 | 0.49 | SNP       |
| chr6_32527162_C_T    | 32527162 | 132 | 1.03 | 1.69 | 0.024408 | 0.13 | 0.16 | 0.13 | SNP       |
| chr6_29893195_G_A    | 29893195 | 122 | 1.03 | 1.45 | 0.024428 | 0.48 | 0.49 | 0.47 | SNP       |
| chr6_32614659_A_G    | 32614659 | 077 | 0.61 | 1.02 | 0.024452 | 0.16 | 0.13 | 0.16 | SNP       |
| chr6_32498208_T_C    | 32498208 | 130 | 1.03 | 1.64 | 0.024508 | 0.30 | 0.37 | 0.28 | SNP       |
| chr6_31601344_C_T    | 31601344 | 073 | 0.55 | 0.96 | 0.024515 | 0.29 | 0.26 | 0.30 | SNP       |
| chr6_32608576_C_A    | 32608576 | 126 | 1.03 | 1.55 | 0.024581 | 0.42 | 0.48 | 0.41 | SNP       |
| chr6_32629347_T_C    | 32629347 | 130 | 1.03 | 1.63 | 0.024583 | 0.36 | 0.42 | 0.35 | SNP       |
| chr6_32709965_G_T    | 32709965 | 073 | 0.55 | 0.96 | 0.024668 | 0.20 | 0.17 | 0.21 | SNP       |
| chr6_29857410_C_T    | 29857410 | 123 | 1.03 | 1.47 | 0.024811 | 0.29 | 0.30 | 0.29 | SNP       |
| chr6_32440987_G_A    | 32440987 | 146 | 1.05 | 2.02 | 0.024820 | 0.12 | 0.19 | 0.17 | SNP       |
| chr6_32707806_T_C    | 32707806 | 123 | 1.03 | 1.47 | 0.025269 | 0.38 | 0.41 | 0.38 | SNP       |
| chr6_32611860_G_A    | 32611860 | 143 | 1.04 | 1.96 | 0.025381 | 0.18 | 0.20 | 0.18 | SNP       |
| chr6_31240353_C_A    | 31240353 | 129 | 1.03 | 1.65 | 0.025392 | 0.28 | 0.30 | 0.27 | SNP       |
| chr6_31240663_A_T    | 31240663 | 147 | 1.05 | 2.05 | 0.025392 | 0.18 | 0.20 | 0.17 | SNP       |
| chr6_32313667_G_A    | 32313667 | 056 | 0.33 | 0.91 | 0.025430 | 0.04 | 0.02 | 0.04 | SNP       |
| chr6_32615581_A_G    | 32615581 | 123 | 1.03 | 1.70 | 0.025441 | 0.26 | 0.32 | 0.25 | SNP       |
| chr6_31275657_T_C    | 31275657 | 044 | 0.20 | 0.86 | 0.025629 | 0.02 | 0.01 | 0.03 | SNP       |
| chr6_32975014_T_C    | 32975014 | 122 | 1.02 | 1.45 | 0.025701 | 0.48 | 0.53 | 0.47 | SNP       |
| chr6_29895945_A_T    | 29895945 | 205 | 1.06 | 3.79 | 0.025741 | 0.01 | 0.02 | 0.01 | SNP       |
| chr6_29854082_T_A    | 29854082 | 124 | 1.03 | 1.62 | 0.025762 | 0.24 | 0.25 | 0.24 | SNP       |
| chr6_32636444_A_C    | 32636444 | 129 | 1.03 | 1.61 | 0.026152 | 0.23 | 0.28 | 0.22 | SNP       |
| chr6_32627367_G_A    | 32627367 | 058 | 0.36 | 0.92 | 0.026226 | 0.05 | 0.03 | 0.05 | SNP       |
| chr6_32707282_A_G    | 32707282 | 123 | 1.02 | 1.47 | 0.026352 | 0.38 | 0.41 | 0.38 | SNP       |
| chr6_31121208_G_T    | 31121208 | 132 | 1.03 | 1.68 | 0.026377 | 0.27 | 0.27 | 0.27 | SNP       |
| chr6_31239681_T_A    | 31239681 | 134 | 1.03 | 1.74 | 0.026382 | 0.41 | 0.44 | 0.40 | SNP       |
| chr6_32006317_T_C    | 32006317 | 071 | 0.53 | 0.96 | 0.026441 | 0.26 | 0.23 | 0.27 | SNP       |
| chr6_32010977_C_G    | 32010977 | 130 | 1.03 | 1.65 | 0.026466 | 0.26 | 0.31 | 0.25 | SNP       |
| chr6_32636154_C_G    | 32636154 | 128 | 1.03 | 1.60 | 0.026586 | 0.23 | 0.28 | 0.22 | SNP       |
| chr6_31235056_C_T    | 31235056 | 147 | 1.04 | 2.05 | 0.026587 | 0.15 | 0.16 | 0.15 | SNP       |
| chr6_3193945_G_A     | 3193945  | 124 | 1.03 | 1.62 | 0.026662 | 0.16 | 0.14 | 0.17 | SNP       |
| chr6_31702710_C_T    | 31702710 | 065 | 0.44 | 0.94 | 0.026785 | 0.06 | 0.04 | 0.06 | SNP       |
| chr6_32636063_G_A    | 32636063 | 128 | 1.03 | 1.59 | 0.026977 | 0.24 | 0.29 | 0.22 | SNP       |
| chr6_32806673_T_C    | 32806673 | 058 | 0.35 | 0.92 | 0.027296 | 0.04 | 0.02 | 0.04 | SNP       |
| chr6_32709346_T_C    | 32709346 | 123 | 1.02 | 1.47 | 0.027411 | 0.38 | 0.41 | 0.38 | SNP       |
| chr6_30228416_T_C    | 30228416 | 076 | 0.59 | 0.97 | 0.027434 | 0.20 | 0.15 | 0.21 | SNP       |
| chr6_32731313_T_A    | 32731313 | 074 | 0.56 | 0.96 | 0.027635 | 0.20 | 0.17 | 0.21 | SNP       |
| chr6_30515043_T_C    | 30515043 | 151 | 1.04 | 2.17 | 0.027702 | 0.11 | 0.12 | 0.11 | SNP       |
| chr6_31906828_C_A    | 31906828 | 058 | 0.35 | 0.92 | 0.027861 | 0.04 | 0.03 | 0.04 | SNP       |
| chr6_32500941_C_A    | 32500941 | 141 | 1.04 | 1.91 | 0.027915 | 0.18 | 0.20 | 0.18 | SNP       |
| chr6_3242127_T_C     | 3242127  | 135 | 1.03 | 1.76 | 0.027978 | 0.10 | 0.11 | 0.09 | SNP       |
| chr6_32625907_C_A    | 32625907 | 081 | 0.66 | 0.98 | 0.028006 | 0.36 | 0.32 | 0.37 | SNP       |
| chr6_32029183_C_T    | 32029183 | 070 | 0.51 | 0.96 | 0.028110 | 0.09 | 0.07 | 0.10 | SNP       |
| chr6_31495556_T_C    | 31495556 | 154 | 1.04 | 2.24 | 0.028217 | 0.04 | 0.05 | 0.04 | SNP       |
| chr6_31162128_A_T    | 31162128 | 131 | 1.03 | 1.67 | 0.028241 | 0.13 | 0.13 | 0.12 | SNP       |
| chr6_29895469_G_A    | 29895469 | 137 | 1.03 | 1.81 | 0.028273 | 0.14 | 0.16 | 0.14 | SNP       |
| chr6_31367882_G_A    | 31367882 | 156 | 1.05 | 2.32 | 0.028274 | 0.17 | 0.19 | 0.17 | SNP       |
| chr6_32063996_G_A    | 32063996 | 053 | 0.29 | 0.91 | 0.028406 | 0.04 | 0.02 | 0.04 | SNP       |
| HLA_Zifed_DRB1_07_01 | 32546552 | 139 | 1.03 | 1.86 | 0.028839 | 0.08 | 0.10 | 0.08 | HLA (HLA) |
| chr6_31275663_C_A    | 31275663 | 074 | 0.56 | 0.97 | 0.029038 | 0.19 | 0.14 | 0.20 | SNP       |
| chr6_32629509_A_C    | 32629509 | 128 | 1.03 | 1.60 | 0.029208 | 0.37 | 0.42 | 0.36 | SNP       |
| chr6_31281310_C_T    | 31281310 | 166 | 1.05 | 2.63 | 0.029217 | 0.13 | 0.13 | 0.12 | SNP       |
| chr6_32604642_A_G    | 32604642 | 130 | 1.03 | 1.66 | 0.029374 | 0.28 | 0.34 | 0.26 | SNP       |
| chr6_29896114_G_A    | 29896114 | 082 | 0.69 | 0.98 | 0.029410 | 0.48 | 0.47 | 0.48 | SNP       |
| chr6_31236879_T_C    | 31236879 | 078 | 0.63 | 0.97 | 0.029441 | 0.41 | 0.39 | 0.41 | SNP       |
| chr6_32520460_C_T    | 32520460 | 128 | 1.02 | 1.59 | 0.029452 | 0.31 | 0.37 | 0.30 | SN        |

|                     |          |      |      |      |          |      |      |      |           |
|---------------------|----------|------|------|------|----------|------|------|------|-----------|
| chr3_31326960_G_A   | 31326960 | 0.81 | 0.67 | 0.98 | 0.032073 | 0.38 | 0.34 | 0.39 | SNP       |
| chr3_33268737_C_A   | 33268737 | 1.20 | 1.01 | 1.42 | 0.032630 | 0.35 | 0.40 | 0.34 | SNP       |
| chr3_32409058_C_T   | 32409058 | 1.43 | 1.03 | 1.97 | 0.032671 | 0.18 | 0.19 | 0.17 | SNP       |
| chr3_29895604_C_G   | 29895604 | 0.83 | 0.70 | 0.98 | 0.032799 | 0.45 | 0.44 | 0.45 | SNP       |
| chr3_33268799_T_C   | 33268799 | 1.26 | 1.03 | 1.60 | 0.032923 | 0.37 | 0.35 | 0.03 | SNP       |
| chr3_29896084_G_A   | 29896084 | 0.83 | 0.69 | 0.98 | 0.033017 | 0.46 | 0.45 | 0.46 | SNP       |
| chr3_31730568_A_G   | 31730568 | 0.68 | 0.48 | 0.96 | 0.033018 | 0.07 | 0.05 | 0.08 | SNP       |
| chr3_31543101_G_A   | 31543101 | 1.57 | 1.03 | 2.17 | 0.033208 | 0.04 | 0.05 | 0.03 | SNP       |
| chr3_31880075_C_A   | 31880075 | 1.20 | 1.01 | 1.41 | 0.033684 | 0.35 | 0.40 | 0.34 | SNP       |
| chr3_33545125_A_G   | 33545125 | 1.25 | 1.02 | 1.53 | 0.033760 | 0.21 | 0.24 | 0.20 | SNP       |
| chr3_32605646_T_G   | 32605646 | 1.27 | 1.02 | 1.59 | 0.033804 | 0.30 | 0.36 | 0.29 | SNP       |
| chr3_32526994_G_A   | 32526994 | 1.69 | 1.02 | 2.72 | 0.033838 | 0.09 | 0.03 | 0.02 | SNP       |
| chr3_31084792_C_T   | 31084792 | 0.81 | 0.67 | 0.98 | 0.034131 | 0.48 | 0.45 | 0.48 | SNP       |
| chr3_33382241_T_C   | 33382241 | 1.19 | 1.01 | 1.40 | 0.034350 | 0.41 | 0.45 | 0.40 | SNP       |
| chr3_33288271_A_G   | 33288271 | 1.20 | 1.01 | 1.41 | 0.034849 | 0.35 | 0.40 | 0.34 | SNP       |
| chr3_3189192_G_A    | 3189192  | 0.59 | 0.36 | 0.94 | 0.035050 | 0.04 | 0.03 | 0.04 | SNP       |
| chr3_32441008_C_T   | 32441008 | 1.28 | 1.02 | 1.61 | 0.035110 | 0.31 | 0.36 | 0.29 | SNP       |
| chr3_32627700_A_G   | 32627700 | 0.77 | 0.61 | 0.98 | 0.035172 | 0.19 | 0.15 | 0.20 | SNP       |
| chr3_32134510_G_A   | 32134510 | 1.03 | 1.01 | 1.03 | 0.035172 | 0.22 | 0.23 | 0.22 | SNP       |
| chr3_31133677_G_A   | 31133677 | 0.51 | 0.26 | 0.92 | 0.035352 | 0.02 | 0.01 | 0.03 | SNP       |
| chr3_32725271_G_A   | 32725271 | 0.75 | 0.57 | 0.98 | 0.035398 | 0.21 | 0.18 | 0.22 | SNP       |
| chr3_29891229_T_C   | 29891229 | 1.24 | 1.01 | 1.52 | 0.035477 | 0.22 | 0.23 | 0.22 | SNP       |
| chr3_29854399_G_A   | 29854399 | 1.24 | 1.01 | 1.52 | 0.035498 | 0.23 | 0.24 | 0.23 | SNP       |
| chr3_32975257_C_T   | 32975257 | 1.20 | 1.01 | 1.43 | 0.035528 | 0.47 | 0.52 | 0.46 | SNP       |
| chr3_32606217_G_A   | 32606217 | 1.27 | 1.02 | 1.59 | 0.035601 | 0.30 | 0.36 | 0.29 | SNP       |
| chr3_29924889_C_A   | 29924889 | 0.81 | 0.67 | 0.99 | 0.035647 | 0.40 | 0.39 | 0.40 | SNP       |
| chr3_31241537_T_C   | 31241537 | 1.25 | 1.01 | 1.54 | 0.035672 | 0.29 | 0.33 | 0.29 | SNP       |
| chr3_32814975_T_C   | 32814975 | 0.78 | 0.61 | 0.98 | 0.035700 | 0.15 | 0.13 | 0.16 | SNP       |
| chr3_31211948_T_G   | 31211948 | 1.40 | 1.02 | 2.01 | 0.035763 | 0.04 | 0.09 | 0.09 | SNP       |
| chr3_29892732_G_C   | 29892732 | 1.27 | 1.01 | 1.59 | 0.035824 | 0.20 | 0.22 | 0.20 | SNP       |
| chr3_29855706_G_C   | 29855706 | 1.28 | 1.01 | 1.62 | 0.035971 | 0.24 | 0.24 | 0.23 | SNP       |
| chr3_32356557_A_G   | 32356557 | 1.50 | 1.02 | 2.17 | 0.036030 | 0.04 | 0.05 | 0.03 | SNP       |
| chr3_32629330_C_A   | 32629330 | 1.27 | 1.01 | 1.60 | 0.036436 | 0.23 | 0.27 | 0.22 | SNP       |
| chr3_31837277_A_C   | 31837277 | 1.25 | 1.01 | 1.55 | 0.036450 | 0.49 | 0.49 | 0.49 | SNP       |
| chr3_31477324_A_C   | 31477324 | 0.45 | 0.19 | 0.90 | 0.036457 | 0.02 | 0.01 | 0.03 | SNP       |
| chr3_31250301_C_A   | 31250301 | 1.43 | 1.02 | 2.01 | 0.036560 | 0.19 | 0.20 | 0.18 | SNP       |
| chr3_30228230_A_C   | 30228230 | 0.75 | 0.57 | 0.98 | 0.037202 | 0.20 | 0.15 | 0.21 | SNP       |
| chr3_32377053_C_T   | 32377053 | 1.69 | 1.01 | 2.74 | 0.037666 | 0.02 | 0.03 | 0.02 | SNP       |
| chr3_29943400_G_A   | 29943400 | 1.24 | 1.01 | 1.49 | 0.038108 | 0.21 | 0.23 | 0.21 | SNP       |
| chr3_31238029_C_T   | 31238029 | 1.31 | 1.01 | 1.69 | 0.038137 | 0.36 | 0.39 | 0.35 | SNP       |
| chr3_31238632_C_T   | 31238632 | 0.78 | 0.62 | 0.99 | 0.038292 | 0.21 | 0.21 | 0.21 | SNP       |
| chr3_29896772_C_T   | 29896772 | 1.26 | 1.01 | 1.57 | 0.038366 | 0.23 | 0.25 | 0.23 | SNP       |
| chr3_31240614_C_T   | 31240614 | 0.80 | 0.25 | 0.99 | 0.038617 | 0.02 | 0.01 | 0.02 | SNP       |
| chr3_31236862_C_T   | 31236862 | 0.65 | 0.42 | 0.96 | 0.038710 | 0.06 | 0.04 | 0.06 | SNP       |
| chr3_31237040_A_C   | 31237040 | 0.65 | 0.42 | 0.96 | 0.038710 | 0.06 | 0.04 | 0.06 | SNP       |
| chr3_31237254_C_T   | 31237254 | 0.65 | 0.42 | 0.96 | 0.038710 | 0.06 | 0.04 | 0.06 | SNP       |
| chr3_32014456_C_T   | 32014456 | 1.43 | 1.01 | 2.00 | 0.038965 | 0.05 | 0.07 | 0.05 | SNP       |
| chr3_29911207_G_A   | 29911207 | 0.80 | 0.65 | 0.99 | 0.039427 | 0.41 | 0.40 | 0.41 | SNP       |
| chr3_32032421_C_T   | 32032421 | 0.72 | 0.52 | 0.98 | 0.039537 | 0.11 | 0.08 | 0.12 | SNP       |
| chr3_3182338_G_A    | 3182338  | 0.79 | 0.62 | 0.99 | 0.039541 | 0.17 | 0.15 | 0.18 | SNP       |
| chr3_32603177_A_G   | 32603177 | 1.28 | 1.01 | 1.62 | 0.039594 | 0.19 | 0.19 | 0.19 | SNP       |
| chr3_29864478_G_A   | 29864478 | 1.22 | 1.01 | 1.48 | 0.039613 | 0.29 | 0.31 | 0.29 | SNP       |
| chr3_31189031_C_A   | 31189031 | 0.52 | 0.26 | 0.99 | 0.039711 | 0.02 | 0.01 | 0.03 | SNP       |
| chr3_32710695_T_G   | 32710695 | 0.74 | 0.55 | 0.98 | 0.039804 | 0.11 | 0.08 | 0.11 | SNP       |
| chr3_30226123_C_T   | 30226123 | 1.37 | 1.01 | 1.84 | 0.040458 | 0.13 | 0.14 | 0.12 | SNP       |
| chr3_31641194_C_A   | 31641194 | 1.17 | 1.01 | 1.49 | 0.040493 | 0.29 | 0.33 | 0.28 | SNP       |
| chr3_31134033_A_T   | 31134033 | 0.51 | 0.26 | 0.94 | 0.040591 | 0.02 | 0.02 | 0.03 | SNP       |
| chr3_31860156_C_T   | 31860156 | 1.43 | 1.01 | 2.00 | 0.040596 | 0.08 | 0.07 | 0.08 | SNP       |
| chr3_31864304_G_A   | 31864304 | 1.30 | 1.01 | 1.66 | 0.040676 | 0.37 | 0.39 | 0.37 | SNP       |
| chr3_32050338_G_A   | 32050338 | 1.44 | 1.01 | 2.05 | 0.040766 | 0.17 | 0.18 | 0.16 | SNP       |
| chr3_31244262_A_G   | 31244262 | 0.51 | 0.25 | 0.93 | 0.040836 | 0.02 | 0.01 | 0.03 | SNP       |
| chr3_33138677_G_A   | 33138677 | 1.21 | 1.01 | 1.45 | 0.041083 | 0.25 | 0.28 | 0.25 | SNP       |
| chr3_31202833_C_A   | 31202833 | 1.43 | 1.28 | 0.99 | 0.041160 | 0.03 | 0.02 | 0.03 | SNP       |
| chr3_32029849_G_A   | 32029849 | 0.71 | 0.51 | 0.98 | 0.041379 | 0.09 | 0.07 | 0.10 | SNP       |
| chr3_32806391_C_T   | 32806391 | 1.25 | 1.01 | 1.54 | 0.041527 | 0.45 | 0.50 | 0.43 | SNP       |
| chr3_32945843_T_C   | 32945843 | 1.83 | 1.00 | 3.21 | 0.041586 | 0.02 | 0.02 | 0.01 | SNP       |
| chr3_29944427_T_C   | 29944427 | 1.25 | 1.01 | 1.55 | 0.041863 | 0.20 | 0.21 | 0.20 | SNP       |
| chr3_31631531_G_A   | 31631531 | 1.97 | 1.00 | 3.71 | 0.041978 | 0.02 | 0.02 | 0.02 | SNP       |
| chr3_29858253_G_A   | 29858253 | 1.33 | 1.01 | 1.75 | 0.042224 | 0.15 | 0.16 | 0.14 | SNP       |
| chr3_31235644_C_T   | 31235644 | 0.83 | 0.64 | 0.99 | 0.042244 | 0.22 | 0.17 | 0.22 | SNP       |
| chr3_32340176_C_T   | 32340176 | 0.77 | 0.59 | 0.99 | 0.042664 | 0.24 | 0.21 | 0.24 | SNP       |
| chr3_32608844_A_G   | 32608844 | 1.27 | 1.01 | 1.60 | 0.042824 | 0.28 | 0.33 | 0.26 | SNP       |
| chr3_3127745_C_A    | 3127745  | 0.64 | 0.40 | 0.97 | 0.042927 | 0.05 | 0.03 | 0.03 | SNP       |
| chr3_31246969_A_G   | 31246969 | 0.72 | 0.52 | 0.98 | 0.043043 | 0.11 | 0.08 | 0.12 | SNP       |
| chr3_31113149_A_T   | 31113149 | 0.64 | 0.41 | 0.97 | 0.043176 | 0.05 | 0.03 | 0.06 | SNP       |
| chr3_32411846_G_A   | 32411846 | 1.27 | 1.01 | 1.59 | 0.043377 | 0.25 | 0.27 | 0.25 | SNP       |
| chr3_32707508_T_C   | 32707508 | 0.75 | 0.56 | 0.99 | 0.043610 | 0.10 | 0.08 | 0.11 | SNP       |
| chr3_32707569_G_A   | 32707569 | 0.75 | 0.56 | 0.99 | 0.043616 | 0.10 | 0.08 | 0.11 | SNP       |
| chr3_32603660_T_C   | 32603660 | 0.82 | 0.67 | 0.99 | 0.043631 | 0.38 | 0.37 | 0.38 | SNP       |
| chr3_32708890_A_G   | 32708890 | 0.75 | 0.56 | 0.99 | 0.043641 | 0.10 | 0.08 | 0.11 | SNP       |
| chr3_32708413_G_A   | 32708413 | 0.75 | 0.56 | 0.99 | 0.043688 | 0.11 | 0.08 | 0.11 | SNP       |
| chr3_32035427_T_C   | 32035427 | 0.72 | 0.52 | 0.98 | 0.043743 | 0.09 | 0.07 | 0.10 | SNP       |
| chr3_32412571_A_C   | 32412571 | 1.26 | 1.00 | 1.58 | 0.043756 | 0.25 | 0.27 | 0.25 | SNP       |
| chr3_29969658_C_T   | 29969658 | 0.83 | 0.70 | 0.98 | 0.043782 | 0.45 | 0.44 | 0.45 | SNP       |
| chr3_29911069_A_T   | 29911069 | 0.69 | 0.48 | 0.98 | 0.043874 | 0.09 | 0.06 | 0.09 | SNP       |
| chr3_30864927_C_T   | 30864927 | 1.45 | 1.00 | 2.06 | 0.043990 | 0.05 | 0.06 | 0.05 | SNP       |
| chr3_32707614_A_G   | 32707614 | 0.75 | 0.56 | 0.99 | 0.044021 | 0.10 | 0.08 | 0.11 | SNP       |
| chr3_32707638_C_T   | 32707638 | 0.75 | 0.56 | 0.99 | 0.044013 | 0.10 | 0.08 | 0.11 | SNP       |
| chr3_32707641_C_A   | 32707641 | 0.75 | 0.56 | 0.99 | 0.044013 | 0.10 | 0.08 | 0.11 | SNP       |
| chr3_32707740_C_T   | 32707740 | 0.75 | 0.56 | 0.99 | 0.044013 | 0.10 | 0.08 | 0.11 | SNP       |
| chr3_32707783_A_G   | 32707783 | 0.75 | 0.56 | 0.99 | 0.044013 | 0.10 | 0.08 | 0.11 | SNP       |
| chr3_32708798_C_T   | 32708798 | 0.75 | 0.56 | 0.99 | 0.044013 | 0.10 | 0.08 | 0.11 | SNP       |
| chr3_32709179_A_G   | 32709179 | 0.75 | 0.56 | 0.99 | 0.044013 | 0.10 | 0.08 | 0.11 | SNP       |
| chr3_32709586_G_A   | 32709586 | 0.75 | 0.56 | 0.99 | 0.044013 | 0.10 | 0.08 | 0.11 | SNP       |
| chr3_32709738_A_G   | 32709738 | 0.75 | 0.56 | 0.99 | 0.044013 | 0.10 | 0.08 | 0.11 | SNP       |
| chr3_31245911_G_A   | 31245911 | 0.66 | 0.43 | 0.97 | 0.044234 | 0.06 | 0.04 | 0.06 | SNP       |
| chr3_29972884_G_A   | 29972884 | 1.23 | 1.00 | 1.51 | 0.044415 | 0.28 | 0.28 | 0.28 | SNP       |
| chr3_30246811_C_G   | 30246811 | 0.79 | 0.62 | 0.99 | 0.044440 | 0.10 | 0.15 | 0.20 | SNP       |
| chr3_32321554_G_T   | 32321554 | 1.48 | 1.00 | 2.16 | 0.044524 | 0.04 | 0.05 | 0.03 | SNP       |
| chr3_32781954_A_C   | 32781954 | 0.47 | 0.21 | 0.93 | 0.044565 | 0.02 | 0.01 | 0.02 | SNP       |
| chr3_32551662_A_G   | 32551662 | 0.81 | 0.65 | 0.99 | 0.044810 | 0.39 | 0.35 | 0.40 | SNP       |
| chr3_32974081_C_T   | 32974081 | 1.19 | 1.00 | 1.41 | 0.044820 | 0.48 | 0.53 | 0.47 | SNP       |
| chr3_32411362_A_C   | 32411362 | 1.31 | 1.00 | 1.71 | 0.044869 | 0.14 | 0.14 | 0.14 | SNP       |
| chr3_32412435_G_A   | 32412435 | 1.31 | 1.00 | 1.71 | 0.044869 | 0.14 | 0.14 | 0.14 | SNP       |
| chr3_32707360_G_A   | 32707360 | 0.75 | 0.56 | 0.99 | 0.045113 | 0.10 | 0.08 | 0.11 | SNP       |
| HLA_2Hfd_DQB1_06_03 | 32627244 | 0.69 | 0.48 | 0.98 | 0.045192 | 0.08 | 0.06 | 0.09 | HLA (HLA) |
| chr3_30228879_C_T   | 30228879 | 0.78 | 0.62 | 0.99 | 0.045265 | 0.19 | 0.15 | 0.20 | SNP       |
| chr3_32373378_A_T   | 32373378 | 1.41 | 1.00 | 1.97 | 0.045343 | 0.07 | 0.10 | 0.06 | SNP       |
| chr3_29942324_C_T   | 29942324 | 0.83 | 0.69 | 1.00 | 0.045405 | 0.49 | 0.48 | 0.50 | SNP       |
| chr3_31727897_C_T   | 31727897 | 1.69 | 1.01 | 2.83 | 0.045470 | 0.12 | 0.12 | 0.12 | SNP       |
| chr3_32710221_C_T   | 32710221 | 1.20 | 1.00 | 1.44 | 0.045662 | 0.39 | 0.41 |      |           |

**Supplementary Table 3.** Association analysis of patients with GPA versus controls, adjusting for sex and genetic structure (principal components 1-4).

| Variant           | position | OR   | CI lower | CI upper | p        | MAF  | MAF cases | MAF controls | Type (SNP, HLA) |
|-------------------|----------|------|----------|----------|----------|------|-----------|--------------|-----------------|
| HLA-DPB1_D4_D1    | 33043767 | 2.97 | 2.51     | 3.54     | 3.47E-35 | 0.48 | 0.72      | 0.42         | HLA (HLA)       |
| chr6_33052950_C_T | 33052950 | 0.14 | 0.10     | 0.19     | 1.36E-34 | 0.23 | 0.05      | 0.27         | SNP             |
| chr6_33052958_C_T | 33052958 | 0.14 | 0.10     | 0.18     | 2.26E-34 | 0.23 | 0.05      | 0.27         | SNP             |
| chr6_33052986_T_C | 33052986 | 0.13 | 0.10     | 0.18     | 2.37E-34 | 0.23 | 0.05      | 0.28         | SNP             |
| chr6_33053455_C_T | 33053455 | 0.14 | 0.10     | 0.19     | 3.42E-34 | 0.23 | 0.05      | 0.28         | SNP             |
| chr6_33053728_C_T | 33053728 | 0.14 | 0.10     | 0.18     | 3.99E-34 | 0.23 | 0.05      | 0.28         | SNP             |
| chr6_33053723_T_C | 33053723 | 0.14 | 0.10     | 0.19     | 4.64E-34 | 0.23 | 0.05      | 0.28         | SNP             |
| chr6_33053468_C_T | 33053468 | 0.14 | 0.10     | 0.19     | 5.81E-34 | 0.23 | 0.05      | 0.28         | SNP             |
| chr6_33053477_G_C | 33053477 | 0.14 | 0.10     | 0.19     | 6.00E-34 | 0.23 | 0.05      | 0.28         | SNP             |
| chr6_33053399_T_C | 33053399 | 0.14 | 0.10     | 0.19     | 6.58E-34 | 0.23 | 0.05      | 0.28         | SNP             |
| chr6_33053477_G_A | 33053477 | 0.14 | 0.10     | 0.19     | 8.21E-34 | 0.23 | 0.06      | 0.28         | SNP             |
| chr6_33053682_G_A | 33053682 | 0.14 | 0.10     | 0.19     | 8.84E-34 | 0.23 | 0.06      | 0.28         | SNP             |
| chr6_33054046_T_G | 33054046 | 0.14 | 0.10     | 0.19     | 9.06E-34 | 0.23 | 0.06      | 0.28         | SNP             |
| chr6_33054047_A_G | 33054047 | 0.14 | 0.10     | 0.19     | 9.27E-34 | 0.23 | 0.06      | 0.28         | SNP             |
| chr6_33053982_G_C | 33053982 | 0.14 | 0.10     | 0.19     | 9.27E-34 | 0.23 | 0.06      | 0.28         | SNP             |
| chr6_33053871_A_G | 33053871 | 0.14 | 0.10     | 0.19     | 9.33E-34 | 0.23 | 0.06      | 0.28         | SNP             |
| chr6_33054352_G_A | 33054352 | 0.14 | 0.10     | 0.19     | 9.63E-34 | 0.23 | 0.06      | 0.28         | SNP             |
| chr6_33053772_G_A | 33053772 | 0.14 | 0.10     | 0.19     | 9.66E-34 | 0.23 | 0.06      | 0.28         | SNP             |
| chr6_33054656_A_C | 33054656 | 0.14 | 0.10     | 0.19     | 9.72E-34 | 0.23 | 0.06      | 0.28         | SNP             |
| chr6_33054675_C_G | 33054675 | 0.14 | 0.10     | 0.19     | 9.72E-34 | 0.23 | 0.06      | 0.28         | SNP             |
| chr6_33054683_A_G | 33054683 | 0.14 | 0.10     | 0.19     | 9.72E-34 | 0.23 | 0.06      | 0.28         | SNP             |
| chr6_33054687_G_A | 33054687 | 0.14 | 0.10     | 0.19     | 9.72E-34 | 0.23 | 0.06      | 0.28         | SNP             |
| chr6_33053890_G_A | 33053890 | 0.14 | 0.10     | 0.19     | 9.81E-34 | 0.23 | 0.06      | 0.28         | SNP             |
| chr6_33054152_A_G | 33054152 | 0.14 | 0.10     | 0.19     | 9.81E-34 | 0.23 | 0.06      | 0.28         | SNP             |
| chr6_33055009_C_A | 33055009 | 0.14 | 0.10     | 0.19     | 9.97E-34 | 0.23 | 0.06      | 0.28         | SNP             |
| chr6_33054711_G_C | 33054711 | 0.14 | 0.10     | 0.19     | 1.02E-33 | 0.23 | 0.06      | 0.28         | SNP             |
| chr6_33054721_C_T | 33054721 | 0.14 | 0.10     | 0.19     | 1.02E-33 | 0.23 | 0.06      | 0.28         | SNP             |
| chr6_33054149_T_C | 33054149 | 0.14 | 0.10     | 0.19     | 1.02E-33 | 0.23 | 0.06      | 0.28         | SNP             |
| chr6_33053780_T_A | 33053780 | 0.14 | 0.10     | 0.19     | 1.02E-33 | 0.23 | 0.06      | 0.28         | SNP             |
| chr6_3305457_A_G  | 3305457  | 0.14 | 0.10     | 0.19     | 1.03E-33 | 0.23 | 0.06      | 0.28         | SNP             |
| chr6_33054579_T_C | 33054579 | 0.14 | 0.10     | 0.19     | 1.03E-33 | 0.23 | 0.06      | 0.28         | SNP             |
| chr6_33054595_C_T | 33054595 | 0.14 | 0.10     | 0.19     | 1.03E-33 | 0.23 | 0.06      | 0.28         | SNP             |
| chr6_33054519_G_A | 33054519 | 0.14 | 0.10     | 0.19     | 1.03E-33 | 0.23 | 0.06      | 0.28         | SNP             |
| chr6_33054890_C_T | 33054890 | 0.14 | 0.10     | 0.19     | 1.03E-33 | 0.23 | 0.06      | 0.28         | SNP             |
| chr6_33054091_C_T | 33054091 | 0.14 | 0.10     | 0.19     | 1.04E-33 | 0.23 | 0.06      | 0.28         | SNP             |
| chr6_33054295_C_G | 33054295 | 0.14 | 0.10     | 0.19     | 1.04E-33 | 0.23 | 0.06      | 0.28         | SNP             |
| chr6_33054586_A_G | 33054586 | 0.14 | 0.10     | 0.19     | 1.06E-33 | 0.23 | 0.06      | 0.28         | SNP             |
| chr6_33054342_T_A | 33054342 | 0.14 | 0.10     | 0.19     | 1.07E-33 | 0.23 | 0.06      | 0.28         | SNP             |
| chr6_3305355_A_G  | 3305355  | 0.14 | 0.10     | 0.19     | 1.07E-33 | 0.23 | 0.06      | 0.28         | SNP             |
| chr6_33053868_A_G | 33053868 | 0.14 | 0.10     | 0.19     | 1.07E-33 | 0.23 | 0.06      | 0.28         | SNP             |
| chr6_33053789_A_G | 33053789 | 0.14 | 0.10     | 0.19     | 1.07E-33 | 0.23 | 0.06      | 0.28         | SNP             |
| chr6_33054331_T_C | 33054331 | 0.14 | 0.10     | 0.19     | 1.08E-33 | 0.23 | 0.06      | 0.28         | SNP             |
| chr6_33054550_G_A | 33054550 | 0.14 | 0.10     | 0.19     | 1.08E-33 | 0.23 | 0.06      | 0.28         | SNP             |
| chr6_33054142_G_C | 33054142 | 0.14 | 0.10     | 0.19     | 1.08E-33 | 0.23 | 0.06      | 0.28         | SNP             |
| chr6_33053968_T_A | 33053968 | 0.14 | 0.10     | 0.19     | 1.08E-33 | 0.23 | 0.06      | 0.28         | SNP             |
| chr6_33053971_T_C | 33053971 | 0.14 | 0.10     | 0.19     | 1.08E-33 | 0.23 | 0.06      | 0.28         | SNP             |
| chr6_33054141_T_C | 33054141 | 0.14 | 0.10     | 0.19     | 1.11E-33 | 0.23 | 0.06      | 0.28         | SNP             |
| chr6_33054148_C_T | 33054148 | 0.14 | 0.10     | 0.19     | 1.11E-33 | 0.23 | 0.06      | 0.28         | SNP             |
| chr6_33054400_T_C | 33054400 | 0.14 | 0.10     | 0.19     | 1.12E-33 | 0.23 | 0.06      | 0.28         | SNP             |
| chr6_33054404_A_G | 33054404 | 0.14 | 0.10     | 0.19     | 1.12E-33 | 0.23 | 0.06      | 0.28         | SNP             |
| chr6_33054410_A_G | 33054410 | 0.14 | 0.10     | 0.19     | 1.12E-33 | 0.23 | 0.06      | 0.28         | SNP             |
| chr6_33054057_G_A | 33054057 | 0.14 | 0.10     | 0.19     | 1.12E-33 | 0.23 | 0.06      | 0.28         | SNP             |
| chr6_33054386_C_T | 33054386 | 0.14 | 0.10     | 0.19     | 1.14E-33 | 0.23 | 0.06      | 0.28         | SNP             |
| chr6_33054302_T_C | 33054302 | 0.14 | 0.10     | 0.19     | 1.15E-33 | 0.23 | 0.06      | 0.28         | SNP             |
| chr6_33054807_A_G | 33054807 | 0.14 | 0.10     | 0.19     | 1.15E-33 | 0.23 | 0.06      | 0.28         | SNP             |
| chr6_33054381_T_C | 33054381 | 0.14 | 0.10     | 0.19     | 1.16E-33 | 0.23 | 0.06      | 0.28         | SNP             |
| chr6_3305471_G_C  | 3305471  | 0.14 | 0.10     | 0.19     | 1.17E-33 | 0.23 | 0.06      | 0.28         | SNP             |
| chr6_33053902_A_G | 33053902 | 0.14 | 0.10     | 0.19     | 1.18E-33 | 0.23 | 0.06      | 0.28         | SNP             |
| chr6_33054373_C_T | 33054373 | 0.14 | 0.10     | 0.19     | 1.22E-33 | 0.23 | 0.06      | 0.28         | SNP             |
| chr6_33054325_G_C | 33054325 | 0.14 | 0.10     | 0.19     | 1.24E-33 | 0.23 | 0.06      | 0.28         | SNP             |
| chr6_33054155_C_T | 33054155 | 0.14 | 0.10     | 0.19     | 1.24E-33 | 0.23 | 0.06      | 0.28         | SNP             |
| chr6_33054156_A_G | 33054156 | 0.14 | 0.10     | 0.19     | 1.26E-33 | 0.23 | 0.06      | 0.28         | SNP             |
| chr6_33054268_C_A | 33054268 | 0.14 | 0.10     | 0.19     | 1.28E-33 | 0.23 | 0.06      | 0.28         | SNP             |
| chr6_33053906_G_T | 33053906 | 0.14 | 0.10     | 0.19     | 1.29E-33 | 0.23 | 0.06      | 0.28         | SNP             |
| chr6_33054413_T_G | 33054413 | 0.14 | 0.10     | 0.19     | 1.36E-33 | 0.23 | 0.06      | 0.28         | SNP             |
| chr6_33054414_T_A | 33054414 | 0.14 | 0.10     | 0.19     | 1.36E-33 | 0.23 | 0.06      | 0.28         | SNP             |
| chr6_33054231_C_T | 33054231 | 0.14 | 0.10     | 0.19     | 1.45E-33 | 0.23 | 0.06      | 0.28         | SNP             |
| chr6_33054280_T_C | 33054280 | 0.14 | 0.10     | 0.20     | 1.85E-33 | 0.23 | 0.06      | 0.28         | SNP             |
| chr6_33054281_G_A | 33054281 | 0.14 | 0.10     | 0.20     | 1.85E-33 | 0.23 | 0.06      | 0.28         | SNP             |
| chr6_33054332_A_C | 33054332 | 0.15 | 0.11     | 0.21     | 1.66E-33 | 0.22 | 0.06      | 0.28         | SNP             |
| chr6_33050125_G_A | 33050125 | 0.14 | 0.10     | 0.19     | 1.64E-33 | 0.22 | 0.05      | 0.27         | SNP             |
| chr6_33055047_A_G | 33055047 | 0.15 | 0.10     | 0.20     | 5.67E-33 | 0.22 | 0.06      | 0.28         | SNP             |
| chr6_33050118_C_T | 33050118 | 0.14 | 0.10     | 0.19     | 6.11E-33 | 0.22 | 0.05      | 0.27         | SNP             |
| chr6_33050148_T_C | 33050148 | 0.14 | 0.10     | 0.19     | 6.99E-33 | 0.22 | 0.05      | 0.27         | SNP             |
| chr6_33049211_C_T | 33049211 | 0.15 | 0.11     | 0.21     | 8.70E-33 | 0.22 | 0.06      | 0.28         | SNP             |
| chr6_3305167_A_G  | 3305167  | 0.15 | 0.11     | 0.20     | 1.22E-32 | 0.22 | 0.06      | 0.27         | SNP             |
| chr6_33050078_A_G | 33050078 | 0.15 | 0.11     | 0.20     | 1.43E-32 | 0.22 | 0.06      | 0.27         | SNP             |
| chr6_33050089_G_A | 33050089 | 0.15 | 0.11     | 0.20     | 1.48E-32 | 0.22 | 0.06      | 0.27         | SNP             |
| chr6_33050079_C_G | 33050079 | 0.15 | 0.11     | 0.20     | 1.50E-32 | 0.22 | 0.06      | 0.27         | SNP             |
| chr6_33050107_G_A | 33050107 | 0.15 | 0.11     | 0.20     | 1.58E-32 | 0.22 | 0.06      | 0.27         | SNP             |
| chr6_33050499_A_G | 33050499 | 0.14 | 0.10     | 0.19     | 1.79E-32 | 0.22 | 0.05      | 0.27         | SNP             |
| chr6_33050473_G_C | 33050473 | 0.15 | 0.10     | 0.20     | 1.98E-32 | 0.22 | 0.05      | 0.27         | SNP             |
| chr6_33053270_T_A | 33053270 | 0.13 | 0.09     | 0.18     | 2.37E-32 | 0.23 | 0.05      | 0.28         | SNP             |
| chr6_33050024_C_A | 33050024 | 0.15 | 0.11     | 0.20     | 2.73E-32 | 0.22 | 0.06      | 0.27         | SNP             |
| chr6_33050168_C_A | 33050168 | 0.15 | 0.11     | 0.20     | 3.10E-32 | 0.22 | 0.06      | 0.27         | SNP             |
| chr6_33050045_T_C | 33050045 | 0.15 | 0.11     | 0.20     | 3.23E-32 | 0.22 | 0.06      | 0.27         | SNP             |
| chr6_33050279_A_G | 33050279 | 0.15 | 0.11     | 0.21     | 3.26E-32 | 0.22 | 0.06      | 0.27         | SNP             |
| chr6_33050179_A_G | 33050179 | 0.15 | 0.11     | 0.20     | 3.48E-32 | 0.22 | 0.06      | 0.27         | SNP             |
| chr6_33053271_T_C | 33053271 | 0.13 | 0.09     | 0.18     | 3.81E-32 | 0.23 | 0.05      | 0.28         | SNP             |
| chr6_33050185_C_A | 33050185 | 0.15 | 0.11     | 0.20     | 3.97E-32 | 0.22 | 0.06      | 0.27         | SNP             |
| chr6_33050196_T_C | 33050196 | 0.15 | 0.11     | 0.20     | 3.97E-32 | 0.22 | 0.06      | 0.27         | SNP             |
| chr6_33050525_T_C | 33050525 | 0.14 | 0.10     | 0.20     | 5.34E-32 | 0.22 | 0.05      | 0.27         | SNP             |
| chr6_33050303_C_T | 33050303 | 0.16 | 0.11     | 0.21     | 5.97E-32 | 0.22 | 0.06      | 0.27         | SNP             |
| chr6_33050526_C_T | 33050526 | 0.14 | 0.10     | 0.20     | 6.26E-32 | 0.22 | 0.05      | 0.27         | SNP             |
| chr6_33050196_G_C | 33050196 | 0.16 | 0.11     | 0.21     | 6.36E-32 | 0.22 | 0.06      | 0.27         | SNP             |
| chr6_33049979_A_G | 33049979 | 0.16 | 0.12     | 0.21     | 8.29E-32 | 0.23 | 0.06      | 0.27         | SNP             |
| chr6_33050129_A_G | 33050129 | 0.14 | 0.10     | 0.20     | 8.49E-32 | 0.23 | 0.05      | 0.28         | SNP             |
| chr6_33050521_G_T | 33050521 | 0.15 | 0.10     | 0.20     | 9.38E-32 | 0.22 | 0.05      | 0.27         | SNP             |
| chr6_33049983_C_T | 33049983 | 0.16 | 0.12     | 0.21     | 9.52E-32 | 0.23 | 0.06      | 0.27         | SNP             |
| chr6_33051248_A_G | 33051248 | 0.13 | 0.09     | 0.18     | 9.54E-32 | 0.23 | 0.05      | 0.28         | SNP             |
| chr6_33053252_G_A | 33053252 | 0.13 | 0.09     | 0.18     | 9.83E-32 | 0.23 | 0.05      | 0.28         | SNP             |
| chr6_33054659_A_G | 33054659 | 0.15 | 0.11     | 0.21     | 4.33E-31 | 0.22 | 0.06      | 0.26         | SNP             |
| chr6_33047031_T_C | 33047031 | 0.16 | 0.11     | 0.21     | 4.91E-31 | 0.22 | 0.06      | 0.26         | SNP             |
| chr6_33055079_A_G | 33055079 | 0.16 | 0.11     | 0.21     | 4.61E-30 | 0.22 | 0.06      | 0.26         | SNP             |
| chr6_33050232_T_C | 33050232 | 0.17 | 0.12     | 0.22     | 3.52E-29 | 0.21 | 0.06      | 0.25         | SNP             |
| chr6_33050132_G_A | 33050132 | 0.17 | 0.12     | 0.22     | 3.44E-29 | 0.21 | 0.06      | 0.25         | SNP             |
| chr6_33048459_T_G | 33048459 | 0.16 | 0.11     | 0.22     | 1.23E-28 | 0.19 | 0.05      | 0.23         | SNP             |
| chr6_33048461_T_A | 33048461 | 0.16 | 0.11     | 0.22     | 1.46E-28 | 0.19 | 0.05      | 0.23         | SNP             |
| chr6_33048457_A_G | 33048457 | 0.16 | 0.11     | 0.22     | 2.05E-28 | 0.19 | 0.05      | 0.23         | SNP             |
| chr6_33071754_C_A | 33071754 | 0.15 | 0.10     | 0.21     | 1.10E-26 | 0.19 |           |              |                 |

Table with 10 columns: Chromosome, Position (bp), RefSeq ID, R-squared, P-value, and SNP ID. The table lists genomic data for various SNPs across chromosomes 3 to 10, including coordinates and associated identifiers.

Table with 10 columns: Chromosome, Position (bp), RefSeq ID, R-squared, P-value, and SNP ID. This table continues the list of SNPs from the previous table, covering positions from approximately 140,000,000 to 140,000,000 on chromosome 10.

|                     |           |      |      |      |          |      |      |      |           |
|---------------------|-----------|------|------|------|----------|------|------|------|-----------|
| chr6_33048975_G_A   | 33048975  | 0.16 | 0.08 | 0.30 | 7.33E-08 | 0.05 | 0.01 | 0.06 | SNP       |
| chr6_32978587_C_A   | 32978587  | 0.25 | 0.14 | 0.40 | 7.74E-08 | 0.06 | 0.02 | 0.07 | SNP       |
| chr6_33053577_G_A   | 33053577  | 0.16 | 0.08 | 0.30 | 7.86E-08 | 0.05 | 0.01 | 0.06 | SNP       |
| chr6_33054378_G_A   | 33054378  | 0.16 | 0.08 | 0.30 | 7.96E-08 | 0.05 | 0.01 | 0.06 | SNP       |
| chr6_33054559_T_C   | 33054559  | 0.16 | 0.08 | 0.30 | 7.96E-08 | 0.05 | 0.01 | 0.06 | SNP       |
| chr6_33134392_G_A   | 33134392  | 1.57 | 1.33 | 1.85 | 7.92E-08 | 0.40 | 0.49 | 0.38 | SNP       |
| chr6_33048354_A_T   | 33048354  | 0.18 | 0.09 | 0.32 | 8.72E-08 | 0.05 | 0.01 | 0.06 | SNP       |
| chr6_33041173_T_C   | 33041173  | 0.18 | 0.09 | 0.32 | 9.06E-08 | 0.05 | 0.01 | 0.06 | SNP       |
| chr6_33033274_T_C   | 33033274  | 0.42 | 0.30 | 0.57 | 9.55E-08 | 0.12 | 0.06 | 0.13 | SNP       |
| chr6_33041734_T_C   | 33041734  | 0.42 | 0.30 | 0.57 | 1.20E-07 | 0.11 | 0.05 | 0.13 | SNP       |
| HLA_2F_H08_D1_D1    | 33045699  | 0.15 | 0.07 | 0.29 | 1.33E-07 | 0.05 | 0.01 | 0.06 | HLA (HLA) |
| chr6_33045699_T_C   | 33045699  | 0.15 | 0.07 | 0.29 | 1.41E-07 | 0.05 | 0.01 | 0.06 | SNP       |
| chr6_33050083_C_A   | 33050083  | 0.15 | 0.07 | 0.29 | 1.41E-07 | 0.05 | 0.01 | 0.06 | SNP       |
| chr6_33255317_C_T   | 33255317  | 0.27 | 0.25 | 0.35 | 1.47E-07 | 0.09 | 0.05 | 0.10 | SNP       |
| chr6_32376019_G_T   | 32376019  | 0.41 | 0.29 | 0.57 | 1.86E-07 | 0.10 | 0.05 | 0.11 | SNP       |
| chr6_33144466_C_A   | 33144466  | 0.16 | 0.07 | 0.30 | 2.20E-07 | 0.05 | 0.01 | 0.06 | SNP       |
| chr6_33158912_G_A   | 33158912  | 0.16 | 0.07 | 0.30 | 2.20E-07 | 0.05 | 0.01 | 0.06 | SNP       |
| chr6_33134102_C_T   | 33134102  | 1.55 | 1.31 | 1.83 | 2.21E-07 | 0.41 | 0.49 | 0.38 | SNP       |
| chr6_33138015_T_C   | 33138015  | 0.16 | 0.07 | 0.30 | 2.34E-07 | 0.05 | 0.01 | 0.06 | SNP       |
| chr6_33125180_C_A   | 33125180  | 0.16 | 0.07 | 0.30 | 2.36E-07 | 0.05 | 0.01 | 0.06 | SNP       |
| chr6_33136575_T_C   | 33136575  | 1.52 | 1.29 | 1.79 | 4.43E-07 | 0.43 | 0.51 | 0.41 | SNP       |
| chr6_33132931_T_C   | 33132931  | 1.64 | 1.35 | 1.99 | 4.68E-07 | 0.41 | 0.50 | 0.39 | SNP       |
| chr6_331609216_T_G  | 331609216 | 0.56 | 0.45 | 0.70 | 4.73E-07 | 0.49 | 0.40 | 0.52 | SNP       |
| chr6_33132314_G_A   | 33132314  | 0.15 | 0.07 | 0.29 | 4.99E-07 | 0.05 | 0.01 | 0.06 | SNP       |
| chr6_32627777_C_T   | 32627777  | 0.43 | 0.31 | 0.59 | 5.17E-07 | 0.14 | 0.07 | 0.15 | SNP       |
| chr6_33096003_G_C   | 33096003  | 0.62 | 0.51 | 0.75 | 6.23E-07 | 0.23 | 0.35 | 0.45 | SNP       |
| chr6_33131734_G_A   | 33131734  | 1.64 | 1.35 | 1.99 | 6.92E-07 | 0.41 | 0.51 | 0.39 | SNP       |
| chr6_32609207_T_C   | 32609207  | 0.57 | 0.46 | 0.71 | 6.99E-07 | 0.50 | 0.41 | 0.52 | SNP       |
| chr6_33122365_T_C   | 33122365  | 0.15 | 0.07 | 0.29 | 7.26E-07 | 0.05 | 0.01 | 0.06 | SNP       |
| chr6_33137570_C_T   | 33137570  | 0.21 | 0.10 | 0.37 | 8.15E-07 | 0.05 | 0.01 | 0.06 | SNP       |
| chr6_33158898_C_T   | 33158898  | 0.21 | 0.11 | 0.37 | 8.37E-07 | 0.05 | 0.01 | 0.06 | SNP       |
| chr6_33138021_G_A   | 33138021  | 0.11 | 0.13 | 0.25 | 9.33E-07 | 0.05 | 0.01 | 0.06 | SNP       |
| chr6_32628953_G_C   | 32628953  | 0.57 | 0.46 | 0.72 | 1.06E-06 | 0.48 | 0.39 | 0.50 | SNP       |
| chr6_33160906_G_T   | 33160906  | 0.17 | 0.08 | 0.33 | 1.21E-06 | 0.05 | 0.01 | 0.06 | SNP       |
| chr6_33095009_G_C   | 33095009  | 0.63 | 0.53 | 0.76 | 1.68E-06 | 0.41 | 0.35 | 0.44 | SNP       |
| chr6_33079626_T_C   | 33079626  | 0.18 | 0.08 | 0.35 | 2.20E-06 | 0.05 | 0.01 | 0.06 | SNP       |
| chr6_33045272_C_A   | 33045272  | 0.60 | 0.48 | 0.74 | 2.32E-06 | 0.22 | 0.15 | 0.25 | SNP       |
| chr6_32627494_T_C   | 32627494  | 1.67 | 1.35 | 2.08 | 3.04E-06 | 0.25 | 0.34 | 0.23 | SNP       |
| chr6_32608880_G_A   | 32608880  | 1.69 | 1.35 | 2.11 | 3.35E-06 | 0.24 | 0.42 | 0.31 | SNP       |
| chr6_32410691_G_A   | 32410691  | 0.50 | 0.37 | 0.66 | 3.37E-06 | 0.22 | 0.17 | 0.23 | SNP       |
| chr6_32628967_T_C   | 32628967  | 0.54 | 0.47 | 0.74 | 3.60E-06 | 0.48 | 0.40 | 0.51 | SNP       |
| chr6_3307193_T_C    | 3307193   | 1.68 | 1.35 | 2.10 | 3.79E-06 | 0.23 | 0.43 | 0.32 | SNP       |
| HLA_2F_H08_D1_D3    | 33043767  | 0.37 | 0.23 | 0.55 | 4.18E-06 | 0.27 | 0.03 | 0.08 | HLA (HLA) |
| chr6_32412809_T_A   | 32412809  | 0.51 | 0.38 | 0.68 | 4.93E-06 | 0.22 | 0.17 | 0.23 | SNP       |
| chr6_32412592_G_A   | 32412592  | 0.52 | 0.38 | 0.68 | 5.01E-06 | 0.22 | 0.17 | 0.23 | SNP       |
| chr6_32409060_G_A   | 32409060  | 0.50 | 0.37 | 0.67 | 5.10E-06 | 0.21 | 0.17 | 0.23 | SNP       |
| chr6_32411908_T_C   | 32411908  | 0.59 | 0.47 | 0.74 | 5.30E-06 | 0.47 | 0.39 | 0.49 | SNP       |
| chr6_32411307_C_T   | 32411307  | 0.51 | 0.38 | 0.68 | 5.60E-06 | 0.22 | 0.17 | 0.23 | SNP       |
| chr6_32412566_T_A   | 32412566  | 0.51 | 0.38 | 0.68 | 5.60E-06 | 0.22 | 0.17 | 0.23 | SNP       |
| chr6_32406701_G_A   | 32406701  | 0.57 | 0.44 | 0.72 | 5.67E-06 | 0.17 | 0.11 | 0.18 | SNP       |
| chr6_33137727_T_C   | 33137727  | 1.44 | 1.24 | 2.11 | 5.86E-06 | 0.42 | 0.50 | 0.40 | SNP       |
| chr6_32406611_C_A   | 32406611  | 0.51 | 0.38 | 0.68 | 6.07E-06 | 0.22 | 0.17 | 0.23 | SNP       |
| chr6_32408842_G_A   | 32408842  | 0.51 | 0.38 | 0.68 | 6.40E-06 | 0.22 | 0.17 | 0.23 | SNP       |
| chr6_32411376_G_A   | 32411376  | 0.51 | 0.38 | 0.68 | 6.86E-06 | 0.22 | 0.17 | 0.23 | SNP       |
| chr6_32611723_T_G   | 32611723  | 0.60 | 0.48 | 0.75 | 7.16E-06 | 0.47 | 0.39 | 0.49 | SNP       |
| chr6_32501459_T_C   | 32501459  | 0.63 | 0.51 | 0.77 | 7.24E-06 | 0.39 | 0.32 | 0.41 | SNP       |
| chr6_32410215_T_C   | 32410215  | 0.51 | 0.38 | 0.68 | 7.32E-06 | 0.22 | 0.17 | 0.23 | SNP       |
| chr6_32501522_A_G   | 32501522  | 1.76 | 1.37 | 2.25 | 7.78E-06 | 0.24 | 0.29 | 0.23 | SNP       |
| chr6_33384473_C_T   | 33384473  | 1.97 | 1.46 | 2.66 | 7.85E-06 | 0.06 | 0.11 | 0.05 | SNP       |
| chr6_32511215_T_C   | 32511215  | 1.62 | 1.38 | 2.09 | 8.29E-06 | 0.27 | 0.17 | 0.23 | SNP       |
| chr6_32521117_T_C   | 32521117  | 0.63 | 0.51 | 0.77 | 8.52E-06 | 0.48 | 0.40 | 0.51 | SNP       |
| chr6_32559709_C_T   | 32559709  | 0.63 | 0.51 | 0.77 | 8.57E-06 | 0.44 | 0.37 | 0.46 | SNP       |
| chr6_33032029_G_C   | 33032029  | 0.65 | 0.50 | 0.82 | 8.61E-06 | 0.31 | 0.25 | 0.29 | SNP       |
| HLA_2F_H08_C_07_D1  | 31236526  | 2.00 | 1.47 | 2.71 | 8.98E-06 | 0.14 | 0.17 | 0.14 | HLA (HLA) |
| chr6_32610769_C_A   | 32610769  | 0.59 | 0.46 | 0.74 | 9.19E-06 | 0.33 | 0.27 | 0.34 | SNP       |
| chr6_33215080_G_A   | 33215080  | 0.16 | 0.07 | 0.29 | 1.02E-05 | 0.05 | 0.01 | 0.06 | SNP       |
| chr6_33039804_C_T   | 33039804  | 1.50 | 1.25 | 1.79 | 1.05E-05 | 0.21 | 0.28 | 0.20 | SNP       |
| chr6_32559708_G_A   | 32559708  | 1.68 | 1.34 | 2.12 | 1.06E-05 | 0.28 | 0.36 | 0.25 | SNP       |
| chr6_33033255_T_C   | 33033255  | 0.63 | 0.51 | 0.77 | 1.11E-05 | 0.43 | 0.31 | 0.39 | SNP       |
| chr6_32628030_G_A   | 32628030  | 1.55 | 1.27 | 1.88 | 1.11E-05 | 0.43 | 0.50 | 0.41 | SNP       |
| chr6_32623509_T_C   | 32623509  | 0.25 | 0.13 | 0.45 | 1.42E-05 | 0.04 | 0.01 | 0.05 | SNP       |
| chr6_32603488_G_C   | 32603488  | 0.59 | 0.47 | 0.74 | 1.44E-05 | 0.27 | 0.19 | 0.29 | SNP       |
| chr6_32627833_A_G   | 32627833  | 1.53 | 1.26 | 1.86 | 1.53E-05 | 0.42 | 0.49 | 0.40 | SNP       |
| chr6_33095890_A_T   | 33095890  | 0.22 | 0.10 | 0.42 | 1.75E-05 | 0.04 | 0.01 | 0.05 | SNP       |
| chr6_32612003_T_C   | 32612003  | 0.63 | 0.49 | 0.77 | 1.89E-05 | 0.47 | 0.33 | 0.49 | SNP       |
| chr6_33238869_C_T   | 33238869  | 1.78 | 1.36 | 2.22 | 2.02E-05 | 0.09 | 0.12 | 0.08 | SNP       |
| chr6_32604538_G_A   | 32604538  | 1.64 | 1.31 | 2.06 | 2.08E-05 | 0.33 | 0.41 | 0.31 | SNP       |
| chr6_32501296_G_A   | 32501296  | 0.65 | 0.53 | 0.79 | 2.09E-05 | 0.38 | 0.31 | 0.40 | SNP       |
| chr6_33044795_C_T   | 33044795  | 2.17 | 1.51 | 3.10 | 2.22E-05 | 0.45 | 0.08 | 0.03 | SNP       |
| chr6_32628765_C_T   | 32628765  | 1.53 | 1.26 | 1.86 | 2.33E-05 | 0.40 | 0.47 | 0.38 | SNP       |
| chr6_32611725_G_A   | 32611725  | 0.62 | 0.49 | 0.77 | 2.37E-05 | 0.46 | 0.39 | 0.49 | SNP       |
| chr6_32501301_G_C   | 32501301  | 0.65 | 0.51 | 0.79 | 2.37E-05 | 0.38 | 0.31 | 0.40 | SNP       |
| chr6_33095584_G_C   | 33095584  | 1.67 | 1.31 | 2.11 | 2.46E-05 | 0.11 | 0.15 | 0.10 | SNP       |
| chr6_32610704_C_T   | 32610704  | 0.60 | 0.48 | 0.76 | 2.49E-05 | 0.32 | 0.27 | 0.34 | SNP       |
| chr6_33123505_G_A   | 33123505  | 1.72 | 1.34 | 2.22 | 2.58E-05 | 0.24 | 0.24 | 0.21 | SNP       |
| chr6_32628439_G_A   | 32628439  | 1.52 | 1.25 | 1.85 | 2.61E-05 | 0.40 | 0.48 | 0.39 | SNP       |
| HLA_2F_H08_D1_D2    | 33043767  | 0.52 | 0.38 | 0.70 | 2.64E-05 | 0.11 | 0.06 | 0.12 | HLA (HLA) |
| chr6_32628571_C_T   | 32628571  | 1.61 | 1.29 | 2.00 | 2.75E-05 | 0.24 | 0.30 | 0.21 | SNP       |
| chr6_33123869_T_C   | 33123869  | 1.71 | 1.33 | 2.20 | 2.77E-05 | 0.22 | 0.24 | 0.21 | SNP       |
| chr6_32521951_A_C   | 32521951  | 0.64 | 0.52 | 0.79 | 2.82E-05 | 0.37 | 0.30 | 0.39 | SNP       |
| chr6_32628916_G_A   | 32628916  | 1.57 | 1.27 | 1.94 | 2.85E-05 | 0.44 | 0.34 | 0.32 | SNP       |
| chr6_32553418_T_G   | 32553418  | 0.64 | 0.51 | 0.79 | 2.87E-05 | 0.40 | 0.34 | 0.42 | SNP       |
| chr6_32612050_T_A   | 32612050  | 0.63 | 0.50 | 0.78 | 2.94E-05 | 0.46 | 0.39 | 0.49 | SNP       |
| chr6_32636040_C_T   | 32636040  | 0.60 | 0.47 | 0.76 | 2.99E-05 | 0.31 | 0.25 | 0.32 | SNP       |
| chr6_32628941_G_C   | 32628941  | 1.58 | 1.27 | 1.95 | 3.00E-05 | 0.24 | 0.31 | 0.22 | SNP       |
| chr6_32627777_G_C   | 32627777  | 1.56 | 1.27 | 1.92 | 3.08E-05 | 0.24 | 0.32 | 0.22 | SNP       |
| chr6_32502995_G_A   | 32502995  | 0.66 | 0.54 | 0.80 | 3.15E-05 | 0.38 | 0.31 | 0.39 | SNP       |
| chr6_32636289_T_C   | 32636289  | 1.58 | 1.27 | 1.96 | 3.30E-05 | 0.24 | 0.31 | 0.22 | SNP       |
| chr6_32408735_A_C   | 32408735  | 0.63 | 0.51 | 0.78 | 3.52E-05 | 0.33 | 0.26 | 0.35 | SNP       |
| chr6_32628605_T_C   | 32628605  | 1.59 | 1.27 | 1.98 | 3.63E-05 | 0.27 | 0.35 | 0.26 | SNP       |
| chr6_32559714_G_A   | 32559714  | 0.65 | 0.52 | 0.79 | 3.77E-05 | 0.45 | 0.38 | 0.47 | SNP       |
| chr6_32628506_C_A   | 32628506  | 1.58 | 1.27 | 1.97 | 3.96E-05 | 0.23 | 0.30 | 0.21 | SNP       |
| chr6_32624007_G_A   | 32624007  | 1.55 | 1.26 | 1.92 | 4.18E-05 | 0.24 | 0.31 | 0.22 | SNP       |
| HLA_2F_H08_D1_D3_D2 | 32546552  | 0.36 | 0.21 | 0.57 | 4.27E-05 | 0.05 | 0.02 | 0.06 | HLA (HLA) |
| chr6_32629639_T_C   | 32629639  | 1.55 | 1.26 | 1.91 | 4.28E-05 | 0.24 | 0.32 | 0.22 | SNP       |
| chr6_32501211_C_T   | 32501211  | 0.66 | 0.54 | 0.80 | 4.29E-05 | 0.43 | 0.32 | 0.40 | SNP       |
| chr6_32187202_T_C   | 32187202  | 1.52 | 1.25 | 1.87 | 4.35E-05 | 0.43 | 0.49 | 0.42 | SNP       |
| chr6_32629398_G_C   | 32629398  | 1.55 | 1.25 | 1.91 | 4.49E-05 | 0.24 | 0.32 | 0.23 | SNP       |
| chr6_33048119_C_T   | 33048119  | 2.05 | 1.45 | 2.40 | 4.62E-05 | 0.04 | 0.07 | 0.03 | SNP       |
| chr6_32607031_G_T   | 32607031  | 1.60 | 1.27 | 2.00 | 4.67E-05 | 0.32 | 0.42 | 0.30 | SNP       |
| chr6_32634556_G_A   | 32634556  | 1.57 | 1.26 | 1.94 | 4.68E-05 | 0.25 |      |      |           |

|                   |          |      |      |      |          |      |      |      |     |
|-------------------|----------|------|------|------|----------|------|------|------|-----|
| chr6_33603277_G_T | 33603277 | 0.40 | 0.24 | 0.62 | 9.11E-05 | 0.05 | 0.03 | 0.06 | SNP |
| chr6_32636494_C   | 32636494 | 0.65 | 0.52 | 0.80 | 9.35E-05 | 0.42 | 0.34 | 0.44 | SNP |
| chr6_32634646_T_C | 32634646 | 1.52 | 1.23 | 1.87 | 9.39E-05 | 0.24 | 0.31 | 0.22 | SNP |
| chr6_32606376_T_C | 32606376 | 0.39 | 0.24 | 0.61 | 9.47E-05 | 0.05 | 0.02 | 0.06 | SNP |
| chr6_32633330_G_A | 32633330 | 1.55 | 1.24 | 1.93 | 9.45E-05 | 0.23 | 0.30 | 0.22 | SNP |
| chr6_32628787_C_T | 32628787 | 1.54 | 1.24 | 1.91 | 9.65E-05 | 0.24 | 0.31 | 0.22 | SNP |
| chr6_32609009_T_G | 32609009 | 0.40 | 0.25 | 0.62 | 9.66E-05 | 0.05 | 0.03 | 0.06 | SNP |
| chr6_32606682_C_G | 32606682 | 0.40 | 0.25 | 0.62 | 9.86E-05 | 0.05 | 0.03 | 0.06 | SNP |
| chr6_32804570_G_A | 32804570 | 1.44 | 1.20 | 1.74 | 0.00010  | 0.37 | 0.45 | 0.35 | SNP |
| chr6_32628617_A_C | 32628617 | 1.53 | 1.24 | 1.90 | 0.00010  | 0.24 | 0.31 | 0.22 | SNP |
| chr6_32606691_T_G | 32606691 | 0.40 | 0.25 | 0.62 | 0.00010  | 0.05 | 0.03 | 0.06 | SNP |
| chr6_32609047_C_T | 32609047 | 0.40 | 0.25 | 0.62 | 0.00010  | 0.05 | 0.03 | 0.06 | SNP |
| chr6_32603896_T_C | 32603896 | 0.40 | 0.25 | 0.62 | 0.00010  | 0.05 | 0.03 | 0.06 | SNP |
| chr6_32604166_A_G | 32604166 | 0.40 | 0.25 | 0.62 | 0.00011  | 0.05 | 0.03 | 0.06 | SNP |
| chr6_32406412_C_G | 32406412 | 0.65 | 0.52 | 0.80 | 0.00011  | 0.32 | 0.25 | 0.34 | SNP |
| chr6_32609312_C_A | 32609312 | 0.64 | 0.51 | 0.80 | 0.00011  | 0.46 | 0.38 | 0.48 | SNP |
| chr6_32441129_G_A | 32441129 | 0.40 | 0.25 | 0.62 | 0.00011  | 0.05 | 0.03 | 0.06 | SNP |
| chr6_31325529_C_T | 31325529 | 1.66 | 1.28 | 2.14 | 0.00011  | 0.33 | 0.36 | 0.32 | SNP |
| chr6_31325521_C_G | 31325521 | 1.66 | 1.28 | 2.14 | 0.00011  | 0.33 | 0.36 | 0.32 | SNP |
| chr6_32441046_G_A | 32441046 | 0.40 | 0.25 | 0.62 | 0.00011  | 0.05 | 0.03 | 0.06 | SNP |
| chr6_32520774_C_T | 32520774 | 1.53 | 1.24 | 1.91 | 0.00011  | 0.31 | 0.39 | 0.29 | SNP |
| chr6_32611964_C_T | 32611964 | 1.56 | 1.25 | 1.96 | 0.00011  | 0.29 | 0.36 | 0.27 | SNP |
| chr6_32609453_C_T | 32609453 | 1.55 | 1.24 | 1.93 | 0.00011  | 0.34 | 0.42 | 0.32 | SNP |
| chr6_32608435_T_C | 32608435 | 0.40 | 0.25 | 0.63 | 0.00012  | 0.05 | 0.03 | 0.06 | SNP |
| chr6_32559045_T_C | 32559045 | 0.68 | 0.55 | 0.82 | 0.00012  | 0.43 | 0.37 | 0.44 | SNP |
| chr6_32409484_C_T | 32409484 | 0.65 | 0.52 | 0.81 | 0.00012  | 0.32 | 0.25 | 0.34 | SNP |
| chr6_32633767_G_T | 32633767 | 1.51 | 1.22 | 1.86 | 0.00012  | 0.24 | 0.31 | 0.22 | SNP |
| chr6_32628606_C_A | 32628606 | 0.40 | 0.25 | 0.63 | 0.00012  | 0.05 | 0.03 | 0.06 | SNP |
| chr6_32592920_G_A | 32592920 | 0.63 | 0.50 | 0.80 | 0.00013  | 0.24 | 0.27 | 0.34 | SNP |
| chr6_32634545_C_A | 32634545 | 1.51 | 1.22 | 1.86 | 0.00013  | 0.24 | 0.31 | 0.22 | SNP |
| chr6_32629549_G_A | 32629549 | 1.51 | 1.22 | 1.86 | 0.00013  | 0.24 | 0.31 | 0.23 | SNP |
| chr6_32611450_T_G | 32611450 | 0.65 | 0.52 | 0.81 | 0.00013  | 0.47 | 0.40 | 0.49 | SNP |
| chr6_32628737_G_A | 32628737 | 0.65 | 0.52 | 0.81 | 0.00013  | 0.47 | 0.39 | 0.49 | SNP |
| chr6_32628776_A_C | 32628776 | 0.65 | 0.52 | 0.81 | 0.00013  | 0.47 | 0.40 | 0.49 | SNP |
| chr6_32634091_G_C | 32634091 | 1.51 | 1.22 | 1.87 | 0.00013  | 0.24 | 0.31 | 0.22 | SNP |
| chr6_32442703_G_A | 32442703 | 0.39 | 0.24 | 0.62 | 0.00013  | 0.05 | 0.02 | 0.06 | SNP |
| chr6_32605705_T_G | 32605705 | 0.66 | 0.53 | 0.81 | 0.00014  | 0.45 | 0.38 | 0.47 | SNP |
| chr6_32634967_T_A | 32634967 | 1.50 | 1.22 | 1.85 | 0.00014  | 0.24 | 0.31 | 0.23 | SNP |
| chr6_32634090_T_C | 32634090 | 1.51 | 1.22 | 1.86 | 0.00014  | 0.24 | 0.31 | 0.22 | SNP |
| chr6_32634057_C_T | 32634057 | 1.51 | 1.22 | 1.86 | 0.00014  | 0.24 | 0.31 | 0.22 | SNP |
| chr6_32605708_A_G | 32605708 | 0.66 | 0.53 | 0.81 | 0.00014  | 0.45 | 0.38 | 0.47 | SNP |
| chr6_32607433_C_G | 32607433 | 0.65 | 0.52 | 0.81 | 0.00014  | 0.32 | 0.25 | 0.34 | SNP |
| chr6_32634485_C_A | 32634485 | 0.63 | 0.50 | 0.80 | 0.00014  | 0.32 | 0.27 | 0.33 | SNP |
| chr6_32634593_G_C | 32634593 | 1.50 | 1.22 | 1.86 | 0.00014  | 0.24 | 0.31 | 0.22 | SNP |
| chr6_32604564_C_T | 32604564 | 1.51 | 1.24 | 1.94 | 0.00014  | 0.33 | 0.41 | 0.31 | SNP |
| chr6_32636434_G_A | 32636434 | 0.65 | 0.53 | 0.81 | 0.00014  | 0.45 | 0.38 | 0.47 | SNP |
| chr6_32610947_A_C | 32610947 | 0.42 | 0.26 | 0.64 | 0.00014  | 0.06 | 0.03 | 0.06 | SNP |
| chr6_32520665_A_C | 32520665 | 0.49 | 0.30 | 0.58 | 0.00014  | 0.32 | 0.31 | 0.39 | SNP |
| chr6_32408012_G_A | 32408012 | 0.65 | 0.52 | 0.81 | 0.00014  | 0.32 | 0.25 | 0.34 | SNP |
| chr6_31243828_A_G | 31243828 | 0.68 | 0.55 | 0.83 | 0.00015  | 0.32 | 0.29 | 0.33 | SNP |
| chr6_32604372_G_C | 32604372 | 0.65 | 0.52 | 0.81 | 0.00015  | 0.43 | 0.38 | 0.48 | SNP |
| chr6_32633959_T_C | 32633959 | 1.50 | 1.22 | 1.85 | 0.00015  | 0.24 | 0.31 | 0.23 | SNP |
| chr6_32640597_G_C | 32640597 | 0.65 | 0.52 | 0.81 | 0.00015  | 0.32 | 0.25 | 0.34 | SNP |
| chr6_32632096_G_A | 32632096 | 1.52 | 1.22 | 1.89 | 0.00015  | 0.23 | 0.30 | 0.22 | SNP |
| chr6_32629802_G_A | 32629802 | 0.66 | 0.53 | 0.82 | 0.00015  | 0.45 | 0.37 | 0.47 | SNP |
| chr6_32520465_A_G | 32520465 | 0.68 | 0.55 | 0.83 | 0.00016  | 0.38 | 0.31 | 0.39 | SNP |
| chr6_32609425_C_G | 32609425 | 0.43 | 0.27 | 0.65 | 0.00016  | 0.05 | 0.03 | 0.06 | SNP |
| chr6_32627489_G_A | 32627489 | 1.50 | 1.22 | 1.86 | 0.00016  | 0.43 | 0.36 | 0.45 | SNP |
| chr6_32628751_T_C | 32628751 | 0.66 | 0.53 | 0.82 | 0.00016  | 0.47 | 0.40 | 0.49 | SNP |
| chr6_32604931_C_A | 32604931 | 1.51 | 1.22 | 1.87 | 0.00016  | 0.30 | 0.39 | 0.28 | SNP |
| chr6_32604908_A_G | 32604908 | 1.49 | 1.24 | 1.86 | 0.00016  | 0.24 | 0.31 | 0.26 | SNP |
| chr6_32604000_T_G | 32604000 | 0.66 | 0.53 | 0.82 | 0.00016  | 0.45 | 0.38 | 0.47 | SNP |
| chr6_32629545_T_C | 32629545 | 0.41 | 0.25 | 0.64 | 0.00016  | 0.05 | 0.03 | 0.06 | SNP |
| chr6_32636506_C_T | 32636506 | 1.49 | 1.21 | 1.84 | 0.00017  | 0.25 | 0.31 | 0.23 | SNP |
| chr6_32633775_T_G | 32633775 | 0.66 | 0.53 | 0.82 | 0.00017  | 0.35 | 0.29 | 0.37 | SNP |
| chr6_32609105_A_G | 32609105 | 0.66 | 0.53 | 0.82 | 0.00017  | 0.46 | 0.39 | 0.48 | SNP |
| chr6_32605274_C_T | 32605274 | 0.66 | 0.53 | 0.82 | 0.00017  | 0.45 | 0.38 | 0.47 | SNP |
| chr6_32628843_C_T | 32628843 | 0.41 | 0.26 | 0.64 | 0.00017  | 0.07 | 0.03 | 0.06 | SNP |
| chr6_32633909_T_A | 32633909 | 0.64 | 0.51 | 0.81 | 0.00017  | 0.33 | 0.27 | 0.34 | SNP |
| chr6_32634098_C_G | 32634098 | 1.50 | 1.21 | 1.85 | 0.00017  | 0.24 | 0.31 | 0.23 | SNP |
| chr6_32627714_G_T | 32627714 | 0.66 | 0.53 | 0.82 | 0.00017  | 0.43 | 0.37 | 0.47 | SNP |
| chr6_32629409_G_A | 32629409 | 0.63 | 0.50 | 0.80 | 0.00017  | 0.31 | 0.26 | 0.33 | SNP |
| chr6_32604394_T_C | 32604394 | 1.52 | 1.22 | 1.90 | 0.00017  | 0.30 | 0.38 | 0.28 | SNP |
| chr6_32633393_G_A | 32633393 | 1.50 | 1.21 | 1.86 | 0.00018  | 0.24 | 0.31 | 0.22 | SNP |
| chr6_32606085_T_A | 32606085 | 0.66 | 0.53 | 0.82 | 0.00018  | 0.45 | 0.38 | 0.47 | SNP |
| chr6_32611243_C_T | 32611243 | 1.52 | 1.22 | 1.90 | 0.00019  | 0.29 | 0.36 | 0.27 | SNP |
| chr6_32602955_C_T | 32602955 | 1.48 | 1.21 | 1.83 | 0.00019  | 0.33 | 0.41 | 0.30 | SNP |
| chr6_32629582_T_C | 32629582 | 0.64 | 0.50 | 0.80 | 0.00019  | 0.30 | 0.25 | 0.32 | SNP |
| chr6_32635949_G_A | 32635949 | 1.45 | 1.19 | 1.77 | 0.00019  | 0.29 | 0.36 | 0.27 | SNP |
| chr6_32637303_T_C | 32637303 | 0.54 | 0.38 | 0.74 | 0.00019  | 0.10 | 0.06 | 0.11 | SNP |
| chr6_32709964_T_C | 32709964 | 0.67 | 0.54 | 0.83 | 0.00020  | 0.31 | 0.25 | 0.33 | SNP |
| chr6_32607008_T_C | 32607008 | 0.66 | 0.53 | 0.82 | 0.00020  | 0.45 | 0.38 | 0.47 | SNP |
| chr6_32601968_G_A | 32601968 | 0.66 | 0.53 | 0.82 | 0.00020  | 0.45 | 0.38 | 0.47 | SNP |
| chr6_32605754_A_T | 32605754 | 0.66 | 0.53 | 0.82 | 0.00020  | 0.45 | 0.38 | 0.47 | SNP |
| chr6_32392436_A_G | 32392436 | 0.46 | 0.30 | 0.69 | 0.00020  | 0.06 | 0.03 | 0.07 | SNP |
| chr6_32611650_G_A | 32611650 | 1.53 | 1.22 | 1.91 | 0.00020  | 0.29 | 0.36 | 0.27 | SNP |
| chr6_32608467_G_A | 32608467 | 1.52 | 1.22 | 1.89 | 0.00020  | 0.29 | 0.37 | 0.27 | SNP |
| chr6_32610395_G_A | 32610395 | 0.63 | 0.49 | 0.80 | 0.00020  | 0.36 | 0.31 | 0.38 | SNP |
| chr6_32634261_C_T | 32634261 | 1.49 | 1.21 | 1.84 | 0.00021  | 0.24 | 0.31 | 0.23 | SNP |
| chr6_32634262_T_G | 32634262 | 1.49 | 1.21 | 1.84 | 0.00021  | 0.24 | 0.31 | 0.23 | SNP |
| chr6_32633467_G_A | 32633467 | 0.52 | 0.36 | 0.72 | 0.00021  | 0.09 | 0.05 | 0.10 | SNP |
| chr6_32634287_T_C | 32634287 | 0.64 | 0.50 | 0.81 | 0.00021  | 0.31 | 0.26 | 0.33 | SNP |
| chr6_31836827_G_T | 31836827 | 1.66 | 1.27 | 2.17 | 0.00021  | 0.33 | 0.35 | 0.33 | SNP |
| chr6_32634010_A_G | 32634010 | 0.64 | 0.50 | 0.81 | 0.00022  | 0.31 | 0.26 | 0.32 | SNP |
| chr6_32634755_C_T | 32634755 | 1.48 | 1.20 | 1.82 | 0.00022  | 0.24 | 0.30 | 0.22 | SNP |
| chr6_32628633_T_C | 32628633 | 1.50 | 1.21 | 1.85 | 0.00022  | 0.24 | 0.30 | 0.22 | SNP |
| chr6_32635266_T_C | 32635266 | 1.51 | 1.21 | 1.88 | 0.00022  | 0.23 | 0.30 | 0.21 | SNP |
| chr6_32633906_A_C | 32633906 | 0.64 | 0.51 | 0.81 | 0.00022  | 0.34 | 0.28 | 0.34 | SNP |
| chr6_32610059_G_T | 32610059 | 0.67 | 0.53 | 0.83 | 0.00023  | 0.45 | 0.38 | 0.47 | SNP |
| chr6_32188383_T_C | 32188383 | 1.44 | 1.19 | 1.74 | 0.00023  | 0.42 | 0.48 | 0.41 | SNP |
| chr6_32326230_C_T | 32326230 | 1.58 | 1.24 | 2.03 | 0.00024  | 0.35 | 0.37 | 0.34 | SNP |
| chr6_32611504_C_T | 32611504 | 0.66 | 0.53 | 0.83 | 0.00025  | 0.47 | 0.40 | 0.49 | SNP |
| chr6_32520639_G_A | 32520639 | 1.49 | 1.20 | 1.85 | 0.00025  | 0.31 | 0.40 | 0.29 | SNP |
| chr6_32634139_C_T | 32634139 | 1.48 | 1.20 | 1.83 | 0.00025  | 0.24 | 0.31 | 0.23 | SNP |
| chr6_32709990_T_C | 32709990 | 0.67 | 0.55 | 0.83 | 0.00025  | 0.31 | 0.25 | 0.33 | SNP |
| chr6_32634137_A_C | 32634137 | 1.48 | 1.20 | 1.83 | 0.00025  | 0.24 | 0.31 | 0.22 | SNP |
| chr6_32605943_A_G | 32605943 | 0.67 | 0.54 | 0.83 | 0.00026  | 0.45 | 0.38 | 0.47 | SNP |
| chr6_32628736_T_C | 32628736 | 0.67 | 0.54 | 0.83 | 0.00026  | 0.47 | 0.39 | 0.49 | SNP |
| chr6_32611474_G_A | 32611474 | 1.52 | 1.21 | 1.90 | 0.00026  | 0.27 | 0.35 | 0.25 | SNP |
| chr6_32611474_G_A | 32611474 | 1.52 | 1.21 | 1.90 | 0.00028  | 0.29 | 0.36 | 0.27 | SNP |
| chr6_32608473_G_A | 32608473 | 1.50 | 1.21 | 1.87 | 0.00028  | 0.30 | 0.37 | 0.28 | SNP |
| chr6_32628283_G_A | 32628283 | 1.53 | 1.22 | 1.92 | 0.00027  | 0.23 | 0.30 | 0.21 |     |



|                   |          |      |      |      |         |      |      |      |     |
|-------------------|----------|------|------|------|---------|------|------|------|-----|
| chr6_31910929_G_A | 31910929 | 0.53 | 0.37 | 0.74 | 0.00038 | 0.08 | 0.05 | 0.09 | SNP |
| chr6_32606176_T_A | 32606176 | 0.67 | 0.54 | 0.84 | 0.00038 | 0.45 | 0.38 | 0.47 | SNP |
| chr6_31903121_G_A | 31903121 | 0.44 | 0.28 | 0.68 | 0.00039 | 0.06 | 0.03 | 0.06 | SNP |
| chr6_32441330_C_G | 32441330 | 1.48 | 1.19 | 1.85 | 0.00039 | 0.30 | 0.38 | 0.28 | SNP |
| chr6_32634990_G_T | 32634990 | 0.53 | 0.37 | 0.75 | 0.00039 | 0.05 | 0.05 | 0.09 | SNP |
| chr6_32559124_T_C | 32559124 | 1.50 | 1.20 | 1.88 | 0.00040 | 0.20 | 0.36 | 0.26 | SNP |
| chr6_32917042_A_C | 32917042 | 1.75 | 1.28 | 2.38 | 0.00041 | 0.06 | 0.09 | 0.05 | SNP |
| chr6_32636172_C_T | 32636172 | 1.47 | 1.19 | 1.81 | 0.00041 | 0.45 | 0.30 | 0.22 | SNP |
| chr6_32636138_A_G | 32636138 | 1.47 | 1.19 | 1.82 | 0.00041 | 0.24 | 0.30 | 0.22 | SNP |
| chr6_32559212_A_G | 32559212 | 1.49 | 1.20 | 1.87 | 0.00041 | 0.29 | 0.36 | 0.27 | SNP |
| chr6_32609427_C_G | 32609427 | 0.68 | 0.55 | 0.84 | 0.00041 | 0.45 | 0.38 | 0.47 | SNP |
| chr6_32604558_G_A | 32604558 | 0.70 | 0.57 | 0.85 | 0.00041 | 0.25 | 0.18 | 0.27 | SNP |
| chr6_32152442_A_G | 32152442 | 1.75 | 1.28 | 2.39 | 0.00042 | 0.17 | 0.19 | 0.16 | SNP |
| chr6_32610008_C_T | 32610008 | 1.48 | 1.19 | 1.81 | 0.00042 | 0.30 | 0.38 | 0.28 | SNP |
| chr6_31325792_G_A | 31325792 | 1.53 | 1.21 | 1.94 | 0.00043 | 0.36 | 0.38 | 0.35 | SNP |
| chr6_32628944_C_G | 32628944 | 1.49 | 1.19 | 1.87 | 0.00043 | 0.36 | 0.44 | 0.34 | SNP |
| chr6_32605759_A_T | 32605759 | 0.68 | 0.55 | 0.84 | 0.00043 | 0.45 | 0.38 | 0.47 | SNP |
| chr6_32439753_T_A | 32439753 | 0.65 | 0.51 | 0.82 | 0.00045 | 0.30 | 0.26 | 0.32 | SNP |
| chr6_32550591_G_A | 32550591 | 0.44 | 0.27 | 0.68 | 0.00046 | 0.06 | 0.03 | 0.06 | SNP |
| chr6_32610968_G_A | 32610968 | 1.49 | 1.19 | 1.85 | 0.00047 | 0.27 | 0.34 | 0.25 | SNP |
| chr6_31326703_T_C | 31326703 | 2.30 | 1.44 | 3.66 | 0.00047 | 0.12 | 0.13 | 0.12 | SNP |
| chr6_32607221_C_G | 32607221 | 0.53 | 0.37 | 0.75 | 0.00048 | 0.09 | 0.06 | 0.10 | SNP |
| chr6_32612326_C_G | 32612326 | 1.48 | 1.19 | 1.84 | 0.00049 | 0.29 | 0.37 | 0.27 | SNP |
| chr6_32611373_A_G | 32611373 | 0.67 | 0.53 | 0.84 | 0.00049 | 0.49 | 0.42 | 0.51 | SNP |
| chr6_31326074_A_T | 31326074 | 2.29 | 1.44 | 3.65 | 0.00050 | 0.12 | 0.13 | 0.11 | SNP |
| chr6_32612069_C_T | 32612069 | 1.49 | 1.19 | 1.85 | 0.00051 | 0.27 | 0.34 | 0.25 | SNP |
| chr6_32612161_C_A | 32612161 | 1.48 | 1.19 | 1.84 | 0.00051 | 0.29 | 0.37 | 0.27 | SNP |
| chr6_32147696_G_A | 32147696 | 1.74 | 1.27 | 2.38 | 0.00051 | 0.17 | 0.18 | 0.16 | SNP |
| chr6_32634103_C_G | 32634103 | 0.68 | 0.54 | 0.84 | 0.00052 | 0.45 | 0.38 | 0.47 | SNP |
| chr6_32608967_A_G | 32608967 | 0.54 | 0.38 | 0.76 | 0.00052 | 0.09 | 0.06 | 0.10 | SNP |
| chr6_32604108_T_C | 32604108 | 1.47 | 1.18 | 1.82 | 0.00052 | 0.30 | 0.38 | 0.28 | SNP |
| chr6_32612166_C_T | 32612166 | 1.48 | 1.19 | 1.84 | 0.00053 | 0.29 | 0.37 | 0.27 | SNP |
| chr6_32611769_G_C | 32611769 | 1.50 | 1.19 | 1.89 | 0.00053 | 0.31 | 0.39 | 0.29 | SNP |
| chr6_32609195_G_A | 32609195 | 0.55 | 0.38 | 0.76 | 0.00053 | 0.08 | 0.05 | 0.09 | SNP |
| chr6_32611472_C_G | 32611472 | 0.68 | 0.58 | 0.85 | 0.00054 | 0.46 | 0.39 | 0.48 | SNP |
| chr6_32606732_G_A | 32606732 | 1.46 | 1.18 | 1.81 | 0.00056 | 0.30 | 0.38 | 0.28 | SNP |
| chr6_32611510_C_G | 32611510 | 0.68 | 0.55 | 0.85 | 0.00056 | 0.46 | 0.40 | 0.48 | SNP |
| chr6_31430065_C_T | 31430065 | 2.33 | 1.44 | 3.78 | 0.00057 | 0.12 | 0.13 | 0.11 | SNP |
| chr6_32611265_C_T | 32611265 | 1.47 | 1.18 | 1.83 | 0.00057 | 0.29 | 0.36 | 0.27 | SNP |
| chr6_32184066_G_T | 32184066 | 1.39 | 1.15 | 1.67 | 0.00058 | 0.42 | 0.47 | 0.41 | SNP |
| chr6_32148031_A_G | 32148031 | 1.73 | 1.26 | 2.36 | 0.00058 | 0.17 | 0.18 | 0.16 | SNP |
| chr6_32612179_T_C | 32612179 | 1.47 | 1.18 | 1.82 | 0.00058 | 0.29 | 0.37 | 0.27 | SNP |
| chr6_32261940_G_C | 32261940 | 0.42 | 0.24 | 0.67 | 0.00059 | 0.04 | 0.02 | 0.05 | SNP |
| chr6_32500957_A_T | 32500957 | 0.57 | 0.41 | 0.78 | 0.00060 | 0.19 | 0.15 | 0.20 | SNP |
| chr6_32611403_G_A | 32611403 | 1.47 | 1.18 | 1.83 | 0.00061 | 0.23 | 0.29 | 0.22 | SNP |
| chr6_32710407_T_C | 32710407 | 1.81 | 1.29 | 2.54 | 0.00061 | 0.06 | 0.10 | 0.05 | SNP |
| chr6_32611759_T_C | 32611759 | 0.55 | 0.39 | 0.77 | 0.00061 | 0.08 | 0.05 | 0.09 | SNP |
| chr6_31464587_C_T | 31464587 | 0.42 | 0.25 | 0.67 | 0.00062 | 0.04 | 0.02 | 0.05 | SNP |
| chr6_32604059_A_G | 32604059 | 1.46 | 1.17 | 1.81 | 0.00062 | 0.30 | 0.37 | 0.28 | SNP |
| chr6_32192617_T_C | 32192617 | 0.46 | 0.29 | 0.70 | 0.00063 | 0.05 | 0.03 | 0.06 | SNP |
| chr6_32521591_C_T | 32521591 | 1.47 | 1.18 | 1.82 | 0.00063 | 0.32 | 0.40 | 0.30 | SNP |
| chr6_32610300_C_T | 32610300 | 0.55 | 0.38 | 0.77 | 0.00063 | 0.08 | 0.05 | 0.09 | SNP |
| chr6_31324375_G_T | 31324375 | 0.53 | 0.36 | 0.75 | 0.00066 | 0.09 | 0.06 | 0.09 | SNP |
| chr6_32636063_G_A | 32636063 | 1.44 | 1.17 | 1.78 | 0.00066 | 0.24 | 0.31 | 0.22 | SNP |
| chr6_32612041_A_G | 32612041 | 1.47 | 1.18 | 1.83 | 0.00067 | 0.29 | 0.37 | 0.27 | SNP |
| chr6_31127562_C_T | 31127562 | 1.60 | 1.22 | 2.10 | 0.00069 | 0.20 | 0.21 | 0.19 | SNP |
| chr6_32606942_G_A | 32606942 | 1.45 | 1.17 | 1.80 | 0.00070 | 0.30 | 0.38 | 0.28 | SNP |
| chr6_32973263_T_A | 32973263 | 1.32 | 1.12 | 1.55 | 0.00070 | 0.46 | 0.50 | 0.44 | SNP |
| chr6_31236051_A_G | 31236051 | 1.37 | 1.14 | 1.65 | 0.00071 | 0.49 | 0.51 | 0.48 | SNP |
| chr6_31600756_A_T | 31600756 | 0.60 | 0.44 | 0.80 | 0.00071 | 0.06 | 0.07 | 0.11 | SNP |
| chr6_32604151_C_T | 32604151 | 1.46 | 1.17 | 1.81 | 0.00072 | 0.30 | 0.37 | 0.28 | SNP |
| chr6_32270222_C_A | 32270222 | 0.43 | 0.26 | 0.69 | 0.00072 | 0.04 | 0.02 | 0.05 | SNP |
| chr6_32636154_G_A | 32636154 | 1.44 | 1.17 | 1.79 | 0.00072 | 0.30 | 0.38 | 0.28 | SNP |
| chr6_32611760_T_C | 32611760 | 1.47 | 1.17 | 1.83 | 0.00073 | 0.29 | 0.37 | 0.27 | SNP |
| chr6_32612241_A_T | 32612241 | 1.46 | 1.17 | 1.82 | 0.00073 | 0.29 | 0.37 | 0.27 | SNP |
| chr6_32559702_G_A | 32559702 | 1.60 | 1.22 | 1.90 | 0.00073 | 0.28 | 0.35 | 0.19 | SNP |
| chr6_32550819_C_A | 32550819 | 1.46 | 1.17 | 1.82 | 0.00074 | 0.29 | 0.37 | 0.27 | SNP |
| chr6_31112737_C_A | 31112737 | 1.67 | 1.24 | 2.25 | 0.00074 | 0.19 | 0.22 | 0.19 | SNP |
| chr6_32410137_C_G | 32410137 | 1.43 | 1.16 | 1.73 | 0.00075 | 0.22 | 0.31 | 0.23 | SNP |
| chr6_31902645_A_G | 31902645 | 0.47 | 0.30 | 0.72 | 0.00075 | 0.05 | 0.03 | 0.06 | SNP |
| chr6_31324750_G_A | 31324750 | 0.54 | 0.37 | 0.76 | 0.00075 | 0.09 | 0.06 | 0.10 | SNP |
| chr6_32627635_G_A | 32627635 | 0.68 | 0.59 | 0.86 | 0.00076 | 0.45 | 0.38 | 0.46 | SNP |
| chr6_32972903_G_A | 32972903 | 1.43 | 1.16 | 1.76 | 0.00076 | 0.34 | 0.41 | 0.13 | SNP |
| chr6_31924880_G_A | 31924880 | 0.55 | 0.39 | 0.77 | 0.00076 | 0.08 | 0.05 | 0.09 | SNP |
| chr6_32608946_G_A | 32608946 | 0.56 | 0.39 | 0.77 | 0.00076 | 0.08 | 0.05 | 0.09 | SNP |
| chr6_32633816_C_G | 32633816 | 1.39 | 1.15 | 1.69 | 0.00076 | 0.38 | 0.42 | 0.36 | SNP |
| chr6_32612096_A_G | 32612096 | 0.56 | 0.39 | 0.77 | 0.00076 | 0.08 | 0.05 | 0.09 | SNP |
| chr6_32374595_A_G | 32374595 | 0.57 | 0.40 | 0.78 | 0.00077 | 0.18 | 0.15 | 0.19 | SNP |
| chr6_32375796_A_T | 32375796 | 0.57 | 0.40 | 0.78 | 0.00077 | 0.18 | 0.15 | 0.19 | SNP |
| chr6_32145205_C_T | 32145205 | 1.72 | 1.25 | 2.35 | 0.00077 | 0.18 | 0.21 | 0.17 | SNP |
| chr6_32604239_C_G | 32604239 | 1.46 | 1.17 | 1.81 | 0.00077 | 0.30 | 0.37 | 0.28 | SNP |
| chr6_32638098_G_A | 32638098 | 0.45 | 0.27 | 0.70 | 0.00078 | 0.05 | 0.03 | 0.06 | SNP |
| chr6_31373445_T_C | 31373445 | 2.21 | 1.38 | 3.51 | 0.00079 | 0.03 | 0.04 | 0.02 | SNP |
| chr6_32609874_T_G | 32609874 | 0.56 | 0.39 | 0.78 | 0.00079 | 0.08 | 0.05 | 0.09 | SNP |
| chr6_32610075_A_G | 32610075 | 0.56 | 0.39 | 0.78 | 0.00079 | 0.08 | 0.05 | 0.09 | SNP |
| chr6_32610313_C_G | 32610313 | 0.56 | 0.39 | 0.78 | 0.00079 | 0.08 | 0.05 | 0.09 | SNP |
| chr6_32608934_A_T | 32608934 | 0.56 | 0.39 | 0.78 | 0.00080 | 0.08 | 0.05 | 0.09 | SNP |
| chr6_31248382_C_T | 31248382 | 0.57 | 0.40 | 0.78 | 0.00080 | 0.08 | 0.06 | 0.11 | SNP |
| chr6_32612008_T_C | 32612008 | 1.47 | 1.17 | 1.84 | 0.00081 | 0.29 | 0.36 | 0.27 | SNP |
| chr6_32605336_G_A | 32605336 | 1.44 | 1.16 | 1.79 | 0.00081 | 0.30 | 0.38 | 0.28 | SNP |
| chr6_32605419_G_A | 32605419 | 1.44 | 1.17 | 1.79 | 0.00081 | 0.30 | 0.38 | 0.28 | SNP |
| chr6_32612251_T_G | 32612251 | 1.45 | 1.17 | 1.81 | 0.00082 | 0.29 | 0.37 | 0.27 | SNP |
| chr6_32605101_A_G | 32605101 | 1.44 | 1.16 | 1.79 | 0.00083 | 0.30 | 0.38 | 0.28 | SNP |
| chr6_32611215_C_T | 32611215 | 0.56 | 0.39 | 0.78 | 0.00083 | 0.08 | 0.05 | 0.09 | SNP |
| chr6_32610688_C_G | 32610688 | 0.56 | 0.39 | 0.78 | 0.00083 | 0.08 | 0.05 | 0.09 | SNP |
| chr6_32184094_G_A | 32184094 | 1.37 | 1.14 | 1.64 | 0.00084 | 0.43 | 0.48 | 0.41 | SNP |
| chr6_32556605_C_C | 32556605 | 0.69 | 0.55 | 0.86 | 0.00084 | 0.22 | 0.16 | 0.22 | SNP |
| chr6_32611260_A_G | 32611260 | 1.45 | 1.17 | 1.81 | 0.00085 | 0.29 | 0.36 | 0.27 | SNP |
| chr6_32610696_G_A | 32610696 | 0.56 | 0.39 | 0.78 | 0.00085 | 0.08 | 0.05 | 0.09 | SNP |
| chr6_32609300_C_T | 32609300 | 1.52 | 1.19 | 1.94 | 0.00085 | 0.36 | 0.43 | 0.34 | SNP |
| chr6_32609341_T_C | 32609341 | 0.68 | 0.55 | 0.85 | 0.00089 | 0.47 | 0.41 | 0.49 | SNP |
| chr6_32188297_G_C | 32188297 | 1.38 | 1.14 | 1.68 | 0.00090 | 0.29 | 0.35 | 0.28 | SNP |
| chr6_32606960_A_T | 32606960 | 0.56 | 0.39 | 0.78 | 0.00091 | 0.08 | 0.05 | 0.09 | SNP |
| chr6_32633617_A_G | 32633617 | 0.69 | 0.55 | 0.86 | 0.00091 | 0.44 | 0.38 | 0.46 | SNP |
| chr6_31902289_C_G | 31902289 | 0.48 | 0.30 | 0.73 | 0.00093 | 0.05 | 0.03 | 0.06 | SNP |
| chr6_32184221_G_A | 32184221 | 1.36 | 1.13 | 1.64 | 0.00093 | 0.43 | 0.48 | 0.41 | SNP |
| chr6_31919956_T_C | 31919956 | 0.56 | 0.39 | 0.78 | 0.00094 | 0.08 | 0.05 | 0.09 | SNP |
| chr6_31916951_T_C | 31916951 | 0.56 | 0.40 | 0.78 | 0.00095 | 0.08 | 0.05 | 0.09 | SNP |
| chr6_31919117_T_C | 31919117 | 0.56 | 0.40 | 0.78 | 0.00095 | 0.08 | 0.05 | 0.09 | SNP |
| chr6_32409056_G_A | 32409056 | 1.41 | 1.15 | 1.72 | 0.00095 | 0.29 | 0.32 | 0.28 | SNP |
| chr6_32785275_G_A | 32785275 | 0.59 | 0.43 | 0.80 | 0.00097 | 0.09 | 0.06 | 0.10 | SNP |
| chr6_32605861_G_A | 32605861 | 0.56 | 0.39 | 0.78 | 0.00097 | 0.08 | 0.05 | 0.09 |     |

|                       |          |      |      |      |         |      |        |      |           |
|-----------------------|----------|------|------|------|---------|------|--------|------|-----------|
| chr6_32406122_G_A     | 32406122 | 1.80 | 1.27 | 2.81 | 0.00146 | 0.03 | 0.05   | 0.03 | SNP       |
| chr6_31325092_G_A     | 31325092 | 1.53 | 1.18 | 1.98 | 0.00147 | 0.34 | 0.36   | 0.33 | SNP       |
| chr6_31915532_C_T     | 31915532 | 0.40 | 0.22 | 0.69 | 0.00149 | 0.04 | 0.02   | 0.04 | SNP       |
| chr6_32136029_A_G     | 32136029 | 2.05 | 1.31 | 3.17 | 0.00149 | 0.03 | 0.05   | 0.03 | SNP       |
| chr6_31485796_C_T     | 31485796 | 1.98 | 1.29 | 3.00 | 0.00149 | 0.00 | 0.05   | 0.03 | SNP       |
| chr6_31238851_C_T     | 31238851 | 1.58 | 1.19 | 2.10 | 0.00150 | 0.22 | 0.33   | 0.31 | SNP       |
| chr6_31232116_C_T     | 31232116 | 1.96 | 1.28 | 2.95 | 0.00150 | 0.03 | 0.05   | 0.03 | SNP       |
| chr6_32408932_G_A     | 32408932 | 1.90 | 1.27 | 2.80 | 0.00151 | 0.03 | 0.05   | 0.03 | SNP       |
| chr6_32411573_C_T     | 32411573 | 1.90 | 1.27 | 2.80 | 0.00151 | 0.03 | 0.05   | 0.03 | SNP       |
| chr6_32406473_G_A     | 32406473 | 1.49 | 1.16 | 1.90 | 0.00153 | 0.21 | 0.24   | 0.21 | SNP       |
| chr6_32782018_C_T     | 32782018 | 0.59 | 0.44 | 0.82 | 0.00155 | 0.00 | 0.07   | 0.10 | SNP       |
| chr6_32557301_C_T     | 32557301 | 0.40 | 0.22 | 0.69 | 0.00156 | 0.03 | 0.02   | 0.04 | SNP       |
| chr6_32610994_C_A     | 32610994 | 1.44 | 1.15 | 1.80 | 0.00157 | 0.27 | 0.33   | 0.25 | SNP       |
| chr6_31322500_G_A     | 31322500 | 1.67 | 1.12 | 2.36 | 0.00159 | 0.19 | 0.22   | 0.18 | SNP       |
| chr6_32782112_C_T     | 32782112 | 2.07 | 1.31 | 3.24 | 0.00160 | 0.02 | 0.04   | 0.02 | SNP       |
| chr6_32633819_A_G     | 32633819 | 0.70 | 0.56 | 0.87 | 0.00161 | 0.50 | 0.45   | 0.51 | SNP       |
| chr6_32607170_A_G     | 32607170 | 0.57 | 0.40 | 0.80 | 0.00162 | 0.09 | 0.05   | 0.09 | SNP       |
| chr6_31465047_G_T     | 31465047 | 2.15 | 1.33 | 3.46 | 0.00163 | 0.12 | 0.13   | 0.12 | SNP       |
| chr6_3116210_G_A      | 3116210  | 1.49 | 1.16 | 1.92 | 0.00163 | 0.24 | 0.25   | 0.24 | SNP       |
| chr6_32789400_G_A     | 32789400 | 0.44 | 0.26 | 0.72 | 0.00168 | 0.04 | 0.02   | 0.05 | SNP       |
| chr6_32628913_G_T     | 32628913 | 1.55 | 1.18 | 2.04 | 0.00169 | 0.18 | 0.24   | 0.16 | SNP       |
| chr6_32188603_C_T     | 32188603 | 1.36 | 1.12 | 1.65 | 0.00169 | 0.29 | 0.34   | 0.28 | SNP       |
| chr6_32611229_C_T     | 32611229 | 0.71 | 0.57 | 0.88 | 0.00175 | 0.45 | 0.39   | 0.48 | SNP       |
| chr6_32608809_T_C     | 32608809 | 1.43 | 1.14 | 1.79 | 0.00176 | 0.27 | 0.35   | 0.25 | SNP       |
| chr6_32610997_C_G     | 32610997 | 1.43 | 1.14 | 1.79 | 0.00176 | 0.27 | 0.33   | 0.25 | SNP       |
| chr6_31232149_C_T     | 31232149 | 1.53 | 1.17 | 1.99 | 0.00177 | 0.32 | 0.34   | 0.31 | SNP       |
| chr6_31914180_G_A     | 31914180 | 0.58 | 0.41 | 0.81 | 0.00178 | 0.08 | 0.05   | 0.09 | SNP       |
| chr6_31326948_C_A     | 31326948 | 0.64 | 0.48 | 0.84 | 0.00179 | 0.11 | 0.08   | 0.11 | SNP       |
| chr6_31905372_C_T     | 31905372 | 0.60 | 0.40 | 0.82 | 0.00182 | 0.13 | 0.07   | 0.10 | SNP       |
| chr6_32559444_C_T     | 32559444 | 0.61 | 0.44 | 0.82 | 0.00185 | 0.09 | 0.06   | 0.10 | SNP       |
| chr6_32628184_A_T     | 32628184 | 1.33 | 1.11 | 1.59 | 0.00186 | 0.34 | 0.39   | 0.32 | SNP       |
| chr6_31906505_C_T     | 31906505 | 0.58 | 0.41 | 0.81 | 0.00187 | 0.04 | 0.05   | 0.09 | SNP       |
| chr6_32520460_C_T     | 32520460 | 1.40 | 1.13 | 1.73 | 0.00187 | 0.32 | 0.39   | 0.30 | SNP       |
| chr6_32629764_C_T     | 32629764 | 1.41 | 1.13 | 1.75 | 0.00188 | 0.38 | 0.45   | 0.36 | SNP       |
| chr6_31905130_G_A     | 31905130 | 0.58 | 0.41 | 0.81 | 0.00188 | 0.08 | 0.05   | 0.09 | SNP       |
| chr6_31905328_G_T     | 31905328 | 0.58 | 0.41 | 0.81 | 0.00188 | 0.08 | 0.05   | 0.09 | SNP       |
| chr6_31907147_T_C     | 31907147 | 0.58 | 0.41 | 0.81 | 0.00188 | 0.08 | 0.05   | 0.09 | SNP       |
| chr6_31907168_C_T     | 31907168 | 0.58 | 0.41 | 0.81 | 0.00188 | 0.08 | 0.05   | 0.09 | SNP       |
| chr6_32781076_G_A     | 32781076 | 0.61 | 0.45 | 0.83 | 0.00190 | 0.09 | 0.06   | 0.10 | SNP       |
| chr6_32633971_A_G     | 32633971 | 1.43 | 1.14 | 1.78 | 0.00190 | 0.19 | 0.25   | 0.18 | SNP       |
| chr6_31326682_G_A     | 31326682 | 0.64 | 0.48 | 0.83 | 0.00191 | 0.10 | 0.08   | 0.11 | SNP       |
| chr6_31931177_C_T     | 31931177 | 0.61 | 0.44 | 0.83 | 0.00196 | 0.07 | 0.12   | 0.09 | SNP       |
| chr6_29893131_C_T     | 29893131 | 0.37 | 0.19 | 0.66 | 0.00196 | 0.03 | 0.01   | 0.04 | SNP       |
| chr6_31326080_T_C     | 31326080 | 0.61 | 0.44 | 0.83 | 0.00205 | 0.09 | 0.07   | 0.09 | SNP       |
| chr6_31326939_A_G     | 31326939 | 0.66 | 0.48 | 0.85 | 0.00207 | 0.11 | 0.08   | 0.11 | SNP       |
| chr6_31321211_C_T     | 31321211 | 0.75 | 0.63 | 0.90 | 0.00208 | 0.41 | 0.37   | 0.42 | SNP       |
| chr6_32410576_C_T     | 32410576 | 1.37 | 1.12 | 1.68 | 0.00209 | 0.28 | 0.31   | 0.28 | SNP       |
| chr6_32608956_T_C     | 32608956 | 1.42 | 1.13 | 1.77 | 0.00213 | 0.28 | 0.35   | 0.27 | SNP       |
| chr6_31947086_G_A     | 31947086 | 0.63 | 0.46 | 0.84 | 0.00214 | 0.11 | 0.07   | 0.12 | SNP       |
| chr6_31125705_C_G     | 31125705 | 1.54 | 1.17 | 2.02 | 0.00215 | 0.20 | 0.21   | 0.19 | SNP       |
| chr6_31473746_G_A     | 31473746 | 2.12 | 1.31 | 2.43 | 0.00223 | 0.12 | 0.13   | 0.12 | SNP       |
| chr6_32629859_G_A     | 32629859 | 0.71 | 0.57 | 0.88 | 0.00225 | 0.48 | 0.43   | 0.50 | SNP       |
| chr6_31322108_T_C     | 31322108 | 1.98 | 1.27 | 3.05 | 0.00226 | 0.03 | 0.04   | 0.02 | SNP       |
| chr6_31325745_C_T     | 31325745 | 1.33 | 1.11 | 1.58 | 0.00228 | 0.47 | 0.52   | 0.45 | SNP       |
| HLA_2Fhd8_B_08_01     | 31321652 | 2.07 | 1.30 | 3.31 | 0.00229 | 0.12 | 0.13   | 0.11 | HLA (HLA) |
| chr6_32505931_C_A     | 32505931 | 1.42 | 1.13 | 1.79 | 0.00227 | 0.23 | 0.30   | 0.21 | SNP       |
| chr6_32505946_T_C     | 32505946 | 1.40 | 1.13 | 1.73 | 0.00241 | 0.73 | 0.38   | 0.29 | SNP       |
| chr6_31325317_C_T     | 31325317 | 0.64 | 0.48 | 0.85 | 0.00243 | 0.10 | 0.08   | 0.11 | SNP       |
| chr6_32975381_G_A     | 32975381 | 0.76 | 0.64 | 0.91 | 0.00243 | 0.40 | 0.35   | 0.41 | SNP       |
| chr6_313281842_C_T    | 31328184 | 1.32 | 1.10 | 1.58 | 0.00248 | 0.34 | 0.39   | 0.32 | SNP       |
| chr6_32804798_G_A     | 32804798 | 1.35 | 1.11 | 1.63 | 0.00249 | 0.28 | 0.35   | 0.26 | SNP       |
| chr6_31935311_C_T     | 31935311 | 0.62 | 0.45 | 0.84 | 0.00252 | 0.11 | 0.07   | 0.12 | SNP       |
| chr6_31635713_C_T     | 31635713 | 0.72 | 0.58 | 0.89 | 0.00253 | 0.07 | 0.05   | 0.09 | SNP       |
| chr6_32604660_C_T     | 32604660 | 0.60 | 0.43 | 0.83 | 0.00258 | 0.09 | 0.06   | 0.10 | SNP       |
| chr6_31864304_G_A     | 31864304 | 1.45 | 1.14 | 1.84 | 0.00260 | 0.37 | 0.39   | 0.37 | SNP       |
| chr6_31322611_C_T     | 31322611 | 0.96 | 0.25 | 1.02 | 0.00261 | 0.04 | 0.04   | 0.02 | SNP       |
| chr6_31323455_A_G     | 31323455 | 1.96 | 1.25 | 3.02 | 0.00261 | 0.03 | 0.04   | 0.02 | SNP       |
| chr6_32629347_T_C     | 32629347 | 1.40 | 1.13 | 1.75 | 0.00262 | 0.37 | 0.44   | 0.35 | SNP       |
| chr6_31321537_C_T     | 31321537 | 1.96 | 1.25 | 3.02 | 0.00263 | 0.04 | 0.04   | 0.02 | SNP       |
| chr6_31322987_C_T     | 31322987 | 1.96 | 1.25 | 3.02 | 0.00263 | 0.03 | 0.04   | 0.02 | SNP       |
| chr6_32627652_C_G     | 32627652 | 1.39 | 1.12 | 1.73 | 0.00267 | 0.38 | 0.45   | 0.36 | SNP       |
| chr6_31141247_G_A     | 31141247 | 1.93 | 1.29 | 3.12 | 0.00268 | 0.07 | 0.13   | 0.12 | SNP       |
| chr6_32629400_A_G     | 32629400 | 1.40 | 1.12 | 1.74 | 0.00269 | 0.37 | 0.44   | 0.35 | SNP       |
| chr6_32783365_C_T     | 32783365 | 0.63 | 0.46 | 0.85 | 0.00269 | 0.09 | 0.07   | 0.10 | SNP       |
| chr6_32629535_C_A     | 32629535 | 1.40 | 1.12 | 1.73 | 0.00272 | 0.37 | 0.44   | 0.35 | SNP       |
| chr6_31932109_G_A     | 31932109 | 0.39 | 0.20 | 0.69 | 0.00273 | 0.04 | 0.02   | 0.04 | SNP       |
| chr6_31240060_G_A     | 31240060 | 1.50 | 1.15 | 1.95 | 0.00278 | 0.33 | 0.34   | 0.32 | SNP       |
| chr6_31430010_G_A     | 31430010 | 2.06 | 1.28 | 3.32 | 0.00283 | 0.14 | 0.13   | 0.12 | SNP       |
| chr6_32803576_A_G     | 32803576 | 1.55 | 1.16 | 2.05 | 0.00283 | 0.08 | 0.12   | 0.06 | SNP       |
| chr6_31325764_C_G     | 31325764 | 0.66 | 0.49 | 0.86 | 0.00289 | 0.11 | 0.09   | 0.12 | SNP       |
| chr6_31930042_G_A     | 31930042 | 0.67 | 0.52 | 0.87 | 0.00290 | 0.13 | 0.10   | 0.14 | SNP       |
| chr6_31490704_G_T     | 31490704 | 1.46 | 1.14 | 1.88 | 0.00291 | 0.33 | 0.38   | 0.21 | SNP       |
| chr6_32608350_G_A     | 32608350 | 0.58 | 0.40 | 0.82 | 0.00292 | 0.10 | 0.06   | 0.10 | SNP       |
| chr6_32628845_G_A     | 32628845 | 1.40 | 1.12 | 1.74 | 0.00292 | 0.37 | 0.44   | 0.35 | SNP       |
| chr6_32609848_G_A     | 32609848 | 1.41 | 1.12 | 1.77 | 0.00295 | 0.17 | 0.19   | 0.13 | SNP       |
| chr6_31901773_G_A     | 31901773 | 0.43 | 0.23 | 0.73 | 0.00295 | 0.03 | 0.02   | 0.04 | SNP       |
| chr6_32190620_T_C     | 32190620 | 0.75 | 0.61 | 0.90 | 0.00298 | 0.26 | 0.21   | 0.27 | SNP       |
| chr6_29891850_A_G     | 29891850 | 1.29 | 0.96 | 1.53 | 0.00298 | 0.04 | 0.05   | 0.42 | SNP       |
| chr6_32606217_G_A     | 32606217 | 1.39 | 1.12 | 1.73 | 0.00299 | 0.31 | 0.38   | 0.29 | SNP       |
| chr6_29855331_G_A     | 29855331 | 1.39 | 1.12 | 1.73 | 0.00305 | 0.19 | 0.21   | 0.19 | SNP       |
| chr6_31365724_G_A     | 31365724 | 0.59 | 0.41 | 0.83 | 0.00309 | 0.07 | 0.05   | 0.08 | SNP       |
| chr6_32629331_A_G     | 32629331 | 1.39 | 1.12 | 1.74 | 0.00311 | 0.36 | 0.44   | 0.34 | SNP       |
| chr6_32785029_T_C     | 32785029 | 0.63 | 0.47 | 0.85 | 0.00313 | 0.09 | 0.07   | 0.10 | SNP       |
| chr6_3240596_T_A      | 3240596  | 0.49 | 0.29 | 0.77 | 0.00316 | 0.04 | 0.02   | 0.05 | SNP       |
| chr6_32976909_G_A     | 32976909 | 0.79 | 0.67 | 0.92 | 0.00317 | 0.48 | 0.45   | 0.49 | SNP       |
| chr6_32374382_C_A     | 32374382 | 0.51 | 0.32 | 0.78 | 0.00317 | 0.05 | 0.03   | 0.05 | SNP       |
| chr6_32374437_G_A     | 32374437 | 0.51 | 0.32 | 0.78 | 0.00317 | 0.05 | 0.03   | 0.05 | SNP       |
| chr6_32374640_G_A     | 32374640 | 0.51 | 0.32 | 0.78 | 0.00317 | 0.05 | 0.03   | 0.05 | SNP       |
| chr6_32713267_G_A     | 32713267 | 1.49 | 1.14 | 1.94 | 0.00319 | 0.09 | 0.11   | 0.08 | SNP       |
| HLA_2Fhd8_B_40_01     | 32321652 | 0.62 | 0.45 | 0.85 | 0.00321 | 0.05 | 0.07   | 0.10 | HLA (HLA) |
| chr6_32785035_A_G     | 32785035 | 0.64 | 0.47 | 0.85 | 0.00328 | 0.09 | 0.07   | 0.10 | SNP       |
| chr6_32609286_T_C     | 32609286 | 0.73 | 0.59 | 0.90 | 0.00331 | 0.49 | 0.56   | 0.47 | SNP       |
| chr6_3212142_A_G      | 3212142  | 0.75 | 0.62 | 0.91 | 0.00331 | 0.34 | 0.35   | 0.26 | SNP       |
| chr6_32604642_G_A     | 32604642 | 1.42 | 1.12 | 1.78 | 0.00333 | 0.28 | 0.35   | 0.26 | SNP       |
| chr6_32629509_A_G     | 32629509 | 1.39 | 1.11 | 1.72 | 0.00335 | 0.37 | 0.44   | 0.36 | SNP       |
| chr6_32793721_G_A     | 32793721 | 1.64 | 1.17 | 2.27 | 0.00359 | 0.73 | 0.04   | 0.03 | SNP       |
| chr6_32550587_T_G     | 32550587 | 0.50 | 0.31 | 0.78 | 0.00341 | 0.05 | 0.03   | 0.05 | SNP       |
| HLA_2Fhd8_Dfhd1_04_01 | 32546552 | 1.48 | 1.14 | 1.92 | 0.00341 | 0.13 | 0.20   | 0.11 | HLA (HLA) |
| chr6_31121482_G_A     | 31121482 | 1.60 | 1.16 | 2.19 | 0.00342 | 0.15 | 0.22   | 0.19 | SNP       |
| chr6_32793534_C_T     | 32793534 | 1.63 | 1.17 | 2.27 | 0.00349 | 0.06 | 0.10   | 0.05 | SNP       |
| chr6_33693760_C_G     | 33693760 | 0.76 | 0.63 | 0.91 | 0.00350 | 0.33 | 0.28   | 0.35 | SNP       |
| chr6_33627818_C_A     | 33627818 | 1.39 | 1.11 | 1.73 | 0.00352 | 0.20 | 0.26</ |      |           |

|                      |          |      |      |      |         |      |        |      |           |
|----------------------|----------|------|------|------|---------|------|--------|------|-----------|
| chr6_31473957_C_G    | 31473957 | 1.86 | 1.23 | 3.13 | 0.00467 | 0.12 | 0.13   | 0.12 | SNP       |
| chr6_31860337_C_T    | 31860337 | 1.42 | 1.11 | 1.81 | 0.00469 | 0.37 | 0.39   | 0.37 | SNP       |
| chr6_31322790_T_A    | 31322790 | 1.90 | 1.22 | 2.97 | 0.00469 | 0.12 | 0.13   | 0.12 | SNP       |
| chr6_32491581_A_C    | 32491581 | 1.41 | 1.11 | 1.80 | 0.00472 | 0.26 | 0.33   | 0.25 | SNP       |
| chr6_31499318_C_T    | 31499318 | 1.38 | 1.10 | 1.73 | 0.00481 | 0.27 | 0.35   | 0.27 | SNP       |
| chr6_31244230_C_A    | 31244230 | 1.62 | 1.16 | 2.27 | 0.00482 | 0.18 | 0.20   | 0.17 | SNP       |
| chr6_33052981_C_A    | 33052981 | 1.42 | 1.11 | 1.81 | 0.00482 | 0.11 | 0.13   | 0.11 | SNP       |
| chr6_31590009_A_T    | 31590009 | 0.56 | 0.37 | 0.83 | 0.00484 | 0.06 | 0.07   | 0.06 | SNP       |
| chr6_31507160_A_G    | 31507160 | 0.42 | 0.22 | 0.74 | 0.00484 | 0.03 | 0.02   | 0.04 | SNP       |
| chr6_31558702_C_T    | 31558702 | 2.02 | 1.23 | 3.29 | 0.00486 | 0.12 | 0.13   | 0.12 | SNP       |
| chr6_32161274_G_A    | 32161274 | 1.75 | 1.17 | 2.61 | 0.00504 | 0.16 | 0.02   | 0.16 | SNP       |
| chr6_32488960_A_G    | 32488960 | 1.58 | 1.14 | 2.16 | 0.00505 | 0.06 | 0.09   | 0.06 | SNP       |
| chr6_30879897_C_T    | 30879897 | 1.76 | 1.18 | 2.60 | 0.00508 | 0.12 | 0.13   | 0.11 | SNP       |
| chr6_31245131_C_G    | 31245131 | 1.43 | 1.15 | 1.85 | 0.00517 | 0.31 | 0.33   | 0.31 | SNP       |
| chr6_32151420_G_C    | 32151420 | 0.60 | 0.41 | 0.85 | 0.00523 | 0.06 | 0.04   | 0.07 | SNP       |
| chr6_32412580_C_T    | 32412580 | 1.40 | 1.10 | 1.78 | 0.00524 | 0.23 | 0.25   | 0.22 | SNP       |
| chr6_32161274_G_A    | 32161274 | 1.75 | 1.17 | 2.61 | 0.00528 | 0.03 | 0.05   | 0.03 | SNP       |
| chr6_32166380_C_G    | 32166380 | 1.75 | 1.17 | 2.57 | 0.00528 | 0.03 | 0.05   | 0.03 | SNP       |
| chr6_31837491_G_A    | 31837491 | 1.40 | 1.11 | 1.77 | 0.00529 | 0.49 | 0.50   | 0.49 | SNP       |
| chr6_31420060_G_T    | 31420060 | 1.89 | 1.20 | 2.94 | 0.00529 | 0.03 | 0.04   | 0.02 | SNP       |
| chr6_32340593_G_C    | 32340593 | 0.51 | 0.31 | 0.80 | 0.00529 | 0.04 | 0.02   | 0.05 | SNP       |
| chr6_33625696_T_C    | 33625696 | 1.35 | 1.09 | 1.67 | 0.00531 | 0.26 | 0.31   | 0.25 | SNP       |
| chr6_31500925_A_C    | 31500925 | 0.74 | 0.60 | 0.91 | 0.00531 | 0.29 | 0.15   | 0.20 | SNP       |
| chr6_31248256_C_T    | 31248256 | 0.51 | 0.31 | 0.80 | 0.00534 | 0.04 | 0.03   | 0.05 | SNP       |
| chr6_32785142_G_A    | 32785142 | 1.58 | 1.14 | 2.19 | 0.00538 | 0.06 | 0.10   | 0.05 | SNP       |
| chr6_29892196_T_C    | 29892196 | 1.28 | 1.08 | 1.53 | 0.00539 | 0.47 | 0.48   | 0.47 | SNP       |
| chr6_32826985_C_T    | 32826985 | 0.78 | 0.66 | 0.93 | 0.00545 | 0.43 | 0.39   | 0.44 | SNP       |
| chr6_32627480_G_A    | 32627480 | 1.38 | 1.10 | 1.72 | 0.00548 | 0.38 | 0.44   | 0.37 | SNP       |
| chr6_32490746_C_A    | 32490746 | 2.00 | 1.21 | 3.22 | 0.00549 | 0.02 | 0.02   | 0.02 | SNP       |
| chr6_33542523_T_C    | 33542523 | 1.29 | 1.08 | 1.55 | 0.00550 | 0.22 | 0.25   | 0.21 | SNP       |
| chr6_31084288_T_C    | 31084288 | 0.76 | 0.62 | 0.92 | 0.00560 | 0.48 | 0.45   | 0.49 | SNP       |
| chr6_31243935_T_C    | 31243935 | 1.13 | 1.09 | 1.67 | 0.00560 | 0.39 | 0.41   | 0.38 | SNP       |
| chr6_32134828_C_T    | 32134828 | 0.46 | 0.26 | 0.78 | 0.00564 | 0.04 | 0.02   | 0.05 | SNP       |
| chr6_32188713_C_G    | 32188713 | 0.48 | 0.28 | 0.79 | 0.00571 | 0.04 | 0.02   | 0.04 | SNP       |
| chr6_32080383_C_T    | 32080383 | 1.42 | 1.08 | 2.44 | 0.00574 | 0.28 | 0.86   | 0.29 | SNP       |
| chr6_32627446_C_T    | 32627446 | 1.70 | 1.16 | 2.47 | 0.00576 | 0.04 | 0.06   | 0.04 | SNP       |
| chr6_32611467_A_C    | 32611467 | 1.44 | 1.11 | 1.86 | 0.00576 | 0.19 | 0.26   | 0.17 | SNP       |
| chr6_32306922_T_C    | 32306922 | 1.77 | 1.17 | 2.64 | 0.00580 | 0.03 | 0.05   | 0.03 | SNP       |
| chr6_32012755_G_A    | 32012755 | 0.60 | 0.41 | 0.86 | 0.00587 | 0.03 | 0.05   | 0.09 | SNP       |
| chr6_32490747_T_A    | 32490747 | 1.98 | 1.21 | 3.20 | 0.00592 | 0.02 | 0.04   | 0.02 | SNP       |
| chr6_31243971_G_A    | 31243971 | 1.46 | 1.12 | 1.92 | 0.00592 | 0.32 | 0.33   | 0.32 | SNP       |
| chr6_30855211_T_G    | 30855211 | 1.73 | 1.17 | 2.60 | 0.00601 | 0.15 | 0.13   | 0.11 | SNP       |
| chr6_31243830_G_A    | 31243830 | 1.35 | 1.09 | 1.67 | 0.00603 | 0.39 | 0.41   | 0.38 | SNP       |
| HLA_2rfe4_D081_06_03 | 32627244 | 0.60 | 0.41 | 0.85 | 0.00617 | 0.08 | 0.05   | 0.09 | HLA (HLA) |
| chr6_32761447_T_A    | 32761447 | 0.41 | 0.20 | 0.74 | 0.00620 | 0.03 | 0.01   | 0.03 | SNP       |
| chr6_31730568_A_G    | 31730568 | 0.61 | 0.42 | 0.86 | 0.00623 | 0.07 | 0.05   | 0.08 | SNP       |
| chr6_32975478_T_C    | 32975478 | 1.32 | 1.08 | 1.62 | 0.00624 | 0.16 | 0.20   | 0.15 | SNP       |
| chr6_31161442_G_A    | 31161442 | 1.40 | 1.10 | 1.79 | 0.00625 | 0.10 | 0.09   | 0.27 | SNP       |
| chr6_32036357_G_A    | 32036357 | 0.65 | 0.47 | 0.88 | 0.00625 | 0.09 | 0.06   | 0.10 | SNP       |
| chr6_32409530_A_G    | 32409530 | 1.29 | 1.07 | 1.54 | 0.00629 | 0.40 | 0.42   | 0.39 | SNP       |
| chr6_31546498_C_T    | 31546498 | 1.29 | 1.07 | 1.55 | 0.00636 | 0.22 | 0.25   | 0.21 | SNP       |
| chr6_32375347_T_G    | 32375347 | 0.51 | 0.30 | 0.81 | 0.00638 | 0.04 | 0.02   | 0.04 | SNP       |
| chr6_32186050_G_A    | 32186050 | 1.34 | 1.09 | 1.66 | 0.00643 | 0.41 | 0.46   | 0.40 | SNP       |
| chr6_31894355_C_T    | 31894355 | 0.87 | 0.49 | 0.89 | 0.00659 | 0.10 | 0.08   | 0.10 | SNP       |
| chr6_32405671_C_A    | 32405671 | 1.31 | 1.08 | 1.59 | 0.00659 | 0.32 | 0.34   | 0.31 | SNP       |
| chr6_32825379_A_G    | 32825379 | 0.79 | 0.66 | 0.94 | 0.00663 | 0.45 | 0.42   | 0.46 | SNP       |
| chr6_32077380_C_T    | 32077380 | 1.79 | 1.45 | 2.87 | 0.00666 | 0.05 | 0.05   | 0.09 | SNP       |
| chr6_31324051_C_A    | 31324051 | 0.61 | 0.43 | 0.87 | 0.00667 | 0.09 | 0.07   | 0.09 | SNP       |
| chr6_32785841_C_T    | 32785841 | 1.56 | 1.13 | 2.14 | 0.00682 | 0.06 | 0.10   | 0.05 | SNP       |
| chr6_31709204_G_C    | 31709204 | 0.70 | 0.53 | 0.90 | 0.00683 | 0.12 | 0.17   | 0.22 | SNP       |
| chr6_3118942_T_C     | 3118942  | 1.39 | 1.09 | 1.77 | 0.00687 | 0.26 | 0.26   | 0.26 | SNP       |
| chr6_32369601_T_C    | 32369601 | 0.51 | 0.30 | 0.81 | 0.00689 | 0.04 | 0.02   | 0.04 | SNP       |
| chr6_32154385_A_G    | 32154385 | 0.66 | 0.49 | 0.88 | 0.00691 | 0.11 | 0.10   | 0.11 | SNP       |
| chr6_32489964_G_A    | 32489964 | 1.54 | 1.12 | 2.10 | 0.00695 | 0.06 | 0.09   | 0.06 | SNP       |
| chr6_29892615_C_T    | 29892615 | 0.80 | 0.68 | 0.94 | 0.00697 | 0.50 | 0.48   | 0.50 | SNP       |
| chr6_31115602_G_A    | 31115602 | 1.38 | 1.09 | 1.65 | 0.00699 | 0.12 | 0.13   | 0.26 | SNP       |
| chr6_32783405_C_T    | 32783405 | 1.55 | 1.13 | 2.14 | 0.00704 | 0.06 | 0.10   | 0.05 | SNP       |
| chr6_32304466_T_A    | 32304466 | 0.51 | 0.31 | 0.81 | 0.00707 | 0.04 | 0.02   | 0.05 | SNP       |
| chr6_32909980_C_T    | 32909980 | 1.28 | 1.07 | 1.54 | 0.00712 | 0.36 | 0.37   | 0.36 | SNP       |
| chr6_33596664_A_C    | 33596664 | 0.57 | 0.38 | 0.85 | 0.00717 | 0.05 | 0.04   | 0.06 | SNP       |
| chr6_30878857_G_A    | 30878857 | 1.54 | 1.12 | 2.10 | 0.00718 | 0.07 | 0.10   | 0.06 | SNP       |
| chr6_31804313_A_T    | 31804313 | 0.87 | 0.49 | 0.89 | 0.00719 | 0.06 | 0.04   | 0.06 | SNP       |
| chr6_33545340_G_A    | 33545340 | 0.75 | 0.60 | 0.92 | 0.00720 | 0.26 | 0.21   | 0.27 | SNP       |
| chr6_31324953_T_C    | 31324953 | 1.41 | 1.10 | 1.81 | 0.00736 | 0.37 | 0.40   | 0.37 | SNP       |
| chr6_31243979_A_T    | 31243979 | 1.45 | 1.10 | 1.90 | 0.00739 | 0.32 | 0.33   | 0.32 | SNP       |
| chr6_31127918_G_A    | 31127918 | 0.61 | 0.42 | 0.87 | 0.00741 | 0.08 | 0.05   | 0.09 | SNP       |
| chr6_31930351_A_G    | 31930351 | 0.55 | 0.35 | 0.84 | 0.00744 | 0.05 | 0.03   | 0.05 | SNP       |
| chr6_32052983_C_T    | 32052983 | 0.65 | 0.47 | 0.89 | 0.00745 | 0.09 | 0.06   | 0.10 | SNP       |
| chr6_31638811_C_T    | 31638811 | 1.63 | 1.13 | 2.32 | 0.00750 | 0.04 | 0.06   | 0.04 | SNP       |
| chr6_31110391_G_C    | 31110391 | 1.38 | 1.09 | 1.74 | 0.00751 | 0.26 | 0.26   | 0.26 | SNP       |
| chr6_29912308_T_C    | 29912308 | 1.28 | 1.07 | 1.54 | 0.00758 | 0.37 | 0.39   | 0.37 | SNP       |
| chr6_32200337_A_G    | 32200337 | 1.38 | 1.09 | 1.89 | 0.00759 | 0.10 | 0.12   | 0.30 | SNP       |
| chr6_31316076_G_A    | 31316076 | 1.43 | 1.10 | 1.85 | 0.00769 | 0.11 | 0.12   | 0.10 | SNP       |
| HLA_2rfe4_C08_04     | 31286256 | 0.71 | 0.55 | 0.91 | 0.00769 | 0.15 | 0.14   | 0.15 | HLA (HLA) |
| chr6_31085356_C_T    | 31085356 | 1.79 | 1.16 | 2.74 | 0.00772 | 0.12 | 0.13   | 0.12 | SNP       |
| chr6_32611034_T_A    | 32611034 | 1.35 | 1.08 | 1.68 | 0.00775 | 0.27 | 0.33   | 0.26 | SNP       |
| chr6_32007625_C_T    | 32007625 | 0.66 | 0.48 | 0.89 | 0.00791 | 0.10 | 0.07   | 0.10 | SNP       |
| chr6_31381459_A_G    | 31381459 | 0.50 | 0.28 | 0.81 | 0.00792 | 0.04 | 0.02   | 0.05 | SNP       |
| chr6_32323905_C_A    | 32323905 | 0.52 | 0.31 | 0.82 | 0.00795 | 0.04 | 0.02   | 0.05 | SNP       |
| chr6_32707585_G_A    | 32707585 | 0.70 | 0.54 | 0.91 | 0.00805 | 0.21 | 0.17   | 0.22 | SNP       |
| chr6_32553662_A_G    | 32553662 | 0.76 | 0.62 | 0.93 | 0.00812 | 0.38 | 0.34   | 0.40 | SNP       |
| chr6_32558284_T_C    | 32558284 | 0.64 | 0.45 | 0.88 | 0.00831 | 0.08 | 0.06   | 0.08 | SNP       |
| chr6_31248324_C_T    | 31248324 | 0.52 | 0.31 | 0.83 | 0.00833 | 0.04 | 0.03   | 0.05 | SNP       |
| chr6_31428927_T_C    | 31428927 | 1.51 | 1.11 | 2.05 | 0.00837 | 0.17 | 0.18   | 0.16 | SNP       |
| chr6_32604644_G_A    | 32604644 | 1.36 | 1.08 | 1.72 | 0.00840 | 0.28 | 0.35   | 0.27 | SNP       |
| chr6_31707526_G_A    | 31707526 | 1.80 | 1.15 | 2.78 | 0.00850 | 0.03 | 0.04   | 0.02 | SNP       |
| chr6_30796545_C_T    | 30796545 | 1.62 | 1.13 | 2.81 | 0.00862 | 0.12 | 0.13   | 0.12 | SNP       |
| chr6_29913099_G_A    | 29913099 | 0.48 | 0.27 | 0.81 | 0.00862 | 0.03 | 0.02   | 0.04 | SNP       |
| chr6_31236853_G_A    | 31236853 | 1.55 | 1.12 | 2.15 | 0.00878 | 0.18 | 0.19   | 0.17 | SNP       |
| chr6_32822975_C_T    | 32822975 | 0.80 | 0.67 | 0.94 | 0.00885 | 0.43 | 0.40   | 0.44 | SNP       |
| chr6_32974843_C_T    | 32974843 | 1.30 | 1.07 | 1.59 | 0.00893 | 0.16 | 0.20   | 0.15 | SNP       |
| chr6_3252698_G_T     | 3252698  | 0.76 | 0.61 | 0.93 | 0.00901 | 0.41 | 0.37   | 0.42 | SNP       |
| chr6_31267882_G_A    | 31267882 | 1.67 | 1.14 | 2.46 | 0.00904 | 0.12 | 0.13   | 0.12 | SNP       |
| chr6_32973599_C_T    | 32973599 | 1.30 | 1.07 | 1.59 | 0.00908 | 0.16 | 0.20   | 0.15 | SNP       |
| chr6_32823257_T_C    | 32823257 | 0.80 | 0.68 | 0.95 | 0.00908 | 0.45 | 0.42   | 0.46 | SNP       |
| chr6_29908338_C_T    | 29908338 | 1.21 | 1.06 | 1.62 | 0.00909 | 0.37 | 0.38   | 0.37 | SNP       |
| chr6_32085278_C_T    | 32085278 | 1.82 | 1.15 | 2.84 | 0.00916 | 0.03 | 0.04   | 0.03 | SNP       |
| chr6_32975257_C_T    | 32975257 | 1.25 | 1.06 | 1.48 | 0.00917 | 0.48 | 0.53   | 0.46 | SNP       |
| chr6_29895973_G_A    | 29895973 | 1.35 | 1.07 | 1.68 | 0.00918 | 0.12 | 0.13   | 0.17 | SNP       |
| chr6_32826450_T_C    | 32826450 | 0.79 | 0.66 | 0.94 | 0.00920 | 0.45 | 0.42   | 0.46 | SNP       |
| chr6_29896268_C_T    | 29896268 | 1.26 | 1.06 | 1.50 | 0.00921 | 0.44 | 0.46   | 0.43 | SNP       |
| HLA_2rfe4_D081_13_01 | 32545552 | 0.64 | 0.45 | 0.89 | 0.00921 | 0.08 | 0.06</ |      |           |

|                   |          |      |      |      |         |      |      |      |     |
|-------------------|----------|------|------|------|---------|------|------|------|-----|
| chr6_31712196_G_A | 31712196 | 1.91 | 1.16 | 3.14 | 0.01093 | 0.12 | 0.12 | 0.12 | SNP |
| chr6_31725230_G_A | 31725230 | 1.91 | 1.16 | 3.14 | 0.01093 | 0.12 | 0.12 | 0.12 | SNP |
| chr6_31726794_T_C | 31726794 | 1.91 | 1.16 | 3.14 | 0.01093 | 0.12 | 0.12 | 0.12 | SNP |
| chr6_32017522_G_A | 32017522 | 0.49 | 0.27 | 0.83 | 0.01105 | 0.04 | 0.02 | 0.04 | SNP |
| chr6_32052326_A_G | 32052326 | 1.43 | 1.08 | 1.87 | 0.01114 | 0.06 | 0.04 | 0.08 | SNP |
| chr6_31795345_G_A | 31795345 | 0.52 | 0.31 | 0.84 | 0.01115 | 0.04 | 0.02 | 0.04 | SNP |
| chr6_31546495_G_C | 31546495 | 1.76 | 1.13 | 2.70 | 0.01118 | 0.03 | 0.04 | 0.03 | SNP |
| chr6_31726523_T_C | 31726523 | 1.90 | 1.16 | 3.13 | 0.01119 | 0.13 | 0.11 | 0.12 | SNP |
| chr6_32822296_C_G | 32822296 | 0.80 | 0.67 | 0.95 | 0.01122 | 0.43 | 0.39 | 0.44 | SNP |
| chr6_32609476_T_C | 32609476 | 1.43 | 1.08 | 1.88 | 0.01124 | 0.08 | 0.10 | 0.07 | SNP |
| chr6_32541661_C_T | 32541661 | 1.26 | 1.05 | 1.51 | 0.01126 | 0.26 | 0.22 | 0.27 | SNP |
| chr6_29909472_C_G | 29909472 | 1.26 | 1.05 | 1.51 | 0.01127 | 0.37 | 0.38 | 0.37 | SNP |
| chr6_31113214_C_A | 31113214 | 0.77 | 0.63 | 0.94 | 0.01128 | 0.25 | 0.24 | 0.26 | SNP |
| chr6_31236989_T_C | 31236989 | 1.53 | 1.10 | 2.12 | 0.01129 | 0.18 | 0.19 | 0.17 | SNP |
| chr6_29910358_G_C | 29910358 | 1.28 | 1.06 | 1.55 | 0.01138 | 0.46 | 0.48 | 0.45 | SNP |
| chr6_32604974_C_T | 32604974 | 1.43 | 1.08 | 1.88 | 0.01140 | 0.08 | 0.10 | 0.07 | SNP |
| chr6_31712103_G_A | 31712103 | 1.93 | 1.16 | 3.21 | 0.01156 | 0.12 | 0.12 | 0.12 | SNP |
| chr6_33039535_A_T | 33039535 | 1.37 | 1.07 | 1.74 | 0.01158 | 0.11 | 0.12 | 0.11 | SNP |
| chr6_33046662_T_C | 33046662 | 0.77 | 0.63 | 0.94 | 0.01159 | 0.23 | 0.18 | 0.25 | SNP |
| chr6_31745464_G_A | 31745464 | 1.94 | 1.16 | 3.26 | 0.01168 | 0.12 | 0.12 | 0.12 | SNP |
| chr6_31248114_C_T | 31248114 | 0.54 | 0.33 | 0.86 | 0.01170 | 0.04 | 0.03 | 0.05 | SNP |
| chr6_31725285_A_G | 31725285 | 1.90 | 1.15 | 3.12 | 0.01170 | 0.12 | 0.12 | 0.12 | SNP |
| chr6_31085382_C_A | 31085382 | 0.79 | 0.66 | 0.95 | 0.01175 | 0.48 | 0.46 | 0.49 | SNP |
| chr6_32817008_C_T | 32817008 | 0.53 | 0.31 | 0.85 | 0.01177 | 0.04 | 0.02 | 0.04 | SNP |
| chr6_31593265_G_T | 31593265 | 0.62 | 0.42 | 0.89 | 0.01181 | 0.06 | 0.04 | 0.06 | SNP |
| chr6_31275560_T_C | 31275560 | 0.62 | 0.42 | 0.89 | 0.01193 | 0.07 | 0.05 | 0.07 | SNP |
| chr6_31601735_G_A | 31601735 | 0.60 | 0.40 | 0.88 | 0.01200 | 0.06 | 0.04 | 0.06 | SNP |
| chr6_31275691_A_C | 31275691 | 0.62 | 0.42 | 0.89 | 0.01203 | 0.07 | 0.05 | 0.07 | SNP |
| chr6_32974081_C_T | 32974081 | 1.23 | 1.05 | 1.45 | 0.01205 | 0.45 | 0.54 | 0.47 | SNP |
| chr6_31325056_C_T | 31325056 | 1.52 | 1.09 | 2.10 | 0.01211 | 0.15 | 0.16 | 0.15 | SNP |
| chr6_32606695_T_C | 32606695 | 0.70 | 0.52 | 0.92 | 0.01211 | 0.11 | 0.08 | 0.12 | SNP |
| chr6_32805505_C_A | 32805505 | 1.23 | 1.05 | 1.45 | 0.01217 | 0.36 | 0.40 | 0.34 | SNP |
| chr6_31110671_G_C | 31110671 | 0.77 | 0.63 | 0.94 | 0.01220 | 0.25 | 0.24 | 0.26 | SNP |
| chr6_31560565_C_T | 31560565 | 0.51 | 0.29 | 0.84 | 0.01227 | 0.03 | 0.02 | 0.04 | SNP |
| chr6_31632287_C_T | 31632287 | 1.33 | 1.06 | 1.66 | 0.01232 | 0.31 | 0.28 | 0.30 | SNP |
| chr6_31837277_A_C | 31837277 | 1.30 | 1.06 | 1.60 | 0.01232 | 0.49 | 0.49 | 0.49 | SNP |
| chr6_32707023_C_T | 32707023 | 0.70 | 0.52 | 0.92 | 0.01235 | 0.21 | 0.17 | 0.22 | SNP |
| chr6_29910383_G_A | 29910383 | 1.23 | 1.06 | 1.66 | 0.01238 | 0.18 | 0.19 | 0.17 | SNP |
| chr6_33548493_C_T | 33548493 | 0.78 | 1.64 | 0.95 | 0.01240 | 0.03 | 0.28 | 0.35 | SNP |
| chr6_32605689_G_A | 32605689 | 1.42 | 1.07 | 1.87 | 0.01250 | 0.08 | 0.10 | 0.07 | SNP |
| chr6_32707040_G_A | 32707040 | 0.70 | 0.58 | 0.92 | 0.01256 | 0.21 | 0.17 | 0.22 | SNP |
| chr6_32029183_C_T | 32029183 | 0.67 | 0.49 | 0.91 | 0.01261 | 0.59 | 0.07 | 0.10 | SNP |
| chr6_29913171_A_G | 29913171 | 1.26 | 1.05 | 1.51 | 0.01261 | 0.37 | 0.39 | 0.37 | SNP |
| chr6_32711050_C_T | 32711050 | 0.71 | 0.54 | 0.93 | 0.01267 | 0.21 | 0.17 | 0.21 | SNP |
| chr6_33548499_A_G | 33548499 | 1.24 | 1.05 | 1.47 | 0.01267 | 0.07 | 0.46 | 0.38 | SNP |
| chr6_29897759_A_G | 29897759 | 1.32 | 1.06 | 1.64 | 0.01274 | 0.20 | 0.21 | 0.19 | SNP |
| chr6_29868253_G_A | 29868253 | 1.40 | 1.07 | 1.82 | 0.01275 | 0.15 | 0.17 | 0.14 | SNP |
| chr6_31555381_A_G | 31555381 | 1.35 | 1.07 | 1.71 | 0.01278 | 0.21 | 0.26 | 0.22 | SNP |
| chr6_31236201_G_A | 31236201 | 1.38 | 1.07 | 1.78 | 0.01285 | 0.10 | 0.11 | 0.09 | SNP |
| chr6_32977044_G_A | 32977044 | 1.40 | 1.07 | 1.82 | 0.01287 | 0.09 | 0.10 | 0.09 | SNP |
| chr6_32610105_G_A | 32610105 | 1.43 | 1.07 | 1.89 | 0.01295 | 0.08 | 0.10 | 0.07 | SNP |
| chr6_32712666_T_C | 32712666 | 1.46 | 1.08 | 1.96 | 0.01299 | 0.14 | 0.15 | 0.14 | SNP |
| chr6_30229267_G_C | 30229267 | 1.58 | 1.10 | 2.27 | 0.01300 | 0.10 | 0.12 | 0.10 | SNP |
| chr6_29909153_T_C | 29909153 | 1.26 | 1.05 | 1.51 | 0.01306 | 0.37 | 0.38 | 0.37 | SNP |
| chr6_29909840_A_G | 29909840 | 1.25 | 1.05 | 1.48 | 0.01313 | 0.46 | 0.47 | 0.45 | SNP |
| chr6_29944706_G_A | 29944706 | 1.39 | 1.07 | 1.81 | 0.01329 | 0.14 | 0.16 | 0.14 | SNP |
| chr6_32785714_T_C | 32785714 | 1.20 | 1.06 | 1.61 | 0.01334 | 0.16 | 0.12 | 0.21 | SNP |
| chr6_29893403_C_G | 29893403 | 1.39 | 1.07 | 1.80 | 0.01340 | 0.15 | 0.17 | 0.15 | SNP |
| chr6_29758117_G_A | 29758117 | 1.32 | 1.06 | 1.64 | 0.01345 | 0.19 | 0.20 | 0.19 | SNP |
| chr6_32376882_T_C | 32376882 | 1.31 | 1.06 | 1.61 | 0.01347 | 0.48 | 0.53 | 0.47 | SNP |
| chr6_31751071_C_T | 31751071 | 1.75 | 1.11 | 2.71 | 0.01347 | 0.03 | 0.04 | 0.03 | SNP |
| chr6_31237950_C_T | 31237950 | 1.37 | 1.07 | 1.75 | 0.01354 | 0.36 | 0.38 | 0.36 | SNP |
| chr6_31627456_G_A | 31627456 | 1.39 | 1.06 | 1.61 | 0.01362 | 0.31 | 0.31 | 0.31 | SNP |
| chr6_31765984_G_A | 31765984 | 1.94 | 1.15 | 3.28 | 0.01362 | 0.12 | 0.12 | 0.12 | SNP |
| chr6_29896112_C_T | 29896112 | 1.40 | 1.07 | 1.83 | 0.01383 | 0.16 | 0.18 | 0.15 | SNP |
| chr6_32818130_G_A | 32818130 | 0.76 | 0.61 | 0.94 | 0.01384 | 0.19 | 0.19 | 0.19 | SNP |
| chr6_32819865_T_C | 32819865 | 0.73 | 0.57 | 0.93 | 0.01391 | 0.13 | 0.11 | 0.13 | SNP |
| chr6_33256471_C_T | 33256471 | 1.34 | 1.06 | 1.69 | 0.01392 | 0.13 | 0.15 | 0.12 | SNP |
| chr6_31205484_A_G | 31205484 | 1.29 | 1.06 | 1.61 | 0.01395 | 0.09 | 0.06 | 0.09 | SNP |
| chr6_31611777_C_T | 31611777 | 1.54 | 1.09 | 2.16 | 0.01403 | 0.19 | 0.20 | 0.19 | SNP |
| chr6_32375745_G_A | 32375745 | 1.30 | 1.06 | 1.61 | 0.01404 | 0.49 | 0.53 | 0.47 | SNP |
| chr6_32375618_C_T | 32375618 | 1.30 | 1.06 | 1.61 | 0.01404 | 0.49 | 0.53 | 0.47 | SNP |
| chr6_32627700_G_A | 32627700 | 0.75 | 0.59 | 0.94 | 0.01407 | 0.19 | 0.14 | 0.20 | SNP |
| chr6_33268737_C_A | 33268737 | 1.22 | 1.04 | 1.44 | 0.01419 | 0.36 | 0.41 | 0.34 | SNP |
| chr6_31607050_T_C | 31607050 | 1.53 | 1.09 | 2.13 | 0.01425 | 0.15 | 0.20 | 0.19 | SNP |
| chr6_32610330_A_T | 32610330 | 1.41 | 1.07 | 1.86 | 0.01425 | 0.08 | 0.10 | 0.07 | SNP |
| chr6_29768705_C_A | 29768705 | 1.30 | 1.05 | 1.60 | 0.01429 | 0.25 | 0.26 | 0.25 | SNP |
| chr6_29893040_T_C | 29893040 | 1.31 | 1.05 | 1.62 | 0.01430 | 0.15 | 0.21 | 0.19 | SNP |
| chr6_29852855_T_C | 29852855 | 1.33 | 1.06 | 1.66 | 0.01430 | 0.18 | 0.19 | 0.17 | SNP |
| chr6_32085317_C_G | 32085317 | 0.53 | 0.31 | 0.86 | 0.01438 | 0.04 | 0.02 | 0.04 | SNP |
| chr6_32559674_T_A | 32559674 | 1.43 | 1.07 | 1.91 | 0.01440 | 0.08 | 0.10 | 0.07 | SNP |
| chr6_32376471_A_C | 32376471 | 1.33 | 1.06 | 1.67 | 0.01444 | 0.16 | 0.12 | 0.12 | SNP |
| chr6_31636742_A_G | 31636742 | 1.87 | 1.13 | 3.10 | 0.01444 | 0.12 | 0.12 | 0.12 | SNP |
| chr6_32410987_G_A | 32410987 | 1.49 | 1.08 | 2.05 | 0.01445 | 0.17 | 0.18 | 0.17 | SNP |
| chr6_33365440_C_T | 33365440 | 1.34 | 1.06 | 1.69 | 0.01448 | 0.12 | 0.15 | 0.12 | SNP |
| chr6_32376932_C_T | 32376932 | 1.30 | 1.05 | 1.61 | 0.01469 | 0.49 | 0.53 | 0.47 | SNP |
| chr6_32976654_G_A | 32976654 | 1.39 | 1.06 | 1.81 | 0.01473 | 0.09 | 0.10 | 0.09 | SNP |
| chr6_29786510_T_C | 29786510 | 1.32 | 1.05 | 1.64 | 0.01487 | 0.19 | 0.19 | 0.17 | SNP |
| chr6_32636521_G_A | 32636521 | 1.34 | 1.06 | 1.69 | 0.01489 | 0.17 | 0.22 | 0.16 | SNP |
| chr6_30851909_C_A | 30851909 | 1.72 | 1.11 | 2.65 | 0.01493 | 0.13 | 0.15 | 0.12 | SNP |
| chr6_29933750_G_T | 29933750 | 1.39 | 1.06 | 1.81 | 0.01494 | 0.14 | 0.16 | 0.14 | SNP |
| chr6_31240353_C_A | 31240353 | 1.50 | 1.08 | 2.08 | 0.01494 | 0.18 | 0.19 | 0.17 | SNP |
| chr6_31240663_A_T | 31240663 | 1.50 | 1.08 | 2.08 | 0.01494 | 0.18 | 0.19 | 0.17 | SNP |
| chr6_32362408_G_A | 32362408 | 0.72 | 0.54 | 0.93 | 0.01502 | 0.15 | 0.11 | 0.16 | SNP |
| chr6_29712866_C_T | 29712866 | 1.37 | 1.06 | 1.75 | 0.01526 | 0.19 | 0.20 | 0.18 | SNP |
| chr6_31727474_A_G | 31727474 | 1.86 | 1.12 | 3.08 | 0.01547 | 0.12 | 0.12 | 0.12 | SNP |
| chr6_29909751_C_T | 29909751 | 1.24 | 1.04 | 1.61 | 0.01552 | 0.46 | 0.47 | 0.46 | SNP |
| chr6_32559216_G_A | 32559216 | 1.29 | 1.05 | 1.58 | 0.01555 | 0.38 | 0.38 | 0.38 | SNP |
| chr6_29720604_G_A | 29720604 | 1.36 | 1.06 | 1.74 | 0.01556 | 0.20 | 0.21 | 0.20 | SNP |
| chr6_31702710_C_T | 31702710 | 0.63 | 0.43 | 0.86 | 0.01574 | 0.06 | 0.04 | 0.06 | SNP |
| chr6_31830593_A_C | 31830593 | 0.52 | 0.29 | 0.86 | 0.01576 | 0.04 | 0.03 | 0.05 | SNP |
| chr6_29945949_G_A | 29945949 | 1.47 | 1.07 | 2.00 | 0.01586 | 0.11 | 0.12 | 0.11 | SNP |
| chr6_32821861_G_G | 32821861 | 0.54 | 0.32 | 0.87 | 0.01586 | 0.68 | 0.02 | 0.04 | SNP |
| chr6_33382241_T_C | 33382241 | 1.21 | 1.04 | 1.42 | 0.01590 | 0.41 | 0.46 | 0.40 | SNP |
| chr6_32974401_G_T | 32974401 | 1.22 | 1.04 | 1.44 | 0.01594 | 0.48 | 0.54 | 0.47 | SNP |
| chr6_29972384_G_A | 29972384 | 1.27 | 1.05 | 1.55 | 0.01596 | 0.28 | 0.28 | 0.28 | SNP |
| chr6_32603729_A_G | 32603729 | 1.41 | 1.06 | 1.85 | 0.01602 | 0.08 | 0.10 | 0.08 | SNP |
| chr6_32501211_G_A | 32501211 | 1.41 | 1.07 | 1.87 | 0.01606 | 0.19 | 0.21 | 0.19 | SNP |
| chr6_29906800_C_A | 29906800 | 1.42 | 1.04 | 1.47 | 0.01612 | 0.49 | 0.50 | 0.49 | SNP |
| chr6_31462135_G_A | 31462135 | 1.93 | 1.13 | 3.29 | 0.01616 | 0.13 | 0.14 | 0.12 | SNP |
| chr6_31851354_G_A | 31851354 | 0.54 | 0.32 | 0.87 | 0.01617 | 0.04 | 0.03 | 0.05 | SNP |
| chr6_31521596_T_C | 31521596 | 1.23 | 1.05 | 1.47 | 0.01623 | 0.36 | 0.43 | 0.34 | SNP |
| chr6_31624864_A_G | 31624864 | 1.91 | 1.13 | 3.23 | 0.01626 | 0.12 | 0.12 | 0.12 | SNP |
| chr6_319          |          |      |      |      |         |      |      |      |     |

|                   |          |      |      |      |         |      |      |      |           |
|-------------------|----------|------|------|------|---------|------|------|------|-----------|
| chr6_32825507_C_T | 32825507 | 0.80 | 0.66 | 0.96 | 0.01931 | 0.36 | 0.32 | 0.37 | SNP       |
| chr6_3173650_G_A  | 3173650  | 0.63 | 0.42 | 0.92 | 0.01935 | 0.06 | 0.04 | 0.06 | SNP       |
| chr6_32606266_T_C | 32606266 | 1.39 | 1.05 | 1.83 | 0.01937 | 0.08 | 0.10 | 0.08 | SNP       |
| chr6_32522703_T_G | 32522703 | 0.78 | 0.63 | 0.96 | 0.01965 | 0.40 | 0.37 | 0.41 | SNP       |
| chr6_32911830_C_T | 32911830 | 1.29 | 1.04 | 1.60 | 0.01972 | 0.10 | 0.20 | 0.18 | SNP       |
| chr6_32973281_C_T | 32973281 | 1.21 | 1.03 | 1.42 | 0.01990 | 0.48 | 0.50 | 0.47 | SNP       |
| chr6_31918860_A_G | 31918860 | 1.80 | 1.10 | 2.94 | 0.01992 | 0.12 | 0.12 | 0.12 | SNP       |
| chr6_32857730_C_G | 32857730 | 1.29 | 1.04 | 1.59 | 0.01992 | 0.18 | 0.18 | 0.18 | SNP       |
| chr6_32052444_C_T | 32052444 | 0.57 | 0.34 | 0.90 | 0.01993 | 0.04 | 0.03 | 0.04 | SNP       |
| chr6_32359142_A_G | 32359142 | 1.24 | 1.03 | 1.50 | 0.02005 | 0.40 | 0.45 | 0.39 | SNP       |
| chr6_32725932_A_G | 32725932 | 1.24 | 1.03 | 1.50 | 0.02009 | 0.37 | 0.39 | 0.36 | SNP       |
| chr6_32710466_G_T | 32710466 | 1.24 | 1.03 | 1.50 | 0.02009 | 0.37 | 0.39 | 0.36 | SNP       |
| chr6_31607952_G_A | 31607952 | 0.64 | 0.44 | 0.92 | 0.02017 | 0.06 | 0.04 | 0.06 | SNP       |
| chr6_31546825_C_T | 31546825 | 1.22 | 1.03 | 1.45 | 0.02023 | 0.40 | 0.45 | 0.39 | SNP       |
| chr6_31248995_C_T | 31248995 | 0.57 | 0.35 | 0.90 | 0.02034 | 0.05 | 0.03 | 0.05 | SNP       |
| chr6_32035427_T_C | 32035427 | 0.69 | 0.50 | 0.94 | 0.02042 | 0.09 | 0.07 | 0.10 | SNP       |
| chr6_32005048_C_G | 32005048 | 0.57 | 0.34 | 0.90 | 0.02050 | 0.04 | 0.03 | 0.04 | SNP       |
| chr6_32633415_C_T | 32633415 | 1.38 | 1.05 | 1.80 | 0.02061 | 0.16 | 0.17 | 0.16 | SNP       |
| chr6_32725271_G_A | 32725271 | 0.73 | 0.56 | 0.95 | 0.02062 | 0.21 | 0.18 | 0.22 | SNP       |
| chr6_32782605_C_T | 32782605 | 1.25 | 1.04 | 1.52 | 0.02062 | 0.37 | 0.40 | 0.36 | SNP       |
| chr6_32032421_C_T | 32032421 | 0.69 | 0.50 | 0.94 | 0.02066 | 0.11 | 0.08 | 0.12 | SNP       |
| chr6_31241933_A_C | 31241933 | 1.42 | 1.05 | 1.89 | 0.02068 | 0.07 | 0.10 | 0.07 | SNP       |
| chr6_31465917_G_T | 31465917 | 1.68 | 1.07 | 2.58 | 0.02087 | 0.03 | 0.04 | 0.03 | SNP       |
| chr6_32362741_C_T | 32362741 | 0.72 | 0.55 | 0.95 | 0.02094 | 0.15 | 0.11 | 0.16 | SNP       |
| chr6_32362745_G_A | 32362745 | 0.72 | 0.55 | 0.95 | 0.02094 | 0.15 | 0.11 | 0.16 | SNP       |
| chr6_31181511_T_G | 31181511 | 0.79 | 0.64 | 0.96 | 0.02097 | 0.25 | 0.24 | 0.25 | SNP       |
| chr6_32803408_T_A | 32803408 | 1.70 | 1.07 | 2.65 | 0.02117 | 0.03 | 0.04 | 0.02 | SNP       |
| chr6_31238632_C_T | 31238632 | 0.77 | 0.61 | 0.96 | 0.02119 | 0.21 | 0.21 | 0.21 | SNP       |
| chr6_32895626_G_A | 32895626 | 1.23 | 1.04 | 1.74 | 0.02176 | 0.04 | 0.03 | 0.04 | SNP       |
| chr6_29943039_G_T | 29943039 | 0.57 | 0.35 | 0.90 | 0.02155 | 0.04 | 0.03 | 0.04 | SNP       |
| chr6_32382943_T_G | 32382943 | 1.38 | 1.05 | 1.82 | 0.02155 | 0.10 | 0.11 | 0.09 | SNP       |
| chr6_32060791_G_A | 32060791 | 0.57 | 0.34 | 0.90 | 0.02176 | 0.04 | 0.03 | 0.04 | SNP       |
| chr6_32806673_T_C | 32806673 | 0.57 | 0.35 | 0.90 | 0.02185 | 0.04 | 0.02 | 0.04 | SNP       |
| HLA_DPB1_02       | 33043767 | 1.33 | 1.04 | 1.70 | 0.02199 | 0.11 | 0.12 | 0.11 | HLA (HLA) |
| chr6_31658393_C_G | 31658393 | 1.25 | 1.04 | 1.65 | 0.02203 | 0.13 | 0.11 | 0.11 | SNP       |
| chr6_29909440_A_G | 29909440 | 0.71 | 0.52 | 0.94 | 0.02209 | 0.09 | 0.07 | 0.10 | SNP       |
| chr6_32412395_A_C | 32412395 | 1.29 | 1.04 | 1.61 | 0.02218 | 0.25 | 0.26 | 0.24 | SNP       |
| chr6_32611860_G_A | 32611860 | 1.43 | 1.05 | 1.94 | 0.02238 | 0.18 | 0.19 | 0.18 | SNP       |
| chr6_31260193_A_G | 31260193 | 1.65 | 1.06 | 2.53 | 0.02246 | 0.04 | 0.04 | 0.03 | SNP       |
| chr6_29909916_T_A | 29909916 | 1.24 | 1.03 | 1.99 | 0.02256 | 0.39 | 0.40 | 0.39 | SNP       |
| chr6_31919578_G_A | 31919578 | 0.77 | 0.62 | 0.96 | 0.02258 | 0.48 | 0.44 | 0.49 | SNP       |
| chr6_32797466_G_A | 32797466 | 1.44 | 1.05 | 1.95 | 0.02261 | 0.08 | 0.12 | 0.07 | SNP       |
| chr6_29909454_T_C | 29909454 | 0.71 | 0.52 | 0.95 | 0.02261 | 0.09 | 0.07 | 0.10 | SNP       |
| chr6_32063896_G_A | 32063896 | 0.52 | 0.28 | 0.89 | 0.02279 | 0.04 | 0.02 | 0.04 | SNP       |
| chr6_31559153_G_A | 31559153 | 1.52 | 1.06 | 2.17 | 0.02280 | 0.18 | 0.19 | 0.17 | SNP       |
| chr6_31601344_C_T | 31601344 | 0.73 | 0.55 | 0.95 | 0.02281 | 0.29 | 0.25 | 0.30 | SNP       |
| chr6_32029849_G_A | 32029849 | 0.69 | 0.49 | 0.94 | 0.02282 | 0.09 | 0.07 | 0.10 | SNP       |
| chr6_32029849_G_A | 32029849 | 0.69 | 0.49 | 0.94 | 0.02282 | 0.09 | 0.07 | 0.10 | SNP       |
| chr6_32362702_T_C | 32362702 | 0.73 | 0.55 | 0.95 | 0.02314 | 0.15 | 0.11 | 0.16 | SNP       |
| chr6_32362703_G_T | 32362703 | 0.73 | 0.55 | 0.95 | 0.02314 | 0.15 | 0.11 | 0.16 | SNP       |
| chr6_29909197_C_G | 29909197 | 1.29 | 1.03 | 1.61 | 0.02316 | 0.18 | 0.19 | 0.18 | SNP       |
| chr6_32974934_G_A | 32974934 | 1.23 | 1.03 | 1.47 | 0.02317 | 0.28 | 0.32 | 0.27 | SNP       |
| chr6_31244068_A_G | 31244068 | 1.47 | 1.05 | 2.05 | 0.02332 | 0.18 | 0.19 | 0.18 | SNP       |
| chr6_32608217_T_C | 32608217 | 1.53 | 1.05 | 2.20 | 0.02338 | 0.04 | 0.06 | 0.04 | SNP       |
| chr6_32604924_C_T | 32604924 | 1.37 | 1.04 | 1.80 | 0.02349 | 0.08 | 0.10 | 0.07 | SNP       |
| chr6_32490708_A_C | 32490708 | 2.01 | 1.08 | 3.63 | 0.02350 | 0.02 | 0.03 | 0.01 | SNP       |
| chr6_32603897_G_A | 32603897 | 1.28 | 1.04 | 1.82 | 0.02365 | 0.08 | 0.10 | 0.07 | SNP       |
| chr6_29908667_G_A | 29908667 | 1.28 | 1.03 | 1.59 | 0.02370 | 0.19 | 0.20 | 0.18 | SNP       |
| chr6_29892104_A_G | 29892104 | 1.21 | 1.03 | 1.44 | 0.02378 | 0.48 | 0.49 | 0.48 | SNP       |
| chr6_29913042_T_G | 29913042 | 1.29 | 1.03 | 1.61 | 0.02380 | 0.16 | 0.19 | 0.18 | SNP       |
| chr6_31321238_G_C | 31321238 | 1.54 | 1.05 | 2.23 | 0.02396 | 0.04 | 0.05 | 0.04 | SNP       |
| chr6_32802807_C_T | 32802807 | 0.74 | 0.56 | 0.96 | 0.02404 | 0.15 | 0.11 | 0.16 | SNP       |
| chr6_31935657_G_A | 31935657 | 1.60 | 1.08 | 2.17 | 0.02407 | 0.03 | 0.03 | 0.05 | SNP       |
| HLA_HME_C_02_02   | 31236526 | 0.62 | 0.40 | 0.92 | 0.02411 | 0.06 | 0.04 | 0.06 | HLA (HLA) |
| chr6_29913672_A_G | 29913672 | 1.28 | 1.03 | 1.59 | 0.02407 | 0.19 | 0.20 | 0.19 | SNP       |
| chr6_31856178_T_C | 31856178 | 1.23 | 1.04 | 1.71 | 0.02418 | 0.18 | 0.18 | 0.18 | SNP       |
| chr6_31837250_A_G | 31837250 | 1.27 | 1.03 | 1.56 | 0.02426 | 0.49 | 0.49 | 0.49 | SNP       |
| chr6_31244181_T_C | 31244181 | 1.47 | 1.05 | 2.07 | 0.02429 | 0.18 | 0.19 | 0.17 | SNP       |
| chr6_31232131_C_T | 31232131 | 0.80 | 0.66 | 0.97 | 0.02432 | 0.27 | 0.23 | 0.28 | SNP       |
| chr6_31600106_C_A | 31600106 | 0.52 | 0.28 | 0.89 | 0.02434 | 0.03 | 0.02 | 0.03 | SNP       |
| chr6_29909181_C_A | 29909181 | 1.28 | 1.03 | 1.59 | 0.02439 | 0.19 | 0.20 | 0.18 | SNP       |
| chr6_29909179_G_A | 29909179 | 1.21 | 1.02 | 1.43 | 0.02460 | 0.47 | 0.48 | 0.46 | SNP       |
| chr6_32975511_G_A | 32975511 | 0.81 | 0.67 | 0.97 | 0.02464 | 0.32 | 0.29 | 0.33 | SNP       |
| chr6_31112108_G_T | 31112108 | 1.31 | 1.03 | 1.67 | 0.02469 | 0.27 | 0.27 | 0.27 | SNP       |
| chr6_3269520_C_A  | 3269520  | 1.28 | 1.04 | 1.82 | 0.02475 | 0.08 | 0.10 | 0.08 | SNP       |
| chr6_32362669_T_C | 32362669 | 0.74 | 0.56 | 0.96 | 0.02479 | 0.05 | 0.11 | 0.16 | SNP       |
| chr6_32710695_T_G | 32710695 | 0.72 | 0.54 | 0.95 | 0.02485 | 0.11 | 0.08 | 0.11 | SNP       |
| chr6_32444094_G_C | 32444094 | 1.35 | 1.04 | 1.74 | 0.02498 | 0.09 | 0.12 | 0.08 | SNP       |
| chr6_29856194_G_C | 29856194 | 1.42 | 1.04 | 1.92 | 0.02500 | 0.15 | 0.19 | 0.14 | SNP       |
| chr6_32056580_A_C | 32056580 | 0.70 | 0.50 | 0.95 | 0.02509 | 0.09 | 0.07 | 0.10 | SNP       |
| chr6_32638046_G_A | 32638046 | 0.73 | 0.55 | 0.96 | 0.02515 | 0.14 | 0.12 | 0.15 | SNP       |
| chr6_32627795_G_G | 32627795 | 1.24 | 1.03 | 1.73 | 0.02528 | 0.04 | 0.02 | 0.04 | SNP       |
| chr6_32814244_A_T | 32814244 | 0.74 | 0.56 | 0.96 | 0.02538 | 0.10 | 0.09 | 0.11 | SNP       |
| chr6_32707508_T_C | 32707508 | 0.73 | 0.55 | 0.96 | 0.02548 | 0.10 | 0.08 | 0.11 | SNP       |
| chr6_32707509_G_A | 32707509 | 0.73 | 0.55 | 0.96 | 0.02548 | 0.10 | 0.08 | 0.11 | SNP       |
| chr6_32708890_A_G | 32708890 | 0.73 | 0.55 | 0.96 | 0.02550 | 0.10 | 0.08 | 0.11 | SNP       |
| chr6_32708413_G_A | 32708413 | 0.73 | 0.55 | 0.96 | 0.02552 | 0.10 | 0.08 | 0.11 | SNP       |
| chr6_31231430_G_A | 31231430 | 1.24 | 1.03 | 1.50 | 0.02559 | 0.46 | 0.51 | 0.47 | SNP       |
| chr6_31237917_C_T | 31237917 | 0.77 | 0.61 | 0.97 | 0.02562 | 0.21 | 0.21 | 0.21 | SNP       |
| chr6_29910721_G_C | 29910721 | 0.69 | 0.49 | 0.95 | 0.02571 | 0.11 | 0.08 | 0.11 | SNP       |
| chr6_31464091_G_A | 31464091 | 1.65 | 1.05 | 2.54 | 0.02572 | 0.03 | 0.04 | 0.03 | SNP       |
| chr6_31474820_C_T | 31474820 | 1.65 | 1.05 | 2.54 | 0.02572 | 0.03 | 0.04 | 0.03 | SNP       |
| chr6_31244082_C_T | 31244082 | 1.35 | 1.03 | 1.74 | 0.02572 | 0.10 | 0.11 | 0.09 | SNP       |
| chr6_32707644_G_A | 32707644 | 0.73 | 0.55 | 0.96 | 0.02575 | 0.10 | 0.08 | 0.11 | SNP       |
| chr6_32707638_C_T | 32707638 | 0.73 | 0.55 | 0.96 | 0.02575 | 0.10 | 0.08 | 0.11 | SNP       |
| chr6_32707641_C_A | 32707641 | 0.73 | 0.55 | 0.96 | 0.02575 | 0.10 | 0.08 | 0.11 | SNP       |
| chr6_32707740_T_C | 32707740 | 0.73 | 0.55 | 0.96 | 0.02575 | 0.10 | 0.08 | 0.11 | SNP       |
| chr6_32707783_A_G | 32707783 | 0.73 | 0.55 | 0.96 | 0.02575 | 0.10 | 0.08 | 0.11 | SNP       |
| chr6_32708798_T_C | 32708798 | 0.73 | 0.55 | 0.96 | 0.02575 | 0.10 | 0.08 | 0.11 | SNP       |
| chr6_32709179_G_A | 32709179 | 0.73 | 0.55 | 0.96 | 0.02575 | 0.10 | 0.08 | 0.11 | SNP       |
| chr6_32709586_G_A | 32709586 | 0.73 | 0.55 | 0.96 | 0.02575 | 0.10 | 0.08 | 0.11 | SNP       |
| chr6_32709738_A_G | 32709738 | 0.73 | 0.55 | 0.96 | 0.02575 | 0.10 | 0.08 | 0.11 | SNP       |
| chr6_29911727_C_G | 29911727 | 1.28 | 1.03 | 1.65 | 0.02575 | 0.19 | 0.20 | 0.19 | SNP       |
| chr6_32604544_C_T | 32604544 | 1.29 | 1.03 | 1.60 | 0.02580 | 0.32 | 0.33 | 0.31 | SNP       |
| chr6_31239681_T_A | 31239681 | 1.33 | 1.03 | 1.71 | 0.02585 | 0.41 | 0.43 | 0.40 | SNP       |
| chr6_32377061_C_T | 32377061 | 1.28 | 1.02 | 1.59 | 0.02592 | 0.48 | 0.52 | 0.47 | SNP       |
| chr6_31948400_T_G | 31948400 | 0.58 | 0.35 | 0.92 | 0.02595 | 0.04 | 0.03 | 0.04 | SNP       |
| chr6_32811629_G_C | 32811629 | 1.32 | 1.03 | 1.69 | 0.02595 | 0.14 | 0.19 | 0.13 | SNP       |
| HLA_HME_C_07_04   | 31238520 | 0.44 | 0.20 | 0.86 | 0.02595 | 0.02 | 0.03 | 0.02 | HLA (HLA) |
| chr6_29913948_T_G | 29913948 | 1.23 | 1.03 | 1.48 | 0.02601 | 0.38 | 0.39 | 0.38 | SNP       |
| chr6_29913944_C_T | 29913944 | 1.23 | 1.02 | 1.48 | 0.02624 | 0.38 | 0.39 | 0.38 | SNP       |
| chr6_29929305_C_G | 29929305 | 1.27 | 1.03 | 1.57 | 0.02628 | 0.20 | 0.21 | 0.20 | SNP       |
| chr6_313250       |          |      |      |      |         |      |      |      |           |

|                     |          |      |      |      |         |      |      |      |           |
|---------------------|----------|------|------|------|---------|------|------|------|-----------|
| chr6_33480044_C_A   | 33480044 | 0.79 | 0.64 | 0.98 | 0.03163 | 0.50 | 0.44 | 0.51 | SNP       |
| chr6_31675501_G_C   | 31675501 | 0.69 | 0.48 | 0.96 | 0.03182 | 0.07 | 0.05 | 0.07 | SNP       |
| chr6_32707173_T_G   | 32707173 | 0.74 | 0.55 | 0.97 | 0.03221 | 0.10 | 0.08 | 0.11 | SNP       |
| chr6_31906828_G_A   | 31906828 | 0.60 | 0.37 | 0.94 | 0.03223 | 0.04 | 0.03 | 0.04 | SNP       |
| chr6_32170706_T_C   | 32170706 | 1.21 | 1.02 | 1.45 | 0.03238 | 0.38 | 0.41 | 0.38 | SNP       |
| chr6_32501245_A_G   | 32501245 | 0.80 | 0.65 | 0.98 | 0.03243 | 0.19 | 0.16 | 0.20 | SNP       |
| chr6_29855802_A_G   | 29855802 | 1.36 | 1.02 | 1.81 | 0.03261 | 0.15 | 0.16 | 0.14 | SNP       |
| chr6_29244889_C_A   | 29244889 | 0.81 | 0.67 | 0.98 | 0.03265 | 0.40 | 0.40 | 0.40 | SNP       |
| chr6_32945843_T_A   | 32945843 | 1.85 | 1.03 | 3.22 | 0.03268 | 0.02 | 0.02 | 0.01 | SNP       |
| chr6_29895913_G_A   | 29895913 | 0.83 | 0.70 | 0.98 | 0.03273 | 0.45 | 0.44 | 0.45 | SNP       |
| chr6_29510286_T_C   | 29510286 | 1.27 | 1.02 | 1.54 | 0.03278 | 0.19 | 0.20 | 0.19 | SNP       |
| chr6_32797309_T_G   | 32797309 | 1.38 | 1.02 | 1.85 | 0.03280 | 0.08 | 0.12 | 0.07 | SNP       |
| chr6_32300470_T_G   | 32300470 | 0.79 | 0.63 | 0.98 | 0.03280 | 0.40 | 0.40 | 0.40 | SNP       |
| chr6_29857852_G_A   | 29857852 | 1.25 | 1.02 | 1.54 | 0.03288 | 0.19 | 0.20 | 0.18 | SNP       |
| chr6_33272677_C_T   | 33272677 | 1.35 | 1.02 | 1.78 | 0.03299 | 0.08 | 0.09 | 0.07 | SNP       |
| chr6_32549259_A_G   | 32549259 | 1.39 | 1.03 | 1.89 | 0.03327 | 0.18 | 0.19 | 0.18 | SNP       |
| chr6_31613991_C_A   | 31613991 | 1.45 | 1.03 | 2.03 | 0.03328 | 0.20 | 0.20 | 0.19 | SNP       |
| chr6_32707282_C_T   | 32707282 | 1.21 | 1.02 | 1.45 | 0.03342 | 0.38 | 0.41 | 0.38 | SNP       |
| chr6_32556030_T_C   | 32556030 | 1.41 | 1.03 | 1.94 | 0.03346 | 0.17 | 0.18 | 0.17 | SNP       |
| chr6_31594628_A_T   | 31594628 | 1.49 | 1.03 | 2.15 | 0.03404 | 0.18 | 0.19 | 0.18 | SNP       |
| chr6_29796768_C_T   | 29796768 | 1.25 | 1.02 | 1.52 | 0.03412 | 0.22 | 0.23 | 0.21 | SNP       |
| chr6_32094314_C_T   | 29945214 | 1.21 | 1.01 | 1.44 | 0.03413 | 0.46 | 0.47 | 0.46 | SNP       |
| chr6_31240041_T_C   | 31240041 | 1.26 | 1.02 | 1.57 | 0.03415 | 0.41 | 0.41 | 0.41 | SNP       |
| chr6_29891825_T_C   | 29891825 | 1.20 | 1.01 | 1.42 | 0.03417 | 0.48 | 0.48 | 0.48 | SNP       |
| chr6_32362433_C_A   | 32362433 | 0.75 | 0.57 | 0.98 | 0.03435 | 0.15 | 0.11 | 0.16 | SNP       |
| chr6_29914034_A_G   | 29914034 | 1.23 | 1.02 | 1.49 | 0.03437 | 0.39 | 0.40 | 0.39 | SNP       |
| chr6_31709778_A_G   | 31709778 | 1.21 | 1.04 | 1.80 | 0.03438 | 0.12 | 0.12 | 0.12 | SNP       |
| chr6_31947460_T_G   | 31947460 | 1.35 | 1.02 | 1.79 | 0.03456 | 0.34 | 0.34 | 0.34 | SNP       |
| chr6_31320562_C_T   | 31320562 | 1.36 | 1.02 | 1.82 | 0.03461 | 0.19 | 0.21 | 0.19 | SNP       |
| chr6_32362453_A_G   | 32362453 | 0.75 | 0.57 | 0.98 | 0.03468 | 0.15 | 0.11 | 0.16 | SNP       |
| chr6_32362639_G_A   | 32362639 | 0.75 | 0.57 | 0.98 | 0.03471 | 0.15 | 0.11 | 0.16 | SNP       |
| chr6_32709346_T_C   | 32709346 | 1.21 | 1.01 | 1.44 | 0.03493 | 0.38 | 0.41 | 0.38 | SNP       |
| chr6_32550761_G_A   | 32550761 | 0.80 | 0.65 | 0.98 | 0.03519 | 0.34 | 0.31 | 0.35 | SNP       |
| chr6_31241002_A_G   | 31241002 | 1.32 | 1.02 | 1.69 | 0.03535 | 0.10 | 0.11 | 0.10 | SNP       |
| chr6_32134656_T_C   | 32134656 | 1.43 | 1.02 | 2.00 | 0.03548 | 0.19 | 0.21 | 0.18 | SNP       |
| chr6_29908676_T_A   | 29908676 | 1.36 | 1.02 | 1.82 | 0.03554 | 0.14 | 0.15 | 0.14 | SNP       |
| chr6_31240871_G_C   | 31240871 | 0.81 | 0.66 | 0.99 | 0.03555 | 0.09 | 0.36 | 0.35 | SNP       |
| chr6_29854703_G_A   | 29854703 | 1.25 | 1.01 | 1.53 | 0.03565 | 0.19 | 0.20 | 0.18 | SNP       |
| chr6_29689164_T_A   | 29689164 | 1.25 | 1.01 | 1.53 | 0.03568 | 0.20 | 0.21 | 0.20 | SNP       |
| chr6_31929014_C_A   | 31929014 | 1.33 | 1.02 | 1.74 | 0.03579 | 0.24 | 0.24 | 0.24 | SNP       |
| chr6_31604894_C_T   | 31604894 | 1.70 | 1.02 | 2.76 | 0.03587 | 0.02 | 0.03 | 0.02 | SNP       |
| chr6_31803130_C_T   | 31803130 | 0.60 | 0.37 | 0.95 | 0.03588 | 0.04 | 0.03 | 0.04 | SNP       |
| chr6_31203138_G_A   | 31203138 | 1.44 | 1.02 | 2.03 | 0.03600 | 0.17 | 0.18 | 0.16 | SNP       |
| chr6_31366472_C_T   | 31366472 | 1.47 | 1.02 | 2.10 | 0.03615 | 0.18 | 0.18 | 0.18 | SNP       |
| chr6_31237087_C_A   | 31237087 | 1.31 | 1.01 | 1.69 | 0.03626 | 0.10 | 0.11 | 0.10 | SNP       |
| chr6_31850913_T_C   | 31850913 | 0.63 | 0.40 | 0.96 | 0.03674 | 0.09 | 0.03 | 0.05 | SNP       |
| chr6_33545125_A_G   | 33545125 | 1.23 | 1.01 | 1.50 | 0.03679 | 0.21 | 0.24 | 0.20 | SNP       |
| HLA_2H6E_C06_02     | 31236526 | 1.39 | 1.01 | 1.90 | 0.03694 | 0.06 | 0.08 | 0.06 | HLA (HLA) |
| chr6_30515043_T_C   | 30515043 | 1.41 | 1.02 | 1.92 | 0.03697 | 0.11 | 0.12 | 0.11 | SNP       |
| chr6_31478960_G_A   | 31478960 | 1.61 | 1.02 | 2.51 | 0.03705 | 0.03 | 0.04 | 0.03 | SNP       |
| chr6_29692634_G_A   | 29692634 | 1.25 | 1.01 | 1.54 | 0.03713 | 0.20 | 0.21 | 0.20 | SNP       |
| chr6_32062487_G_A   | 32062487 | 1.25 | 1.01 | 1.55 | 0.03728 | 0.34 | 0.39 | 0.32 | SNP       |
| chr6_31240771_T_C   | 31240771 | 1.31 | 1.01 | 1.69 | 0.03741 | 0.10 | 0.11 | 0.10 | SNP       |
| chr6_31240932_C_A   | 31240932 | 1.31 | 1.01 | 1.69 | 0.03741 | 0.10 | 0.11 | 0.10 | SNP       |
| chr6_32042177_A_G   | 32042177 | 1.32 | 1.02 | 1.85 | 0.03752 | 0.02 | 0.02 | 0.01 | SNP       |
| chr6_32558183_G_T   | 32558183 | 1.23 | 1.01 | 1.49 | 0.03754 | 0.49 | 0.53 | 0.48 | SNP       |
| HLA_2H6E_A03_01     | 29910309 | 1.28 | 1.01 | 1.62 | 0.03766 | 0.17 | 0.18 | 0.17 | HLA (HLA) |
| chr6_31232154_G_C   | 31232154 | 1.48 | 1.01 | 1.14 | 0.03772 | 0.04 | 0.05 | 0.03 | SNP       |
| chr6_32168771_G_T   | 32168771 | 1.54 | 1.02 | 2.31 | 0.03775 | 0.13 | 0.14 | 0.13 | SNP       |
| chr6_32080191_G_C   | 32080191 | 1.74 | 1.03 | 2.95 | 0.03776 | 0.12 | 0.12 | 0.12 | SNP       |
| chr6_31380341_G_C   | 31380341 | 1.44 | 1.02 | 2.05 | 0.03794 | 0.34 | 0.34 | 0.34 | SNP       |
| chr6_31236679_T_C   | 31236679 | 0.79 | 0.63 | 0.99 | 0.03814 | 0.41 | 0.39 | 0.41 | SNP       |
| chr6_33633527_A_G   | 33633527 | 1.21 | 1.01 | 1.44 | 0.03821 | 0.30 | 0.34 | 0.29 | SNP       |
| chr6_32020238_G_A   | 32020238 | 1.82 | 1.02 | 3.12 | 0.03822 | 0.16 | 0.16 | 0.16 | SNP       |
| chr6_29977145_G_C   | 29977145 | 1.24 | 1.01 | 1.52 | 0.03837 | 0.25 | 0.26 | 0.25 | SNP       |
| chr6_30029651_G_C   | 30029651 | 1.24 | 1.01 | 1.53 | 0.03862 | 0.25 | 0.26 | 0.25 | SNP       |
| chr6_31237605_G_A   | 31237605 | 1.49 | 1.01 | 2.49 | 0.03871 | 0.21 | 0.24 | 0.20 | SNP       |
| chr6_29635928_C_T   | 29635928 | 1.25 | 1.01 | 1.54 | 0.03927 | 0.22 | 0.22 | 0.21 | SNP       |
| chr6_31333020_T_C   | 31333020 | 0.75 | 0.56 | 0.98 | 0.03951 | 0.14 | 0.10 | 0.14 | SNP       |
| chr6_32377116_G_C   | 32377116 | 1.27 | 1.01 | 1.59 | 0.03955 | 0.48 | 0.52 | 0.47 | SNP       |
| chr6_31237592_C_A   | 31237592 | 1.30 | 1.01 | 1.67 | 0.03976 | 0.34 | 0.35 | 0.34 | SNP       |
| chr6_32605578_G_A   | 32605578 | 1.25 | 1.01 | 1.53 | 0.03979 | 0.33 | 0.35 | 0.33 | SNP       |
| chr6_30461194_C_T   | 30461194 | 1.32 | 1.01 | 1.48 | 0.03984 | 0.29 | 0.32 | 0.28 | SNP       |
| chr6_30025503_G_A   | 30025503 | 1.22 | 1.01 | 1.47 | 0.04002 | 0.30 | 0.31 | 0.29 | SNP       |
| HLA_2H6E_D081_06_02 | 33627244 | 1.43 | 1.01 | 2.02 | 0.04035 | 0.17 | 0.17 | 0.17 | HLA (HLA) |
| chr6_29942324_T_C   | 29942324 | 0.83 | 0.69 | 0.99 | 0.04037 | 0.49 | 0.50 | 0.49 | SNP       |
| chr6_32555956_T_C   | 32555956 | 0.81 | 0.66 | 0.99 | 0.04049 | 0.46 | 0.40 | 0.44 | SNP       |
| chr6_32555965_G_T   | 32555965 | 1.39 | 1.01 | 1.91 | 0.04051 | 0.17 | 0.18 | 0.17 | SNP       |
| HLA_2H6E_D081_11_01 | 32546552 | 0.60 | 0.36 | 0.96 | 0.04052 | 0.04 | 0.02 | 0.04 | HLA (HLA) |
| chr6_29913074_G_C   | 29913074 | 1.25 | 1.01 | 1.56 | 0.04075 | 0.19 | 0.20 | 0.19 | SNP       |
| chr6_31325270_C_G   | 31325270 | 1.22 | 1.01 | 1.48 | 0.04087 | 0.48 | 0.51 | 0.48 | SNP       |
| chr6_32193945_G_C   | 32193945 | 0.80 | 0.64 | 0.99 | 0.04116 | 0.16 | 0.14 | 0.17 | SNP       |
| chr6_29890206_T_C   | 29890206 | 0.74 | 0.55 | 0.98 | 0.04118 | 0.10 | 0.08 | 0.10 | SNP       |
| chr6_32629403_C_T   | 32629403 | 1.30 | 1.01 | 1.67 | 0.04194 | 0.15 | 0.20 | 0.14 | SNP       |
| chr6_32184024_C_T   | 32184024 | 0.78 | 0.61 | 0.99 | 0.04205 | 0.14 | 0.13 | 0.14 | SNP       |
| chr6_32605078_A_G   | 32605078 | 1.30 | 1.01 | 1.66 | 0.04236 | 0.21 | 0.27 | 0.19 | SNP       |
| chr6_29858840_A_C   | 29858840 | 1.32 | 1.01 | 1.71 | 0.04243 | 0.15 | 0.16 | 0.14 | SNP       |
| chr6_31383848_G_A   | 31383848 | 0.73 | 0.53 | 0.98 | 0.04245 | 0.09 | 0.07 | 0.09 | SNP       |
| chr6_31237048_G_C   | 31237048 | 1.29 | 1.01 | 1.65 | 0.04261 | 0.34 | 0.35 | 0.34 | SNP       |
| chr6_31239937_C_T   | 31239937 | 0.79 | 0.63 | 0.99 | 0.04262 | 0.21 | 0.21 | 0.21 | SNP       |
| chr6_31237463_G_C   | 31237463 | 1.29 | 1.01 | 1.65 | 0.04268 | 0.34 | 0.36 | 0.34 | SNP       |
| chr6_32796793_G_A   | 32796793 | 0.73 | 0.53 | 0.98 | 0.04278 | 0.08 | 0.07 | 0.09 | SNP       |
| chr6_29913078_G_A   | 29913078 | 1.25 | 1.01 | 1.55 | 0.04281 | 0.19 | 0.20 | 0.19 | SNP       |
| chr6_32014828_G_A   | 32014828 | 1.72 | 1.02 | 2.92 | 0.04302 | 0.12 | 0.13 | 0.12 | SNP       |
| chr6_31232055_G_A   | 31232055 | 0.83 | 0.69 | 0.99 | 0.04306 | 0.33 | 0.29 | 0.34 | SNP       |
| chr6_29691097_A_T   | 29691097 | 0.74 | 0.55 | 0.98 | 0.04308 | 0.10 | 0.08 | 0.10 | SNP       |
| chr6_31240614_C_T   | 31240614 | 0.53 | 0.27 | 0.94 | 0.04309 | 0.02 | 0.01 | 0.02 | SNP       |
| chr6_29979310_G_C   | 29979310 | 1.24 | 1.01 | 1.51 | 0.04313 | 0.25 | 0.26 | 0.25 | SNP       |
| chr6_29855063_C_G   | 29855063 | 1.22 | 1.01 | 1.47 | 0.04317 | 0.31 | 0.32 | 0.31 | SNP       |
| chr6_31236341_C_T   | 31236341 | 0.80 | 0.64 | 0.99 | 0.04325 | 0.21 | 0.21 | 0.21 | SNP       |
| chr6_32797876_G_A   | 32797876 | 0.83 | 0.68 | 0.99 | 0.04329 | 0.41 | 0.35 | 0.42 | SNP       |
| chr6_31237353_C_T   | 31237353 | 1.29 | 1.01 | 1.65 | 0.04342 | 0.34 | 0.36 | 0.34 | SNP       |
| chr6_32193564_C_T   | 32193564 | 0.81 | 0.65 | 0.99 | 0.04370 | 0.21 | 0.18 | 0.22 | SNP       |
| chr6_32612301_C_T   | 32612301 | 1.38 | 1.01 | 1.90 | 0.04422 | 0.18 | 0.18 | 0.17 | SNP       |
| chr6_29857890_C_T   | 29857890 | 1.21 | 1.00 | 1.46 | 0.04442 | 0.23 | 0.24 | 0.23 | SNP       |
| chr6_32798647_A_T   | 32798647 | 0.62 | 0.38 | 0.97 | 0.04458 | 0.04 | 0.03 | 0.04 | SNP       |
| chr6_29897018_G_A   | 29897018 | 1.26 | 1.00 | 1.58 | 0.04480 | 0.18 | 0.19 | 0.18 | SNP       |
| chr6_32021355_G_A   | 32021355 | 1.89 | 0.99 | 3.47 | 0.04491 | 0.01 | 0.02 | 0.01 | SNP       |
| chr6_31528130_C_T   | 31528130 | 1.37 | 1.00 | 1.85 | 0.04512 | 0.08 | 0.09 | 0.08 | SNP       |
| chr6_31244102_A_G   | 31244102 | 0.53 | 0.27 | 0.95 | 0.04545 | 0.02 | 0.01 | 0.03 | SNP       |
| chr6_32806576_C_T   | 32806576 | 1.22 | 1.00 | 1.49 | 0.04553 | 0.42 | 0.47 | 0.41 | SNP       |
| chr6_33547287_C_G   | 33547287 | 0.58 | 0.33 | 0.96 | 0.04561 | 0.03 |      |      |           |

**Supplementary Table 4.** Association analysis of MPO-ANCA+ AAV patients versus controls, adjusting for sex and genetic structure (principal components 1-4).

| Variant                | position | OR  | CI_lower | CI_upper | p        | MAF  | MAF_cases | MAF_controls | Type (SNP, HLA) |
|------------------------|----------|-----|----------|----------|----------|------|-----------|--------------|-----------------|
| xHLA_2field_DQB1_04_D4 | 32546552 | 4.5 | 3.1      | 6.4      | 4.51E-16 | 0.07 | 0.22      | 0.06         | HLA (HLA)       |
| chr6_32609479_C_A      | 32609479 | 3.8 | 2.7      | 5.5      | 4.17E-13 | 0.22 | 0.44      | 0.20         | SNP             |
| chr6_32635954_G_A      | 32635954 | 3.6 | 2.5      | 5.1      | 1.89E-12 | 0.16 | 0.35      | 0.14         | SNP             |
| chr6_32559648_G_T      | 32559648 | 3.9 | 2.7      | 5.7      | 2.12E-12 | 0.20 | 0.41      | 0.18         | SNP             |
| chr6_32605987_T_G      | 32605987 | 3.5 | 2.5      | 5.0      | 2.87E-12 | 0.23 | 0.44      | 0.21         | SNP             |
| chr6_32604585_A_T      | 32604585 | 3.8 | 2.6      | 5.5      | 4.75E-12 | 0.23 | 0.44      | 0.21         | SNP             |
| chr6_32603798_A_T      | 32603798 | 3.5 | 2.4      | 5.0      | 6.46E-12 | 0.22 | 0.43      | 0.20         | SNP             |
| chr6_32605696_G_T      | 32605696 | 3.5 | 2.5      | 5.1      | 6.80E-12 | 0.23 | 0.43      | 0.21         | SNP             |
| chr6_32605555_T_A      | 32605555 | 3.5 | 2.4      | 5.0      | 7.00E-12 | 0.23 | 0.43      | 0.21         | SNP             |
| chr6_32605609_G_A      | 32605609 | 3.5 | 2.4      | 4.9      | 8.77E-12 | 0.23 | 0.43      | 0.21         | SNP             |
| chr6_32629403_C_T      | 32629403 | 3.4 | 2.4      | 4.8      | 1.00E-11 | 0.16 | 0.35      | 0.14         | SNP             |
| chr6_32559191_A_G      | 32559191 | 3.5 | 2.4      | 5.0      | 1.22E-11 | 0.21 | 0.42      | 0.19         | SNP             |
| chr6_32629259_T_C      | 32629259 | 3.4 | 2.4      | 4.9      | 1.35E-11 | 0.16 | 0.34      | 0.14         | SNP             |
| chr6_32608478_T_C      | 32608478 | 3.4 | 2.4      | 4.9      | 1.71E-11 | 0.22 | 0.43      | 0.20         | SNP             |
| chr6_32607126_A_G      | 32607126 | 3.3 | 2.3      | 4.7      | 3.07E-11 | 0.23 | 0.43      | 0.21         | SNP             |
| chr6_32605078_A_G      | 32605078 | 3.4 | 2.4      | 4.9      | 3.64E-11 | 0.21 | 0.42      | 0.19         | SNP             |
| chr6_32605178_T_C      | 32605178 | 3.3 | 1.8      | 4.7      | 4.21E-11 | 0.23 | 0.43      | 0.21         | SNP             |
| xHLA_2field_DQB1_03_02 | 32627244 | 4.4 | 2.3      | 4.8      | 4.82E-11 | 0.16 | 0.36      | 0.14         | HLA (HLA)       |
| chr6_32559213_A_T      | 32559213 | 3.5 | 2.4      | 5.0      | 4.85E-11 | 0.21 | 0.40      | 0.19         | SNP             |
| chr6_32628571_C_T      | 32628571 | 2.9 | 2.1      | 4.0      | 5.78E-11 | 0.23 | 0.42      | 0.21         | SNP             |
| chr6_32628913_G_T      | 32628913 | 3.5 | 2.4      | 5.1      | 5.93E-11 | 0.18 | 0.37      | 0.16         | SNP             |
| chr6_32605132_T_C      | 32605132 | 3.1 | 2.2      | 4.5      | 6.47E-11 | 0.27 | 0.48      | 0.25         | SNP             |
| chr6_32559702_A_G      | 32559702 | 3.6 | 2.5      | 5.4      | 8.45E-11 | 0.21 | 0.42      | 0.19         | SNP             |
| chr6_32610401_G_A      | 32610401 | 3.4 | 2.3      | 4.9      | 8.76E-11 | 0.22 | 0.41      | 0.20         | SNP             |
| chr6_32608286_T_C      | 32608286 | 3.6 | 2.4      | 5.3      | 1.07E-10 | 0.22 | 0.43      | 0.19         | SNP             |
| chr6_32628148_C_T      | 32628148 | 3.4 | 2.3      | 5.0      | 1.23E-10 | 0.16 | 0.34      | 0.14         | SNP             |
| chr6_32611467_A_C      | 32611467 | 3.4 | 2.3      | 4.9      | 1.60E-10 | 0.19 | 0.39      | 0.17         | SNP             |
| chr6_32628605_T_C      | 32628605 | 2.0 | 1.6      | 3.0      | 2.44E-10 | 0.23 | 0.42      | 0.22         | SNP             |
| chr6_32559710_C_T      | 32559710 | 3.4 | 2.4      | 5.1      | 2.54E-10 | 0.21 | 0.41      | 0.19         | SNP             |
| chr6_32627480_G_A      | 32627480 | 2.9 | 2.1      | 4.1      | 5.58E-10 | 0.39 | 0.57      | 0.37         | SNP             |
| chr6_32629500_C_A      | 32629500 | 2.7 | 2.0      | 3.7      | 6.47E-10 | 0.20 | 0.38      | 0.18         | SNP             |
| chr6_32628617_A_G      | 32628617 | 2.6 | 1.9      | 3.6      | 6.96E-10 | 0.24 | 0.42      | 0.22         | SNP             |
| chr6_32634556_G_A      | 32634556 | 2.7 | 2.0      | 3.7      | 7.04E-10 | 0.25 | 0.44      | 0.23         | SNP             |
| chr6_32628506_C_A      | 32628506 | 2.7 | 2.0      | 3.7      | 7.90E-10 | 0.23 | 0.41      | 0.21         | SNP             |
| chr6_32551665_A_G      | 32551665 | 3.1 | 2.1      | 4.4      | 9.66E-10 | 0.20 | 0.39      | 0.18         | SNP             |
| chr6_32633971_A_G      | 32633971 | 2.6 | 1.9      | 3.6      | 1.17E-09 | 0.20 | 0.38      | 0.18         | SNP             |
| chr6_32607031_G_T      | 32607031 | 2.8 | 2.0      | 3.9      | 1.47E-09 | 0.32 | 0.52      | 0.30         | SNP             |
| chr6_32627818_C_A      | 32627818 | 2.7 | 1.9      | 3.7      | 1.87E-09 | 0.21 | 0.39      | 0.19         | SNP             |
| chr6_32628283_G_A      | 32628283 | 2.8 | 2.0      | 3.9      | 1.90E-09 | 0.23 | 0.42      | 0.21         | SNP             |
| chr6_32604931_C_A      | 32604931 | 2.6 | 1.9      | 3.6      | 2.36E-09 | 0.30 | 0.51      | 0.28         | SNP             |
| chr6_32629328_G_A      | 32629328 | 2.6 | 1.9      | 3.6      | 2.39E-09 | 0.23 | 0.41      | 0.22         | SNP             |
| chr6_32551700_T_G      | 32551700 | 3.3 | 2.2      | 4.9      | 2.59E-09 | 0.16 | 0.36      | 0.14         | SNP             |
| chr6_32635974_A_G      | 32635974 | 2.5 | 1.9      | 3.4      | 2.61E-09 | 0.24 | 0.43      | 0.22         | SNP             |
| chr6_32628633_T_C      | 32628633 | 2.5 | 1.9      | 3.4      | 2.91E-09 | 0.24 | 0.42      | 0.22         | SNP             |
| chr6_32629639_T_C      | 32629639 | 2.5 | 1.8      | 3.4      | 2.96E-09 | 0.24 | 0.43      | 0.22         | SNP             |
| chr6_32635293_C_G      | 32635293 | 2.5 | 1.9      | 3.5      | 3.25E-09 | 0.24 | 0.42      | 0.22         | SNP             |
| chr6_32629269_C_T      | 32629269 | 2.6 | 1.9      | 3.5      | 3.33E-09 | 0.23 | 0.41      | 0.22         | SNP             |
| chr6_32634007_A_G      | 32634007 | 2.5 | 1.8      | 3.4      | 3.43E-09 | 0.24 | 0.43      | 0.22         | SNP             |
| chr6_32629330_C_T      | 32629330 | 2.6 | 1.9      | 3.5      | 3.72E-09 | 0.23 | 0.41      | 0.22         | SNP             |
| chr6_32634545_C_A      | 32634545 | 2.5 | 1.8      | 3.4      | 3.92E-09 | 0.24 | 0.43      | 0.22         | SNP             |
| chr6_32634425_C_T      | 32634425 | 2.5 | 1.8      | 3.4      | 3.98E-09 | 0.24 | 0.43      | 0.22         | SNP             |
| chr6_32629066_G_A      | 32629066 | 2.6 | 1.9      | 3.5      | 4.02E-09 | 0.23 | 0.41      | 0.22         | SNP             |
| chr6_32627777_G_C      | 32627777 | 2.5 | 1.8      | 3.4      | 4.26E-09 | 0.24 | 0.43      | 0.22         | SNP             |
| chr6_32635230_G_A      | 32635230 | 2.6 | 1.9      | 3.6      | 4.92E-09 | 0.23 | 0.41      | 0.22         | SNP             |
| chr6_32634646_T_C      | 32634646 | 2.6 | 1.9      | 3.5      | 5.06E-09 | 0.24 | 0.43      | 0.22         | SNP             |
| chr6_32628760_C_A      | 32628760 | 2.5 | 1.9      | 3.4      | 5.20E-09 | 0.24 | 0.42      | 0.22         | SNP             |
| chr6_32628916_G_A      | 32628916 | 2.5 | 1.8      | 3.4      | 5.39E-09 | 0.24 | 0.42      | 0.22         | SNP             |
| chr6_32606616_A_T      | 32606616 | 2.9 | 2.0      | 4.2      | 5.83E-09 | 0.28 | 0.45      | 0.26         | SNP             |
| chr6_32633172_C_T      | 32633172 | 2.4 | 1.8      | 3.3      | 5.95E-09 | 0.24 | 0.43      | 0.23         | SNP             |
| chr6_32633636_G_A      | 32633636 | 2.4 | 1.8      | 3.3      | 6.36E-09 | 0.24 | 0.43      | 0.23         | SNP             |
| chr6_32634967_T_A      | 32634967 | 2.4 | 1.8      | 3.3      | 7.12E-09 | 0.24 | 0.43      | 0.23         | SNP             |
| chr6_32627494_T_C      | 32627494 | 2.5 | 1.8      | 3.4      | 7.35E-09 | 0.25 | 0.44      | 0.23         | SNP             |
| chr6_32629399_G_A      | 32629399 | 2.5 | 1.8      | 3.4      | 7.39E-09 | 0.24 | 0.43      | 0.23         | SNP             |
| chr6_32628765_C_T      | 32628765 | 2.4 | 1.8      | 3.2      | 7.43E-09 | 0.40 | 0.57      | 0.38         | SNP             |
| chr6_32628030_G_A      | 32628030 | 2.4 | 1.8      | 3.2      | 7.90E-09 | 0.43 | 0.60      | 0.41         | SNP             |
| chr6_32629549_G_A      | 32629549 | 2.4 | 1.8      | 3.3      | 8.24E-09 | 0.24 | 0.43      | 0.23         | SNP             |
| chr6_32610008_C_T      | 32610008 | 2.5 | 1.9      | 3.5      | 8.56E-09 | 0.30 | 0.49      | 0.28         | SNP             |
| chr6_32636443_A_C      | 32636443 | 2.4 | 1.8      | 3.3      | 8.90E-09 | 0.24 | 0.42      | 0.22         | SNP             |
| chr6_32633899_T_C      | 32633899 | 2.4 | 1.8      | 3.3      | 9.13E-09 | 0.25 | 0.43      | 0.23         | SNP             |
| chr6_32636521_G_A      | 32636521 | 2.6 | 1.9      | 3.7      | 9.48E-09 | 0.18 | 0.35      | 0.16         | SNP             |
| chr6_32633781_C_T      | 32633781 | 2.4 | 1.8      | 3.3      | 9.54E-09 | 0.24 | 0.43      | 0.23         | SNP             |
| chr6_32629531_A_G      | 32629531 | 2.4 | 1.8      | 3.3      | 9.67E-09 | 0.24 | 0.43      | 0.23         | SNP             |
| chr6_32634057_C_T      | 32634057 | 2.4 | 1.8      | 3.3      | 9.77E-09 | 0.24 | 0.42      | 0.22         | SNP             |
| chr6_32636351_T_C      | 32636351 | 2.4 | 1.8      | 3.3      | 1.04E-08 | 0.24 | 0.42      | 0.22         | SNP             |
| chr6_32621591_C_T      | 32621591 | 2.6 | 1.9      | 3.5      | 1.08E-08 | 0.32 | 0.50      | 0.30         | SNP             |
| chr6_32635248_A_T      | 32635248 | 2.5 | 1.8      | 3.5      | 1.10E-08 | 0.23 | 0.40      | 0.21         | SNP             |
| chr6_32559708_G_A      | 32559708 | 2.7 | 1.9      | 3.8      | 1.12E-08 | 0.27 | 0.47      | 0.25         | SNP             |
| chr6_32628787_C_T      | 32628787 | 2.5 | 1.8      | 3.4      | 1.15E-08 | 0.24 | 0.42      | 0.22         | SNP             |
| chr6_32629755_G_A      | 32629755 | 2.4 | 1.8      | 3.3      | 1.18E-08 | 0.24 | 0.42      | 0.22         | SNP             |
| chr6_32605724_A_G      | 32605724 | 2.5 | 1.8      | 3.5      | 1.18E-08 | 0.29 | 0.48      | 0.27         | SNP             |
| chr6_32628439_G_A      | 32628439 | 2.4 | 1.8      | 3.2      | 1.18E-08 | 0.40 | 0.57      | 0.39         | SNP             |
| chr6_32634355_G_A      | 32634355 | 2.4 | 1.8      | 3.3      | 1.19E-08 | 0.24 | 0.42      | 0.22         | SNP             |
| chr6_32629543_T_C      | 32629543 | 2.4 | 1.8      | 3.2      | 1.20E-08 | 0.24 | 0.43      | 0.23         | SNP             |
| chr6_32634506_C_T      | 32634506 | 2.4 | 1.8      | 3.2      | 1.22E-08 | 0.25 | 0.43      | 0.23         | SNP             |
| chr6_32634755_C_T      | 32634755 | 2.4 | 1.8      | 3.3      | 1.29E-08 | 0.24 | 0.43      | 0.23         | SNP             |
| chr6_32604394_T_C      | 32604394 | 2.5 | 1.8      | 3.5      | 1.38E-08 | 0.30 | 0.49      | 0.28         | SNP             |
| chr6_32607047_T_G      | 32607047 | 2.6 | 1.9      | 3.6      | 1.38E-08 | 0.32 | 0.51      | 0.30         | SNP             |
| chr6_32629530_C_T      | 32629530 | 2.4 | 1.8      | 3.2      | 1.40E-08 | 0.25 | 0.43      | 0.23         | SNP             |
| chr6_32629422_T_C      | 32629422 | 2.4 | 1.8      | 3.3      | 1.43E-08 | 0.24 | 0.42      | 0.22         | SNP             |
| chr6_32633266_T_G      | 32633266 | 2.5 | 1.8      | 3.4      | 1.57E-08 | 0.23 | 0.40      | 0.21         | SNP             |
| chr6_32609456_C_T      | 32609456 | 2.5 | 1.8      | 3.5      | 1.60E-08 | 0.30 | 0.49      | 0.28         | SNP             |
| chr6_32612326_C_T      | 32612326 | 2.5 | 1.8      | 3.5      | 1.63E-08 | 0.29 | 0.48      | 0.27         | SNP             |
| chr6_32604108_T_C      | 32604108 | 2.5 | 1.8      | 3.4      | 1.71E-08 | 0.30 | 0.49      | 0.28         | SNP             |
| chr6_32608537_A_C      | 32608537 | 2.5 | 1.8      | 3.4      | 1.72E-08 | 0.29 | 0.49      | 0.28         | SNP             |
| chr6_32627833_A_G      | 32627833 | 2.3 | 1.7      | 3.1      | 1.73E-08 | 0.42 | 0.58      | 0.40         | SNP             |
| chr6_32635033_T_G      | 32635033 | 2.4 | 1.8      | 3.2      | 2.01E-08 | 0.24 | 0.42      | 0.22         | SNP             |
| chr6_32634094_T_C      | 32634094 | 2.4 | 1.8      | 3.2      | 2.13E-08 | 0.24 | 0.42      | 0.22         | SNP             |
| chr6_32636138_A_G      | 32636138 | 2.4 | 1.8      | 3.2      | 2.28E-08 | 0.24 | 0.41      | 0.22         | SNP             |
| chr6_32633767_G_T      | 32633767 | 2.4 | 1.8      | 3.2      | 2.36E-08 | 0.24 | 0.42      | 0.22         | SNP             |
| chr6_32634593_C_G      | 32634593 | 2.4 | 1.8      | 3.2      | 2.39E-08 | 0.24 | 0.42      | 0.22         | SNP             |
| chr6_32634098_C_G      | 32634098 | 2.4 | 1.8      | 3.2      | 2.61E-08 | 0.24 | 0.42      | 0.23         | SNP             |
| chr6_32606732_G_A      | 32606732 | 2.4 | 1.8      | 3.4      | 2.77E-08 | 0.30 | 0.49      | 0.28         | SNP             |
| chr6_32559124_T_C      | 32559124 | 2.5 | 1.8      | 3.5      | 2.87E-08 | 0.28 | 0.47      | 0.26         | SNP             |
| chr6_32634137_A_C      | 32634137 | 2.4 | 1.7      | 3.2      | 2.92E-08 | 0.24 | 0.42      | 0.22         | SNP             |
| chr6_32634091_G_C      | 32634091 | 2.4 | 1.7      | 3.2      | 2.95E-08 | 0.24 | 0.42      | 0.22         | SNP             |
| chr6_32634090_C_T      | 32634090 | 2.4 | 1.7      | 3.2      | 3.00E-08 | 0.24 | 0.42      | 0.22         | SNP             |
| chr6_32628189_A_G      | 32628189 | 2.6 | 1.9      | 3.6      | 3.07E-08 | 0.21 | 0.38      | 0.19         | SNP             |
| chr6_32636217_G_A      | 32636217 | 2.4 | 1.8      | 3.2      | 3.12E-08 | 0.24 | 0.41      | 0.22         | SNP             |
| chr6_32635154_C_T      | 32635154 | 2.4 | 1.7      | 3.2      | 3.14E-08 | 0.24 | 0.41      | 0.22         | SNP             |
| chr6_32633959_T_C      | 32633959 | 2.3 | 1.7      | 3.2      | 3.24E-08 | 0.24 | 0.42      | 0.23         | SNP             |
| chr6_32606942_G_A      | 32606942 | 2.4 | 1.8      | 3.3      | 3.86E-08 | 0.30 | 0.49      | 0.28         | SNP             |
| chr6_32604151_C_T      | 32604151 | 2.5 | 1.8      | 3.4      | 4.01E-08 | 0.30 | 0.49      | 0.28         | SNP             |
| chr6_32636061_G_A      | 32636061 | 2   |          |          |          |      |           |              |                 |



|                   |          |     |     |     |          |      |      |      |     |
|-------------------|----------|-----|-----|-----|----------|------|------|------|-----|
| chr6_32520460_C_T | 32520460 | 2.4 | 1.7 | 3.3 | 1.17E-07 | 0.32 | 0.51 | 0.30 | SNP |
| chr6_32520953_G_C | 32520953 | 0.4 | 0.3 | 0.6 | 1.18E-07 | 0.42 | 0.49 | 0.32 | SNP |
| chr6_32520639_G_A | 32520639 | 2.4 | 1.7 | 3.3 | 1.21E-07 | 0.31 | 0.51 | 0.29 | SNP |
| chr6_32611650_G_A | 32611650 | 2.4 | 1.8 | 3.4 | 1.23E-07 | 0.28 | 0.46 | 0.27 | SNP |
| chr6_32607193_T_C | 32607193 | 2.5 | 1.8 | 3.4 | 1.25E-07 | 0.34 | 0.53 | 0.32 | SNP |
| chr6_32559875_A_G | 32559875 | 2.7 | 1.9 | 3.9 | 1.27E-07 | 0.20 | 0.36 | 0.18 | SNP |
| chr6_32612397_A_G | 32612397 | 2.5 | 1.8 | 3.5 | 1.29E-07 | 0.47 | 0.66 | 0.45 | SNP |
| chr6_32611243_C_T | 32611243 | 2.4 | 1.7 | 3.3 | 1.46E-07 | 0.28 | 0.46 | 0.27 | SNP |
| chr6_32609207_T_C | 32609207 | 0.4 | 0.3 | 0.6 | 1.47E-07 | 0.50 | 0.66 | 0.48 | SNP |
| chr6_32611723_G_A | 32611723 | 0.4 | 0.3 | 0.6 | 1.49E-07 | 0.47 | 0.61 | 0.49 | SNP |
| chr6_32608880_G_A | 32608880 | 2.4 | 1.7 | 3.4 | 1.65E-07 | 0.33 | 0.51 | 0.31 | SNP |
| chr6_32628195_A_G | 32628195 | 3.5 | 2.2 | 5.6 | 1.66E-07 | 0.04 | 0.11 | 0.03 | SNP |
| chr6_32612241_A_T | 32612241 | 2.4 | 1.7 | 3.3 | 1.67E-07 | 0.29 | 0.47 | 0.27 | SNP |
| chr6_32636221_T_C | 32636221 | 0.4 | 0.3 | 0.6 | 1.68E-07 | 0.45 | 0.30 | 0.47 | SNP |
| chr6_32376517_C_T | 32376517 | 2.6 | 1.8 | 3.7 | 1.89E-07 | 0.09 | 0.18 | 0.08 | SNP |
| chr6_32609453_C_T | 32609453 | 2.4 | 1.7 | 3.3 | 1.92E-07 | 0.33 | 0.52 | 0.32 | SNP |
| chr6_32528967_T_C | 32528967 | 0.4 | 0.3 | 0.6 | 1.92E-07 | 0.49 | 0.33 | 0.51 | SNP |
| chr6_32604538_G_A | 32604538 | 2.5 | 1.8 | 3.5 | 2.04E-07 | 0.33 | 0.50 | 0.31 | SNP |
| chr6_32608856_T_C | 32608856 | 2.4 | 1.7 | 3.3 | 2.22E-07 | 0.28 | 0.46 | 0.27 | SNP |
| chr6_32605274_C_T | 32605274 | 0.4 | 0.3 | 0.6 | 2.55E-07 | 0.45 | 0.29 | 0.47 | SNP |
| chr6_32611725_G_A | 32611725 | 0.4 | 0.3 | 0.6 | 2.80E-07 | 0.47 | 0.31 | 0.49 | SNP |
| chr6_32611234_T_C | 32611234 | 2.3 | 1.7 | 3.2 | 2.87E-07 | 0.29 | 0.46 | 0.27 | SNP |
| chr6_32605759_A_T | 32605759 | 0.4 | 0.3 | 0.6 | 3.10E-07 | 0.46 | 0.30 | 0.47 | SNP |
| chr6_32610968_A_G | 32610968 | 2.4 | 1.7 | 3.3 | 3.12E-07 | 0.27 | 0.45 | 0.25 | SNP |
| chr6_32604000_T_G | 32604000 | 0.4 | 0.3 | 0.6 | 3.20E-07 | 0.46 | 0.30 | 0.47 | SNP |
| chr6_32635949_G_A | 32635949 | 2.1 | 1.6 | 2.9 | 3.23E-07 | 0.29 | 0.46 | 0.27 | SNP |
| chr6_32521596_T_G | 32521596 | 2.4 | 1.7 | 3.4 | 3.91E-07 | 0.36 | 0.54 | 0.34 | SNP |
| chr6_32603968_G_A | 32603968 | 0.4 | 0.3 | 0.6 | 3.95E-07 | 0.45 | 0.30 | 0.47 | SNP |
| chr6_32604564_C_T | 32604564 | 2.4 | 1.7 | 3.3 | 4.02E-07 | 0.33 | 0.51 | 0.31 | SNP |
| chr6_32611760_G_T | 32611760 | 2.3 | 1.7 | 3.3 | 4.09E-07 | 0.29 | 0.47 | 0.27 | SNP |
| chr6_32609126_C_T | 32609126 | 0.4 | 0.3 | 0.6 | 4.28E-07 | 0.46 | 0.31 | 0.48 | SNP |
| chr6_32611260_A_G | 32611260 | 2.3 | 1.7 | 3.2 | 4.38E-07 | 0.29 | 0.46 | 0.27 | SNP |
| chr6_32606217_G_A | 32606217 | 2.3 | 1.7 | 3.1 | 4.43E-07 | 0.31 | 0.48 | 0.28 | SNP |
| chr6_32634838_C_A | 32634838 | 0.4 | 0.3 | 0.6 | 4.56E-07 | 0.45 | 0.30 | 0.47 | SNP |
| chr6_32612041_A_G | 32612041 | 2.3 | 1.7 | 3.2 | 4.70E-07 | 0.29 | 0.47 | 0.27 | SNP |
| chr6_32629802_G_A | 32629802 | 0.4 | 0.3 | 0.6 | 4.78E-07 | 0.45 | 0.30 | 0.47 | SNP |
| chr6_32636280_T_C | 32636280 | 2.3 | 1.7 | 3.1 | 4.88E-07 | 0.23 | 0.39 | 0.22 | SNP |
| chr6_32607174_C_T | 32607174 | 2.3 | 1.7 | 3.2 | 4.96E-07 | 0.35 | 0.52 | 0.33 | SNP |
| chr6_32607008_T_G | 32607008 | 0.4 | 0.3 | 0.6 | 5.06E-07 | 0.45 | 0.30 | 0.47 | SNP |
| chr6_32501301_G_C | 32501301 | 0.4 | 0.3 | 0.6 | 5.07E-07 | 0.39 | 0.23 | 0.40 | SNP |
| chr6_32520774_C_T | 32520774 | 2.3 | 1.7 | 3.2 | 5.17E-07 | 0.30 | 0.49 | 0.29 | SNP |
| chr6_32605754_A_T | 32605754 | 0.4 | 0.3 | 0.6 | 5.24E-07 | 0.46 | 0.30 | 0.47 | SNP |
| chr6_32612050_A_G | 32612050 | 0.4 | 0.3 | 0.6 | 5.31E-07 | 0.47 | 0.32 | 0.49 | SNP |
| chr6_32501296_G_A | 32501296 | 0.4 | 0.3 | 0.6 | 5.36E-07 | 0.39 | 0.23 | 0.40 | SNP |
| chr6_32604124_G_C | 32604124 | 0.4 | 0.3 | 0.6 | 5.37E-07 | 0.50 | 0.66 | 0.48 | SNP |
| chr6_32608417_G_A | 32608417 | 2.3 | 1.7 | 3.2 | 5.46E-07 | 0.29 | 0.47 | 0.27 | SNP |
| chr6_32610994_C_A | 32610994 | 2.3 | 1.7 | 3.2 | 5.54E-07 | 0.27 | 0.44 | 0.25 | SNP |
| chr6_32634834_T_C | 32634834 | 0.4 | 0.3 | 0.6 | 5.57E-07 | 0.45 | 0.30 | 0.47 | SNP |
| chr6_32608809_T_C | 32608809 | 2.3 | 1.7 | 3.2 | 5.66E-07 | 0.27 | 0.44 | 0.25 | SNP |
| chr6_32610059_G_T | 32610059 | 0.4 | 0.3 | 0.6 | 5.92E-07 | 0.45 | 0.30 | 0.47 | SNP |
| chr6_32601459_C_T | 32601459 | 0.4 | 0.3 | 0.6 | 5.99E-07 | 0.39 | 0.24 | 0.41 | SNP |
| chr6_32610997_T_G | 32610997 | 2.3 | 1.7 | 3.2 | 6.00E-07 | 0.27 | 0.44 | 0.25 | SNP |
| chr6_32559709_C_T | 32559709 | 0.4 | 0.3 | 0.6 | 6.04E-07 | 0.44 | 0.28 | 0.46 | SNP |
| chr6_32612166_C_T | 32612166 | 2.3 | 1.7 | 3.2 | 6.08E-07 | 0.29 | 0.47 | 0.27 | SNP |
| chr6_32604372_A_G | 32604372 | 0.4 | 0.3 | 0.6 | 6.17E-07 | 0.46 | 0.31 | 0.48 | SNP |
| chr6_32604152_A_G | 32604152 | 2.2 | 1.6 | 3.1 | 6.67E-07 | 0.46 | 0.62 | 0.44 | SNP |
| chr6_32612008_T_C | 32612008 | 2.3 | 1.7 | 3.2 | 6.74E-07 | 0.29 | 0.46 | 0.27 | SNP |
| chr6_32609105_A_G | 32609105 | 0.4 | 0.3 | 0.6 | 6.78E-07 | 0.46 | 0.31 | 0.48 | SNP |
| chr6_32612161_C_A | 32612161 | 2.3 | 1.7 | 3.2 | 6.89E-07 | 0.29 | 0.47 | 0.27 | SNP |
| chr6_32609200_T_C | 32609200 | 0.4 | 0.3 | 0.6 | 6.99E-07 | 0.45 | 0.30 | 0.47 | SNP |
| chr6_32612111_G_A | 32612111 | 2.3 | 1.7 | 3.2 | 7.02E-07 | 0.29 | 0.46 | 0.27 | SNP |
| chr6_32559714_G_A | 32559714 | 0.4 | 0.3 | 0.6 | 7.19E-07 | 0.45 | 0.29 | 0.47 | SNP |
| chr6_32603412_T_C | 32603412 | 2.1 | 1.6 | 2.9 | 7.21E-07 | 0.48 | 0.66 | 0.46 | SNP |
| chr6_32605943_A_G | 32605943 | 0.4 | 0.3 | 0.6 | 7.95E-07 | 0.45 | 0.30 | 0.47 | SNP |
| chr6_32612104_C_T | 32612104 | 2.3 | 1.6 | 3.2 | 7.54E-07 | 0.29 | 0.46 | 0.27 | SNP |
| chr6_32636434_G_A | 32636434 | 0.4 | 0.3 | 0.6 | 7.71E-07 | 0.46 | 0.30 | 0.47 | SNP |
| chr6_32627714_G_C | 32627714 | 0.4 | 0.3 | 0.6 | 8.87E-07 | 0.45 | 0.30 | 0.47 | SNP |
| chr6_32606176_A_G | 32606176 | 0.4 | 0.3 | 0.6 | 8.14E-07 | 0.45 | 0.30 | 0.47 | SNP |
| chr6_32611964_C_T | 32611964 | 2.3 | 1.7 | 3.3 | 8.56E-07 | 0.28 | 0.45 | 0.27 | SNP |
| chr6_32605705_G_A | 32605705 | 0.4 | 0.3 | 0.6 | 8.94E-07 | 0.46 | 0.31 | 0.47 | SNP |
| chr6_32605708_A_G | 32605708 | 0.4 | 0.3 | 0.6 | 9.08E-07 | 0.46 | 0.31 | 0.47 | SNP |
| chr6_32602886_T_C | 32602886 | 0.4 | 0.3 | 0.6 | 9.88E-07 | 0.49 | 0.65 | 0.47 | SNP |
| chr6_32603487_C_T | 32603487 | 0.4 | 0.3 | 0.6 | 1.02E-06 | 0.45 | 0.30 | 0.47 | SNP |
| chr6_32636280_G_T | 32636280 | 2.2 | 1.6 | 3.1 | 1.04E-06 | 0.23 | 0.39 | 0.22 | SNP |
| chr6_32644008_C_T | 32644008 | 2.2 | 1.6 | 3.1 | 1.05E-06 | 0.21 | 0.48 | 0.29 | SNP |
| chr6_32629314_A_G | 32629314 | 0.4 | 0.3 | 0.6 | 1.13E-06 | 0.47 | 0.32 | 0.49 | SNP |
| chr6_32603098_T_C | 32603098 | 2.1 | 1.6 | 2.8 | 1.13E-06 | 0.48 | 0.66 | 0.46 | SNP |
| chr6_32601311_C_T | 32601311 | 0.4 | 0.3 | 0.6 | 1.14E-06 | 0.38 | 0.23 | 0.40 | SNP |
| chr6_32617600_T_G | 32617600 | 0.4 | 0.3 | 0.6 | 1.18E-06 | 0.45 | 0.30 | 0.47 | SNP |
| chr6_32606085_T_A | 32606085 | 0.4 | 0.3 | 0.6 | 1.19E-06 | 0.45 | 0.30 | 0.47 | SNP |
| chr6_32633617_A_G | 32633617 | 0.4 | 0.3 | 0.6 | 1.19E-06 | 0.44 | 0.30 | 0.46 | SNP |
| chr6_32550819_C_A | 32550819 | 2.2 | 1.6 | 3.1 | 1.20E-06 | 0.29 | 0.47 | 0.27 | SNP |
| chr6_32610860_G_T | 32610860 | 2.2 | 1.6 | 3.1 | 1.21E-06 | 0.29 | 0.46 | 0.27 | SNP |
| chr6_32627635_G_T | 32627635 | 0.4 | 0.3 | 0.6 | 1.28E-06 | 0.45 | 0.30 | 0.46 | SNP |
| chr6_32627489_A_G | 32627489 | 0.4 | 0.3 | 0.6 | 1.32E-06 | 0.43 | 0.28 | 0.45 | SNP |
| chr6_32627535_T_G | 32627535 | 0.4 | 0.3 | 0.6 | 1.37E-06 | 0.46 | 0.30 | 0.47 | SNP |
| chr6_32609514_C_T | 32609514 | 0.4 | 0.3 | 0.6 | 1.46E-06 | 0.46 | 0.31 | 0.47 | SNP |
| chr6_32627646_G_A | 32627646 | 0.4 | 0.3 | 0.6 | 1.51E-06 | 0.45 | 0.30 | 0.47 | SNP |
| chr6_32520665_A_C | 32520665 | 0.4 | 0.3 | 0.6 | 1.52E-06 | 0.37 | 0.23 | 0.39 | SNP |
| chr6_32520595_G_A | 32520595 | 0.4 | 0.3 | 0.6 | 1.56E-06 | 0.38 | 0.23 | 0.39 | SNP |
| chr6_32609112_C_A | 32609112 | 0.4 | 0.3 | 0.6 | 1.74E-06 | 0.46 | 0.30 | 0.48 | SNP |
| chr6_32611229_T_G | 32611229 | 0.4 | 0.3 | 0.6 | 1.80E-06 | 0.46 | 0.31 | 0.48 | SNP |
| chr6_32611034_T_A | 32611034 | 2.2 | 1.6 | 3.0 | 1.86E-06 | 0.27 | 0.44 | 0.26 | SNP |
| chr6_32635226_G_T | 32635226 | 0.4 | 0.3 | 0.6 | 1.88E-06 | 0.46 | 0.32 | 0.48 | SNP |
| chr6_32629347_T_C | 32629347 | 2.2 | 1.6 | 3.1 | 2.09E-06 | 0.37 | 0.50 | 0.35 | SNP |
| chr6_32604642_A_G | 32604642 | 2.3 | 1.6 | 3.2 | 2.09E-06 | 0.28 | 0.45 | 0.26 | SNP |
| chr6_32611769_G_C | 32611769 | 2.3 | 1.6 | 3.2 | 2.16E-06 | 0.31 | 0.47 | 0.29 | SNP |
| chr6_32627485_C_T | 32627485 | 0.4 | 0.3 | 0.6 | 2.16E-06 | 0.43 | 0.28 | 0.45 | SNP |
| chr6_32520337_A_G | 32520337 | 2.4 | 1.7 | 3.4 | 2.17E-06 | 0.32 | 0.51 | 0.30 | SNP |
| chr6_32628784_A_C | 32628784 | 0.4 | 0.3 | 0.6 | 2.26E-06 | 0.48 | 0.32 | 0.49 | SNP |
| chr6_32612003_C_T | 32612003 | 0.4 | 0.3 | 0.6 | 2.27E-06 | 0.47 | 0.33 | 0.49 | SNP |
| chr6_32611261_C_T | 32611261 | 2.2 | 1.6 | 3.0 | 2.44E-06 | 0.29 | 0.45 | 0.27 | SNP |
| chr6_32550947_A_G | 32550947 | 2.2 | 1.6 | 3.1 | 2.54E-06 | 0.22 | 0.42 | 0.20 | SNP |
| chr6_32611958_C_G | 32611958 | 2.3 | 1.6 | 3.2 | 2.70E-06 | 0.28 | 0.44 | 0.27 | SNP |
| chr6_32634103_C_T | 32634103 | 0.4 | 0.3 | 0.6 | 2.71E-06 | 0.45 | 0.30 | 0.47 | SNP |
| chr6_32639467_G_A | 32639467 | 2.2 | 1.6 | 3.0 | 2.87E-06 | 0.37 | 0.54 | 0.35 | SNP |
| chr6_32636385_A_T | 32636385 | 2.0 | 1.5 | 2.6 | 3.02E-06 | 0.38 | 0.51 | 0.36 | SNP |
| chr6_32551568_C_G | 32551568 | 0.4 | 0.3 | 0.6 | 3.05E-06 | 0.38 | 0.24 | 0.40 | SNP |
| chr6_32610934_A_G | 32610934 | 2.3 | 1.6 | 3.2 | 3.15E-06 | 0.31 | 0.47 | 0.29 | SNP |
| chr6_32606701_A_G | 32606701 | 0.3 | 0.2 | 0.5 | 3.24E-06 | 0.17 | 0.07 | 0.18 | SNP |
| chr6_32627517_G_T | 32627517 | 0.4 | 0.3 | 0.6 | 3.33E-06 | 0.45 | 0.31 | 0.47 | SNP |
| chr6_32628776_A_C | 32628776 | 0.4 | 0.3 | 0.6 | 3.40E-06 | 0.48 | 0.33 | 0.49 | SNP |
| chr6_32611931_T_A | 32611931 | 0.4 | 0.3 | 0.6 | 3.44E-06 | 0.47 | 0.32 | 0.48 | SNP |
| chr6_32611873_C_T | 32611873 | 0.4 | 0.3 | 0.6 | 3.48E-06 | 0.47 | 0.32 | 0.48 | SNP |

|                    |          |     |     |     |          |      |      |      |           |
|--------------------|----------|-----|-----|-----|----------|------|------|------|-----------|
| chr6_31473746_G_A  | 31473746 | 4.6 | 2.3 | 9.0 | 9.76E-06 | 0.12 | 0.14 | 0.12 | SNP       |
| chr6_32629582_T_C  | 32629582 | 0.3 | 0.3 | 0.6 | 1.02E-01 | 0.31 | 0.21 | 0.32 | SNP       |
| chr6_32550931_C_A  | 32550931 | 2.1 | 1.5 | 3.0 | 1.09E-05 | 0.23 | 0.42 | 0.21 | SNP       |
| chr6_32521951_A_C  | 32521951 | 0.5 | 0.3 | 0.6 | 1.10E-05 | 0.37 | 0.23 | 0.39 | SNP       |
| chr6_32633816_C_G  | 32633816 | 1.9 | 1.4 | 2.5 | 1.13E-05 | 0.38 | 0.50 | 0.36 | SNP       |
| chr6_31329416_G_C  | 31329416 | 4.1 | 2.2 | 7.6 | 1.14E-05 | 0.12 | 0.14 | 0.12 | SNP       |
| HLA_Hfield_C_D7_D1 | 31296526 | 2.7 | 1.7 | 4.2 | 1.20E-05 | 0.14 | 0.18 | 0.14 | HLA (HLA) |
| chr6_32629535_C_A  | 32629535 | 2.1 | 1.5 | 2.9 | 1.23E-05 | 0.37 | 0.53 | 0.35 | SNP       |
| chr6_32633865_T_C  | 32633865 | 0.4 | 0.3 | 0.6 | 1.24E-05 | 0.31 | 0.21 | 0.32 | SNP       |
| chr6_32629751_T_C  | 32629751 | 0.5 | 0.3 | 0.7 | 1.26E-05 | 0.47 | 0.33 | 0.49 | SNP       |
| chr6_31326703_T_C  | 31326703 | 4.4 | 2.2 | 8.5 | 1.37E-05 | 0.12 | 0.13 | 0.12 | SNP       |
| chr6_32629297_C_T  | 32629297 | 0.5 | 0.3 | 0.7 | 1.42E-05 | 0.45 | 0.30 | 0.46 | SNP       |
| chr6_32630706_C_T  | 32630706 | 0.4 | 0.3 | 0.6 | 1.49E-05 | 0.33 | 0.22 | 0.34 | SNP       |
| chr6_32796310_A_G  | 32796310 | 2.9 | 1.8 | 4.8 | 1.58E-05 | 0.03 | 0.09 | 0.03 | SNP       |
| chr6_32627561_C_T  | 32627561 | 0.4 | 0.3 | 0.6 | 1.59E-05 | 0.32 | 0.22 | 0.33 | SNP       |
| chr6_32629764_C_T  | 32629764 | 2.0 | 1.5 | 2.8 | 1.90E-05 | 0.37 | 0.54 | 0.36 | SNP       |
| chr6_32611427_T_A  | 32611427 | 2.1 | 1.5 | 3.0 | 1.93E-05 | 0.27 | 0.43 | 0.26 | SNP       |
| chr6_32628420_C_T  | 32628420 | 2.1 | 1.5 | 2.9 | 1.94E-05 | 0.36 | 0.52 | 0.34 | SNP       |
| chr6_32634010_A_G  | 32634010 | 0.4 | 0.3 | 0.6 | 1.94E-05 | 0.31 | 0.21 | 0.32 | SNP       |
| chr6_32629320_G_A  | 32629320 | 0.4 | 0.3 | 0.6 | 1.95E-05 | 0.33 | 0.22 | 0.34 | SNP       |
| chr6_31326074_A_T  | 31326074 | 4.3 | 2.2 | 8.4 | 2.03E-05 | 0.12 | 0.13 | 0.11 | SNP       |
| chr6_32629409_G_A  | 32629409 | 0.4 | 0.3 | 0.6 | 2.08E-05 | 0.32 | 0.21 | 0.33 | SNP       |
| chr6_32553418_T_G  | 32553418 | 0.5 | 0.3 | 0.7 | 2.22E-05 | 0.41 | 0.27 | 0.42 | SNP       |
| chr6_32629400_G_A  | 32629400 | 2.0 | 1.5 | 2.9 | 2.26E-05 | 0.37 | 0.53 | 0.35 | SNP       |
| chr6_31323506_C_T  | 31323506 | 3.9 | 2.1 | 7.4 | 2.38E-05 | 0.12 | 0.13 | 0.12 | SNP       |
| chr6_32633906_A_C  | 32633906 | 0.5 | 0.3 | 0.6 | 2.46E-05 | 0.33 | 0.23 | 0.34 | SNP       |
| HLA_Hfield_B_D8_D1 | 31321652 | 4.0 | 2.1 | 7.7 | 2.49E-05 | 0.12 | 0.14 | 0.11 | HLA (HLA) |
| chr6_32632777_C_T  | 32632777 | 0.4 | 0.3 | 0.6 | 2.53E-05 | 0.14 | 0.04 | 0.15 | SNP       |
| chr6_32611403_G_A  | 32611403 | 2.0 | 1.5 | 2.8 | 2.71E-05 | 0.27 | 0.44 | 0.25 | SNP       |
| chr6_32628845_G_A  | 32628845 | 2.0 | 1.5 | 2.8 | 2.72E-05 | 0.37 | 0.53 | 0.35 | SNP       |
| chr6_32611418_A_C  | 32611418 | 2.1 | 1.5 | 2.9 | 2.79E-05 | 0.27 | 0.43 | 0.26 | SNP       |
| chr6_31129310_C_T  | 31129310 | 3.9 | 2.0 | 7.3 | 3.62E-05 | 0.12 | 0.14 | 0.12 | SNP       |
| chr6_32636494_C_T  | 32636494 | 0.5 | 0.3 | 0.7 | 3.77E-05 | 0.43 | 0.29 | 0.44 | SNP       |
| chr6_31322790_T_A  | 31322790 | 3.8 | 2.0 | 7.0 | 3.87E-05 | 0.12 | 0.14 | 0.12 | SNP       |
| chr6_31558702_C_T  | 31558702 | 4.3 | 2.1 | 8.5 | 4.00E-05 | 0.12 | 0.13 | 0.12 | SNP       |
| chr6_32611510_C_G  | 32611510 | 0.5 | 0.3 | 0.7 | 4.05E-05 | 0.47 | 0.34 | 0.48 | SNP       |
| chr6_32634485_C_A  | 32634485 | 0.5 | 0.3 | 0.7 | 4.41E-05 | 0.32 | 0.22 | 0.33 | SNP       |
| chr6_32797488_T_C  | 32797488 | 1.8 | 1.4 | 2.5 | 4.51E-05 | 0.31 | 0.41 | 0.30 | SNP       |
| chr6_32605583_A_G  | 32605583 | 1.8 | 1.4 | 2.4 | 4.61E-05 | 0.39 | 0.53 | 0.37 | SNP       |
| chr6_31465047_C_T  | 31465047 | 4.1 | 2.1 | 8.1 | 4.69E-05 | 0.12 | 0.13 | 0.12 | SNP       |
| chr6_32627652_C_G  | 32627652 | 2.0 | 1.4 | 2.7 | 4.90E-05 | 0.37 | 0.53 | 0.36 | SNP       |
| chr6_32611504_C_A  | 32611504 | 0.5 | 0.4 | 0.7 | 5.40E-05 | 0.47 | 0.34 | 0.49 | SNP       |
| chr6_32636591_G_A  | 32636591 | 0.4 | 0.3 | 0.7 | 5.56E-05 | 0.46 | 0.30 | 0.47 | SNP       |
| chr6_31243895_T_C  | 31243895 | 1.9 | 1.4 | 2.5 | 5.82E-05 | 0.39 | 0.43 | 0.38 | SNP       |
| chr6_32628944_C_G  | 32628944 | 2.0 | 1.4 | 2.8 | 6.52E-05 | 0.35 | 0.51 | 0.34 | SNP       |
| chr6_31243830_G_A  | 31243830 | 1.9 | 1.4 | 2.5 | 6.81E-05 | 0.39 | 0.44 | 0.38 | SNP       |
| chr6_32603660_T_C  | 32603660 | 1.8 | 1.4 | 2.4 | 7.23E-05 | 0.39 | 0.53 | 0.38 | SNP       |
| chr6_32340070_C_T  | 32340070 | 1.8 | 1.4 | 2.5 | 7.68E-05 | 0.39 | 0.53 | 0.38 | SNP       |
| chr6_31708463_C_A  | 31708463 | 4.6 | 2.2 | 9.9 | 7.90E-05 | 0.12 | 0.13 | 0.12 | SNP       |
| chr6_32611472_G_A  | 32611472 | 0.5 | 0.4 | 0.7 | 8.27E-05 | 0.47 | 0.33 | 0.48 | SNP       |
| chr6_31514247_A_G  | 31514247 | 4.0 | 2.0 | 8.1 | 8.82E-05 | 0.12 | 0.13 | 0.12 | SNP       |
| chr6_31244021_A_G  | 31244021 | 2.2 | 1.5 | 3.3 | 9.23E-05 | 0.32 | 0.35 | 0.31 | SNP       |
| chr6_31240060_G_A  | 31240060 | 2.2 | 1.5 | 3.2 | 0.000104 | 0.33 | 0.36 | 0.32 | SNP       |
| chr6_31721033_G_A  | 31721033 | 4.5 | 2.1 | 9.7 | 0.000107 | 0.12 | 0.13 | 0.12 | SNP       |
| chr6_32627456_A_G  | 32627456 | 0.5 | 0.3 | 0.7 | 0.000108 | 0.36 | 0.25 | 0.37 | SNP       |
| chr6_31085356_C_T  | 31085356 | 3.3 | 1.8 | 6.1 | 0.000109 | 0.12 | 0.13 | 0.12 | SNP       |
| chr6_32629859_G_A  | 32629859 | 0.5 | 0.4 | 0.7 | 0.000109 | 0.48 | 0.36 | 0.50 | SNP       |
| chr6_31921486_A_G  | 31921486 | 3.8 | 1.9 | 7.3 | 0.000111 | 0.01 | 0.04 | 0.01 | SNP       |
| chr6_32609094_C_T  | 32609094 | 1.9 | 1.4 | 2.6 | 0.000114 | 0.25 | 0.50 | 0.34 | SNP       |
| chr6_31243884_G_A  | 31243884 | 1.9 | 1.4 | 2.6 | 0.000119 | 0.21 | 0.25 | 0.21 | SNP       |
| chr6_31430065_C_T  | 31430065 | 3.9 | 1.9 | 7.8 | 0.000142 | 0.12 | 0.13 | 0.11 | SNP       |
| chr6_31237048_G_A  | 31237048 | 2.0 | 1.4 | 2.8 | 0.000157 | 0.34 | 0.38 | 0.34 | SNP       |
| chr6_31473957_C_G  | 31473957 | 3.6 | 1.8 | 6.9 | 0.000160 | 0.12 | 0.13 | 0.12 | SNP       |
| chr6_32407068_G_A  | 32407068 | 3.0 | 1.7 | 5.1 | 0.000161 | 0.02 | 0.06 | 0.02 | SNP       |
| chr6_32405821_T_C  | 32405821 | 1.9 | 1.4 | 2.7 | 0.000187 | 0.24 | 0.39 | 0.23 | SNP       |
| chr6_31636742_A_G  | 31636742 | 4.1 | 1.9 | 8.0 | 0.000187 | 0.12 | 0.13 | 0.12 | SNP       |
| chr6_32184705_G_A  | 32184705 | 1.7 | 1.3 | 2.3 | 0.000188 | 0.33 | 0.39 | 0.33 | SNP       |
| chr6_32635713_C_T  | 32635713 | 0.5 | 0.4 | 0.7 | 0.000194 | 0.48 | 0.34 | 0.49 | SNP       |
| chr6_31238029_C_T  | 31238029 | 2.0 | 1.4 | 2.8 | 0.000194 | 0.36 | 0.39 | 0.35 | SNP       |
| chr6_31430010_G_A  | 31430010 | 3.7 | 1.8 | 7.3 | 0.000206 | 0.12 | 0.13 | 0.12 | SNP       |
| chr6_31237323_G_A  | 31237323 | 2.0 | 1.4 | 2.8 | 0.000211 | 0.35 | 0.38 | 0.34 | SNP       |
| chr6_31243979_A_T  | 31243979 | 2.1 | 1.4 | 3.2 | 0.000218 | 0.32 | 0.35 | 0.32 | SNP       |
| chr6_31705864_C_T  | 31705864 | 4.0 | 1.9 | 8.4 | 0.000227 | 0.12 | 0.13 | 0.12 | SNP       |
| chr6_31712196_G_A  | 31712196 | 4.0 | 1.9 | 8.4 | 0.000227 | 0.12 | 0.13 | 0.12 | SNP       |
| chr6_31725230_G_A  | 31725230 | 4.0 | 1.9 | 8.4 | 0.000227 | 0.12 | 0.13 | 0.12 | SNP       |
| chr6_31726794_C_T  | 31726794 | 4.0 | 1.9 | 8.4 | 0.000227 | 0.12 | 0.13 | 0.12 | SNP       |
| chr6_31727474_A_G  | 31727474 | 4.0 | 1.9 | 8.4 | 0.000227 | 0.12 | 0.13 | 0.12 | SNP       |
| chr6_31725285_A_G  | 31725285 | 4.0 | 1.9 | 8.3 | 0.000236 | 0.12 | 0.13 | 0.12 | SNP       |
| chr6_31765984_G_A  | 31765984 | 4.5 | 2.0 | 9.9 | 0.000243 | 0.12 | 0.12 | 0.12 | SNP       |
| chr6_31237233_G_A  | 31237233 | 2.0 | 1.4 | 2.8 | 0.000264 | 0.35 | 0.39 | 0.35 | SNP       |
| chr6_32606995_T_C  | 32606995 | 0.3 | 0.2 | 0.6 | 0.000270 | 0.11 | 0.04 | 0.12 | SNP       |
| chr6_31237333_A_T  | 31237333 | 2.0 | 1.4 | 2.8 | 0.000282 | 0.35 | 0.38 | 0.34 | SNP       |
| chr6_32190969_C_T  | 32190969 | 3.5 | 1.7 | 6.7 | 0.000308 | 0.01 | 0.04 | 0.01 | SNP       |
| chr6_31237449_C_T  | 31237449 | 2.0 | 1.4 | 3.0 | 0.000312 | 0.32 | 0.35 | 0.31 | SNP       |
| chr6_32376019_G_T  | 32376019 | 0.3 | 0.2 | 0.6 | 0.000312 | 0.11 | 0.04 | 0.11 | SNP       |
| chr6_32609341_T_C  | 32609341 | 0.4 | 0.3 | 0.6 | 0.000314 | 0.48 | 0.35 | 0.49 | SNP       |
| chr6_31237353_C_T  | 31237353 | 1.9 | 1.3 | 2.8 | 0.000317 | 0.34 | 0.37 | 0.34 | SNP       |
| chr6_32370684_G_A  | 32370684 | 1.8 | 1.3 | 2.5 | 0.000320 | 0.27 | 0.42 | 0.26 | SNP       |
| chr6_31241664_G_A  | 31241664 | 2.3 | 1.5 | 3.7 | 0.000321 | 0.14 | 0.16 | 0.14 | SNP       |
| chr6_31237061_T_C  | 31237061 | 1.9 | 1.3 | 2.7 | 0.000327 | 0.36 | 0.39 | 0.35 | SNP       |
| chr6_31243971_G_A  | 31243971 | 2.1 | 1.4 | 3.1 | 0.000327 | 0.32 | 0.35 | 0.32 | SNP       |
| chr6_32553662_A_G  | 32553662 | 0.6 | 0.4 | 0.8 | 0.000338 | 0.38 | 0.28 | 0.40 | SNP       |
| chr6_31237405_T_C  | 31237405 | 1.9 | 1.3 | 2.8 | 0.000348 | 0.34 | 0.37 | 0.34 | SNP       |
| chr6_31237230_G_A  | 31237230 | 1.9 | 1.3 | 2.8 | 0.000356 | 0.35 | 0.38 | 0.35 | SNP       |
| chr6_31239227_T_C  | 31239227 | 2.1 | 1.4 | 3.2 | 0.000356 | 0.37 | 0.42 | 0.37 | SNP       |
| chr6_32553317_C_T  | 32553317 | 0.3 | 0.2 | 0.6 | 0.000363 | 0.10 | 0.04 | 0.10 | SNP       |
| chr6_31237592_C_T  | 31237592 | 1.9 | 1.3 | 2.8 | 0.000363 | 0.34 | 0.37 | 0.34 | SNP       |
| chr6_31462135_G_A  | 31462135 | 4.1 | 1.9 | 9.0 | 0.000366 | 0.13 | 0.14 | 0.12 | SNP       |
| chr6_31237950_C_T  | 31237950 | 1.9 | 1.3 | 2.8 | 0.000368 | 0.36 | 0.40 | 0.36 | SNP       |
| chr6_32631039_G_A  | 32631039 | 0.5 | 0.3 | 0.7 | 0.000370 | 0.37 | 0.27 | 0.38 | SNP       |
| chr6_31705776_A_G  | 31705776 | 3.9 | 1.8 | 8.4 | 0.000374 | 0.30 | 0.12 | 0.12 | SNP       |
| chr6_31241092_G_C  | 31241092 | 1.7 | 1.3 | 2.4 | 0.000379 | 0.38 | 0.41 | 0.38 | SNP       |
| chr6_31239868_C_G  | 31239868 | 1.9 | 1.3 | 2.8 | 0.000422 | 0.35 | 0.39 | 0.35 | SNP       |
| chr6_31241311_G_A  | 31241311 | 2.3 | 1.4 | 3.6 | 0.000433 | 0.14 | 0.16 | 0.14 | SNP       |
| chr6_31611373_A_G  | 31611373 | 0.5 | 0.4 | 0.7 | 0.000442 | 0.49 | 0.36 | 0.51 | SNP       |
| chr6_32605508_G_T  | 32605508 | 1.8 | 1.3 | 2.4 | 0.000445 | 0.38 | 0.53 | 0.36 | SNP       |
| chr6_31238613_G_A  | 31238613 | 1.9 | 1.3 | 2.7 | 0.000476 | 0.35 | 0.37 | 0.34 | SNP       |
| chr6_31237162_G_C  | 31237162 | 1.9 | 1.3 | 2.7 | 0.000479 | 0.34 | 0.37 | 0.34 | SNP       |
| chr6_31237124_C_T  | 31237124 | 1.9 | 1.3 | 2.7 | 0.000487 | 0.34 | 0.37 | 0.34 | SNP       |
| chr6_31240041_T_C  | 31240041 | 1.8 | 1.3 | 2.5 | 0.000489 | 0.41 | 0.43 | 0.41 | SNP       |
| chr6_31246324_A_C  | 31246324 | 2.3 | 1.4 | 3.7 | 0.000490 | 0.14 | 0.16 | 0.14 | SNP       |
| chr6_32364356_G_A  | 32364356 | 1.8 | 1.3 | 2.5 | 0.000495 | 0.28 | 0.42 | 0.26 | SNP       |
| chr6_32376746_C_T  | 32376746 | 1.8 | 1.3 | 2.4 | 0.000500 | 0.28 | 0.42 | 0.26 | SNP       |
| chr6_32375352_A_C  | 32375352 | 1.8 | 1.3 | 2.4 | 0.000510 | 0.29 | 0.43 | 0.27 | SNP       |
|                    |          |     |     |     |          |      |      |      |           |

|                        |          |     |     |     |          |      |      |      |           |
|------------------------|----------|-----|-----|-----|----------|------|------|------|-----------|
| chr6_31325341_C_G      | 31325341 | 1.9 | 1.3 | 2.7 | 0.000915 | 0.32 | 0.35 | 0.32 | SNP       |
| chr6_31237424_G_A      | 31237424 | 1.1 | 1.2 | 2.3 | 0.000917 | 0.21 | 0.29 | 0.43 | SNP       |
| chr6_31243859_C_T      | 31243859 | 1.8 | 1.3 | 2.4 | 0.000932 | 0.21 | 0.25 | 0.21 | SNP       |
| chr6_32096001_C_A      | 32096001 | 3.7 | 1.7 | 7.8 | 0.000942 | 0.12 | 0.13 | 0.12 | SNP       |
| chr6_32089142_G_T      | 32089142 | 0.2 | 0.1 | 0.5 | 0.000946 | 0.09 | 0.02 | 0.09 | SNP       |
| chr6_31246523_G_A      | 31246523 | 1.8 | 1.3 | 2.6 | 0.000955 | 0.35 | 0.37 | 0.35 | SNP       |
| chr6_31324599_T_G      | 31324599 | 0.5 | 0.3 | 0.7 | 0.000959 | 0.14 | 0.11 | 0.14 | SNP       |
| chr6_32633467_A_G      | 32633467 | 0.3 | 0.1 | 0.6 | 0.000967 | 0.09 | 0.03 | 0.10 | SNP       |
| chr6_31726253_T_C      | 31726253 | 3.5 | 1.7 | 7.5 | 0.000981 | 0.12 | 0.12 | 0.12 | SNP       |
| chr6_32409656_G_A      | 32409656 | 1.7 | 1.2 | 2.3 | 0.000984 | 0.35 | 0.50 | 0.34 | SNP       |
| chr6_31325494_C_T      | 31325494 | 1.9 | 1.3 | 2.7 | 0.001013 | 0.32 | 0.35 | 0.32 | SNP       |
| chr6_32080383_C_T      | 32080383 | 0.3 | 0.1 | 0.6 | 0.001035 | 0.08 | 0.03 | 0.09 | SNP       |
| chr6_31374131_C_G      | 31374131 | 1.7 | 1.2 | 2.4 | 0.001047 | 0.28 | 0.42 | 0.26 | SNP       |
| chr6_29695180_G_A      | 29695180 | 1.6 | 1.2 | 2.2 | 0.001058 | 0.23 | 0.28 | 0.22 | SNP       |
| chr6_31325513_G_C      | 31325513 | 1.9 | 1.3 | 2.7 | 0.001066 | 0.32 | 0.35 | 0.32 | SNP       |
| chr6_31918860_G_A      | 31918860 | 3.4 | 1.6 | 6.9 | 0.001072 | 0.12 | 0.12 | 0.12 | SNP       |
| chr6_31237463_G_C      | 31237463 | 1.8 | 1.3 | 2.6 | 0.001089 | 0.34 | 0.37 | 0.34 | SNP       |
| chr6_32611152_G_A      | 32611152 | 1.7 | 1.2 | 2.3 | 0.001097 | 0.21 | 0.35 | 0.20 | SNP       |
| chr6_31237664_T_C      | 31237664 | 1.8 | 1.3 | 2.6 | 0.001104 | 0.35 | 0.37 | 0.35 | SNP       |
| chr6_31506854_T_C      | 31506854 | 1.9 | 1.3 | 2.7 | 0.001107 | 0.23 | 0.29 | 0.23 | SNP       |
| chr6_31378111_C_T      | 31378111 | 0.4 | 0.3 | 0.7 | 0.001111 | 0.09 | 0.07 | 0.09 | SNP       |
| chr6_32363844_C_T      | 32363844 | 1.7 | 1.2 | 2.4 | 0.001114 | 0.28 | 0.41 | 0.26 | SNP       |
| chr6_31325504_C_T      | 31325504 | 1.9 | 1.3 | 2.7 | 0.001118 | 0.32 | 0.35 | 0.32 | SNP       |
| chr6_31325380_T_C      | 31325380 | 1.9 | 1.3 | 2.7 | 0.001125 | 0.32 | 0.35 | 0.32 | SNP       |
| chr6_32552824_T_C      | 32552824 | 0.3 | 0.1 | 0.6 | 0.001126 | 0.08 | 0.03 | 0.08 | SNP       |
| chr6_32604213_A_C      | 32604213 | 0.6 | 0.4 | 0.8 | 0.001135 | 0.40 | 0.28 | 0.41 | SNP       |
| chr6_31236175_C_T      | 31236175 | 0.6 | 0.5 | 0.8 | 0.001174 | 0.43 | 0.41 | 0.44 | SNP       |
| chr6_32341473_T_C      | 32341473 | 1.7 | 1.2 | 2.3 | 0.001176 | 0.28 | 0.42 | 0.26 | SNP       |
| chr6_31924880_G_A      | 31924880 | 0.3 | 0.1 | 0.6 | 0.001185 | 0.03 | 0.03 | 0.09 | SNP       |
| chr6_32603825_C_T      | 32603825 | 1.7 | 1.2 | 2.3 | 0.001213 | 0.40 | 0.55 | 0.39 | SNP       |
| chr6_32375695_G_A      | 32375695 | 1.7 | 1.2 | 2.3 | 0.001225 | 0.28 | 0.42 | 0.27 | SNP       |
| chr6_32375280_T_C      | 32375280 | 1.7 | 1.2 | 2.3 | 0.001227 | 0.29 | 0.43 | 0.27 | SNP       |
| chr6_32607222_C_G      | 32607222 | 0.3 | 0.1 | 0.6 | 0.001252 | 0.10 | 0.03 | 0.11 | SNP       |
| chr6_31245821_A_G      | 31245821 | 2.2 | 1.3 | 3.4 | 0.001275 | 0.14 | 0.16 | 0.14 | SNP       |
| chr6_31239449_C_G      | 31239449 | 2.0 | 1.3 | 3.1 | 0.001307 | 0.17 | 0.20 | 0.16 | SNP       |
| chr6_31919956_T_C      | 31919956 | 0.3 | 0.2 | 0.6 | 0.001307 | 0.08 | 0.03 | 0.09 | SNP       |
| chr6_31916951_T_C      | 31916951 | 0.3 | 0.2 | 0.6 | 0.001321 | 0.08 | 0.03 | 0.09 | SNP       |
| chr6_31919917_T_C      | 31919917 | 0.3 | 0.2 | 0.6 | 0.001321 | 0.08 | 0.03 | 0.09 | SNP       |
| chr6_31910938_G_T      | 31910938 | 0.3 | 0.2 | 0.6 | 0.001322 | 0.08 | 0.03 | 0.09 | SNP       |
| chr6_31910929_G_A      | 31910929 | 0.3 | 0.2 | 0.6 | 0.001331 | 0.08 | 0.03 | 0.09 | SNP       |
| chr6_31237802_G_A      | 31237802 | 1.8 | 1.3 | 2.6 | 0.001343 | 0.35 | 0.37 | 0.35 | SNP       |
| chr6_31928306_G_A      | 31928306 | 0.3 | 0.2 | 0.6 | 0.001349 | 0.08 | 0.03 | 0.09 | SNP       |
| chr6_32634990_G_T      | 32634990 | 0.3 | 0.2 | 0.6 | 0.001364 | 0.09 | 0.03 | 0.09 | SNP       |
| chr6_32603321_C_T      | 32603321 | 0.4 | 0.4 | 0.6 | 0.001376 | 0.22 | 0.11 | 0.23 | SNP       |
| chr6_31429927_C_T      | 31429927 | 2.0 | 1.3 | 3.2 | 0.001383 | 0.16 | 0.18 | 0.16 | SNP       |
| chr6_31325532_A_G      | 31325532 | 1.8 | 1.3 | 2.7 | 0.001395 | 0.32 | 0.35 | 0.32 | SNP       |
| chr6_31325526_A_G      | 31325526 | 1.8 | 1.3 | 2.7 | 0.001414 | 0.33 | 0.35 | 0.32 | SNP       |
| chr6_31325529_G_A      | 31325529 | 1.8 | 1.3 | 2.7 | 0.001414 | 0.33 | 0.35 | 0.32 | SNP       |
| chr6_32607221_C_G      | 32607221 | 0.3 | 0.1 | 0.6 | 0.001418 | 0.09 | 0.03 | 0.10 | SNP       |
| chr6_31325521_C_G      | 31325521 | 1.8 | 1.3 | 2.7 | 0.001420 | 0.33 | 0.35 | 0.32 | SNP       |
| chr6_32020238_A_G      | 32020238 | 2.2 | 1.3 | 3.5 | 0.001451 | 0.17 | 0.23 | 0.16 | SNP       |
| chr6_31782030_A_G      | 32027038 | 1.7 | 1.2 | 2.3 | 0.001485 | 0.18 | 0.22 | 0.18 | SNP       |
| chr6_32491581_A_C      | 32491581 | 1.7 | 1.2 | 2.5 | 0.001488 | 0.26 | 0.41 | 0.25 | SNP       |
| chr6_31906865_C_T      | 31906865 | 0.3 | 0.2 | 0.6 | 0.001493 | 0.08 | 0.03 | 0.09 | SNP       |
| chr6_31905130_G_A      | 31905130 | 0.3 | 0.2 | 0.6 | 0.001502 | 0.08 | 0.03 | 0.09 | SNP       |
| chr6_31905326_G_T      | 31905326 | 0.3 | 0.2 | 0.6 | 0.001502 | 0.08 | 0.03 | 0.09 | SNP       |
| chr6_31907147_T_C      | 31907147 | 0.3 | 0.2 | 0.6 | 0.001502 | 0.08 | 0.03 | 0.09 | SNP       |
| chr6_31907168_C_T      | 31907168 | 0.3 | 0.2 | 0.6 | 0.001502 | 0.08 | 0.03 | 0.09 | SNP       |
| chr6_31322694_T_C      | 31322694 | 0.5 | 0.3 | 0.8 | 0.001578 | 0.12 | 0.10 | 0.12 | SNP       |
| chr6_31237460_G_A      | 31237460 | 1.8 | 1.2 | 2.6 | 0.001585 | 0.35 | 0.37 | 0.35 | SNP       |
| chr6_31502861_G_A      | 31502861 | 1.9 | 1.3 | 2.7 | 0.001591 | 0.23 | 0.29 | 0.22 | SNP       |
| chr6_32406530_G_A      | 32406530 | 1.6 | 1.2 | 2.2 | 0.001618 | 0.35 | 0.50 | 0.34 | SNP       |
| chr6_32609874_T_G      | 32609874 | 0.3 | 0.2 | 0.6 | 0.001640 | 0.08 | 0.03 | 0.09 | SNP       |
| chr6_32610075_G_A      | 32610075 | 0.3 | 0.2 | 0.6 | 0.001640 | 0.08 | 0.03 | 0.09 | SNP       |
| chr6_32610313_C_G      | 32610313 | 0.3 | 0.2 | 0.6 | 0.001640 | 0.08 | 0.03 | 0.09 | SNP       |
| chr6_31238535_C_T      | 31238535 | 1.8 | 1.2 | 2.5 | 0.001686 | 0.36 | 0.38 | 0.36 | SNP       |
| chr6_31325506_C_T      | 31325506 | 1.8 | 1.3 | 3.3 | 0.001696 | 0.15 | 0.17 | 0.15 | SNP       |
| chr6_32611759_G_C      | 32611759 | 0.3 | 0.2 | 0.6 | 0.001698 | 0.09 | 0.03 | 0.09 | SNP       |
| chr6_29693969_C_T      | 29693969 | 1.6 | 1.2 | 2.2 | 0.001754 | 0.23 | 0.28 | 0.23 | SNP       |
| chr6_32408527_C_G      | 32408527 | 1.6 | 1.2 | 2.2 | 0.001754 | 0.35 | 0.50 | 0.34 | SNP       |
| xHLA_2field_DB11_08_03 | 32427444 | 0.3 | 0.1 | 0.6 | 0.001756 | 0.08 | 0.02 | 0.09 | HLA (HLA) |
| chr6_29892815_A_G      | 29892815 | 1.8 | 1.2 | 2.7 | 0.001762 | 0.15 | 0.18 | 0.14 | SNP       |
| chr6_32078373_A_C      | 32078373 | 1.8 | 1.2 | 2.5 | 0.001787 | 0.11 | 0.16 | 0.11 | SNP       |
| chr6_32608934_A_T      | 32608934 | 0.3 | 0.2 | 0.6 | 0.001788 | 0.08 | 0.03 | 0.09 | SNP       |
| chr6_32077380_C_T      | 32077380 | 0.3 | 0.2 | 0.6 | 0.001791 | 0.08 | 0.03 | 0.09 | SNP       |
| chr6_31931137_C_T      | 31931137 | 0.5 | 0.3 | 0.7 | 0.001821 | 0.12 | 0.06 | 0.13 | SNP       |
| chr6_32608946_G_A      | 32608946 | 0.3 | 0.2 | 0.6 | 0.001831 | 0.09 | 0.03 | 0.09 | SNP       |
| chr6_32411833_C_T      | 32411833 | 1.6 | 1.2 | 2.2 | 0.001834 | 0.40 | 0.54 | 0.38 | SNP       |
| chr6_31238814_C_T      | 31238814 | 1.8 | 1.2 | 2.5 | 0.001837 | 0.38 | 0.41 | 0.38 | SNP       |
| chr6_32526702_C_T      | 32526702 | 0.3 | 0.2 | 0.6 | 0.001840 | 0.08 | 0.03 | 0.09 | SNP       |
| chr6_32610300_C_T      | 32610300 | 0.3 | 0.2 | 0.6 | 0.001851 | 0.08 | 0.03 | 0.09 | SNP       |
| chr6_32610688_G_C      | 32610688 | 0.3 | 0.2 | 0.6 | 0.001858 | 0.08 | 0.03 | 0.09 | SNP       |
| chr6_32611096_G_A      | 32611096 | 0.3 | 0.2 | 0.6 | 0.001860 | 0.09 | 0.03 | 0.09 | SNP       |
| chr6_29893960_T_C      | 29893960 | 1.7 | 1.2 | 2.4 | 0.001871 | 0.20 | 0.25 | 0.19 | SNP       |
| chr6_32610976_A_C      | 32610976 | 0.3 | 0.2 | 0.6 | 0.001876 | 0.09 | 0.03 | 0.09 | SNP       |
| chr6_32610996_G_A      | 32610996 | 0.3 | 0.2 | 0.6 | 0.001889 | 0.08 | 0.03 | 0.09 | SNP       |
| chr6_32607251_T_C      | 32607251 | 0.3 | 0.4 | 0.8 | 0.001927 | 0.37 | 0.27 | 0.38 | SNP       |
| chr6_32410941_C_T      | 32410941 | 0.6 | 0.4 | 0.8 | 0.001922 | 0.50 | 0.39 | 0.51 | SNP       |
| chr6_31914180_G_A      | 31914180 | 0.3 | 0.2 | 0.6 | 0.001927 | 0.08 | 0.03 | 0.09 | SNP       |
| chr6_32032421_C_T      | 32032421 | 0.4 | 0.2 | 0.7 | 0.001939 | 0.11 | 0.04 | 0.12 | SNP       |
| chr6_32410745_G_A      | 32410745 | 1.8 | 1.2 | 2.2 | 0.001956 | 0.39 | 0.53 | 0.38 | SNP       |
| chr6_32606912_A_G      | 32606912 | 0.5 | 0.3 | 0.8 | 0.001971 | 0.16 | 0.08 | 0.16 | SNP       |
| chr6_31506624_C_T      | 31506624 | 1.8 | 1.2 | 2.6 | 0.002000 | 0.23 | 0.29 | 0.23 | SNP       |
| chr6_32603405_C_T      | 32603405 | 0.3 | 0.2 | 0.6 | 0.002021 | 0.08 | 0.03 | 0.09 | SNP       |
| chr6_32606960_A_T      | 32606960 | 0.3 | 0.2 | 0.6 | 0.002021 | 0.08 | 0.03 | 0.09 | SNP       |
| chr6_32608967_A_G      | 32608967 | 0.3 | 0.2 | 0.6 | 0.002025 | 0.09 | 0.03 | 0.10 | SNP       |
| chr6_32611709_C_T      | 32611709 | 0.3 | 0.2 | 0.6 | 0.002044 | 0.08 | 0.03 | 0.09 | SNP       |
| chr6_31922254_C_A      | 31922254 | 1.8 | 1.2 | 2.6 | 0.002050 | 0.35 | 0.36 | 0.34 | SNP       |
| chr6_32606742_A_G      | 32606742 | 0.3 | 0.2 | 0.6 | 0.002081 | 0.08 | 0.03 | 0.09 | SNP       |
| chr6_32607270_A_G      | 32607270 | 0.3 | 0.1 | 0.6 | 0.002111 | 0.08 | 0.03 | 0.09 | SNP       |
| chr6_3241318_A_G       | 3241318  | 1.7 | 1.2 | 2.3 | 0.002113 | 0.28 | 0.41 | 0.26 | SNP       |
| chr6_31605861_A_G      | 31605861 | 0.3 | 0.2 | 0.6 | 0.002125 | 0.08 | 0.03 | 0.09 | SNP       |
| chr6_32609195_G_A      | 32609195 | 0.3 | 0.2 | 0.6 | 0.002158 | 0.09 | 0.03 | 0.09 | SNP       |
| chr6_32611215_C_T      | 32611215 | 0.3 | 0.2 | 0.6 | 0.002158 | 0.09 | 0.03 | 0.09 | SNP       |
| chr6_32606676_T_C      | 32606676 | 0.3 | 0.2 | 0.6 | 0.002180 | 0.08 | 0.03 | 0.09 | SNP       |
| chr6_32603500_C_T      | 32603500 | 0.3 | 0.2 | 0.6 | 0.002190 | 0.08 | 0.03 | 0.09 | SNP       |
| chr6_32604384_G_A      | 32604384 | 0.3 | 0.2 | 0.6 | 0.002200 | 0.08 | 0.03 | 0.09 | SNP       |
| chr6_32411035_C_A      | 32411035 | 0.6 | 0.4 | 0.8 | 0.002222 | 0.50 | 0.39 | 0.51 | SNP       |
| chr6_32441696_C_T      | 32441696 | 0.3 | 0.1 | 0.6 | 0.002324 | 0.07 | 0.03 | 0.07 | SNP       |
| chr6_32029205_G_A      | 32029205 | 3.3 | 1.5 | 7.0 | 0.002380 | 0.12 | 0.12 | 0.12 | SNP       |
| chr6_31248204_G_A      | 31248204 | 0.6 | 0.4 | 0.8 | 0.002402 | 0.32 | 0.33 | 0.32 | SNP       |
| chr6_30879636_C_T      | 30879636 | 2.5 | 1.4 | 4.5 | 0.002448 | 0.11 | 0.13 | 0.11 | SNP       |
| chr6_32607177_T_A      | 32607177 | 0.3 | 0.2 | 0.7 | 0.002464 | 0.08 | 0.03 | 0.09 | SNP       |
| chr6_31322487_G_A      | 31322487 | 0.5 | 0.3 | 0.8 | 0.002505 | 0.10 | 0.09 | 0.11 | SNP       |

|                   |          |     |     |     |          |      |      |      |     |
|-------------------|----------|-----|-----|-----|----------|------|------|------|-----|
| chr6_32005649_A_G | 32005649 | 0.5 | 0.3 | 0.8 | 0.003499 | 0.11 | 0.05 | 0.12 | SNP |
| chr6_31328293_A_G | 31328293 | 0.5 | 0.3 | 0.8 | 0.003511 | 0.10 | 0.10 | 0.09 | SNP |
| chr6_31370367_G_A | 31370367 | 0.5 | 0.3 | 0.8 | 0.003515 | 0.10 | 0.09 | 0.11 | SNP |
| chr6_29638434_A_G | 29638434 | 0.6 | 0.4 | 0.8 | 0.003620 | 0.15 | 0.09 | 0.15 | SNP |
| chr6_32610349_C_A | 32610349 | 1.6 | 1.2 | 2.1 | 0.003664 | 0.45 | 0.55 | 0.43 | SNP |
| chr6_32522698_G_T | 32522698 | 0.6 | 0.4 | 0.8 | 0.003693 | 0.41 | 0.33 | 0.42 | SNP |
| chr6_31508761_T_C | 31508761 | 1.7 | 1.2 | 2.5 | 0.003696 | 0.24 | 0.29 | 0.23 | SNP |
| chr6_32604660_C_T | 32604660 | 0.4 | 0.2 | 0.7 | 0.003711 | 0.09 | 0.03 | 0.10 | SNP |
| chr6_31370329_C_A | 31370329 | 0.5 | 0.3 | 0.8 | 0.003722 | 0.10 | 0.09 | 0.10 | SNP |
| chr6_32409305_A_G | 32409305 | 1.9 | 1.2 | 2.1 | 0.003822 | 0.39 | 0.53 | 0.38 | SNP |
| chr6_32559520_C_T | 32559520 | 1.6 | 1.2 | 2.1 | 0.003909 | 0.33 | 0.48 | 0.31 | SNP |
| chr6_31321268_G_T | 31321268 | 0.6 | 0.4 | 0.8 | 0.003922 | 0.20 | 0.15 | 0.20 | SNP |
| chr6_31540429_G_A | 31540429 | 1.5 | 1.1 | 2.0 | 0.003923 | 0.38 | 0.44 | 0.37 | SNP |
| chr6_29907740_A_G | 29907740 | 0.6 | 0.5 | 0.9 | 0.003949 | 0.47 | 0.45 | 0.47 | SNP |
| chr6_32441100_C_A | 32441100 | 0.6 | 0.4 | 0.8 | 0.003958 | 0.28 | 0.21 | 0.28 | SNP |
| chr6_31464992_G_A | 31464992 | 1.6 | 1.2 | 2.3 | 0.003982 | 0.29 | 0.32 | 0.28 | SNP |
| chr6_32603277_G_T | 32603277 | 0.3 | 0.1 | 0.6 | 0.004029 | 0.05 | 0.02 | 0.06 | SNP |
| chr6_31561211_G_T | 31561211 | 1.7 | 1.2 | 2.3 | 0.004047 | 0.26 | 0.31 | 0.26 | SNP |
| chr6_32610947_A_C | 32610947 | 0.3 | 0.1 | 0.6 | 0.004064 | 0.06 | 0.02 | 0.06 | SNP |
| chr6_31734345_G_T | 31734345 | 3.6 | 1.5 | 8.4 | 0.004080 | 0.12 | 0.13 | 0.12 | SNP |
| chr6_31320849_T_C | 31320849 | 0.5 | 0.3 | 0.8 | 0.004091 | 0.10 | 0.09 | 0.10 | SNP |
| chr6_32606682_C_G | 32606682 | 0.3 | 0.1 | 0.6 | 0.004123 | 0.05 | 0.02 | 0.06 | SNP |
| chr6_31601735_G_A | 31601735 | 0.3 | 0.1 | 0.6 | 0.004128 | 0.06 | 0.02 | 0.06 | SNP |
| chr6_32406807_G_A | 32406807 | 1.7 | 1.2 | 2.4 | 0.004157 | 0.37 | 0.55 | 0.36 | SNP |
| chr6_32606691_T_G | 32606691 | 0.3 | 0.1 | 0.6 | 0.004167 | 0.05 | 0.02 | 0.06 | SNP |
| chr6_30796545_T_C | 30796545 | 2.1 | 1.3 | 3.5 | 0.004215 | 0.12 | 0.14 | 0.12 | SNP |
| chr6_32609047_C_T | 32609047 | 0.3 | 0.1 | 0.6 | 0.004245 | 0.05 | 0.02 | 0.06 | SNP |
| chr6_31324955_C_T | 31324955 | 0.5 | 0.3 | 0.8 | 0.004281 | 0.10 | 0.09 | 0.10 | SNP |
| chr6_31281722_T_C | 31281722 | 1.1 | 0.7 | 1.5 | 0.004313 | 0.47 | 0.51 | 0.46 | SNP |
| chr6_31947086_G_A | 31947086 | 0.5 | 0.3 | 0.8 | 0.004307 | 0.11 | 0.05 | 0.12 | SNP |
| chr6_32709990_C_T | 32709990 | 0.6 | 0.4 | 0.9 | 0.004351 | 0.32 | 0.22 | 0.33 | SNP |
| chr6_32604166_A_G | 32604166 | 0.3 | 0.1 | 0.6 | 0.004369 | 0.06 | 0.02 | 0.06 | SNP |
| chr6_32441129_G_A | 32441129 | 0.3 | 0.1 | 0.6 | 0.004455 | 0.06 | 0.02 | 0.06 | SNP |
| chr6_32609009_T_G | 32609009 | 0.3 | 0.1 | 0.6 | 0.004475 | 0.06 | 0.02 | 0.06 | SNP |
| chr6_32710010_G_T | 32710010 | 0.6 | 0.4 | 0.9 | 0.004497 | 0.32 | 0.22 | 0.33 | SNP |
| chr6_32709964_T_C | 32709964 | 0.6 | 0.4 | 0.9 | 0.004555 | 0.32 | 0.22 | 0.33 | SNP |
| chr6_32559076_A_G | 32559076 | 0.6 | 0.4 | 0.9 | 0.004591 | 0.34 | 0.25 | 0.35 | SNP |
| chr6_32609425_C_G | 32609425 | 0.3 | 0.1 | 0.6 | 0.004607 | 0.06 | 0.02 | 0.06 | SNP |
| chr6_32603896_T_C | 32603896 | 0.3 | 0.1 | 0.6 | 0.004610 | 0.06 | 0.02 | 0.06 | SNP |
| chr6_32608350_G_A | 32608350 | 0.7 | 0.2 | 0.7 | 0.004621 | 0.10 | 0.03 | 0.10 | SNP |
| chr6_29856774_G_T | 29856774 | 1.7 | 1.2 | 2.5 | 0.004622 | 0.15 | 0.17 | 0.14 | SNP |
| chr6_31366295_C_A | 31366295 | 0.5 | 0.3 | 0.8 | 0.004639 | 0.11 | 0.10 | 0.11 | SNP |
| chr6_32013500_C_A | 32013500 | 0.4 | 0.2 | 0.7 | 0.004664 | 0.10 | 0.04 | 0.10 | SNP |
| chr6_32338299_A_G | 32338299 | 0.9 | 0.1 | 0.6 | 0.004676 | 0.05 | 0.01 | 0.05 | SNP |
| chr6_31464571_T_C | 31464571 | 1.6 | 1.2 | 2.2 | 0.004678 | 0.29 | 0.32 | 0.28 | SNP |
| chr6_32606376_C_G | 32606376 | 0.3 | 0.1 | 0.6 | 0.004706 | 0.06 | 0.02 | 0.06 | SNP |
| chr6_31325115_G_A | 31325115 | 1.7 | 1.2 | 2.5 | 0.004722 | 0.34 | 0.35 | 0.34 | SNP |
| chr6_31498407_A_C | 31498407 | 1.2 | 0.7 | 1.2 | 0.004755 | 0.23 | 0.28 | 0.22 | SNP |
| chr6_32441046_G_A | 32441046 | 0.3 | 0.1 | 0.6 | 0.004820 | 0.06 | 0.02 | 0.06 | SNP |
| chr6_32608435_T_C | 32608435 | 0.3 | 0.1 | 0.6 | 0.004870 | 0.06 | 0.02 | 0.06 | SNP |
| chr6_32797809_C_T | 32797809 | 1.6 | 1.1 | 2.2 | 0.004900 | 0.11 | 0.17 | 0.11 | SNP |
| chr6_32310863_T_C | 32310863 | 1.7 | 1.3 | 2.3 | 0.004931 | 0.12 | 0.12 | 0.12 | SNP |
| chr6_31624864_A_G | 31624864 | 3.1 | 1.4 | 6.9 | 0.004941 | 0.12 | 0.11 | 0.12 | SNP |
| chr6_32628606_C_A | 32628606 | 0.3 | 0.1 | 0.6 | 0.004965 | 0.05 | 0.02 | 0.06 | SNP |
| chr6_32439696_T_G | 32439696 | 0.3 | 0.1 | 0.6 | 0.004985 | 0.06 | 0.02 | 0.06 | SNP |
| chr6_31513864_A_G | 31513864 | 1.7 | 1.2 | 2.5 | 0.004991 | 0.23 | 0.28 | 0.23 | SNP |
| chr6_31326629_T_C | 31326629 | 1.7 | 1.2 | 2.4 | 0.005001 | 0.34 | 0.35 | 0.34 | SNP |
| chr6_31540556_T_C | 31540556 | 0.6 | 0.4 | 0.9 | 0.005017 | 0.23 | 0.19 | 0.24 | SNP |
| chr6_29693938_G_A | 29693938 | 0.6 | 0.4 | 0.8 | 0.005019 | 0.14 | 0.09 | 0.15 | SNP |
| chr6_31320164_G_A | 31320164 | 0.6 | 0.4 | 0.8 | 0.005049 | 0.23 | 0.22 | 0.22 | SNP |
| chr6_31324891_C_T | 31324891 | 0.5 | 0.3 | 0.8 | 0.005054 | 0.11 | 0.09 | 0.11 | SNP |
| chr6_31325792_G_A | 31325792 | 1.6 | 1.2 | 2.3 | 0.005141 | 0.35 | 0.37 | 0.35 | SNP |
| chr6_32080191_G_C | 32080191 | 3.1 | 1.4 | 6.8 | 0.005149 | 0.12 | 0.11 | 0.12 | SNP |
| chr6_32942302_A_G | 32942302 | 0.7 | 0.5 | 0.9 | 0.005158 | 0.41 | 0.33 | 0.41 | SNP |
| chr6_31634193_A_G | 31634193 | 1.5 | 1.1 | 2.0 | 0.005161 | 0.38 | 0.43 | 0.38 | SNP |
| chr6_32187605_G_A | 32187605 | 1.5 | 1.1 | 2.0 | 0.005167 | 0.50 | 0.54 | 0.49 | SNP |
| chr6_29691019_G_T | 29691019 | 0.7 | 0.5 | 0.9 | 0.005191 | 0.44 | 0.41 | 0.44 | SNP |
| chr6_31248169_C_T | 31248169 | 2.1 | 1.2 | 3.5 | 0.005243 | 0.14 | 0.15 | 0.14 | SNP |
| chr6_31463680_A_G | 31463680 | 1.6 | 1.1 | 2.2 | 0.005272 | 0.29 | 0.32 | 0.29 | SNP |
| chr6_32442703_G_A | 32442703 | 0.3 | 0.1 | 0.6 | 0.005280 | 0.05 | 0.02 | 0.06 | SNP |
| chr6_31927342_G_A | 31927342 | 1.2 | 0.7 | 1.2 | 0.005291 | 0.34 | 0.35 | 0.34 | SNP |
| chr6_31430143_C_G | 31430143 | 0.6 | 0.4 | 0.8 | 0.005346 | 0.18 | 0.14 | 0.19 | SNP |
| chr6_32164869_G_C | 32164869 | 0.7 | 0.5 | 0.9 | 0.005578 | 0.29 | 0.26 | 0.29 | SNP |
| chr6_32086427_C_G | 32086427 | 2.2 | 1.3 | 3.9 | 0.005638 | 0.11 | 0.12 | 0.11 | SNP |
| chr6_32465402_C_G | 32465402 | 0.3 | 0.1 | 0.6 | 0.005640 | 0.06 | 0.02 | 0.06 | SNP |
| chr6_31322703_C_T | 31322703 | 0.5 | 0.3 | 0.8 | 0.005680 | 0.11 | 0.10 | 0.11 | SNP |
| chr6_31325092_G_A | 31325092 | 1.7 | 1.2 | 2.5 | 0.005695 | 0.33 | 0.35 | 0.33 | SNP |
| chr6_32782387_G_A | 32782387 | 1.5 | 1.1 | 2.1 | 0.005743 | 0.21 | 0.25 | 0.21 | SNP |
| chr6_29901806_C_T | 29901806 | 0.6 | 0.4 | 0.9 | 0.005740 | 0.22 | 0.26 | 0.21 | SNP |
| chr6_31528326_C_G | 31528326 | 1.5 | 1.1 | 2.0 | 0.005806 | 0.38 | 0.44 | 0.38 | SNP |
| chr6_32153409_A_C | 32153409 | 1.5 | 1.1 | 2.1 | 0.005849 | 0.39 | 0.50 | 0.38 | SNP |
| chr6_31324595_C_G | 31324595 | 0.6 | 0.4 | 0.9 | 0.005923 | 0.31 | 0.25 | 0.31 | SNP |
| chr6_32628545_T_C | 32628545 | 0.3 | 0.1 | 0.6 | 0.005927 | 0.05 | 0.02 | 0.06 | SNP |
| chr6_32340068_T_C | 32340068 | 0.7 | 0.5 | 0.9 | 0.005932 | 0.50 | 0.39 | 0.51 | SNP |
| chr6_32628843_C_T | 32628843 | 0.3 | 0.1 | 0.7 | 0.005988 | 0.05 | 0.02 | 0.06 | SNP |
| chr6_31324348_G_T | 31324348 | 0.5 | 0.3 | 0.8 | 0.006022 | 0.11 | 0.09 | 0.11 | SNP |
| chr6_29891137_A_G | 29891137 | 1.5 | 1.1 | 2.0 | 0.006023 | 0.34 | 0.38 | 0.23 | SNP |
| chr6_32056580_A_C | 32056580 | 0.4 | 0.2 | 0.8 | 0.006146 | 0.09 | 0.04 | 0.10 | SNP |
| chr6_32633273_T_G | 32633273 | 0.6 | 0.5 | 0.9 | 0.006197 | 0.36 | 0.27 | 0.37 | SNP |
| chr6_32551638_C_T | 32551638 | 0.4 | 0.2 | 0.7 | 0.006201 | 0.07 | 0.03 | 0.08 | SNP |
| chr6_31301891_T_A | 31301891 | 2.6 | 1.3 | 5.2 | 0.006329 | 2.6  | 1.2  | 1.2  | SNP |
| chr6_32724857_C_T | 32724857 | 1.6 | 1.1 | 2.3 | 0.006340 | 0.09 | 0.14 | 0.09 | SNP |
| chr6_32169574_T_C | 32169574 | 0.7 | 0.5 | 0.9 | 0.006368 | 0.30 | 0.26 | 0.30 | SNP |
| chr6_32727222_C_A | 32727222 | 0.3 | 0.1 | 0.6 | 0.006368 | 0.05 | 0.02 | 0.05 | SNP |
| chr6_29858253_T_C | 29858253 | 1.7 | 1.2 | 2.5 | 0.006458 | 0.14 | 0.17 | 0.14 | SNP |
| chr6_31629995_G_C | 31629995 | 0.3 | 0.1 | 0.7 | 0.006529 | 0.06 | 0.02 | 0.07 | SNP |
| chr6_29896108_A_T | 29896108 | 1.7 | 1.1 | 2.5 | 0.006630 | 0.16 | 0.18 | 0.15 | SNP |
| chr6_31473844_C_T | 31473844 | 1.6 | 1.1 | 2.2 | 0.006730 | 0.29 | 0.32 | 0.29 | SNP |
| chr6_32498208_G_T | 32498208 | 1.5 | 1.1 | 2.1 | 0.006844 | 0.30 | 0.43 | 0.28 | SNP |
| chr6_32409242_C_A | 32409242 | 0.7 | 0.5 | 0.9 | 0.006866 | 0.43 | 0.31 | 0.45 | SNP |
| chr6_29896713_G_A | 29896713 | 1.5 | 1.1 | 2.1 | 0.006922 | 0.23 | 0.27 | 0.23 | SNP |
| chr6_32035427_T_C | 32035427 | 0.4 | 0.2 | 0.8 | 0.007011 | 0.09 | 0.04 | 0.10 | SNP |
| chr6_31236115_T_C | 31236115 | 1.5 | 1.1 | 2.0 | 0.007055 | 0.40 | 0.43 | 0.40 | SNP |
| chr6_32556677_C_A | 32556677 | 1.7 | 1.2 | 2.6 | 0.007158 | 0.10 | 0.17 | 0.10 | SNP |
| chr6_32303160_G_T | 32303160 | 0.3 | 0.1 | 0.6 | 0.007170 | 0.05 | 0.02 | 0.05 | SNP |
| chr6_31463621_G_A | 31463621 | 1.6 | 1.1 | 2.2 | 0.007209 | 0.29 | 0.33 | 0.29 | SNP |
| chr6_31238851_C_T | 31238851 | 1.8 | 1.2 | 2.7 | 0.007239 | 0.31 | 0.32 | 0.31 | SNP |
| chr6_32261940_G_C | 32261940 | 0.3 | 0.1 | 0.6 | 0.007242 | 0.05 | 0.02 | 0.05 | SNP |
| chr6_29893922_A_T | 29893922 | 1.6 | 1.1 | 2.2 | 0.007249 | 0.20 | 0.24 | 0.20 | SNP |
| chr6_31379752_C_T | 31379752 | 1.8 | 1.2 | 2.8 | 0.007318 | 0.07 | 0.10 | 0.07 | SNP |
| chr6_32261252_T_G | 32261252 | 2.6 | 1.3 | 5.1 | 0.007322 | 0.12 | 0.12 | 0.12 | SNP |
| chr6_32290208_C_T | 32290208 | 2.6 | 1.3 | 5.1 | 0.007322 | 0.12 | 0.12 | 0.12 | SNP |
| chr6_32786833_C_G | 32786833 | 0.7 | 0.5 | 0.9 | 0.007547 | 0.38 | 0.31 | 0.39 | SNP |
| chr6_32627244_G_T | 32627244 | 2.2 | 1.2 | 4.0 | 0.007565 | 0.13 | 0.14 | 0.12 | SNP |
| chr6_3154         |          |     |     |     |          |      |      |      |     |

|                     |          |     |     |     |          |      |      |      |            |
|---------------------|----------|-----|-----|-----|----------|------|------|------|------------|
| chr6_29893982_C_T   | 29893982 | 1.6 | 1.1 | 2.3 | 0.010033 | 0.19 | 0.22 | 0.19 | SNP        |
| chr6_33036717_C_G   | 33036717 | 0.4 | 0.4 | 0.5 | 0.010044 | 0.14 | 0.14 | 0.15 | SNP        |
| chr6_32339498_C_G   | 32339498 | 0.3 | 0.1 | 0.7 | 0.010052 | 0.05 | 0.02 | 0.05 | SNP        |
| chr6_29858840_A_C   | 29858840 | 1.7 | 1.1 | 2.4 | 0.010096 | 0.15 | 0.17 | 0.14 | SNP        |
| chr6_32412539_G_A   | 32412539 | 0.7 | 0.5 | 0.9 | 0.010172 | 0.47 | 0.37 | 0.48 | SNP        |
| chr6_30851409_C_A   | 30851409 | 2.3 | 1.2 | 4.3 | 0.010176 | 0.12 | 0.14 | 0.12 | SNP        |
| chr6_33036708_C_T   | 33036708 | 0.6 | 0.4 | 0.9 | 0.010255 | 0.14 | 0.08 | 0.15 | SNP        |
| chr6_33036709_A_G   | 33036709 | 0.6 | 0.4 | 0.9 | 0.010255 | 0.14 | 0.08 | 0.15 | SNP        |
| chr6_32796793_G_A   | 32796793 | 1.6 | 1.1 | 2.4 | 0.010277 | 0.09 | 0.15 | 0.09 | SNP        |
| chr6_32400781_C_T   | 32400781 | 1.5 | 1.1 | 2.0 | 0.010284 | 0.39 | 0.52 | 0.38 | SNP        |
| chr6_32410215_T_C   | 32410215 | 0.6 | 0.4 | 0.9 | 0.010357 | 0.22 | 0.15 | 0.23 | SNP        |
| chr6_32178773_T_C   | 32178773 | 0.7 | 0.5 | 0.9 | 0.010362 | 0.48 | 0.42 | 0.48 | SNP        |
| chr6_31616365_G_A   | 31616365 | 1.4 | 1.1 | 1.9 | 0.010400 | 0.39 | 0.41 | 0.38 | SNP        |
| chr6_32339348_C_T   | 32339348 | 0.6 | 0.5 | 0.9 | 0.010524 | 0.34 | 0.27 | 0.35 | SNP        |
| chr6_32303848_G_A   | 32303848 | 1.6 | 1.1 | 2.2 | 0.010601 | 0.24 | 0.35 | 0.23 | SNP        |
| chr6_32410210_T_C   | 32410210 | 0.6 | 0.4 | 0.9 | 0.010617 | 0.22 | 0.15 | 0.23 | SNP        |
| chr6_32442296_C_T   | 32442296 | 0.6 | 0.4 | 0.9 | 0.010619 | 0.29 | 0.21 | 0.30 | SNP        |
| chr6_32725271_G_A   | 32725271 | 0.6 | 0.4 | 0.9 | 0.010660 | 0.21 | 0.14 | 0.22 | SNP        |
| chr6_32796751_T_C   | 32796751 | 0.6 | 0.4 | 0.9 | 0.010697 | 0.23 | 0.14 | 0.24 | SNP        |
| chr6_31607952_G_A   | 31607952 | 0.4 | 0.2 | 0.8 | 0.010751 | 0.06 | 0.02 | 0.06 | SNP        |
| chr6_32498205_G_T   | 32498205 | 1.5 | 1.1 | 2.0 | 0.010891 | 0.30 | 0.43 | 0.28 | SNP        |
| chr6_31934372_T_T   | 31934372 | 0.5 | 0.3 | 0.8 | 0.010942 | 0.12 | 0.06 | 0.12 | SNP        |
| chr6_32633519_A_G   | 32633519 | 0.6 | 0.4 | 0.9 | 0.010943 | 0.15 | 0.12 | 0.15 | SNP        |
| chr6_32014575_A_G   | 32014575 | 0.7 | 0.5 | 0.9 | 0.010958 | 0.48 | 0.48 | 0.48 | SNP        |
| chr6_31627445_C_G   | 31627445 | 1.5 | 1.1 | 2.0 | 0.010979 | 0.18 | 0.23 | 0.18 | SNP        |
| chr6_32035603_C_T   | 32035603 | 0.4 | 0.2 | 0.8 | 0.011296 | 0.09 | 0.04 | 0.10 | SNP        |
| chr6_31996524_C_A   | 31996524 | 0.4 | 0.2 | 0.8 | 0.011320 | 0.07 | 0.03 | 0.08 | SNP        |
| chr6_31473286_T_C   | 31473286 | 1.6 | 1.1 | 2.2 | 0.011321 | 0.28 | 0.31 | 0.28 | SNP        |
| chr6_31414480_A_G   | 31414480 | 0.5 | 0.5 | 0.9 | 0.011461 | 0.47 | 0.37 | 0.46 | SNP        |
| chr6_31542308_T_C   | 31542308 | 0.6 | 0.5 | 0.9 | 0.011480 | 0.19 | 0.17 | 0.19 | SNP        |
| chr6_32409060_G_A   | 32409060 | 0.6 | 0.4 | 0.9 | 0.011493 | 0.22 | 0.16 | 0.23 | SNP        |
| chr6_3252703_T_G    | 3252703  | 0.6 | 0.4 | 0.9 | 0.011652 | 0.40 | 0.33 | 0.41 | SNP        |
| chr6_32408497_A_G   | 32408497 | 2.5 | 1.2 | 4.9 | 0.011767 | 0.12 | 0.12 | 0.12 | SNP        |
| chr6_32375745_A_G   | 32375745 | 1.5 | 1.1 | 2.1 | 0.011789 | 0.48 | 0.58 | 0.47 | SNP        |
| chr6_32376618_C_T   | 32376618 | 1.5 | 1.1 | 2.1 | 0.011789 | 0.48 | 0.58 | 0.47 | SNP        |
| chr6_32498206_T_C   | 32498206 | 1.5 | 1.1 | 2.0 | 0.011970 | 0.30 | 0.43 | 0.28 | SNP        |
| chr6_30229267_G_C   | 30229267 | 2.0 | 1.2 | 3.4 | 0.012015 | 2.0  | 1.0  | 2.1  | SNP        |
| chr6_32025870_C_T   | 32025870 | 0.4 | 0.2 | 0.8 | 0.012305 | 0.09 | 0.04 | 0.10 | SNP        |
| chr6_29895626_T_A   | 29895626 | 1.6 | 1.1 | 2.4 | 0.012496 | 0.15 | 0.17 | 0.15 | SNP        |
| chr6_32604968_A_C   | 32604968 | 0.6 | 0.4 | 0.9 | 0.012615 | 0.25 | 0.18 | 0.26 | SNP        |
| chr6_32628098_G_C   | 32628098 | 0.3 | 0.1 | 0.7 | 0.012715 | 0.05 | 0.02 | 0.05 | SNP        |
| chr6_32340871_C_T   | 32340871 | 2.5 | 1.2 | 4.9 | 0.012763 | 0.12 | 0.12 | 0.12 | SNP        |
| chr6_32409787_T_C   | 32409787 | 1.5 | 1.1 | 2.0 | 0.012816 | 0.39 | 0.52 | 0.38 | SNP        |
| chr6_32348426_C_T   | 32348426 | 0.5 | 0.3 | 0.6 | 0.012847 | 0.09 | 0.06 | 0.10 | SNP        |
| chr6_29691857_C_G   | 29691857 | 0.7 | 0.5 | 0.9 | 0.012888 | 0.46 | 0.43 | 0.46 | SNP        |
| xHLA_rfield_C_03_04 |          | 0.6 | 0.4 | 0.9 | 0.013371 | 0.15 | 0.15 | 0.15 | HLA (xHLA) |
| chr6_32011369_G_T   | 32011369 | 0.4 | 0.2 | 0.8 | 0.013430 | 0.09 | 0.04 | 0.10 | SNP        |
| chr6_31929014_C_A   | 31929014 | 1.1 | 0.8 | 1.4 | 0.013501 | 0.34 | 0.34 | 0.34 | SNP        |
| chr6_32410691_G_A   | 32410691 | 0.6 | 0.4 | 0.9 | 0.013679 | 0.22 | 0.16 | 0.23 | SNP        |
| chr6_32709204_G_C   | 32709204 | 0.6 | 0.4 | 0.9 | 0.013727 | 0.21 | 0.14 | 0.22 | SNP        |
| chr6_29924889_C_A   | 29924889 | 0.7 | 0.5 | 0.9 | 0.014018 | 0.40 | 0.40 | 0.40 | SNP        |
| chr6_31349921_C_T   | 31349921 | 2.0 | 1.2 | 3.4 | 0.014098 | 0.12 | 0.11 | 0.12 | SNP        |
| chr6_29901865_G_C   | 29901865 | 1.4 | 1.1 | 1.9 | 0.014103 | 0.28 | 0.31 | 0.28 | SNP        |
| chr6_32373698_G_T   | 32373698 | 1.5 | 1.1 | 2.0 | 0.014302 | 0.38 | 0.50 | 0.36 | SNP        |
| chr6_32412809_T_A   | 32412809 | 0.6 | 0.4 | 0.9 | 0.014616 | 0.22 | 0.16 | 0.23 | SNP        |
| chr6_32812528_C_T   | 32812528 | 1.4 | 1.1 | 2.0 | 0.014622 | 0.16 | 0.20 | 0.16 | SNP        |
| chr6_32164587_C_T   | 32164587 | 0.4 | 0.1 | 0.7 | 0.014657 | 0.04 | 0.02 | 0.05 | SNP        |
| chr6_32412592_G_A   | 32412592 | 0.6 | 0.4 | 0.9 | 0.014718 | 0.22 | 0.16 | 0.23 | SNP        |
| chr6_32412398_T_C   | 32412398 | 0.7 | 0.5 | 0.9 | 0.014887 | 0.47 | 0.38 | 0.48 | SNP        |
| chr6_32707985_G_A   | 32707985 | 0.6 | 0.4 | 0.9 | 0.014911 | 0.21 | 0.14 | 0.22 | SNP        |
| chr6_31607050_T_C   | 31607050 | 1.8 | 1.1 | 2.9 | 0.015074 | 0.19 | 0.21 | 0.19 | SNP        |
| chr6_31657701_C_A   | 31657701 | 1.5 | 1.1 | 2.2 | 0.015108 | 0.15 | 0.21 | 0.14 | SNP        |
| chr6_31844884_A_G   | 31844884 | 0.4 | 0.2 | 0.8 | 0.015162 | 0.07 | 0.03 | 0.07 | SNP        |
| chr6_32411307_C_T   | 32411307 | 0.6 | 0.4 | 0.9 | 0.015170 | 0.22 | 0.16 | 0.23 | SNP        |
| chr6_32412566_T_A   | 32412566 | 0.6 | 0.4 | 0.9 | 0.015170 | 0.22 | 0.16 | 0.23 | SNP        |
| chr6_32192436_A_G   | 32192436 | 0.5 | 0.2 | 0.8 | 0.015187 | 0.07 | 0.03 | 0.07 | SNP        |
| chr6_31498737_G_A   | 31498737 | 0.6 | 0.5 | 0.9 | 0.015255 | 0.16 | 0.15 | 0.16 | SNP        |
| chr6_29892732_G_A   | 29892732 | 1.5 | 1.1 | 2.0 | 0.015280 | 0.20 | 0.24 | 0.20 | SNP        |
| chr6_32550591_G_A   | 32550591 | 0.4 | 0.2 | 0.8 | 0.015354 | 0.06 | 0.03 | 0.06 | SNP        |
| chr6_32376882_T_G   | 32376882 | 1.5 | 1.1 | 2.0 | 0.015539 | 0.48 | 0.57 | 0.47 | SNP        |
| chr6_31539768_G_C   | 31539768 | 0.4 | 0.1 | 1.9 | 0.015562 | 0.35 | 0.40 | 0.34 | SNP        |
| chr6_32822186_T_G   | 32822186 | 0.4 | 0.2 | 0.8 | 0.015701 | 0.05 | 0.03 | 0.06 | SNP        |
| chr6_32184024_C_T   | 32184024 | 0.6 | 0.4 | 0.9 | 0.015792 | 0.14 | 0.11 | 0.14 | SNP        |
| chr6_32192617_T_C   | 32192617 | 0.4 | 0.2 | 0.8 | 0.015815 | 0.05 | 0.02 | 0.06 | SNP        |
| chr6_31601513_A_G   | 31601513 | 1.4 | 1.1 | 1.9 | 0.015916 | 0.39 | 0.41 | 0.38 | SNP        |
| chr6_31506801_G_A   | 31506801 | 0.7 | 0.5 | 0.9 | 0.015920 | 0.16 | 0.15 | 0.16 | SNP        |
| chr6_29912188_T_C   | 29912188 | 0.7 | 0.5 | 0.9 | 0.015978 | 0.43 | 0.42 | 0.43 | SNP        |
| chr6_32604551_C_T   | 32604551 | 2.2 | 1.1 | 4.0 | 0.016171 | 0.13 | 0.13 | 0.13 | SNP        |
| chr6_32943345_C_T   | 32943345 | 0.7 | 0.5 | 0.9 | 0.016185 | 0.46 | 0.39 | 0.46 | SNP        |
| chr6_32973281_C_T   | 32973281 | 0.7 | 0.6 | 0.9 | 0.016295 | 0.46 | 0.39 | 0.47 | SNP        |
| chr6_31324953_T_C   | 31324953 | 1.6 | 1.1 | 2.3 | 0.016349 | 0.37 | 0.39 | 0.37 | SNP        |
| chr6_31465915_C_G   | 31465915 | 1.5 | 1.1 | 2.1 | 0.016358 | 0.29 | 0.31 | 0.28 | SNP        |
| chr6_29910378_C_T   | 29910378 | 0.7 | 0.5 | 0.9 | 0.016482 | 0.35 | 0.34 | 0.35 | SNP        |
| chr6_32189921_A_G   | 32189921 | 2.1 | 1.1 | 3.6 | 0.016550 | 0.13 | 0.13 | 0.13 | SNP        |
| chr6_32634893_G_A   | 32634893 | 0.6 | 0.4 | 0.9 | 0.016586 | 0.14 | 0.11 | 0.14 | SNP        |
| chr6_32559516_T_C   | 32559516 | 0.7 | 0.5 | 0.9 | 0.016659 | 0.44 | 0.35 | 0.44 | SNP        |
| chr6_31321883_G_A   | 31321883 | 0.4 | 0.2 | 0.9 | 0.016660 | 0.14 | 0.13 | 0.14 | SNP        |
| chr6_31477461_T_C   | 31477461 | 1.5 | 1.1 | 2.1 | 0.016904 | 0.28 | 0.31 | 0.28 | SNP        |
| chr6_30878857_G_A   | 30878857 | 0.5 | 0.3 | 0.9 | 0.016906 | 0.06 | 0.06 | 0.06 | SNP        |
| chr6_33037660_G_A   | 33037660 | 0.6 | 0.3 | 0.9 | 0.017036 | 0.12 | 0.06 | 0.12 | SNP        |
| chr6_32376932_T_C   | 32376932 | 1.5 | 1.1 | 2.0 | 0.017080 | 0.48 | 0.57 | 0.47 | SNP        |
| chr6_33036401_C_T   | 33036401 | 0.6 | 0.4 | 0.9 | 0.017225 | 0.15 | 0.09 | 0.15 | SNP        |
| chr6_31930462_G_A   | 31930462 | 0.6 | 0.4 | 0.9 | 0.017454 | 0.14 | 0.09 | 0.14 | SNP        |
| chr6_31837277_T_A   | 31837277 | 1.5 | 1.1 | 2.0 | 0.017540 | 0.49 | 0.49 | 0.49 | SNP        |
| chr6_29892107_C_T   | 29892107 | 1.5 | 1.1 | 2.0 | 0.017712 | 0.21 | 0.24 | 0.20 | SNP        |
| chr6_31675765_G_A   | 31675765 | 1.5 | 1.1 | 2.1 | 0.018018 | 0.19 | 0.24 | 0.19 | SNP        |
| chr6_31321425_T_C   | 31321425 | 0.7 | 0.5 | 0.9 | 0.018040 | 0.21 | 0.18 | 0.21 | SNP        |
| chr6_31320241_G_A   | 31320241 | 1.5 | 1.1 | 2.1 | 0.018040 | 0.21 | 0.25 | 0.21 | SNP        |
| chr6_31239827_T_C   | 31239827 | 1.6 | 1.1 | 2.3 | 0.018078 | 0.37 | 0.38 | 0.37 | SNP        |
| chr6_29912595_G_A   | 29912595 | 0.7 | 0.6 | 0.9 | 0.018124 | 0.41 | 0.40 | 0.41 | SNP        |
| chr6_31245080_G_A   | 31245080 | 1.9 | 1.1 | 3.2 | 0.018316 | 0.04 | 0.06 | 0.04 | SNP        |
| chr6_32370835_T_C   | 32370835 | 1.4 | 1.1 | 2.0 | 0.018546 | 0.17 | 0.37 | 0.49 | SNP        |
| chr6_31239869_T_C   | 31239869 | 0.7 | 0.5 | 0.9 | 0.018724 | 0.30 | 0.24 | 0.30 | SNP        |
| chr6_32559400_A_T   | 32559400 | 1.5 | 1.1 | 2.0 | 0.018801 | 0.50 | 0.57 | 0.49 | SNP        |
| chr6_32814244_A_T   | 32814244 | 0.6 | 0.4 | 0.9 | 0.018846 | 0.11 | 0.06 | 0.11 | SNP        |
| chr6_33045698_G_A   | 33045698 | 0.3 | 0.1 | 0.8 | 0.018906 | 0.04 | 0.02 | 0.05 | SNP        |
| chr6_32306480_A_T   | 32306480 | 0.4 | 0.2 | 0.8 | 0.018981 | 0.07 | 0.03 | 0.07 | SNP        |
| chr6_32813279_G_A   | 32813279 | 0.6 | 0.4 | 0.9 | 0.019003 | 0.11 | 0.06 | 0.11 | SNP        |
| chr6_31639689_C_T   | 31639689 | 1.5 | 1.1 | 2.1 | 0.019196 | 0.18 | 0.22 | 0.18 | SNP        |
| chr6_33382384_A_G   | 33382384 | 0.5 | 0.3 | 0.9 | 0.019294 | 0.09 | 0.06 | 0.09 | SNP        |
| chr6_31509432_A_G   | 31509432 | 1.5 | 1.1 | 2.0 | 0.019303 | 0.31 | 0.35 | 0.31 | SNP        |
| chr6_32501211_G_A   | 32501211 | 1.6 | 1.1 | 2.5 | 0.019326 | 0.19 | 0.23 | 0.19 | SNP        |
| chr6_32797876_G_A   | 32797876 | 0.7 | 0.5 | 0.9 | 0.019356 | 0.41 | 0.31 | 0.42 | SNP        |
| chr6_32408842_A_G   | 32408842 | 0.6 | 0.4 | 0.9 | 0.019368 | 0.22 | 0.16 | 0.23 | SNP        |
| chr6_29908491_G_A   | 29908491 | 1.4 | 1.1 | 1.9 | 0.019498 | 0.18 | 0.23 | 0.18 | SNP        |
| chr6_29909797_C_T</ |          |     |     |     |          |      |      |      |            |

|                       |          |     |     |     |          |      |      |      |           |
|-----------------------|----------|-----|-----|-----|----------|------|------|------|-----------|
| chr6_31382994_C_A     | 31382994 | 1.5 | 1.1 | 2.0 | 0.022233 | 0.18 | 0.19 | 0.18 | SNP       |
| chr6_31592820_C_T     | 31592820 | 0.5 | 0.5 | 0.5 | 0.022304 | 0.11 | 0.12 | 0.34 | SNP       |
| chr6_30515043_T_C     | 30515043 | 1.8 | 1.1 | 3.1 | 0.022309 | 0.11 | 0.12 | 0.11 | SNP       |
| chr6_29893139_G_A     | 29893139 | 1.4 | 1.0 | 2.0 | 0.022318 | 0.21 | 0.24 | 0.21 | SNP       |
| chr6_29911019_T_C     | 29911019 | 0.7 | 0.5 | 1.0 | 0.022587 | 0.45 | 0.43 | 0.45 | SNP       |
| chr6_33971708_G_A     | 33971708 | 0.7 | 0.5 | 0.9 | 0.022589 | 0.20 | 0.14 | 0.20 | SNP       |
| chr6_32333827_A_C     | 32333827 | 2.2 | 1.1 | 4.5 | 0.022953 | 0.13 | 0.12 | 0.13 | SNP       |
| chr6_33036630_G_T     | 33036630 | 0.6 | 0.4 | 0.9 | 0.022981 | 0.15 | 0.09 | 0.15 | SNP       |
| chr6_33036631_A_C     | 33036631 | 0.6 | 0.4 | 0.9 | 0.022981 | 0.15 | 0.09 | 0.15 | SNP       |
| chr6_29911686_C_T     | 29911686 | 1.5 | 1.1 | 2.1 | 0.023070 | 0.19 | 0.23 | 0.18 | SNP       |
| chr6_33036388_C_T     | 33036388 | 0.6 | 0.4 | 0.9 | 0.023232 | 0.14 | 0.09 | 0.15 | SNP       |
| chr6_32731313_T_A     | 32731313 | 0.6 | 0.4 | 0.9 | 0.023241 | 0.21 | 0.14 | 0.21 | SNP       |
| chr6_29911037_G_C     | 29911037 | 0.7 | 0.5 | 1.0 | 0.023243 | 0.45 | 0.44 | 0.45 | SNP       |
| chr6_29913881_T_C     | 29913881 | 0.7 | 0.6 | 1.0 | 0.023308 | 0.40 | 0.40 | 0.40 | SNP       |
| chr6_29896852_C_T     | 29896852 | 1.4 | 1.0 | 2.0 | 0.023432 | 0.25 | 0.28 | 0.24 | SNP       |
| chr6_31556581_T_A     | 31556581 | 0.7 | 0.5 | 0.9 | 0.023492 | 0.24 | 0.22 | 0.24 | SNP       |
| chr6_29712878_G_A     | 29712878 | 2.2 | 1.1 | 4.2 | 0.023511 | 0.02 | 0.05 | 0.02 | SNP       |
| chr6_31542476_G_A     | 31542476 | 0.7 | 0.5 | 0.9 | 0.023565 | 0.16 | 0.15 | 0.16 | SNP       |
| chr6_32797537_T_G     | 32797537 | 0.7 | 0.5 | 0.9 | 0.023717 | 0.35 | 0.24 | 0.36 | SNP       |
| chr6_33033266_T_A     | 33033266 | 0.6 | 0.4 | 0.9 | 0.023751 | 0.14 | 0.09 | 0.15 | SNP       |
| chr6_31795345_G_A     | 31795345 | 0.7 | 0.5 | 1.0 | 0.023759 | 0.15 | 0.15 | 0.15 | SNP       |
| chr6_31475127_G_A     | 31475127 | 1.5 | 1.0 | 2.1 | 0.023949 | 0.28 | 0.31 | 0.28 | SNP       |
| chr6_33037579_A_T     | 33037579 | 0.6 | 0.4 | 0.9 | 0.024077 | 0.14 | 0.09 | 0.15 | SNP       |
| chr6_33037580_T_G     | 33037580 | 0.6 | 0.4 | 0.9 | 0.024077 | 0.14 | 0.09 | 0.15 | SNP       |
| chr6_29892233_T_C     | 29892233 | 1.4 | 1.0 | 1.9 | 0.024125 | 0.25 | 0.28 | 0.25 | SNP       |
| chr6_32193449_T_C     | 32193449 | 0.7 | 0.5 | 0.9 | 0.024156 | 0.16 | 0.13 | 0.17 | SNP       |
| chr6_33386728_G_C     | 33386728 | 1.9 | 1.1 | 3.4 | 0.024162 | 0.03 | 0.05 | 0.03 | SNP       |
| chr6_32633285_T_C     | 32633285 | 0.7 | 0.5 | 0.9 | 0.024186 | 0.36 | 0.28 | 0.37 | SNP       |
| chr6_29907861_T_G     | 29907861 | 1.0 | 1.0 | 1.0 | 0.024211 | 1.49 | 0.21 | 0.18 | SNP       |
| chr6_32723715_C_A     | 32723715 | 1.5 | 1.0 | 2.1 | 0.024547 | 0.09 | 0.13 | 0.09 | SNP       |
| chr6_31506648_T_G     | 31506648 | 1.4 | 1.0 | 2.0 | 0.024714 | 0.31 | 0.34 | 0.31 | SNP       |
| chr6_31239681_T_A     | 31239681 | 1.5 | 1.1 | 2.2 | 0.024761 | 0.40 | 0.43 | 0.40 | SNP       |
| chr6_32363816_T_G     | 32363816 | 1.4 | 1.0 | 1.9 | 0.024913 | 0.43 | 0.52 | 0.42 | SNP       |
| chr6_33033267_G_A     | 33033267 | 0.6 | 0.4 | 0.9 | 0.025147 | 0.14 | 0.09 | 0.15 | SNP       |
| chr6_33035986_T_C     | 33035986 | 0.6 | 0.4 | 0.9 | 0.025288 | 0.13 | 0.08 | 0.13 | SNP       |
| chr6_34477013_T_G     | 34477013 | 0.6 | 0.4 | 0.9 | 0.025418 | 0.11 | 0.08 | 0.11 | SNP       |
| chr6_29913430_C_T     | 29913430 | 1.5 | 1.0 | 2.1 | 0.025583 | 0.18 | 0.20 | 0.18 | SNP       |
| chr6_31605199_G_C     | 31605199 | 0.7 | 0.5 | 1.0 | 0.025653 | 0.44 | 0.43 | 0.44 | SNP       |
| chr6_31930351_A_G     | 31930351 | 0.4 | 0.2 | 0.8 | 0.025690 | 0.05 | 0.02 | 0.05 | SNP       |
| chr6_32169621_T_A     | 32169621 | 0.7 | 0.6 | 1.0 | 0.025742 | 0.48 | 0.43 | 0.48 | SNP       |
| chr6_31836827_T_G     | 31836827 | 1.6 | 1.1 | 2.3 | 0.025760 | 0.33 | 0.32 | 0.33 | SNP       |
| chr6_32633502_T_C     | 32633502 | 0.6 | 0.4 | 0.9 | 0.025791 | 0.13 | 0.11 | 0.13 | SNP       |
| chr6_31464321_T_A     | 31464321 | 0.7 | 0.5 | 1.0 | 0.025824 | 0.30 | 0.24 | 0.30 | SNP       |
| chr6_29909071_T_G     | 29909071 | 1.5 | 1.0 | 2.1 | 0.025951 | 0.19 | 0.20 | 0.18 | SNP       |
| chr6_32184345_T_C     | 32184345 | 0.7 | 0.4 | 0.9 | 0.026014 | 0.13 | 0.11 | 0.14 | SNP       |
| chr6_32184574_G_A     | 32184574 | 0.7 | 0.4 | 0.9 | 0.026014 | 0.13 | 0.11 | 0.14 | SNP       |
| chr6_33553239_C_T     | 33553239 | 2.6 | 1.0 | 5.6 | 0.026085 | 0.01 | 0.02 | 0.01 | SNP       |
| chr6_33045659_T_C     | 33045659 | 0.4 | 0.1 | 0.6 | 0.026092 | 0.04 | 0.02 | 0.04 | SNP       |
| chr6_32295952_G_A     | 32295952 | 0.7 | 0.5 | 0.9 | 0.026119 | 0.31 | 0.24 | 0.32 | SNP       |
| chr6_32796521_C_T     | 32796521 | 0.7 | 0.5 | 0.9 | 0.026134 | 0.22 | 0.15 | 0.23 | SNP       |
| chr6_29892203_T_A     | 29892203 | 1.4 | 1.0 | 1.9 | 0.026138 | 0.25 | 0.28 | 0.24 | SNP       |
| chr6_33036501_G_A     | 33036501 | 0.6 | 0.4 | 0.9 | 0.026201 | 0.15 | 0.09 | 0.15 | SNP       |
| chr6_32439964_T_G     | 32439964 | 0.7 | 0.5 | 1.0 | 0.026262 | 0.38 | 0.29 | 0.38 | SNP       |
| chr6_32559380_G_A     | 32559380 | 0.7 | 0.5 | 1.0 | 0.026314 | 0.49 | 0.43 | 0.50 | SNP       |
| chr6_29895701_T_C     | 29895701 | 1.4 | 1.0 | 1.9 | 0.026624 | 0.21 | 0.24 | 0.21 | SNP       |
| chr6_31323353_G_A     | 31323353 | 0.7 | 0.6 | 1.0 | 0.026659 | 0.36 | 0.35 | 0.36 | SNP       |
| chr6_29909070_T_C     | 29909070 | 0.8 | 0.6 | 1.0 | 0.026761 | 0.45 | 0.45 | 0.45 | SNP       |
| chr6_29795657_G_A     | 29795657 | 1.4 | 1.0 | 1.9 | 0.026771 | 0.39 | 0.42 | 0.39 | SNP       |
| chr6_29945949_G_A     | 29945949 | 1.7 | 1.1 | 2.7 | 0.026920 | 0.11 | 0.12 | 0.11 | SNP       |
| HLA_2field_DP81_02_04 | 32672744 | 0.4 | 0.2 | 0.8 | 0.026952 | 0.05 | 0.02 | 0.05 | HLA (HLA) |
| chr6_31322996_C_T     | 31322996 | 0.7 | 0.6 | 1.0 | 0.027066 | 0.38 | 0.33 | 0.38 | SNP       |
| chr6_33260353_A_G     | 33260353 | 2.0 | 1.0 | 3.5 | 0.027068 | 0.03 | 0.05 | 0.03 | SNP       |
| HLA_2field_A_02_01    | 29910309 | 0.7 | 0.6 | 1.0 | 0.027390 | 0.35 | 0.36 | 0.35 | HLA (HLA) |
| chr6_31837250_G_A     | 31837250 | 1.4 | 1.0 | 1.9 | 0.027391 | 0.49 | 0.49 | 0.49 | SNP       |
| chr6_31238708_G_A     | 31238708 | 0.6 | 0.4 | 0.9 | 0.027398 | 0.09 | 0.07 | 0.10 | SNP       |
| chr6_32083300_G_A     | 32083300 | 0.6 | 0.4 | 0.9 | 0.027522 | 0.15 | 0.10 | 0.16 | SNP       |
| chr6_33033390_A_C     | 33033390 | 0.4 | 0.3 | 0.6 | 0.027570 | 0.15 | 0.09 | 0.15 | SNP       |
| chr6_33033235_C_T     | 33033235 | 0.6 | 0.4 | 0.9 | 0.027744 | 0.15 | 0.09 | 0.15 | SNP       |
| chr6_32377116_C_G     | 32377116 | 1.5 | 1.0 | 2.1 | 0.027922 | 0.48 | 0.56 | 0.47 | SNP       |
| chr6_29911198_T_C     | 29911198 | 0.7 | 0.5 | 1.0 | 0.027999 | 0.41 | 0.41 | 0.41 | SNP       |
| chr6_29912796_G_A     | 29912796 | 0.4 | 0.1 | 0.6 | 0.028011 | 0.41 | 0.41 | 0.41 | SNP       |
| chr6_31322303_G_C     | 31322303 | 0.7 | 0.6 | 1.0 | 0.028046 | 0.34 | 0.30 | 0.35 | SNP       |
| chr6_32797684_G_A     | 32797684 | 0.7 | 0.5 | 1.0 | 0.028094 | 0.36 | 0.26 | 0.37 | SNP       |
| chr6_33382943_T_G     | 33382943 | 0.6 | 0.3 | 0.9 | 0.028218 | 0.09 | 0.06 | 0.09 | SNP       |
| chr6_32711050_C_T     | 32711050 | 0.7 | 0.6 | 1.0 | 0.028583 | 0.21 | 0.14 | 0.21 | SNP       |
| chr6_31839309_T_C     | 31839309 | 1.4 | 1.0 | 1.9 | 0.028690 | 0.50 | 0.50 | 0.50 | SNP       |
| chr6_31320263_C_T     | 31320263 | 0.6 | 0.4 | 0.9 | 0.028724 | 0.10 | 0.08 | 0.11 | SNP       |
| chr6_31891923_G_A     | 31891923 | 0.3 | 0.1 | 0.8 | 0.029107 | 0.04 | 0.01 | 0.04 | SNP       |
| chr6_31131667_G_A     | 31131667 | 1.4 | 1.0 | 1.9 | 0.029245 | 0.04 | 0.01 | 0.04 | SNP       |
| chr6_29913135_G_C     | 29913135 | 0.8 | 0.6 | 1.0 | 0.029249 | 0.41 | 0.41 | 0.41 | SNP       |
| chr6_29913639_G_A     | 29913639 | 1.5 | 1.0 | 2.1 | 0.029285 | 0.19 | 0.20 | 0.18 | SNP       |
| chr6_29909021_G_C     | 29909021 | 1.6 | 1.0 | 2.4 | 0.029286 | 0.13 | 0.15 | 0.13 | SNP       |
| chr6_32436514_G_A     | 32436514 | 0.7 | 0.5 | 1.0 | 0.029509 | 0.18 | 0.15 | 0.18 | SNP       |
| chr6_32557301_T_C     | 32557301 | 0.4 | 0.1 | 0.8 | 0.029577 | 0.04 | 0.02 | 0.04 | SNP       |
| chr6_32521796_A_C     | 32521796 | 0.7 | 0.5 | 1.0 | 0.029583 | 0.29 | 0.21 | 0.30 | SNP       |
| chr6_31238522_C_T     | 31238522 | 0.7 | 0.5 | 1.0 | 0.029739 | 0.20 | 0.16 | 0.20 | SNP       |
| chr6_29914011_T_G     | 29914011 | 1.5 | 1.0 | 2.1 | 0.029744 | 0.40 | 0.40 | 0.40 | SNP       |
| chr6_33036177_A_G     | 33036177 | 0.6 | 0.4 | 0.9 | 0.029772 | 0.15 | 0.09 | 0.15 | SNP       |
| chr6_32171683_T_C     | 32171683 | 0.7 | 0.6 | 1.0 | 0.029793 | 0.47 | 0.43 | 0.47 | SNP       |
| chr6_29913734_C_T     | 29913734 | 0.8 | 0.6 | 1.0 | 0.029918 | 0.40 | 0.41 | 0.40 | SNP       |
| chr6_33037866_A_G     | 33037866 | 0.6 | 0.4 | 0.9 | 0.029922 | 0.14 | 0.09 | 0.14 | SNP       |
| chr6_32713867_C_T     | 32713867 | 0.6 | 0.4 | 0.9 | 0.030208 | 0.20 | 0.14 | 0.20 | SNP       |
| chr6_33039484_G_A     | 33039484 | 0.6 | 0.4 | 0.9 | 0.030651 | 0.14 | 0.09 | 0.15 | SNP       |
| chr6_29797615_A_C     | 29797615 | 1.4 | 1.0 | 1.9 | 0.030748 | 0.43 | 0.46 | 0.43 | SNP       |
| chr6_31635710_T_C     | 31635710 | 1.4 | 1.0 | 1.8 | 0.030803 | 0.20 | 0.24 | 0.20 | SNP       |
| chr6_29909924_G_A     | 29909924 | 0.8 | 0.6 | 1.0 | 0.031011 | 0.45 | 0.45 | 0.45 | SNP       |
| chr6_32634992_T_C     | 32634992 | 0.7 | 0.4 | 1.0 | 0.031246 | 0.13 | 0.11 | 0.13 | SNP       |
| chr6_33377061_C_T     | 33377061 | 1.4 | 1.0 | 2.0 | 0.031299 | 0.48 | 0.57 | 0.47 | SNP       |
| chr6_29910725_C_G     | 29910725 | 1.6 | 1.0 | 2.5 | 0.031300 | 0.10 | 0.13 | 0.09 | SNP       |
| chr6_31602967_G_A     | 31602967 | 1.4 | 1.0 | 1.8 | 0.031551 | 0.37 | 0.39 | 0.37 | SNP       |
| chr6_32629497_A_G     | 32629497 | 0.7 | 0.4 | 1.0 | 0.031898 | 0.13 | 0.11 | 0.13 | SNP       |
| chr6_32780914_G_A     | 32780914 | 0.6 | 0.3 | 0.9 | 0.032012 | 0.10 | 0.06 | 0.10 | SNP       |
| chr6_32559371_T_C     | 32559371 | 0.7 | 0.5 | 1.0 | 0.032012 | 0.49 | 0.43 | 0.50 | SNP       |
| chr6_32634074_C_T     | 32634074 | 0.7 | 0.4 | 1.0 | 0.032106 | 0.13 | 0.11 | 0.13 | SNP       |
| chr6_32633640_T_A     | 32633640 | 0.7 | 0.4 | 1.0 | 0.032235 | 0.13 | 0.11 | 0.13 | SNP       |
| chr6_33033646_C_T     | 33033646 | 0.7 | 0.4 | 1.0 | 0.032235 | 0.13 | 0.11 | 0.13 | SNP       |
| chr6_31084435_G_A     | 31084435 | 0.7 | 0.5 | 1.0 | 0.032356 | 0.32 | 0.31 | 0.32 | SNP       |
| chr6_32633281_C_T     | 32633281 | 0.7 | 0.4 | 1.0 | 0.032374 | 0.13 | 0.11 | 0.13 | SNP       |
| chr6_31239430_C_T     | 31239430 | 0.7 | 0.5 | 1.0 | 0.032479 | 0.48 | 0.47 | 0.48 | SNP       |
| chr6_32150296_C_A     | 32150296 | 0.5 | 0.2 | 0.9 | 0.032559 | 0.06 | 0.03 | 0.07 | SNP       |
| chr6_32609594_G_A     | 32609594 | 2.1 | 1.0 | 4.0 | 0.032611 | 0.13 | 0.15 | 0.13 | SNP       |
| chr6_32550587_T_G     | 32550587 | 0.4 | 0.2 | 0.9 | 0.032690 | 0.05 | 0.02 | 0.05 | SNP       |
| chr6_29913817_C_T     | 29913817 | 0.8 | 0.6 | 1.0 | 0.032691 | 0.40 | 0.41 | 0.40 | SNP       |
| chr6_32052444_C_T     | 32052444 | 0.4 | 0.2 | 0.9 | 0.032848 | 0.04 | 0.02 | 0.04 | SN        |



|                      |           |     |     |     |          |      |      |      |            |
|----------------------|-----------|-----|-----|-----|----------|------|------|------|------------|
| chr6_29908469_T_C    | 29908469  | 0.8 | 0.6 | 1.0 | 0.035012 | 0.41 | 0.41 | 0.41 | SNP        |
| chr6_29691090_T_A    | 29691090  | 0.6 | 0.6 | 1.0 | 0.035149 | 0.47 | 0.46 | 0.47 | SNP        |
| chr6_30524614_A_G    | 30524614  | 2.1 | 1.0 | 4.2 | 0.035178 | 0.02 | 0.04 | 0.02 | SNP        |
| chr6_32797115_T_G    | 32797115  | 0.7 | 0.5 | 1.0 | 0.035412 | 0.30 | 0.25 | 0.30 | SNP        |
| chr6_33037104_C_T    | 33037104  | 0.6 | 0.4 | 1.0 | 0.035486 | 0.14 | 0.09 | 0.15 | SNP        |
| chr6_33026490_T_C    | 33026490  | 0.8 | 0.6 | 1.0 | 0.035507 | 0.45 | 0.39 | 0.46 | SNP        |
| chr6_29891850_A_G    | 29891850  | 1.3 | 1.0 | 1.7 | 0.035518 | 0.42 | 0.43 | 0.42 | SNP        |
| chr6_33036287_G_A    | 33036287  | 0.7 | 0.4 | 1.0 | 0.035520 | 0.15 | 0.10 | 0.15 | SNP        |
| chr6_32944746_G_A    | 32944746  | 1.3 | 1.0 | 1.7 | 0.035590 | 0.42 | 0.50 | 0.42 | SNP        |
| chr6_33036316_A_G    | 33036316  | 0.7 | 0.4 | 1.0 | 0.035596 | 0.15 | 0.10 | 0.15 | SNP        |
| chr6_31620020_A_G    | 31620020  | 1.4 | 1.0 | 1.9 | 0.035905 | 0.38 | 0.41 | 0.38 | SNP        |
| chr6_32633462_T_A    | 32633462  | 0.7 | 0.4 | 1.0 | 0.035997 | 0.13 | 0.11 | 0.13 | SNP        |
| chr6_33036288_G_A    | 33036288  | 0.7 | 0.4 | 1.0 | 0.036112 | 0.15 | 0.10 | 0.15 | SNP        |
| chr6_31325947_A_C    | 31325947  | 1.4 | 1.0 | 2.0 | 0.036300 | 0.14 | 0.16 | 0.14 | SNP        |
| chr6_29796257_C_T    | 29796257  | 1.4 | 1.0 | 1.9 | 0.036345 | 0.44 | 0.48 | 0.44 | SNP        |
| chr6_29940202_G_A    | 29940202  | 1.4 | 1.0 | 1.9 | 0.036580 | 0.27 | 0.28 | 0.27 | SNP        |
| chr6_31903545_A_G    | 31903545  | 0.5 | 0.2 | 0.9 | 0.036738 | 0.06 | 0.02 | 0.06 | SNP        |
| chr6_33036233_A_G    | 33036233  | 0.7 | 0.4 | 1.0 | 0.036787 | 0.15 | 0.10 | 0.15 | SNP        |
| chr6_29895913_G_A    | 29895913  | 0.8 | 0.6 | 1.0 | 0.037030 | 0.45 | 0.45 | 0.45 | SNP        |
| chr6_31322133_A_G    | 31322133  | 0.7 | 0.6 | 1.0 | 0.037335 | 0.35 | 0.31 | 0.35 | SNP        |
| chr6_33033202_C_T    | 33033202  | 0.7 | 0.4 | 1.0 | 0.037340 | 0.15 | 0.10 | 0.15 | SNP        |
| chr6_31322402_C_T    | 31322402  | 1.3 | 1.0 | 1.8 | 0.037583 | 0.34 | 0.37 | 0.34 | SNP        |
| chr6_32797109_G_A    | 32797109  | 0.7 | 0.5 | 1.0 | 0.037602 | 0.22 | 0.15 | 0.23 | SNP        |
| chr6_33033388_A_C    | 33033388  | 0.6 | 0.4 | 1.0 | 0.037932 | 0.15 | 0.09 | 0.15 | SNP        |
| chr6_33037294_T_C    | 33037294  | 0.6 | 0.4 | 1.0 | 0.038268 | 0.14 | 0.09 | 0.15 | SNP        |
| chr6_29908967_G_A    | 29908967  | 0.8 | 0.6 | 1.0 | 0.038148 | 0.41 | 0.41 | 0.41 | SNP        |
| chr6_31902289_C_G    | 31902289  | 0.5 | 0.2 | 0.9 | 0.038176 | 0.06 | 0.02 | 0.06 | SNP        |
| chr6_31510105_G_A    | 31510105  | 1.4 | 1.0 | 2.0 | 0.038253 | 0.31 | 0.34 | 0.31 | SNP        |
| chr6_33036242_T_C    | 33036242  | 0.7 | 0.4 | 1.0 | 0.038260 | 0.15 | 0.10 | 0.15 | SNP        |
| chr6_32628939_C_G    | 32628939  | 0.7 | 0.4 | 1.0 | 0.038489 | 0.13 | 0.11 | 0.13 | SNP        |
| chr6_33037522_T_C    | 33037522  | 0.7 | 0.4 | 1.0 | 0.038561 | 0.15 | 0.10 | 0.15 | SNP        |
| chr6_31509372_A_G    | 31509372  | 1.4 | 1.0 | 2.0 | 0.038648 | 0.33 | 0.36 | 0.32 | SNP        |
| chr6_32605935_G_T    | 32605935  | 1.9 | 1.0 | 3.6 | 0.038699 | 1.9  | 1.2  | 1.2  | SNP        |
| chr6_31601520_T_C    | 31601520  | 1.4 | 1.0 | 1.9 | 0.038729 | 0.19 | 0.22 | 0.18 | SNP        |
| chr6_33037865_C_T    | 33037865  | 0.6 | 0.4 | 1.0 | 0.038771 | 0.14 | 0.09 | 0.14 | SNP        |
| chr6_33033146_T_C    | 33033146  | 0.7 | 0.4 | 1.0 | 0.038760 | 0.15 | 0.10 | 0.15 | SNP        |
| chr6_31903121_G_A    | 31903121  | 0.5 | 0.2 | 0.9 | 0.038995 | 0.06 | 0.02 | 0.06 | SNP        |
| chr6_29912463_G_A    | 29912463  | 1.3 | 1.0 | 1.7 | 0.039163 | 0.49 | 0.49 | 0.49 | SNP        |
| chr6_31240959_C_G    | 31240959  | 0.7 | 0.5 | 1.0 | 0.039205 | 0.23 | 0.19 | 0.23 | SNP        |
| chr6_32375347_T_G    | 32375347  | 0.4 | 0.1 | 0.9 | 0.039208 | 0.04 | 0.02 | 0.04 | SNP        |
| chr6_32304466_G_A    | 32304466  | 0.4 | 0.1 | 0.9 | 0.039299 | 0.04 | 0.02 | 0.05 | SNP        |
| chr6_29910402_G_A    | 29910402  | 1.5 | 1.0 | 2.3 | 0.039410 | 0.09 | 0.13 | 0.09 | SNP        |
| chr6_32639955_T_C    | 32639955  | 1.4 | 1.0 | 1.8 | 0.039442 | 0.43 | 0.52 | 0.43 | SNP        |
| chr6_33049981_A_G    | 33049981  | 0.7 | 0.5 | 1.0 | 0.039492 | 0.21 | 0.17 | 0.21 | SNP        |
| chr6_33037557_C_T    | 33037557  | 0.6 | 0.4 | 1.0 | 0.039935 | 0.11 | 0.06 | 0.11 | SNP        |
| chr6_32635164_T_C    | 32635164  | 0.7 | 0.6 | 1.0 | 0.040040 | 0.45 | 0.37 | 0.46 | SNP        |
| chr6_32604221_A_G    | 32604221  | 1.9 | 1.0 | 3.6 | 0.040108 | 0.13 | 0.12 | 0.13 | SNP        |
| chr6_32707023_T_C    | 32707023  | 0.6 | 0.4 | 1.0 | 0.040243 | 0.21 | 0.14 | 0.22 | SNP        |
| chr6_32785275_G_A    | 32785275  | 0.6 | 0.4 | 1.0 | 0.040464 | 0.10 | 0.06 | 0.10 | SNP        |
| chr6_32605884_C_T    | 32605884  | 1.9 | 1.0 | 3.6 | 0.040690 | 0.12 | 0.12 | 0.12 | SNP        |
| chr6_32007063_C_T    | 32007063  | 0.7 | 0.4 | 1.0 | 0.040792 | 0.27 | 0.20 | 0.27 | SNP        |
| chr6_31628912_C_T    | 31628912  | 0.7 | 0.5 | 1.0 | 0.040929 | 0.13 | 0.11 | 0.13 | SNP        |
| chr6_29909044_G_C    | 29909044  | 0.8 | 0.6 | 1.0 | 0.040959 | 0.41 | 0.41 | 0.40 | SNP        |
| chr6_32628722_A_T    | 32628722  | 0.7 | 0.5 | 1.0 | 0.041073 | 0.13 | 0.11 | 0.13 | SNP        |
| chr6_32635001_T_C    | 32635001  | 0.7 | 0.5 | 1.0 | 0.041377 | 0.13 | 0.11 | 0.13 | SNP        |
| chr6_31240432_A_G    | 31240432  | 0.7 | 0.4 | 1.0 | 0.041402 | 0.47 | 0.48 | 0.47 | SNP        |
| chr6_33033170_T_C    | 33033170  | 0.7 | 0.4 | 1.0 | 0.041599 | 0.14 | 0.10 | 0.15 | SNP        |
| chr6_33033058_T_C    | 33033058  | 0.7 | 0.4 | 1.0 | 0.041987 | 0.14 | 0.10 | 0.15 | SNP        |
| chr6_33036210_G_T    | 33036210  | 0.7 | 0.4 | 1.0 | 0.042050 | 0.14 | 0.10 | 0.15 | SNP        |
| chr6_29713155_G_A    | 29713155  | 1.5 | 1.0 | 2.2 | 0.042062 | 0.09 | 0.12 | 0.09 | SNP        |
| chr6_31925921_G_A    | 31925921  | 0.4 | 0.2 | 0.9 | 0.042240 | 0.04 | 0.02 | 0.04 | SNP        |
| chr6_33037080_G_A    | 33037080  | 0.7 | 0.4 | 1.0 | 0.042260 | 0.14 | 0.09 | 0.15 | SNP        |
| chr6_33037082_A_G    | 33037082  | 0.7 | 0.4 | 1.0 | 0.042260 | 0.14 | 0.09 | 0.15 | SNP        |
| chr6_32946133_T_C    | 32946133  | 1.3 | 1.0 | 1.7 | 0.042266 | 0.42 | 0.50 | 0.41 | SNP        |
| chr6_33033188_C_T    | 33033188  | 0.7 | 0.4 | 1.0 | 0.042487 | 0.14 | 0.10 | 0.15 | SNP        |
| chr6_33239905_C_A    | 33239905  | 0.4 | 0.1 | 0.9 | 0.042621 | 0.04 | 0.02 | 0.05 | SNP        |
| chr6_33547430_G_A    | 33547430  | 0.7 | 0.5 | 1.0 | 0.042621 | 0.18 | 0.15 | 0.18 | SNP        |
| chr6_31373174_T_C    | 31373174  | 0.7 | 0.6 | 1.0 | 0.042708 | 0.36 | 0.34 | 0.36 | SNP        |
| chr6_31930063_G_A    | 31930063  | 1.7 | 1.0 | 2.8 | 0.042733 | 0.04 | 0.06 | 0.04 | SNP        |
| chr6_32006337_C_G    | 32006337  | 0.7 | 0.5 | 1.0 | 0.042800 | 0.34 | 0.28 | 0.34 | SNP        |
| chr6_330333948_C_A   | 330333948 | 0.7 | 0.5 | 1.0 | 0.042840 | 0.13 | 0.11 | 0.13 | SNP        |
| chr6_32605266_G_C    | 32605266  | 0.6 | 0.3 | 0.9 | 0.042845 | 0.07 | 0.04 | 0.08 | SNP        |
| chr6_33476718_T_C    | 33476718  | 0.8 | 0.6 | 1.0 | 0.042871 | 0.35 | 0.30 | 0.36 | SNP        |
| chr6_32628997_C_T    | 32628997  | 0.7 | 0.5 | 1.0 | 0.043119 | 0.13 | 0.12 | 0.14 | SNP        |
| chr6_31378540_A_G    | 31378540  | 1.9 | 1.0 | 2.5 | 0.043129 | 0.08 | 0.09 | 0.07 | SNP        |
| chr6_29908659_T_C    | 29908659  | 0.8 | 0.6 | 1.0 | 0.043145 | 0.43 | 0.43 | 0.43 | SNP        |
| chr6_32633854_A_G    | 32633854  | 0.7 | 0.5 | 1.0 | 0.043163 | 0.13 | 0.11 | 0.13 | SNP        |
| chr6_33033178_G_A    | 33033178  | 0.7 | 0.4 | 1.0 | 0.043203 | 0.14 | 0.10 | 0.15 | SNP        |
| chr6_33045896_A_G    | 33045896  | 0.4 | 0.1 | 0.9 | 0.043259 | 0.04 | 0.02 | 0.04 | SNP        |
| chr6_33037419_G_A    | 33037419  | 0.6 | 0.4 | 1.0 | 0.043653 | 0.14 | 0.09 | 0.14 | SNP        |
| chr6_32408012_G_A    | 32408012  | 0.7 | 0.5 | 1.0 | 0.043681 | 0.33 | 0.24 | 0.34 | SNP        |
| chr6_33033177_G_A    | 33033177  | 0.7 | 0.4 | 1.0 | 0.043708 | 0.14 | 0.10 | 0.15 | SNP        |
| chr6_31509355_A_G    | 31509355  | 1.4 | 1.0 | 1.9 | 0.043763 | 1.4  | 0.33 | 0.33 | SNP        |
| chr6_31932209_G_A    | 31932209  | 0.3 | 0.1 | 0.8 | 0.043778 | 0.04 | 0.01 | 0.04 | SNP        |
| HLA_2foid_DRB1_11_01 | 32546552  | 0.4 | 0.1 | 0.9 | 0.043804 | 0.04 | 0.02 | 0.04 | HLA (xHLA) |
| chr6_33045891_C_T    | 33045891  | 0.4 | 0.1 | 0.9 | 0.043864 | 0.04 | 0.02 | 0.04 | SNP        |
| chr6_32340596_T_A    | 32340596  | 0.4 | 0.2 | 0.9 | 0.044196 | 0.05 | 0.02 | 0.05 | SNP        |
| chr6_32781121_G_C    | 32781121  | 0.6 | 0.4 | 1.0 | 0.044252 | 0.10 | 0.06 | 0.10 | SNP        |
| chr6_32796967_G_A    | 32796967  | 0.7 | 0.5 | 1.0 | 0.044365 | 0.23 | 0.15 | 0.24 | SNP        |
| chr6_31709814_G_C    | 31709814  | 0.6 | 0.3 | 1.0 | 0.044375 | 0.06 | 0.07 | 0.06 | SNP        |
| chr6_32076499_G_A    | 32076499  | 1.7 | 0.5 | 1.0 | 0.044480 | 0.36 | 0.36 | 0.36 | SNP        |
| chr6_30229306_A_G    | 30229306  | 1.4 | 1.0 | 1.8 | 0.044585 | 0.32 | 0.33 | 0.32 | SNP        |
| chr6_32629425_G_A    | 32629425  | 0.7 | 0.5 | 1.0 | 0.044606 | 0.13 | 0.11 | 0.13 | SNP        |
| chr6_33038222_G_A    | 33038222  | 0.7 | 0.4 | 1.0 | 0.044631 | 0.14 | 0.09 | 0.15 | SNP        |
| chr6_29908426_C_T    | 29908426  | 0.8 | 0.6 | 1.0 | 0.044782 | 0.41 | 0.41 | 0.41 | SNP        |
| chr6_33037424_T_C    | 33037424  | 0.7 | 0.4 | 1.0 | 0.044813 | 0.14 | 0.09 | 0.14 | SNP        |
| chr6_31322459_T_C    | 31322459  | 1.3 | 1.0 | 1.7 | 0.044834 | 0.35 | 0.37 | 0.34 | SNP        |
| chr6_32192331_L_G_A  | 32192331  | 1.3 | 1.0 | 1.8 | 0.044957 | 0.47 | 0.56 | 0.46 | SNP        |
| chr6_30880156_G_A    | 30880156  | 1.8 | 1.0 | 3.1 | 0.044963 | 0.03 | 0.06 | 0.03 | SNP        |
| chr6_32063896_G_A    | 32063896  | 0.3 | 0.1 | 0.8 | 0.045295 | 0.04 | 0.01 | 0.04 | SNP        |
| chr6_31322047_A_G    | 31322047  | 0.7 | 0.5 | 1.0 | 0.045382 | 0.15 | 0.15 | 0.16 | SNP        |
| chr6_31558978_G_C    | 31558978  | 0.7 | 0.5 | 1.0 | 0.045739 | 0.14 | 0.14 | 0.14 | SNP        |
| chr6_32634765_T_C    | 32634765  | 0.7 | 0.5 | 1.0 | 0.045788 | 0.13 | 0.12 | 0.13 | SNP        |
| chr6_33037187_C_G    | 33037187  | 0.7 | 0.4 | 1.0 | 0.045790 | 0.15 | 0.10 | 0.15 | SNP        |
| chr6_31539767_C_T    | 31539767  | 0.7 | 0.5 | 1.0 | 0.046499 | 0.15 | 0.15 | 0.15 | SNP        |
| chr6_31321681_C_T    | 31321681  | 0.7 | 0.5 | 1.0 | 0.046654 | 0.20 | 0.22 | 0.20 | SNP        |
| chr6_31509967_G_T    | 31509967  | 0.7 | 0.5 | 1.0 | 0.046817 | 0.16 | 0.16 | 0.16 | SNP        |
| chr6_32785284_T_C    | 32785284  | 0.6 | 0.4 | 1.0 | 0.047211 | 0.10 | 0.06 | 0.10 | SNP        |
| chr6_29944670_G_C    | 29944670  | 1.3 | 1.0 | 1.8 | 0.047420 | 0.46 | 0.46 | 0.46 | SNP        |
| chr6_32709965_G_T    | 32709965  | 0.6 | 0.4 | 1.0 | 0.047542 | 0.20 | 0.14 | 0.21 | SNP        |
| chr6_31326027_A_C    | 31326027  | 1.4 | 1.0 | 1.9 | 0.047592 | 0.14 | 0.16 | 0.14 | SNP        |
| chr6_32629613_C_G    | 32629613  | 0.7 | 0.5 | 1.0 | 0.047821 | 0.13 | 0.11 | 0.13 | SNP        |
| chr6_32629618_G_A    | 32629618  | 0.7 | 0.5 | 1.0 | 0.047821 | 0.13 | 0.11 | 0.13 | SNP        |
| chr6_31322688_T_C    | 31322688  | 1.3 | 1.0 | 1.7 | 0.047874 | 0.35 | 0.37 | 0.34 | SNP        |



Supplementary Table 5. Association analysis of patients with MPA versus controls, adjusting for sex and genetic structure (principal components 1-4).

Table with columns: Variant, position, OR, CI lower, CI upper, p, MAF, MAF cases, MAF controls, Type (SNP, HLA (HLA)). The table lists numerous genetic variants and their associated statistics.

|                   |           |     |     |     |          |      |      |      |           |
|-------------------|-----------|-----|-----|-----|----------|------|------|------|-----------|
| chr6_32558045_T_C | 32558045  | 0.5 | 0.4 | 0.7 | 5.83E-05 | 0.43 | 0.30 | 0.44 | SNP       |
| chr6_32558019_C_A | 32558019  | 2.0 | 1.4 | 2.9 | 5.87E-05 | 0.28 | 0.44 | 0.27 | SNP       |
| chr6_32634506_C_T | 32634506  | 1.9 | 1.4 | 2.7 | 5.91E-05 | 0.24 | 0.38 | 0.23 | SNP       |
| chr6_32634646_T_C | 32634646  | 1.9 | 1.4 | 2.7 | 6.01E-05 | 0.24 | 0.38 | 0.22 | SNP       |
| chr6_32604538_G_A | 32604538  | 2.0 | 1.5 | 2.7 | 6.03E-05 | 0.22 | 0.47 | 0.31 | SNP       |
| chr6_32634137_A_C | 32634137  | 1.9 | 1.4 | 2.7 | 6.13E-05 | 0.24 | 0.38 | 0.22 | SNP       |
| chr6_32633636_G_C | 32633636  | 1.9 | 1.4 | 2.7 | 6.19E-05 | 0.24 | 0.38 | 0.23 | SNP       |
| chr6_32441008_C_T | 32441008  | 2.0 | 1.4 | 2.9 | 6.21E-05 | 0.31 | 0.46 | 0.29 | SNP       |
| chr6_32611229_T_G | 32611229  | 0.5 | 0.3 | 0.7 | 6.22E-05 | 0.46 | 0.34 | 0.48 | SNP       |
| chr6_32634091_G_C | 32634091  | 1.9 | 1.4 | 2.7 | 6.23E-05 | 0.24 | 0.37 | 0.22 | SNP       |
| chr6_32634387_T_C | 32634387  | 0.4 | 0.3 | 0.7 | 6.23E-05 | 0.31 | 0.22 | 0.32 | SNP       |
| chr6_32628785_A_G | 32628785  | 0.5 | 0.3 | 0.7 | 6.25E-05 | 0.48 | 0.35 | 0.49 | SNP       |
| chr6_32612111_G_A | 32612111  | 2.0 | 1.4 | 2.9 | 6.26E-05 | 0.29 | 0.43 | 0.27 | SNP       |
| chr6_32634090_T_C | 32634090  | 1.9 | 1.4 | 2.7 | 6.33E-05 | 0.24 | 0.37 | 0.22 | SNP       |
| chr6_32628533_T_C | 32628533  | 2.0 | 1.4 | 2.7 | 6.35E-05 | 0.23 | 0.37 | 0.22 | SNP       |
| chr6_32610704_C_T | 32610704  | 0.4 | 0.3 | 0.7 | 6.35E-05 | 0.33 | 0.24 | 0.34 | SNP       |
| chr6_32635226_G_T | 32635226  | 0.5 | 0.3 | 0.7 | 6.37E-05 | 0.47 | 0.34 | 0.48 | SNP       |
| chr6_32627494_T_C | 32627494  | 2.0 | 1.4 | 2.7 | 6.45E-05 | 0.24 | 0.39 | 0.23 | SNP       |
| chr6_32635172_C_T | 32635172  | 1.9 | 1.4 | 2.7 | 6.51E-05 | 0.24 | 0.38 | 0.23 | SNP       |
| chr6_32609126_C_T | 32609126  | 0.5 | 0.3 | 0.7 | 6.61E-05 | 0.47 | 0.34 | 0.48 | SNP       |
| chr6_32612104_C_T | 32612104  | 2.0 | 1.4 | 2.9 | 6.68E-05 | 0.29 | 0.43 | 0.27 | SNP       |
| chr6_32627777_G_C | 32627777  | 1.9 | 1.4 | 2.7 | 6.83E-05 | 0.24 | 0.38 | 0.22 | SNP       |
| chr6_32603487_C_T | 32603487  | 0.5 | 0.3 | 0.7 | 6.90E-05 | 0.46 | 0.33 | 0.47 | SNP       |
| chr6_32604564_C_T | 32604564  | 2.1 | 1.4 | 2.9 | 6.90E-05 | 0.32 | 0.47 | 0.31 | SNP       |
| chr6_32605920_A_G | 32605920  | 0.5 | 0.3 | 0.7 | 6.94E-05 | 0.46 | 0.33 | 0.47 | SNP       |
| chr6_32636217_G_A | 32636217  | 2.0 | 1.4 | 2.7 | 6.98E-05 | 0.23 | 0.36 | 0.22 | SNP       |
| chr6_32605943_A_G | 32605943  | 0.5 | 0.3 | 0.7 | 6.99E-05 | 0.46 | 0.33 | 0.47 | SNP       |
| chr6_32629755_G_A | 32629755  | 1.9 | 1.4 | 2.7 | 7.01E-05 | 0.24 | 0.37 | 0.22 | SNP       |
| chr6_32610968_A_G | 32610968  | 0.5 | 0.3 | 0.7 | 7.11E-05 | 0.47 | 0.40 | 0.25 | SNP       |
| chr6_32607008_T_G | 32607008  | 0.5 | 0.3 | 0.7 | 7.20E-05 | 0.46 | 0.33 | 0.47 | SNP       |
| chr6_32610769_C_A | 32610769  | 0.5 | 0.3 | 0.7 | 7.29E-05 | 0.34 | 0.25 | 0.34 | SNP       |
| chr6_32636443_A_C | 32636443  | 1.9 | 1.4 | 2.7 | 7.35E-05 | 0.23 | 0.37 | 0.22 | SNP       |
| chr6_32608880_G_A | 32608880  | 2.0 | 1.4 | 2.9 | 7.35E-05 | 0.33 | 0.47 | 0.31 | SNP       |
| chr6_32634485_C_A | 32634485  | 0.4 | 0.3 | 0.7 | 7.42E-05 | 0.32 | 0.23 | 0.33 | SNP       |
| chr6_32612008_T_C | 32612008  | 2.0 | 1.4 | 2.9 | 7.43E-05 | 0.28 | 0.43 | 0.27 | SNP       |
| chr6_32634917_T_A | 32634917  | 1.9 | 1.4 | 2.7 | 7.57E-05 | 0.24 | 0.38 | 0.23 | SNP       |
| chr6_32629543_T_C | 32629543  | 1.9 | 1.4 | 2.7 | 7.63E-05 | 0.24 | 0.38 | 0.23 | SNP       |
| chr6_32606176_T_A | 32606176  | 0.5 | 0.3 | 0.7 | 7.69E-05 | 0.46 | 0.33 | 0.47 | SNP       |
| chr6_32629530_C_T | 32629530  | 2.0 | 1.4 | 2.7 | 7.77E-05 | 0.24 | 0.38 | 0.23 | SNP       |
| chr6_32628787_C_T | 32628787  | 2.0 | 1.4 | 2.7 | 8.10E-05 | 0.23 | 0.37 | 0.22 | SNP       |
| chr6_32610059_G_T | 32610059  | 0.5 | 0.3 | 0.7 | 8.15E-05 | 0.46 | 0.33 | 0.47 | SNP       |
| chr6_32628030_G_A | 32628030  | 1.9 | 1.4 | 2.6 | 8.27E-05 | 0.42 | 0.55 | 0.41 | SNP       |
| chr6_32608417_G_A | 32608417  | 2.0 | 1.4 | 2.7 | 8.39E-05 | 0.24 | 0.44 | 0.27 | SNP       |
| chr6_32636138_A_G | 32636138  | 1.9 | 1.4 | 2.7 | 8.57E-05 | 0.23 | 0.36 | 0.22 | SNP       |
| chr6_32611964_C_T | 32611964  | 2.1 | 1.4 | 3.0 | 8.62E-05 | 0.28 | 0.42 | 0.27 | SNP       |
| chr6_32628916_G_A | 32628916  | 2.0 | 1.4 | 2.7 | 8.62E-05 | 0.23 | 0.37 | 0.22 | SNP       |
| chr6_32606217_G_A | 32606217  | 2.0 | 1.4 | 2.8 | 8.89E-05 | 0.30 | 0.45 | 0.29 | SNP       |
| chr6_32628776_A_C | 32628776  | 0.5 | 0.3 | 0.7 | 9.05E-05 | 0.48 | 0.35 | 0.49 | SNP       |
| chr6_32612041_A_G | 32612041  | 2.0 | 1.4 | 2.9 | 9.20E-05 | 0.29 | 0.43 | 0.27 | SNP       |
| chr6_32612410_C_T | 32612410  | 0.4 | 0.3 | 0.7 | 9.23E-05 | 0.45 | 0.31 | 0.46 | SNP       |
| chr6_32633767_G_T | 32633767  | 1.9 | 1.4 | 2.6 | 9.25E-05 | 0.24 | 0.37 | 0.22 | SNP       |
| chr6_32634593_G_C | 32634593  | 1.9 | 1.4 | 2.7 | 9.38E-05 | 0.23 | 0.37 | 0.22 | SNP       |
| chr6_32627489_G_C | 32627489  | 0.5 | 0.3 | 0.7 | 9.45E-05 | 0.44 | 0.31 | 0.45 | SNP       |
| chr6_32612003_T_C | 32612003  | 0.5 | 0.3 | 0.7 | 9.47E-05 | 0.48 | 0.35 | 0.49 | SNP       |
| chr6_32633781_C_T | 32633781  | 1.9 | 1.4 | 2.6 | 9.54E-05 | 0.24 | 0.37 | 0.23 | SNP       |
| chr6_32609105_A_G | 32609105  | 0.4 | 0.3 | 0.7 | 9.55E-05 | 0.47 | 0.34 | 0.48 | SNP       |
| chr6_32629328_G_A | 32629328  | 2.0 | 1.4 | 2.8 | 9.82E-05 | 0.23 | 0.35 | 0.22 | SNP       |
| chr6_32627833_A_G | 32627833  | 1.8 | 1.4 | 2.5 | 9.97E-05 | 0.41 | 0.53 | 0.40 | SNP       |
| chr6_32605705_T_C | 32605705  | 0.5 | 0.3 | 0.7 | 0.00010  | 0.46 | 0.34 | 0.47 | SNP       |
| chr6_32605914_T_C | 32605914  | 2.0 | 1.4 | 2.8 | 0.00010  | 0.46 | 0.34 | 0.47 | SNP       |
| chr6_32636063_G_A | 32636063  | 1.9 | 1.4 | 2.6 | 0.00010  | 0.24 | 0.37 | 0.22 | SNP       |
| chr6_32605708_A_G | 32605708  | 0.5 | 0.3 | 0.7 | 0.00010  | 0.46 | 0.34 | 0.47 | SNP       |
| chr6_32627714_G_C | 32627714  | 1.9 | 1.4 | 2.7 | 0.00010  | 0.45 | 0.33 | 0.47 | SNP       |
| chr6_32627485_C_T | 32627485  | 0.5 | 0.3 | 0.7 | 0.00010  | 0.44 | 0.31 | 0.45 | SNP       |
| chr6_32611650_G_A | 32611650  | 2.0 | 1.4 | 2.9 | 0.00010  | 0.28 | 0.42 | 0.27 | SNP       |
| chr6_32629549_G_A | 32629549  | 1.9 | 1.4 | 2.6 | 0.00011  | 0.24 | 0.37 | 0.23 | SNP       |
| chr6_32606085_T_A | 32606085  | 2.0 | 1.4 | 2.7 | 0.00011  | 0.46 | 0.33 | 0.47 | SNP       |
| chr6_32611958_C_G | 32611958  | 2.1 | 1.4 | 3.0 | 0.00011  | 0.28 | 0.41 | 0.27 | SNP       |
| chr6_32629531_A_G | 32629531  | 1.9 | 1.4 | 2.6 | 0.00011  | 0.24 | 0.37 | 0.23 | SNP       |
| chr6_32620774_C_G | 32620774  | 2.0 | 1.4 | 2.9 | 0.00011  | 0.26 | 0.40 | 0.25 | SNP       |
| chr6_32610994_C_A | 32610994  | 2.0 | 1.4 | 2.9 | 0.00011  | 0.26 | 0.40 | 0.25 | SNP       |
| chr6_32627635_G_T | 32627635  | 0.5 | 0.3 | 0.7 | 0.00011  | 0.45 | 0.33 | 0.46 | SNP       |
| HLA_2Hhd_B_06_D1  | 326132052 | 3.8 | 1.8 | 7.6 | 0.00012  | 0.12 | 0.14 | 0.11 | HLA (HLA) |
| chr6_32634355_G_A | 32634355  | 1.9 | 1.4 | 2.6 | 0.00012  | 0.24 | 0.37 | 0.22 | SNP       |
| chr6_32501301_G_C | 32501301  | 0.5 | 0.3 | 0.7 | 0.00012  | 0.39 | 0.26 | 0.40 | SNP       |
| chr6_32610997_C_G | 32610997  | 2.0 | 1.4 | 2.9 | 0.00012  | 0.26 | 0.40 | 0.25 | SNP       |
| chr6_32627747_G_C | 32627747  | 0.5 | 0.3 | 0.7 | 0.00012  | 0.41 | 0.22 | 0.32 | SNP       |
| chr6_32501296_G_A | 32501296  | 0.5 | 0.3 | 0.7 | 0.00013  | 0.39 | 0.26 | 0.40 | SNP       |
| chr6_32608909_T_C | 32608909  | 2.0 | 1.4 | 2.9 | 0.00013  | 0.26 | 0.41 | 0.25 | SNP       |
| chr6_32501459_T_C | 32501459  | 0.5 | 0.3 | 0.7 | 0.00013  | 0.39 | 0.26 | 0.41 | SNP       |
| chr6_32636172_C_T | 32636172  | 1.9 | 1.4 | 2.6 | 0.00013  | 0.23 | 0.37 | 0.22 | SNP       |
| chr6_32634139_C_T | 32634139  | 1.9 | 1.4 | 2.6 | 0.00013  | 0.24 | 0.37 | 0.23 | SNP       |
| chr6_32633617_A_G | 32633617  | 0.5 | 0.3 | 0.7 | 0.00014  | 0.45 | 0.33 | 0.46 | SNP       |
| chr6_32627517_G_C | 32627517  | 0.5 | 0.3 | 0.7 | 0.00014  | 0.46 | 0.33 | 0.47 | SNP       |
| chr6_32627646_G_A | 32627646  | 0.5 | 0.3 | 0.7 | 0.00014  | 0.45 | 0.33 | 0.47 | SNP       |
| chr6_32629330_C_T | 32629330  | 1.9 | 1.4 | 2.7 | 0.00014  | 0.23 | 0.35 | 0.22 | SNP       |
| chr6_32605295_C_C | 32605295  | 1.9 | 1.4 | 2.7 | 0.00014  | 0.32 | 0.47 | 0.30 | SNP       |
| HLA_2Hhd_B_15_D1  | 31321652  | 0.3 | 0.2 | 0.6 | 0.00014  | 0.10 | 0.06 | 0.10 | HLA (HLA) |
| chr6_31323416_G_C | 31323416  | 3.7 | 1.9 | 7.1 | 0.00015  | 0.12 | 0.14 | 0.12 | SNP       |
| chr6_32607193_T_C | 32607193  | 2.0 | 1.4 | 2.9 | 0.00015  | 0.33 | 0.48 | 0.32 | SNP       |
| chr6_32627561_C_T | 32627561  | 0.5 | 0.3 | 0.7 | 0.00015  | 0.32 | 0.24 | 0.34 | SNP       |
| chr6_32611769_G_C | 32611769  | 2.0 | 1.4 | 2.9 | 0.00015  | 0.30 | 0.44 | 0.29 | SNP       |
| chr6_32633959_T_C | 32633959  | 1.9 | 1.4 | 2.6 | 0.00016  | 0.24 | 0.37 | 0.23 | SNP       |
| chr6_32609312_C_A | 32609312  | 0.5 | 0.3 | 0.7 | 0.00016  | 0.47 | 0.34 | 0.48 | SNP       |
| chr6_32633909_T_A | 32633909  | 0.5 | 0.3 | 0.7 | 0.00016  | 0.33 | 0.25 | 0.34 | SNP       |
| chr6_32611968_T_G | 32611968  | 0.5 | 0.3 | 0.7 | 0.00016  | 0.48 | 0.37 | 0.49 | SNP       |
| chr6_32634150_A_G | 32634150  | 1.9 | 1.4 | 2.6 | 0.00016  | 0.24 | 0.37 | 0.23 | SNP       |
| chr6_32628791_T_C | 32628791  | 0.5 | 0.3 | 0.7 | 0.00016  | 0.48 | 0.35 | 0.48 | SNP       |
| chr6_32611931_T_A | 32611931  | 0.5 | 0.3 | 0.7 | 0.00016  | 0.47 | 0.35 | 0.48 | SNP       |
| chr6_32633906_A_C | 32633906  | 0.5 | 0.3 | 0.7 | 0.00016  | 0.33 | 0.25 | 0.34 | SNP       |
| chr6_32611265_C_T | 32611265  | 2.0 | 1.4 | 2.8 | 0.00016  | 0.28 | 0.42 | 0.27 | SNP       |
| chr6_32629422_T_C | 32629422  | 1.9 | 1.4 | 2.6 | 0.00016  | 0.23 | 0.37 | 0.22 | SNP       |
| chr6_31321267_A_C | 31321267  | 3.9 | 1.9 | 8.0 | 0.00016  | 0.12 | 0.13 | 0.12 | SNP       |
| chr6_32629582_T_C | 32629582  | 0.5 | 0.3 | 0.7 | 0.00017  | 0.31 | 0.23 | 0.32 | SNP       |
| chr6_32636040_C_T | 32636040  | 0.5 | 0.3 | 0.7 | 0.00017  | 0.32 | 0.23 | 0.32 | SNP       |
| chr6_32629398_G_C | 32629398  | 1.9 | 1.4 | 2.6 | 0.00018  | 0.24 | 0.37 | 0.23 | SNP       |
| chr6_32609453_C_T | 32609453  | 2.0 | 1.4 | 2.8 | 0.00018  | 0.33 | 0.48 | 0.32 | SNP       |
| chr6_32629347_T_C | 32629347  | 2.0 | 1.4 | 2.8 | 0.00018  | 0.36 | 0.51 | 0.35 | SNP       |
| chr6_32635033_T_G | 32635033  | 1.9 | 1.3 | 2.6 | 0.00018  | 0.24 | 0.37 | 0.22 | SNP       |
| chr6_32610860_G_T | 32610860  | 2.0 | 1.4 | 2.8 | 0.00018  | 0.28 | 0.43 | 0.27 | SNP       |
| chr6_32604642_A_G | 32604642  | 2.0 | 1.4 | 2.9 | 0.00021  | 0.28 | 0.42 | 0.26 | SNP       |
| chr6_32796310_A_G | 32796310  | 2.8 | 1.6 | 4.7 | 0.00022  | 0.03 | 0.08 | 0.03 | SNP       |
| chr6_32501311_C_T | 32501311  | 0.5 | 0.4 | 0.7 | 0.00023  | 0.39 | 0.26 | 0.40 | SNP       |
| chr6_32628737_G_A | 32628737  | 0.5 | 0.4 | 0.7 | 0.00023  | 0.48 | 0.25 | 0.49 | SNP       |
| chr6_32606701_A_G | 326067    |     |     |     |          |      |      |      |           |

|                   |          |     |     |     |         |      |      |      |     |
|-------------------|----------|-----|-----|-----|---------|------|------|------|-----|
| chr6_31473746_G_A | 31473746 | 3.6 | 1.7 | 7.4 | 0.00054 | 0.12 | 0.14 | 0.12 | SNP |
| chr6_32603098_T_C | 32603098 | 1.7 | 1.3 | 2.4 | 0.00058 | 0.48 | 0.63 | 0.46 | SNP |
| chr6_32609358_C_T | 32609358 | 1.9 | 1.3 | 2.7 | 0.00059 | 0.29 | 0.42 | 0.27 | SNP |
| chr6_31558702_C_T | 31558702 | 3.6 | 1.7 | 7.6 | 0.00061 | 0.12 | 0.13 | 0.12 | SNP |
| chr6_31222701_C_T | 31222701 | 0.0 | 0.0 | 0.0 | 0.00062 | 0.0  | 0.2  | 0.11 | SNP |
| chr6_32629509_A_C | 32629509 | 1.9 | 1.3 | 2.6 | 0.00067 | 0.37 | 0.50 | 0.36 | SNP |
| chr6_32636385_A_T | 32636385 | 1.7 | 1.2 | 2.3 | 0.00068 | 0.37 | 0.47 | 0.36 | SNP |
| chr6_32603412_T_C | 32603412 | 1.7 | 1.3 | 2.4 | 0.00069 | 0.48 | 0.63 | 0.46 | SNP |
| chr6_31242955_C_T | 31242955 | 0.4 | 0.2 | 0.7 | 0.00069 | 0.10 | 0.07 | 0.10 | SNP |
| chr6_32782030_A_C | 32782030 | 1.8 | 1.3 | 2.5 | 0.00071 | 0.18 | 0.22 | 0.18 | SNP |
| chr6_32603029_T_C | 32603029 | 0.5 | 0.4 | 0.8 | 0.00073 | 0.28 | 0.15 | 0.29 | SNP |
| chr6_32609380_C_T | 32609380 | 1.9 | 1.3 | 2.8 | 0.00075 | 0.35 | 0.47 | 0.34 | SNP |
| chr6_32636364_G_A | 32636364 | 1.7 | 1.2 | 2.3 | 0.00074 | 0.37 | 0.47 | 0.37 | SNP |
| chr6_32631039_G_A | 32631039 | 0.5 | 0.3 | 0.7 | 0.00075 | 0.37 | 0.29 | 0.38 | SNP |
| chr6_31255684_C_A | 31255684 | 0.4 | 0.2 | 0.7 | 0.00078 | 0.10 | 0.08 | 0.11 | SNP |
| chr6_3125795_G_T  | 3125795  | 0.4 | 0.2 | 0.7 | 0.00078 | 0.10 | 0.08 | 0.11 | SNP |
| chr6_32370684_A_G | 32370684 | 1.8 | 1.3 | 2.6 | 0.00079 | 0.27 | 0.40 | 0.26 | SNP |
| chr6_31237275_T_C | 31237275 | 0.4 | 0.2 | 0.7 | 0.00081 | 0.10 | 0.08 | 0.11 | SNP |
| chr6_32078713_A_C | 32078713 | 1.9 | 1.3 | 2.8 | 0.00082 | 0.11 | 0.19 | 0.15 | SNP |
| chr6_31323721_G_C | 31323721 | 0.4 | 0.2 | 0.7 | 0.00082 | 0.10 | 0.08 | 0.11 | SNP |
| chr6_29907740_A_G | 29907740 | 0.6 | 0.4 | 0.8 | 0.00083 | 0.47 | 0.42 | 0.47 | SNP |
| chr6_31323792_A_G | 31323792 | 0.4 | 0.3 | 0.7 | 0.00084 | 0.10 | 0.08 | 0.11 | SNP |
| chr6_31370367_G_A | 31370367 | 0.4 | 0.2 | 0.7 | 0.00085 | 0.10 | 0.08 | 0.11 | SNP |
| chr6_32501245_A_G | 32501245 | 0.5 | 0.3 | 0.7 | 0.00085 | 0.19 | 0.10 | 0.20 | SNP |
| chr6_31370329_G_A | 31370329 | 0.4 | 0.3 | 0.7 | 0.00088 | 0.10 | 0.08 | 0.10 | SNP |
| chr6_32629335_C_A | 32629335 | 1.8 | 1.3 | 2.6 | 0.00089 | 0.37 | 0.50 | 0.36 | SNP |
| chr6_32521951_A_C | 32521951 | 0.5 | 0.4 | 0.8 | 0.00090 | 0.38 | 0.26 | 0.39 | SNP |
| chr6_32500925_A_C | 32500925 | 0.5 | 0.3 | 0.7 | 0.00090 | 0.19 | 0.10 | 0.20 | SNP |
| chr6_31240654_G_A | 31240654 | 1.8 | 1.3 | 2.6 | 0.00092 | 0.27 | 0.41 | 0.26 | SNP |
| chr6_32370616_T_C | 32370616 | 1.8 | 1.3 | 2.6 | 0.00093 | 0.27 | 0.40 | 0.26 | SNP |
| chr6_32520465_A_G | 32520465 | 0.6 | 0.4 | 0.8 | 0.00093 | 0.38 | 0.26 | 0.39 | SNP |
| chr6_3124599_T_C  | 3124599  | 0.4 | 0.3 | 0.6 | 0.00094 | 0.14 | 0.10 | 0.14 | SNP |
| chr6_32603488_A_G | 32603488 | 0.5 | 0.4 | 0.8 | 0.00094 | 0.28 | 0.15 | 0.29 | SNP |
| chr6_31239227_T_C | 31239227 | 2.1 | 1.4 | 3.3 | 0.00095 | 0.38 | 0.45 | 0.37 | SNP |
| chr6_3123639_G_A  | 3123639  | 1.7 | 1.2 | 2.4 | 0.00095 | 0.16 | 0.21 | 0.16 | SNP |
| chr6_32083355_T_C | 32083355 | 1.8 | 1.3 | 2.8 | 0.00096 | 0.28 | 0.15 | 0.29 | SNP |
| chr6_32611504_C_T | 32611504 | 0.5 | 0.4 | 0.8 | 0.00101 | 0.48 | 0.37 | 0.49 | SNP |
| chr6_32364356_A_G | 32364356 | 1.8 | 1.3 | 2.6 | 0.00102 | 0.27 | 0.40 | 0.26 | SNP |
| chr6_32636389_T_C | 32636389 | 1.7 | 1.3 | 2.5 | 0.00109 | 0.23 | 0.34 | 0.22 | SNP |
| chr6_32376746_C_T | 32376746 | 1.8 | 1.3 | 2.5 | 0.00110 | 0.27 | 0.41 | 0.26 | SNP |
| chr6_32628845_G_A | 32628845 | 1.8 | 1.3 | 2.6 | 0.00111 | 0.36 | 0.50 | 0.35 | SNP |
| chr6_32471719_C_T | 32471719 | 1.8 | 1.3 | 2.6 | 0.00111 | 0.27 | 0.40 | 0.26 | SNP |
| chr6_31229695_C_A | 31229695 | 1.9 | 1.3 | 2.8 | 0.00113 | 0.26 | 0.41 | 0.25 | SNP |
| chr6_32405821_T_C | 32405821 | 1.8 | 1.3 | 2.7 | 0.00115 | 0.24 | 0.37 | 0.23 | SNP |
| chr6_29893960_T_C | 29893960 | 1.8 | 1.3 | 2.6 | 0.00115 | 0.20 | 0.25 | 0.19 | SNP |
| chr6_32629764_C_T | 32629764 | 1.8 | 1.3 | 2.5 | 0.00115 | 0.27 | 0.50 | 0.36 | SNP |
| chr6_32629859_G_A | 32629859 | 0.6 | 0.4 | 0.8 | 0.00123 | 0.49 | 0.39 | 0.50 | SNP |
| chr6_31514247_A_G | 31514247 | 3.4 | 1.6 | 7.2 | 0.00124 | 0.12 | 0.13 | 0.12 | SNP |
| chr6_31378117_C_T | 31378117 | 0.4 | 0.2 | 0.7 | 0.00133 | 0.09 | 0.06 | 0.09 | SNP |
| chr6_31611510_C_A | 31611510 | 0.6 | 0.4 | 0.8 | 0.00133 | 0.47 | 0.36 | 0.48 | SNP |
| chr6_3166295_C_A  | 3166295  | 0.4 | 0.3 | 0.7 | 0.00137 | 0.11 | 0.08 | 0.11 | SNP |
| chr6_32521117_T_C | 32521117 | 0.6 | 0.4 | 0.8 | 0.00142 | 0.49 | 0.35 | 0.51 | SNP |
| chr6_32374622_A_T | 32374622 | 1.8 | 1.2 | 2.5 | 0.00143 | 0.26 | 0.41 | 0.26 | SNP |
| chr6_32611466_A_G | 32611466 | 1.8 | 1.3 | 2.6 | 0.00145 | 0.26 | 0.40 | 0.25 | SNP |
| chr6_32341473_T_C | 32341473 | 1.8 | 1.2 | 2.5 | 0.00147 | 0.28 | 0.41 | 0.26 | SNP |
| chr6_31240544_G_A | 31240544 | 0.4 | 0.2 | 0.7 | 0.00149 | 0.10 | 0.07 | 0.10 | SNP |
| chr6_31324348_C_T | 31324348 | 0.4 | 0.2 | 0.7 | 0.00150 | 0.11 | 0.07 | 0.11 | SNP |
| chr6_31324891_C_T | 31324891 | 0.4 | 0.2 | 0.7 | 0.00150 | 0.10 | 0.07 | 0.11 | SNP |
| chr6_31240060_G_A | 31240060 | 2.0 | 1.3 | 3.0 | 0.00150 | 0.33 | 0.37 | 0.32 | SNP |
| chr6_32611474_G_A | 32611474 | 1.6 | 1.2 | 2.6 | 0.00151 | 0.26 | 0.40 | 0.25 | SNP |
| chr6_32410941_C_T | 32410941 | 0.6 | 0.4 | 0.8 | 0.00152 | 0.50 | 0.60 | 0.49 | SNP |
| chr6_32341318_A_G | 32341318 | 1.7 | 1.2 | 2.5 | 0.00152 | 0.28 | 0.41 | 0.26 | SNP |
| chr6_32323731_T_C | 32323731 | 1.9 | 1.2 | 2.8 | 0.00156 | 0.29 | 0.41 | 0.27 | SNP |
| chr6_32363844_C_T | 32363844 | 1.8 | 1.2 | 2.5 | 0.00156 | 0.27 | 0.40 | 0.26 | SNP |
| chr6_32375352_A_C | 32375352 | 1.7 | 1.2 | 2.5 | 0.00158 | 0.29 | 0.41 | 0.27 | SNP |
| chr6_32629400_A_G | 32629400 | 1.8 | 1.2 | 2.5 | 0.00159 | 0.37 | 0.50 | 0.35 | SNP |
| chr6_32636380_G_C | 32636380 | 1.7 | 1.2 | 2.5 | 0.00161 | 0.23 | 0.34 | 0.22 | SNP |
| chr6_32635713_C_T | 32635713 | 0.6 | 0.4 | 0.8 | 0.00166 | 0.48 | 0.37 | 0.49 | SNP |
| chr6_31241664_G_A | 31241664 | 2.2 | 1.3 | 3.6 | 0.00166 | 0.14 | 0.17 | 0.14 | SNP |
| chr6_32611472_G_A | 32611472 | 1.6 | 1.2 | 2.6 | 0.00169 | 0.26 | 0.40 | 0.25 | SNP |
| chr6_32375374_G_A | 32375374 | 1.7 | 1.2 | 2.5 | 0.00169 | 0.29 | 0.41 | 0.28 | SNP |
| chr6_32605583_A_G | 32605583 | 1.6 | 1.2 | 2.2 | 0.00182 | 0.38 | 0.50 | 0.37 | SNP |
| chr6_31244448_G_A | 31244448 | 0.4 | 0.2 | 0.7 | 0.00185 | 0.11 | 0.07 | 0.11 | SNP |
| chr6_31429927_T_C | 31429927 | 2.1 | 1.3 | 3.3 | 0.00187 | 0.17 | 0.19 | 0.16 | SNP |
| chr6_31129310_C_T | 31129310 | 3.0 | 1.5 | 5.8 | 0.00193 | 0.12 | 0.13 | 0.12 | SNP |
| chr6_31721033_G_A | 31721033 | 3.6 | 1.6 | 8.1 | 0.00198 | 0.12 | 0.13 | 0.12 | SNP |
| chr6_32609094_C_T | 32609094 | 1.7 | 1.2 | 2.5 | 0.00200 | 0.25 | 0.47 | 0.34 | SNP |
| chr6_29892137_A_G | 29892137 | 1.6 | 1.2 | 2.2 | 0.00208 | 0.13 | 0.29 | 0.23 | SNP |
| chr6_31242895_T_C | 31242895 | 1.7 | 1.2 | 2.4 | 0.00213 | 0.39 | 0.44 | 0.38 | SNP |
| chr6_32611152_G_A | 32611152 | 1.7 | 1.2 | 2.4 | 0.00214 | 0.21 | 0.34 | 0.20 | SNP |
| chr6_32797488_T_C | 32797488 | 1.6 | 1.2 | 2.2 | 0.00216 | 0.30 | 0.40 | 0.30 | SNP |
| chr6_31243830_A_G | 31243830 | 1.7 | 1.2 | 2.3 | 0.00217 | 0.39 | 0.44 | 0.38 | SNP |
| chr6_31465047_G_C | 31465047 | 3.2 | 1.5 | 2.5 | 0.00218 | 0.12 | 0.13 | 0.12 | SNP |
| chr6_31243979_A_T | 31243979 | 1.9 | 1.3 | 2.9 | 0.00223 | 0.32 | 0.37 | 0.32 | SNP |
| chr6_32376348_G_A | 32376348 | 1.8 | 1.2 | 2.6 | 0.00223 | 0.24 | 0.37 | 0.23 | SNP |
| chr6_29910358_C_G | 29910358 | 1.6 | 1.2 | 2.6 | 0.00232 | 0.46 | 0.51 | 0.45 | SNP |
| chr6_32375973_C_A | 32375973 | 1.8 | 1.2 | 2.5 | 0.00232 | 0.24 | 0.37 | 0.23 | SNP |
| chr6_32374131_C_G | 32374131 | 1.7 | 1.2 | 2.5 | 0.00232 | 0.27 | 0.40 | 0.26 | SNP |
| chr6_31708463_C_A | 31708463 | 3.5 | 1.6 | 7.9 | 0.00235 | 0.12 | 0.13 | 0.12 | SNP |
| chr6_31241981_G_A | 31241981 | 1.9 | 1.3 | 3.1 | 0.00236 | 0.13 | 0.14 | 0.13 | SNP |
| chr6_32375330_G_A | 32375330 | 1.7 | 1.2 | 2.4 | 0.00236 | 0.28 | 0.41 | 0.27 | SNP |
| chr6_31244021_A_G | 31244021 | 1.9 | 1.3 | 2.9 | 0.00239 | 0.32 | 0.36 | 0.31 | SNP |
| chr6_32376176_C_T | 32376176 | 1.7 | 1.2 | 2.4 | 0.00239 | 0.28 | 0.41 | 0.27 | SNP |
| chr6_32375695_G_A | 32375695 | 1.7 | 1.2 | 2.4 | 0.00239 | 0.28 | 0.41 | 0.27 | SNP |
| chr6_32411035_C_A | 32411035 | 0.6 | 0.4 | 0.8 | 0.00241 | 0.50 | 0.40 | 0.51 | SNP |
| chr6_3252698_G_T  | 3252698  | 0.5 | 0.4 | 0.8 | 0.00245 | 0.41 | 0.32 | 0.42 | SNP |
| chr6_32611403_G_A | 32611403 | 1.7 | 1.2 | 2.4 | 0.00256 | 0.26 | 0.40 | 0.25 | SNP |
| chr6_32375424_G_A | 32375424 | 1.7 | 1.2 | 2.4 | 0.00256 | 0.29 | 0.41 | 0.28 | SNP |
| chr6_31379115_G_A | 31379115 | 0.6 | 0.4 | 0.8 | 0.00256 | 0.21 | 0.17 | 0.22 | SNP |
| chr6_3253816_C_G  | 3253816  | 1.6 | 1.2 | 2.2 | 0.00263 | 0.27 | 0.40 | 0.26 | SNP |
| chr6_32555317_C_T | 32555317 | 0.4 | 0.2 | 0.7 | 0.00267 | 0.10 | 0.04 | 0.10 | SNP |
| chr6_32190969_C_T | 32190969 | 3.1 | 1.4 | 6.4 | 0.00269 | 0.01 | 0.04 | 0.01 | SNP |
| chr6_31675765_G_A | 31675765 | 1.7 | 1.2 | 2.4 | 0.00275 | 0.19 | 0.24 | 0.19 | SNP |
| chr6_31243846_C_T | 31243846 | 2.2 | 1.3 | 3.6 | 0.00276 | 0.14 | 0.16 | 0.14 | SNP |
| chr6_31430065_C_T | 31430065 | 3.1 | 1.5 | 6.6 | 0.00280 | 0.11 | 0.13 | 0.11 | SNP |
| chr6_31237048_G_A | 31237048 | 1.8 | 1.2 | 2.6 | 0.00280 | 0.34 | 0.39 | 0.34 | SNP |
| chr6_31246324_A_C | 31246324 | 2.2 | 1.3 | 3.5 | 0.00282 | 0.14 | 0.16 | 0.14 | SNP |
| chr6_31269574_T_C | 31269574 | 0.6 | 0.5 | 0.8 | 0.00289 | 0.29 | 0.24 | 0.30 | SNP |
| chr6_32627652_C_G | 32627652 | 1.7 | 1.2 | 2.4 | 0.00291 | 0.37 | 0.50 | 0.36 | SNP |
| chr6_32610349_C_A | 32610349 | 1.6 | 1.2 | 2.2 | 0.00294 | 0.44 | 0.54 | 0.43 | SNP |
| chr6_31636742_G_A | 31636742 | 3.3 | 1.5 | 7.2 | 0.00299 | 0.12 | 0.13 | 0.12 | SNP |
| chr6_32627795_A_G | 32627795 | 1.6 | 1.2 | 2.2 | 0.00301 | 0.47 | 0.57 | 0.46 | SNP |
| chr6_32628420_C_T | 32628420 | 1.7 | 1.2 | 2.5 | 0.00302 | 0.35 | 0.48 | 0.34 | SNP |
| chr6_29901806_C_T | 29901806 | 1.7 | 1.2 | 2.4 | 0.00303 | 0.22 | 0.26 | 0.21 | SNP |
| chr6_31243884     |          |     |     |     |         |      |      |      |     |

|                      |           |     |     |     |         |      |      |      |           |
|----------------------|-----------|-----|-----|-----|---------|------|------|------|-----------|
| chr8_31627449_C_G    | 31627449  | 1.6 | 1.1 | 2.2 | 0.00460 | 0.18 | 0.23 | 0.18 | SNP       |
| chr8_31245796_C_T    | 31245796  | 2.1 | 1.2 | 3.4 | 0.00472 | 0.14 | 0.16 | 0.14 | SNP       |
| xHLA_2Hhd_A_02_01    | 29910309  | 0.6 | 0.5 | 0.9 | 0.00476 | 0.35 | 0.33 | 0.35 | HLA (HLA) |
| chr8_31253409_A_C    | 31253409  | 1.6 | 1.2 | 2.3 | 0.00479 | 0.39 | 0.49 | 0.38 | SNP       |
| chr8_31237230_G_A    | 31237230  | 1.1 | 1.2 | 2.5 | 0.00483 | 0.25 | 0.39 | 0.35 | SNP       |
| chr8_31237449_C_T    | 31237449  | 1.8 | 1.2 | 2.7 | 0.00482 | 0.32 | 0.36 | 0.31 | SNP       |
| chr8_32814244_A_T    | 32814244  | 0.5 | 0.3 | 0.8 | 0.00487 | 0.11 | 0.05 | 0.11 | SNP       |
| chr8_32813279_C_A    | 32813279  | 0.5 | 0.3 | 0.8 | 0.00490 | 0.11 | 0.05 | 0.11 | SNP       |
| chr8_31601513_A_G    | 31601513  | 1.6 | 1.1 | 2.1 | 0.00504 | 0.39 | 0.42 | 0.38 | SNP       |
| chr8_32610947_A_C    | 32610947  | 0.3 | 0.1 | 0.6 | 0.00512 | 0.06 | 0.02 | 0.06 | SNP       |
| chr8_32411833_C_T    | 32411833  | 1.6 | 1.2 | 2.2 | 0.00517 | 0.40 | 0.52 | 0.38 | SNP       |
| chr8_29090840_A_G    | 29090840  | 1.5 | 1.1 | 1.9 | 0.00529 | 0.46 | 0.49 | 0.45 | SNP       |
| chr8_32080383_C_T    | 32080383  | 0.4 | 0.2 | 0.7 | 0.00532 | 0.08 | 0.03 | 0.09 | SNP       |
| chr8_31238318_A_G    | 31238318  | 1.7 | 1.2 | 2.5 | 0.00537 | 0.35 | 0.39 | 0.35 | SNP       |
| chr8_32786882_T_C    | 32786882  | 1.8 | 1.2 | 2.7 | 0.00538 | 0.07 | 0.13 | 0.06 | SNP       |
| chr8_32409656_G_A    | 32409656  | 1.6 | 1.1 | 2.2 | 0.00539 | 0.35 | 0.48 | 0.34 | SNP       |
| chr8_31239855_G_C    | 31239855  | 1.7 | 1.2 | 2.6 | 0.00539 | 0.36 | 0.41 | 0.35 | SNP       |
| chr8_29909070_T_C    | 29909070  | 0.7 | 0.5 | 0.9 | 0.00542 | 0.45 | 0.42 | 0.45 | SNP       |
| chr8_31709778_A_G    | 31709778  | 3.3 | 1.4 | 7.1 | 0.00548 | 0.12 | 0.12 | 0.12 | SNP       |
| chr8_31473957_C_G    | 31473957  | 2.8 | 1.3 | 5.6 | 0.00547 | 0.12 | 0.13 | 0.12 | SNP       |
| chr8_31238613_G_A    | 31238613  | 1.7 | 1.2 | 2.5 | 0.00552 | 0.35 | 0.39 | 0.34 | SNP       |
| chr8_31237323_G_A    | 31237323  | 1.7 | 1.2 | 2.5 | 0.00555 | 0.35 | 0.39 | 0.34 | SNP       |
| chr8_31635710_T_C    | 31635710  | 1.5 | 1.1 | 2.1 | 0.00556 | 0.20 | 0.25 | 0.20 | SNP       |
| chr8_31921486_A_G    | 31921486  | 3.0 | 1.3 | 6.3 | 0.00560 | 0.01 | 0.03 | 0.01 | SNP       |
| chr8_32032421_C_T    | 32032421  | 0.4 | 0.2 | 0.7 | 0.00566 | 0.11 | 0.05 | 0.12 | SNP       |
| chr8_31237162_G_T    | 31237162  | 1.7 | 1.2 | 2.5 | 0.00571 | 0.34 | 0.38 | 0.34 | SNP       |
| chr8_31243859_C_T    | 31243859  | 1.7 | 1.2 | 2.4 | 0.00574 | 0.21 | 0.24 | 0.21 | SNP       |
| chr8_31237061_T_C    | 31237061  | 1.7 | 1.2 | 2.4 | 0.00574 | 0.36 | 0.40 | 0.35 | SNP       |
| chr8_31238319_A_G    | 31238319  | 0.3 | 0.4 | 0.9 | 0.00575 | 0.10 | 0.09 | 0.10 | SNP       |
| chr8_31601520_T_C    | 31601520  | 1.6 | 1.1 | 2.3 | 0.00578 | 0.19 | 0.24 | 0.18 | SNP       |
| chr8_31321268_T_G    | 31321268  | 0.6 | 0.4 | 0.8 | 0.00580 | 0.20 | 0.15 | 0.20 | SNP       |
| chr8_31237592_A_G    | 31237592  | 1.7 | 1.2 | 2.5 | 0.00585 | 0.34 | 0.38 | 0.34 | SNP       |
| chr8_29691019_G_A    | 29691019  | 0.7 | 0.5 | 0.9 | 0.00586 | 0.44 | 0.46 | 0.44 | SNP       |
| chr8_29896852_C_T    | 29896852  | 1.6 | 1.1 | 2.2 | 0.00588 | 0.25 | 0.29 | 0.24 | SNP       |
| chr8_31237124_C_T    | 31237124  | 1.7 | 1.2 | 2.5 | 0.00589 | 0.34 | 0.38 | 0.34 | SNP       |
| chr8_29796265_G_T    | 29796265  | 2.3 | 1.3 | 4.6 | 0.00590 | 0.03 | 0.06 | 0.03 | SNP       |
| chr8_29909559_A_G    | 29909559  | 1.5 | 1.1 | 1.9 | 0.00602 | 0.46 | 0.49 | 0.45 | SNP       |
| chr8_29909447_C_G    | 29909447  | 1.5 | 1.1 | 1.9 | 0.00604 | 0.46 | 0.49 | 0.45 | SNP       |
| chr8_31278773_T_C    | 31278773  | 1.6 | 1.1 | 2.2 | 0.00618 | 0.48 | 0.41 | 0.48 | SNP       |
| chr8_32410716_G_A    | 32410716  | 1.6 | 1.1 | 2.2 | 0.00624 | 0.39 | 0.51 | 0.38 | SNP       |
| chr8_32336299_A_G    | 32336299  | 0.2 | 0.0 | 0.5 | 0.00626 | 0.05 | 0.01 | 0.05 | SNP       |
| chr8_29795913_A_T    | 29795913  | 2.5 | 1.2 | 4.6 | 0.00627 | 0.03 | 0.06 | 0.03 | SNP       |
| chr8_31602489_T_C    | 31602489  | 1.6 | 1.1 | 2.2 | 0.00628 | 0.18 | 0.23 | 0.18 | SNP       |
| chr8_32603277_G_T    | 32603277  | 0.3 | 0.1 | 0.6 | 0.00640 | 0.06 | 0.02 | 0.06 | SNP       |
| chr8_29913881_T_C    | 29913881  | 0.7 | 0.5 | 0.9 | 0.00640 | 0.40 | 0.38 | 0.40 | SNP       |
| chr8_31260847_C_G    | 31260847  | 0.3 | 0.1 | 0.6 | 0.00642 | 0.06 | 0.02 | 0.06 | SNP       |
| chr8_32606406_A_G    | 32606406  | 0.6 | 0.4 | 0.9 | 0.00644 | 0.38 | 0.29 | 0.39 | SNP       |
| chr8_31237563_T_C    | 31237563  | 1.7 | 1.2 | 2.5 | 0.00646 | 0.34 | 0.38 | 0.34 | SNP       |
| chr8_32501522_A_G    | 32501522  | 1.7 | 1.2 | 2.5 | 0.00646 | 0.23 | 0.30 | 0.23 | SNP       |
| chr8_29909924_C_G    | 29909924  | 0.7 | 0.5 | 0.9 | 0.00649 | 0.45 | 0.42 | 0.45 | SNP       |
| chr8_32782387_G_A    | 32782387  | 1.6 | 1.1 | 2.2 | 0.00650 | 0.21 | 0.24 | 0.21 | SNP       |
| chr8_31237950_T_C    | 31237950  | 1.7 | 1.2 | 2.5 | 0.00650 | 0.36 | 0.41 | 0.36 | SNP       |
| chr8_29911198_T_C    | 29911198  | 1.7 | 1.2 | 2.5 | 0.00651 | 0.41 | 0.38 | 0.41 | SNP       |
| chr8_30855211_T_G    | 30855211  | 2.3 | 1.3 | 4.3 | 0.00652 | 0.11 | 0.13 | 0.11 | SNP       |
| chr8_32606682_C_G    | 32606682  | 0.3 | 0.1 | 0.6 | 0.00654 | 0.06 | 0.02 | 0.06 | SNP       |
| chr8_312608142_G_T   | 312608142 | 0.7 | 0.5 | 0.9 | 0.00656 | 0.09 | 0.03 | 0.09 | SNP       |
| chr8_32606691_T_G    | 32606691  | 0.3 | 0.1 | 0.6 | 0.00659 | 0.06 | 0.02 | 0.06 | SNP       |
| chr8_31245821_A_G    | 31245821  | 2.0 | 1.2 | 3.3 | 0.00659 | 0.14 | 0.16 | 0.14 | SNP       |
| chr8_32604166_A_G    | 32604166  | 0.3 | 0.1 | 0.6 | 0.00661 | 0.06 | 0.02 | 0.06 | SNP       |
| chr8_31239548_G_A    | 31239548  | 1.6 | 1.1 | 2.2 | 0.00668 | 0.38 | 0.48 | 0.38 | SNP       |
| chr8_29910378_C_T    | 29910378  | 0.6 | 0.4 | 0.9 | 0.00672 | 0.35 | 0.32 | 0.35 | SNP       |
| chr8_31235056_C_T    | 31235056  | 2.0 | 1.2 | 3.2 | 0.00673 | 0.15 | 0.17 | 0.15 | SNP       |
| chr8_32441129_G_A    | 32441129  | 0.3 | 0.1 | 0.6 | 0.00675 | 0.06 | 0.02 | 0.06 | SNP       |
| chr8_32609009_T_G    | 32609009  | 0.3 | 0.1 | 0.6 | 0.00677 | 0.06 | 0.02 | 0.06 | SNP       |
| chr8_31237333_A_T    | 31237333  | 1.7 | 1.2 | 2.5 | 0.00677 | 0.35 | 0.39 | 0.34 | SNP       |
| chr8_30857894_G_A    | 30857894  | 2.3 | 1.2 | 4.2 | 0.00684 | 0.11 | 0.13 | 0.11 | SNP       |
| chr8_30867527_G_A    | 30867527  | 1.7 | 1.2 | 2.5 | 0.00684 | 0.41 | 0.43 | 0.41 | SNP       |
| chr8_31238524_A_G    | 31238524  | 1.7 | 1.2 | 2.5 | 0.00684 | 0.36 | 0.40 | 0.36 | SNP       |
| chr8_31237353_C_T    | 31237353  | 1.7 | 1.2 | 2.5 | 0.00689 | 0.34 | 0.38 | 0.34 | SNP       |
| chr8_32609425_C_G    | 32609425  | 0.3 | 0.1 | 0.6 | 0.00692 | 0.06 | 0.02 | 0.06 | SNP       |
| chr8_32603896_T_C    | 32603896  | 0.3 | 0.1 | 0.6 | 0.00699 | 0.06 | 0.02 | 0.06 | SNP       |
| chr8_32608435_T_C    | 32608435  | 0.3 | 0.1 | 0.6 | 0.00708 | 0.06 | 0.02 | 0.06 | SNP       |
| chr8_32438996_T_C    | 32438996  | 0.3 | 0.1 | 0.6 | 0.00709 | 0.06 | 0.02 | 0.06 | SNP       |
| chr8_32781076_C_A    | 32781076  | 0.4 | 0.2 | 0.8 | 0.00711 | 0.10 | 0.05 | 0.10 | SNP       |
| chr8_29910892_A_G    | 29910892  | 0.6 | 0.5 | 0.9 | 0.00718 | 0.44 | 0.40 | 0.44 | SNP       |
| chr8_30515043_T_C    | 30515043  | 2.1 | 1.2 | 3.6 | 0.00720 | 0.11 | 0.13 | 0.11 | SNP       |
| chr8_31244593_C_G    | 31244593  | 0.6 | 0.4 | 0.9 | 0.00727 | 0.11 | 0.13 | 0.11 | SNP       |
| chr8_31320164_A_G    | 31320164  | 1.6 | 1.1 | 2.3 | 0.00728 | 0.23 | 0.28 | 0.22 | SNP       |
| chr8_31464992_G_A    | 31464992  | 1.6 | 1.1 | 2.3 | 0.00738 | 0.29 | 0.34 | 0.28 | SNP       |
| chr8_32441046_G_A    | 32441046  | 0.3 | 0.1 | 0.6 | 0.00747 | 0.06 | 0.02 | 0.06 | SNP       |
| chr8_31238372_G_C    | 31238372  | 1.7 | 1.1 | 2.5 | 0.00749 | 0.35 | 0.38 | 0.34 | SNP       |
| chr8_32006337_A_C    | 32006337  | 0.6 | 0.4 | 0.9 | 0.00752 | 0.34 | 0.27 | 0.34 | SNP       |
| chr8_32628606_C_A    | 32628606  | 0.3 | 0.1 | 0.6 | 0.00759 | 0.05 | 0.02 | 0.06 | SNP       |
| chr8_31616366_G_A    | 31616366  | 1.5 | 1.1 | 2.1 | 0.00763 | 0.38 | 0.41 | 0.38 | SNP       |
| chr8_32606376_T_C    | 32606376  | 0.3 | 0.1 | 0.7 | 0.00765 | 0.06 | 0.02 | 0.06 | SNP       |
| chr8_31287722_T_C    | 31287722  | 1.5 | 1.1 | 2.1 | 0.00766 | 0.47 | 0.52 | 0.46 | SNP       |
| chr8_31611404_C_A    | 31611404  | 1.6 | 1.1 | 2.2 | 0.00767 | 0.18 | 0.22 | 0.17 | SNP       |
| chr8_30229267_G_C    | 30229267  | 2.2 | 1.2 | 3.8 | 0.00777 | 0.10 | 0.12 | 0.10 | SNP       |
| chr8_29893982_C_T    | 29893982  | 1.7 | 1.1 | 2.4 | 0.00781 | 0.19 | 0.22 | 0.19 | SNP       |
| chr8_32611145_T_A    | 32611145  | 1.6 | 1.1 | 2.2 | 0.00790 | 0.21 | 0.23 | 0.20 | SNP       |
| chr8_32598284_T_C    | 32598284  | 0.4 | 0.2 | 0.8 | 0.00793 | 0.08 | 0.03 | 0.08 | SNP       |
| chr8_31236524_G_A    | 31236524  | 1.7 | 1.1 | 2.5 | 0.00797 | 0.35 | 0.39 | 0.35 | SNP       |
| chr8_32441696_C_T    | 32441696  | 0.4 | 0.2 | 0.7 | 0.00801 | 0.07 | 0.03 | 0.07 | SNP       |
| chr8_31085356_C_G    | 31085356  | 2.5 | 1.2 | 4.8 | 0.00802 | 0.12 | 0.13 | 0.12 | SNP       |
| chr8_32557962_A_G    | 32557962  | 0.6 | 0.4 | 0.9 | 0.00805 | 0.27 | 0.20 | 0.28 | SNP       |
| chr8_32442703_G_C    | 32442703  | 0.3 | 0.1 | 0.7 | 0.00808 | 0.05 | 0.02 | 0.06 | SNP       |
| chr8_32522703_T_G    | 32522703  | 0.6 | 0.4 | 0.9 | 0.00814 | 0.40 | 0.32 | 0.41 | SNP       |
| chr8_29911061_T_C    | 29911061  | 0.6 | 0.5 | 0.9 | 0.00815 | 0.40 | 0.37 | 0.40 | SNP       |
| chr8_31238297_T_C    | 31238297  | 1.7 | 1.1 | 2.4 | 0.00831 | 0.35 | 0.38 | 0.34 | SNP       |
| xHLA_2Hdb_D8B1_13_02 | 32546552  | 0.3 | 0.1 | 0.7 | 0.00837 | 0.06 | 0.02 | 0.06 | HLA (HLA) |
| chr8_30879436_C_C    | 30879436  | 2.4 | 1.2 | 4.5 | 0.00841 | 0.11 | 0.13 | 0.11 | SNP       |
| chr8_29911037_G_C    | 29911037  | 0.6 | 0.5 | 0.9 | 0.00843 | 0.45 | 0.42 | 0.46 | SNP       |
| chr8_32169621_T_A    | 32169621  | 0.7 | 0.5 | 0.9 | 0.00843 | 0.47 | 0.41 | 0.48 | SNP       |
| chr8_32406330_G_A    | 32406330  | 1.6 | 1.1 | 2.2 | 0.00845 | 0.35 | 0.47 | 0.34 | SNP       |
| chr8_32553662_A_G    | 32553662  | 0.6 | 0.4 | 0.9 | 0.00855 | 0.39 | 0.30 | 0.40 | SNP       |
| chr8_32193945_G_T    | 32193945  | 0.6 | 0.4 | 0.9 | 0.00857 | 0.17 | 0.11 | 0.17 | SNP       |
| chr8_32628843_C_T    | 32628843  | 0.3 | 0.1 | 0.7 | 0.00869 | 0.05 | 0.02 | 0.06 | SNP       |
| chr8_29953750_G_A    | 29953750  | 1.7 | 1.1 | 2.6 | 0.00869 | 0.14 | 0.17 | 0.14 | SNP       |
| chr8_32611373_A_G    | 32611373  | 0.6 | 0.4 | 0.9 | 0.00870 | 0.50 | 0.39 | 0.51 | SNP       |
| chr8_31464571_T_C    | 31464571  | 1.6 | 1.1 | 2.3 | 0.00874 | 0.29 | 0.34 | 0.28 | SNP       |
| chr8_31236854_T_C    | 31236854  | 2.0 | 1.2 | 3.3 | 0.00875 | 0.14 | 0.16 | 0.14 | SNP       |
| chr8_32408527_C_G    | 32408527  | 1.5 | 1.1 | 2.1 | 0.00878 | 0.35 | 0.47 | 0.34 | SNP       |
| chr8_32270222_C_A    | 32270222  | 0.3 | 0.1 | 0.6 | 0.00883 | 0.05 | 0.01 | 0.05 | SNP       |
| chr8_31236523_G_A    | 31236523  | 1.7 | 1.1 | 2.4 | 0.00884 | 0.35 | 0.39 | 0.35 | SNP       |
| chr8_32607224_C_T    | 32607224  | 0.4 | 0.2 | 0.7 | 0.00884 | 0.10 | 0.04 | 0.11 | SNP       |

|                      |          |     |     |     |         |      |      |      |           |
|----------------------|----------|-----|-----|-----|---------|------|------|------|-----------|
| chr6_32785284_T_C    | 32785284 | 0.5 | 0.3 | 0.8 | 0.01090 | 0.10 | 0.05 | 0.10 | SNP       |
| chr6_31325241_C_G    | 31325241 | 1.7 | 1.1 | 2.5 | 0.01091 | 0.32 | 0.36 | 0.32 | SNP       |
| chr6_32261940_G_C    | 32261940 | 0.3 | 0.1 | 0.7 | 0.01099 | 0.05 | 0.02 | 0.05 | SNP       |
| chr6_32943345_T_C    | 32943345 | 0.7 | 0.5 | 0.9 | 0.01101 | 0.46 | 0.38 | 0.46 | SNP       |
| chr6_32405841_T_C    | 32405841 | 0.2 | 0.1 | 0.4 | 0.01103 | 0.48 | 0.39 | 0.49 | SNP       |
| chr6_29695180_G_A    | 29695180 | 1.5 | 1.1 | 2.1 | 0.01112 | 0.23 | 0.27 | 0.22 | SNP       |
| chr6_31633689_C_T    | 31633689 | 1.6 | 1.1 | 2.3 | 0.01118 | 0.18 | 0.22 | 0.18 | SNP       |
| chr6_31237802_G_A    | 31237802 | 1.6 | 1.1 | 2.4 | 0.01118 | 0.35 | 0.38 | 0.35 | SNP       |
| chr6_32559076_A_G    | 32559076 | 0.6 | 0.4 | 0.9 | 0.01119 | 0.34 | 0.25 | 0.35 | SNP       |
| chr6_31238230_C_G    | 31238230 | 1.6 | 1.1 | 2.4 | 0.01124 | 0.35 | 0.38 | 0.34 | SNP       |
| chr6_29911207_G_A    | 29911207 | 0.7 | 0.5 | 0.9 | 0.01125 | 0.41 | 0.39 | 0.41 | SNP       |
| chr6_31382932_G_A    | 31382932 | 1.3 | 1.1 | 2.1 | 0.01126 | 0.23 | 0.24 | 0.23 | SNP       |
| chr6_32373698_G_T    | 32373698 | 1.5 | 1.1 | 2.1 | 0.01130 | 0.37 | 0.49 | 0.36 | SNP       |
| chr6_31237463_G_C    | 31237463 | 1.6 | 1.1 | 2.4 | 0.01130 | 0.34 | 0.38 | 0.34 | SNP       |
| chr6_32020238_A_G    | 32020238 | 2.0 | 1.1 | 3.3 | 0.01132 | 0.17 | 0.22 | 0.16 | SNP       |
| chr6_29895644_G_A    | 29895644 | 0.7 | 0.5 | 0.9 | 0.01137 | 0.45 | 0.43 | 0.45 | SNP       |
| chr6_31325494_C_T    | 31325494 | 1.7 | 1.1 | 2.5 | 0.01138 | 0.33 | 0.36 | 0.32 | SNP       |
| chr6_32409305_A_G    | 32409305 | 1.5 | 1.1 | 2.1 | 0.01154 | 0.39 | 0.51 | 0.38 | SNP       |
| chr6_32607251_T_C    | 32607251 | 0.6 | 0.4 | 0.9 | 0.01155 | 0.38 | 0.29 | 0.38 | SNP       |
| xHLA_2F6L_DRB1_13_01 | 32546552 | 0.4 | 0.2 | 0.8 | 0.01160 | 0.09 | 0.03 | 0.09 | HLA (HLA) |
| chr6_29893922_A_T    | 29893922 | 1.6 | 1.1 | 2.2 | 0.01165 | 0.20 | 0.23 | 0.20 | SNP       |
| chr6_31466547_C_T    | 31466547 | 1.6 | 1.1 | 2.4 | 0.01174 | 0.29 | 0.34 | 0.28 | SNP       |
| chr6_32036357_G_A    | 32036357 | 0.5 | 0.2 | 0.8 | 0.01176 | 0.10 | 0.04 | 0.10 | SNP       |
| chr6_32011316_G_T    | 32011316 | 0.2 | 0.1 | 0.6 | 0.01181 | 0.07 | 0.01 | 0.07 | SNP       |
| chr6_29716169_G_T    | 29716169 | 2.4 | 1.2 | 4.5 | 0.01187 | 0.02 | 0.05 | 0.02 | SNP       |
| chr6_33036900_C_G    | 33036900 | 0.3 | 0.1 | 0.7 | 0.01192 | 0.05 | 0.02 | 0.06 | SNP       |
| chr6_31325513_G_C    | 31325513 | 1.7 | 1.1 | 2.5 | 0.01203 | 0.33 | 0.36 | 0.32 | SNP       |
| chr6_29908804_G_A    | 29908804 | 0.7 | 0.5 | 0.9 | 0.01214 | 0.41 | 0.39 | 0.41 | SNP       |
| chr6_29913744_C_T    | 29913744 | 0.9 | 0.5 | 1.3 | 0.01218 | 0.40 | 0.39 | 0.41 | SNP       |
| chr6_31473844_C_T    | 31473844 | 1.6 | 1.1 | 2.2 | 0.01219 | 0.29 | 0.34 | 0.29 | SNP       |
| chr6_31238535_C_T    | 31238535 | 1.6 | 1.1 | 2.4 | 0.01223 | 0.36 | 0.39 | 0.36 | SNP       |
| chr6_32021130_C_T    | 32021130 | 2.0 | 1.1 | 3.3 | 0.01225 | 0.06 | 0.07 | 0.06 | SNP       |
| chr6_33096001_C_A    | 33096001 | 2.8 | 1.2 | 4.0 | 0.01225 | 0.12 | 0.13 | 0.12 | SNP       |
| chr6_29892107_C_T    | 29892107 | 1.5 | 1.1 | 2.1 | 0.01230 | 0.21 | 0.24 | 0.20 | SNP       |
| chr6_31918860_A_G    | 31918860 | 2.7 | 1.2 | 5.8 | 0.01231 | 0.12 | 0.12 | 0.12 | SNP       |
| chr6_29891139_G_C    | 29891139 | 1.3 | 1.1 | 2.1 | 0.01241 | 0.21 | 0.24 | 0.21 | SNP       |
| chr6_31325504_C_T    | 31325504 | 1.7 | 1.1 | 2.5 | 0.01241 | 0.33 | 0.36 | 0.32 | SNP       |
| chr6_31325380_T_C    | 31325380 | 1.7 | 1.1 | 2.5 | 0.01248 | 0.33 | 0.36 | 0.32 | SNP       |
| chr6_31278574_T_C    | 31278574 | 1.6 | 1.1 | 2.4 | 0.01251 | 0.11 | 0.14 | 0.21 | SNP       |
| chr6_32011317_C_C    | 32011317 | 0.2 | 0.1 | 0.6 | 0.01257 | 0.07 | 0.01 | 0.07 | SNP       |
| chr6_32029183_C_T    | 32029183 | 0.5 | 0.2 | 0.8 | 0.01258 | 0.09 | 0.04 | 0.10 | SNP       |
| chr6_29908469_T_C    | 29908469 | 0.7 | 0.5 | 0.9 | 0.01259 | 0.41 | 0.39 | 0.41 | SNP       |
| chr6_32605050_G_C    | 32605050 | 0.3 | 0.1 | 0.7 | 0.01262 | 0.37 | 0.50 | 0.26 | SNP       |
| chr6_29859054_C_G    | 29859054 | 0.7 | 0.5 | 0.9 | 0.01271 | 0.47 | 0.45 | 0.47 | SNP       |
| chr6_31276253_T_C    | 31276253 | 2.8 | 1.2 | 6.2 | 0.01273 | 0.12 | 0.11 | 0.12 | SNP       |
| chr6_29910371_C_G    | 29910371 | 1.5 | 1.1 | 2.1 | 0.01274 | 0.18 | 0.17 | 0.18 | SNP       |
| chr6_32605501_C_G    | 32605501 | 1.5 | 1.1 | 2.1 | 0.01286 | 0.36 | 0.49 | 0.35 | SNP       |
| chr6_32526702_C_T    | 32526702 | 0.4 | 0.2 | 0.8 | 0.01292 | 0.08 | 0.04 | 0.09 | SNP       |
| chr6_32407709_C_A    | 32407709 | 1.5 | 1.1 | 2.1 | 0.01309 | 0.35 | 0.47 | 0.34 | SNP       |
| chr6_30864278_C_T    | 30864278 | 2.2 | 1.2 | 4.0 | 0.01315 | 0.11 | 0.13 | 0.11 | SNP       |
| chr6_31322522_C_A    | 31322522 | 0.6 | 0.4 | 0.9 | 0.01318 | 0.17 | 0.14 | 0.17 | SNP       |
| chr6_32171683_T_C    | 32171683 | 0.7 | 0.5 | 0.9 | 0.01319 | 0.47 | 0.41 | 0.47 | SNP       |
| chr6_29908067_G_A    | 29908067 | 0.5 | 0.3 | 0.8 | 0.01330 | 0.40 | 0.39 | 0.41 | SNP       |
| chr6_32783365_T_C    | 32783365 | 0.5 | 0.3 | 0.8 | 0.01339 | 0.10 | 0.05 | 0.10 | SNP       |
| chr6_31325116_T_G    | 31325116 | 1.7 | 1.1 | 2.5 | 0.01351 | 0.34 | 0.37 | 0.33 | SNP       |
| chr6_29914011_G_C    | 29914011 | 0.9 | 0.5 | 1.3 | 0.01368 | 0.40 | 0.38 | 0.40 | SNP       |
| chr6_31657701_C_A    | 31657701 | 1.6 | 1.1 | 2.3 | 0.01369 | 0.14 | 0.21 | 0.14 | SNP       |
| chr6_29892229_T_G    | 29892229 | 1.5 | 1.1 | 2.1 | 0.01390 | 0.25 | 0.28 | 0.25 | SNP       |
| chr6_3141646_G_C     | 3141646  | 0.7 | 0.5 | 0.9 | 0.01394 | 0.47 | 0.39 | 0.48 | SNP       |
| chr6_32192617_T_C    | 32192617 | 0.7 | 0.5 | 0.9 | 0.01395 | 0.05 | 0.02 | 0.06 | SNP       |
| chr6_31237660_G_A    | 31237660 | 1.6 | 1.1 | 2.4 | 0.01401 | 0.35 | 0.38 | 0.35 | SNP       |
| chr6_31248169_C_T    | 31248169 | 2.0 | 1.1 | 3.4 | 0.01408 | 0.14 | 0.15 | 0.14 | SNP       |
| chr6_32412539_G_C    | 32412539 | 0.7 | 0.5 | 0.9 | 0.01408 | 0.27 | 0.39 | 0.48 | SNP       |
| chr6_33036717_C_G    | 33036717 | 0.6 | 0.4 | 0.9 | 0.01413 | 0.14 | 0.08 | 0.15 | SNP       |
| chr6_32412398_T_C    | 32412398 | 0.7 | 0.5 | 0.9 | 0.01422 | 0.47 | 0.39 | 0.48 | SNP       |
| chr6_29909044_G_C    | 29909044 | 0.7 | 0.5 | 0.9 | 0.01427 | 0.40 | 0.39 | 0.40 | SNP       |
| chr6_31433407_A_G    | 31433407 | 0.5 | 0.2 | 0.8 | 0.01437 | 0.09 | 0.04 | 0.10 | SNP       |
| chr6_31321327_A_G    | 31321327 | 0.6 | 0.5 | 0.9 | 0.01446 | 0.24 | 0.18 | 0.24 | SNP       |
| chr6_31474688_G_T    | 31474688 | 1.6 | 1.1 | 2.2 | 0.01447 | 0.29 | 0.34 | 0.29 | SNP       |
| chr6_29638424_A_G    | 29638424 | 0.4 | 0.2 | 0.7 | 0.01453 | 0.15 | 0.10 | 0.15 | SNP       |
| xHLA_2F6L_DQB1_02_01 | 32627244 | 2.2 | 1.1 | 4.0 | 0.01452 | 0.13 | 0.15 | 0.12 | HLA (HLA) |
| chr6_32785029_T_C    | 32785029 | 0.5 | 0.3 | 0.8 | 0.01456 | 0.10 | 0.05 | 0.10 | SNP       |
| chr6_33053352_C_G    | 33053352 | 0.1 | 0.4 | 0.9 | 0.01464 | 0.21 | 0.16 | 0.22 | SNP       |
| chr6_33036708_C_T    | 33036708 | 0.6 | 0.4 | 0.9 | 0.01465 | 0.14 | 0.08 | 0.15 | SNP       |
| chr6_33036709_G_C    | 33036709 | 0.6 | 0.4 | 0.9 | 0.01465 | 0.14 | 0.08 | 0.15 | SNP       |
| chr6_32339498_C_G    | 32339498 | 0.3 | 0.1 | 0.7 | 0.01482 | 0.05 | 0.02 | 0.05 | SNP       |
| chr6_31325532_A_G    | 31325532 | 1.6 | 1.1 | 2.5 | 0.01485 | 0.33 | 0.36 | 0.32 | SNP       |
| chr6_31463621_G_A    | 31463621 | 1.6 | 1.1 | 2.2 | 0.01494 | 0.29 | 0.34 | 0.29 | SNP       |
| chr6_32785035_A_G    | 32785035 | 0.5 | 0.3 | 0.8 | 0.01494 | 0.10 | 0.05 | 0.10 | SNP       |
| chr6_32628098_G_C    | 32628098 | 0.7 | 0.5 | 0.9 | 0.01502 | 0.05 | 0.02 | 0.05 | SNP       |
| chr6_32013500_T_C    | 32013500 | 0.5 | 0.2 | 0.8 | 0.01511 | 0.10 | 0.05 | 0.10 | SNP       |
| chr6_29913912_C_T    | 29913912 | 0.7 | 0.5 | 0.9 | 0.01516 | 0.40 | 0.39 | 0.40 | SNP       |
| chr6_32946133_T_C    | 32946133 | 1.4 | 1.1 | 1.9 | 0.01517 | 0.42 | 0.51 | 0.41 | SNP       |
| chr6_31325526_A_G    | 31325526 | 1.6 | 1.1 | 2.4 | 0.01518 | 0.33 | 0.36 | 0.32 | SNP       |
| chr6_31325529_C_T    | 31325529 | 1.6 | 1.1 | 2.4 | 0.01518 | 0.33 | 0.36 | 0.32 | SNP       |
| chr6_31325521_C_G    | 31325521 | 1.6 | 1.1 | 2.4 | 0.01521 | 0.33 | 0.36 | 0.32 | SNP       |
| chr6_29712178_G_A    | 29712178 | 2.4 | 1.1 | 4.7 | 0.01543 | 0.02 | 0.05 | 0.02 | SNP       |
| chr6_29893235_C_T    | 29893235 | 0.7 | 0.5 | 0.9 | 0.01551 | 0.45 | 0.43 | 0.45 | SNP       |
| chr6_31592820_C_T    | 31592820 | 0.7 | 0.5 | 0.9 | 0.01552 | 0.34 | 0.31 | 0.34 | SNP       |
| chr6_29892233_T_C    | 29892233 | 1.5 | 1.1 | 2.0 | 0.01559 | 0.25 | 0.28 | 0.25 | SNP       |
| chr6_32412480_A_G    | 32412480 | 0.7 | 0.5 | 0.9 | 0.01578 | 0.47 | 0.39 | 0.44 | SNP       |
| chr6_29901898_C_G    | 29901898 | 0.7 | 0.5 | 0.9 | 0.01580 | 0.44 | 0.43 | 0.44 | SNP       |
| chr6_31321425_G_A    | 31321425 | 0.6 | 0.4 | 0.9 | 0.01585 | 0.21 | 0.17 | 0.21 | SNP       |
| chr6_29893403_C_G    | 29893403 | 1.6 | 1.1 | 2.5 | 0.01604 | 0.15 | 0.17 | 0.15 | SNP       |
| chr6_32812528_C_T    | 32812528 | 1.5 | 1.1 | 2.0 | 0.01621 | 0.16 | 0.21 | 0.16 | SNP       |
| chr6_31369151_G_A    | 31369151 | 0.7 | 0.5 | 0.9 | 0.01623 | 0.34 | 0.30 | 0.34 | SNP       |
| chr6_29896659_C_T    | 29896659 | 0.7 | 0.5 | 0.9 | 0.01636 | 0.45 | 0.43 | 0.45 | SNP       |
| chr6_32948426_C_G    | 32948426 | 0.5 | 0.3 | 0.9 | 0.01636 | 0.09 | 0.06 | 0.10 | SNP       |
| chr6_30524614_A_G    | 30524614 | 2.5 | 1.1 | 5.0 | 0.01652 | 0.02 | 0.04 | 0.02 | SNP       |
| chr6_32066095_T_C    | 32066095 | 0.5 | 0.3 | 0.9 | 0.01665 | 0.11 | 0.06 | 0.12 | SNP       |
| chr6_31731014_C_G    | 31731014 | 1.5 | 1.1 | 2.1 | 0.01665 | 0.17 | 0.21 | 0.17 | SNP       |
| chr6_29908426_C_T    | 29908426 | 0.7 | 0.5 | 0.9 | 0.01700 | 0.40 | 0.39 | 0.41 | SNP       |
| chr6_29713155_G_C    | 29713155 | 1.7 | 1.1 | 2.5 | 0.01712 | 0.09 | 0.13 | 0.09 | SNP       |
| chr6_31343990_G_T    | 31343990 | 0.5 | 0.2 | 0.8 | 0.01714 | 0.09 | 0.04 | 0.09 | SNP       |
| chr6_32029431_G_A    | 32029431 | 2.0 | 1.1 | 3.4 | 0.01725 | 0.06 | 0.07 | 0.06 | SNP       |
| chr6_29896120_G_T    | 29896120 | 0.7 | 0.5 | 0.9 | 0.01727 | 0.48 | 0.47 | 0.48 | SNP       |
| chr6_3126629_T_C     | 3126629  | 1.6 | 1.1 | 2.3 | 0.01728 | 0.34 | 0.37 | 0.34 | SNP       |
| chr6_29894960_C_G    | 29894960 | 1.5 | 1.1 | 2.0 | 0.01728 | 0.23 | 0.27 | 0.23 | SNP       |
| chr6_29693938_G_A    | 29693938 | 0.6 | 0.4 | 0.9 | 0.01739 | 0.15 | 0.10 | 0.15 | SNP       |
| chr6_31542308_T_C    | 31542308 | 0.6 | 0.4 | 0.9 | 0.01742 | 0.19 | 0.16 | 0.19 | SNP       |
| chr6_29691857_C_G    | 29691857 | 0.7 | 0.5 | 0.9 | 0.01777 | 0.46 | 0.42 | 0.46 | SNP       |
| chr6_31473546_G_A    | 31473546 | 1.6 | 1.1 | 2.2 | 0.01790 | 0.29 | 0.33 | 0.28 | SNP       |
| chr6_32303848_G_A    | 32303848 | 1.6 | 1.1 | 2.3 | 0.01792 | 0.24 | 0.34 | 0.23 | SNP       |
| chr6_32604212_A_C    | 32604212 | 0.6 | 0.4 | 0.9 | 0.01807 | 0.40 | 0.31 | 0.41 | SNP       |
| chr6_32491581_A_G    | 32491581 | 1.6 | 1.1 | 2.3 | 0.01821 | 0.26 | 0.38 | 0.25 | SNP       |

|                   |          |     |     |     |         |      |      |      |     |
|-------------------|----------|-----|-----|-----|---------|------|------|------|-----|
| chr6_31508854_T_C | 31508854 | 1.6 | 1.1 | 2.4 | 0.02226 | 0.23 | 0.29 | 0.23 | SNP |
| chr6_31409060_G_A | 31409060 | 0.6 | 0.4 | 0.9 | 0.02236 | 0.22 | 0.16 | 0.23 | SNP |
| chr6_31924880_G_A | 31924880 | 0.5 | 0.2 | 0.9 | 0.02245 | 0.09 | 0.04 | 0.09 | SNP |
| chr6_29855401_C_G | 29855401 | 0.7 | 0.5 | 1.0 | 0.02247 | 0.43 | 0.41 | 0.43 | SNP |
| chr6_31262020_A_G | 31262020 | 1.5 | 1.1 | 2.0 | 0.02278 | 1.5  | 1.1  | 0.38 | SNP |
| chr6_32550591_G_A | 32550591 | 0.4 | 0.1 | 0.8 | 0.02313 | 0.06 | 0.03 | 0.06 | SNP |
| chr6_33045698_G_A | 33045698 | 0.3 | 0.1 | 0.7 | 0.02318 | 0.04 | 0.01 | 0.05 | SNP |
| chr6_31930351_A_G | 31930351 | 0.4 | 0.1 | 0.8 | 0.02333 | 0.05 | 0.02 | 0.05 | SNP |
| chr6_31931177_C_T | 31931177 | 0.5 | 0.3 | 0.9 | 0.02353 | 0.12 | 0.06 | 0.12 | SNP |
| chr6_29856774_A_G | 29856774 | 1.6 | 1.1 | 2.4 | 0.02364 | 0.14 | 0.17 | 0.14 | SNP |
| chr6_29908659_T_C | 29908659 | 0.7 | 0.5 | 1.0 | 0.02380 | 0.43 | 0.42 | 0.43 | SNP |
| chr6_31462135_G_A | 31462135 | 2.7 | 1.1 | 6.2 | 0.02385 | 0.12 | 0.13 | 0.12 | SNP |
| chr6_31556581_T_A | 31556581 | 0.7 | 0.5 | 0.9 | 0.02414 | 0.24 | 0.21 | 0.24 | SNP |
| chr6_32818432_C_A | 32818432 | 0.3 | 0.1 | 0.7 | 0.02430 | 0.04 | 0.01 | 0.04 | SNP |
| chr6_31925921_G_A | 31925921 | 0.3 | 0.1 | 0.8 | 0.02434 | 0.04 | 0.01 | 0.04 | SNP |
| chr6_31919956_C_T | 31919956 | 0.5 | 0.2 | 0.9 | 0.02442 | 0.09 | 0.04 | 0.09 | SNP |
| chr6_32725271_G_A | 32725271 | 0.6 | 0.4 | 0.9 | 0.02444 | 0.21 | 0.15 | 0.22 | SNP |
| chr6_31709814_G_C | 31709814 | 0.5 | 0.3 | 0.9 | 0.02454 | 0.06 | 0.06 | 0.06 | SNP |
| chr6_31910938_G_C | 31910938 | 0.5 | 0.2 | 0.9 | 0.02461 | 0.09 | 0.04 | 0.09 | SNP |
| chr6_31916951_T_C | 31916951 | 0.5 | 0.2 | 0.9 | 0.02461 | 0.09 | 0.04 | 0.09 | SNP |
| chr6_31919917_T_C | 31919917 | 0.5 | 0.2 | 0.9 | 0.02461 | 0.09 | 0.04 | 0.09 | SNP |
| chr6_31441100_C_A | 31441100 | 0.6 | 0.4 | 0.9 | 0.02462 | 0.28 | 0.23 | 0.28 | SNP |
| chr6_31910929_G_A | 31910929 | 0.5 | 0.2 | 0.9 | 0.02474 | 0.09 | 0.04 | 0.09 | SNP |
| chr6_31464325_C_T | 31464325 | 0.7 | 0.5 | 0.9 | 0.02481 | 0.30 | 0.22 | 0.30 | SNP |
| chr6_31322303_C_G | 31322303 | 0.7 | 0.5 | 1.0 | 0.02485 | 0.34 | 0.29 | 0.35 | SNP |
| chr6_31921009_G_C | 31921009 | 2.0 | 1.1 | 3.5 | 0.02496 | 0.05 | 0.05 | 0.05 | SNP |
| chr6_29796103_T_C | 29796103 | 1.5 | 1.0 | 2.0 | 0.02501 | 0.44 | 0.48 | 0.43 | SNP |
| chr6_31928306_A_G | 31928306 | 0.5 | 0.2 | 0.9 | 0.02504 | 0.09 | 0.04 | 0.09 | SNP |
| chr6_31929290_G_C | 31929290 | 1.6 | 1.1 | 2.4 | 0.02506 | 0.24 | 0.17 | 0.23 | SNP |
| chr6_32605861_A_G | 32605861 | 0.5 | 0.2 | 0.9 | 0.02507 | 0.08 | 0.04 | 0.09 | SNP |
| chr6_32035427_T_C | 32035427 | 0.5 | 0.2 | 0.9 | 0.02511 | 0.10 | 0.05 | 0.10 | SNP |
| chr6_32341353_G_A | 32341353 | 1.4 | 1.0 | 2.0 | 0.02526 | 0.47 | 0.55 | 0.46 | SNP |
| chr6_32782038_C_T | 32782038 | 0.5 | 0.3 | 0.9 | 0.02539 | 0.10 | 0.06 | 0.10 | SNP |
| chr6_32603405_C_T | 32603405 | 0.5 | 0.2 | 0.9 | 0.02546 | 0.08 | 0.04 | 0.09 | SNP |
| chr6_32605950_C_T | 32605950 | 0.5 | 0.2 | 0.9 | 0.02546 | 0.08 | 0.04 | 0.09 | SNP |
| chr6_32606900_A_T | 32606900 | 0.6 | 0.4 | 0.9 | 0.02546 | 0.08 | 0.04 | 0.09 | SNP |
| chr6_31380449_C_T | 31380449 | 1.5 | 1.1 | 2.2 | 0.02554 | 0.34 | 0.35 | 0.34 | SNP |
| chr6_32024234_G_C | 32024234 | 3.2 | 1.0 | 8.2 | 0.02556 | 0.01 | 0.02 | 0.01 | SNP |
| chr6_32170835_T_C | 32170835 | 1.0 | 0.7 | 1.4 | 0.02558 | 0.37 | 0.48 | 0.36 | SNP |
| chr6_29895604_C_G | 29895604 | 0.7 | 0.6 | 1.0 | 0.02564 | 0.45 | 0.45 | 0.45 | SNP |
| chr6_32409781_C_T | 32409781 | 1.5 | 1.0 | 2.0 | 0.02586 | 0.39 | 0.50 | 0.38 | SNP |
| chr6_31795345_G_A | 31795345 | 0.3 | 0.1 | 0.8 | 0.02601 | 0.04 | 0.01 | 0.04 | SNP |
| chr6_32606742_G_C | 32606742 | 0.5 | 0.2 | 0.9 | 0.02612 | 0.08 | 0.04 | 0.09 | SNP |
| chr6_32604384_G_A | 32604384 | 0.5 | 0.2 | 0.9 | 0.02619 | 0.08 | 0.04 | 0.09 | SNP |
| chr6_32376882_T_G | 32376882 | 1.5 | 1.0 | 2.1 | 0.02625 | 0.48 | 0.55 | 0.47 | SNP |
| chr6_31239430_C_T | 31239430 | 0.7 | 0.4 | 1.0 | 0.02630 | 0.47 | 0.44 | 0.48 | SNP |
| chr6_33036401_C_T | 33036401 | 0.6 | 0.4 | 0.9 | 0.02632 | 0.15 | 0.09 | 0.15 | SNP |
| chr6_29858840_A_C | 29858840 | 1.6 | 1.0 | 2.4 | 0.02670 | 0.15 | 0.17 | 0.14 | SNP |
| chr6_29893293_A_G | 29893293 | 1.4 | 1.0 | 1.8 | 0.02691 | 0.47 | 0.48 | 0.47 | SNP |
| chr6_31406976_T_C | 31406976 | 0.5 | 0.2 | 0.9 | 0.02708 | 0.08 | 0.04 | 0.09 | SNP |
| chr6_31382938_G_A | 31382938 | 1.4 | 1.0 | 2.0 | 0.02727 | 0.23 | 0.23 | 0.23 | SNP |
| chr6_31382942_G_C | 31382942 | 1.4 | 1.0 | 2.0 | 0.02727 | 0.23 | 0.23 | 0.23 | SNP |
| chr6_31593476_A_G | 31593476 | 0.7 | 0.5 | 1.0 | 0.02741 | 0.33 | 0.31 | 0.33 | SNP |
| chr6_31378387_T_C | 31378387 | 1.5 | 1.0 | 2.0 | 0.02741 | 0.24 | 0.24 | 0.24 | SNP |
| chr6_31382994_C_A | 31382994 | 1.5 | 1.0 | 2.1 | 0.02767 | 0.18 | 0.18 | 0.18 | SNP |
| chr6_29942527_T_C | 29942527 | 1.5 | 1.0 | 2.1 | 0.02773 | 0.07 | 0.05 | 0.07 | SNP |
| chr6_32029205_G_A | 32029205 | 2.5 | 1.1 | 5.6 | 0.02779 | 0.12 | 0.12 | 0.12 | SNP |
| chr6_32608425_C_A | 32608425 | 0.5 | 0.2 | 0.9 | 0.02780 | 0.08 | 0.04 | 0.09 | SNP |
| chr6_31320176_C_T | 31320176 | 0.6 | 0.4 | 0.9 | 0.02804 | 0.18 | 0.15 | 0.19 | SNP |
| chr6_32996115_A_G | 32996115 | 1.4 | 1.0 | 1.9 | 0.02807 | 0.43 | 0.46 | 0.43 | SNP |
| chr6_31323233_A_G | 31323233 | 0.7 | 0.5 | 1.0 | 0.02811 | 0.36 | 0.34 | 0.37 | SNP |
| chr6_31239827_T_C | 31239827 | 1.6 | 1.0 | 2.4 | 0.02817 | 0.37 | 0.40 | 0.37 | SNP |
| chr6_31506524_C_T | 31506524 | 1.5 | 1.0 | 2.3 | 0.02820 | 0.23 | 0.21 | 0.23 | SNP |
| chr6_32376932_C_T | 32376932 | 1.5 | 1.0 | 2.1 | 0.02827 | 0.48 | 0.55 | 0.47 | SNP |
| chr6_32627700_A_G | 32627700 | 0.6 | 0.4 | 0.9 | 0.02830 | 0.20 | 0.12 | 0.20 | SNP |
| chr6_32607017_T_A | 32607017 | 0.5 | 0.3 | 0.9 | 0.02835 | 0.08 | 0.04 | 0.09 | SNP |
| chr6_31307865_G_A | 31307865 | 0.7 | 0.5 | 1.0 | 0.02876 | 0.33 | 0.31 | 0.34 | SNP |
| chr6_31590898_C_T | 31590898 | 0.7 | 0.5 | 1.0 | 0.02913 | 0.33 | 0.31 | 0.33 | SNP |
| chr6_29909071_G_A | 29909071 | 1.5 | 1.0 | 2.2 | 0.02914 | 0.19 | 0.21 | 0.18 | SNP |
| chr6_29908491_G_A | 29908491 | 1.5 | 1.0 | 2.2 | 0.02918 | 0.23 | 0.21 | 0.18 | SNP |
| chr6_32340176_C_T | 32340176 | 0.6 | 0.4 | 0.9 | 0.02928 | 0.24 | 0.17 | 0.24 | SNP |
| chr6_32412809_T_A | 32412809 | 0.6 | 0.4 | 0.9 | 0.02935 | 0.23 | 0.17 | 0.23 | SNP |
| chr6_29911684_C_T | 29911684 | 1.5 | 1.0 | 2.2 | 0.02938 | 0.19 | 0.21 | 0.18 | SNP |
| chr6_29913430_C_T | 29913430 | 1.5 | 1.0 | 2.2 | 0.02942 | 0.18 | 0.20 | 0.18 | SNP |
| chr6_32412592_G_A | 32412592 | 0.6 | 0.4 | 0.9 | 0.02949 | 0.23 | 0.17 | 0.23 | SNP |
| chr6_33054861_A_G | 33054861 | 0.7 | 0.5 | 1.0 | 0.02950 | 0.22 | 0.17 | 0.22 | SNP |
| chr6_32012755_G_A | 32012755 | 1.6 | 1.0 | 2.3 | 0.02958 | 0.08 | 0.04 | 0.09 | SNP |
| chr6_32556677_C_A | 32556677 | 1.6 | 1.0 | 2.5 | 0.02962 | 0.10 | 0.16 | 0.10 | SNP |
| chr6_32796793_G_A | 32796793 | 1.6 | 1.0 | 2.3 | 0.02962 | 0.09 | 0.14 | 0.09 | SNP |
| chr6_32400688_T_C | 32400688 | 0.7 | 0.5 | 1.0 | 0.02963 | 0.50 | 0.59 | 0.49 | SNP |
| chr6_32005649_A_G | 32005649 | 0.6 | 0.3 | 0.9 | 0.02970 | 0.11 | 0.06 | 0.11 | SNP |
| chr6_31931137_T_C | 31931137 | 0.6 | 0.3 | 0.9 | 0.02978 | 0.12 | 0.07 | 0.13 | SNP |
| chr6_32408772_C_G | 32408772 | 0.6 | 0.4 | 0.9 | 0.02995 | 0.24 | 0.18 | 0.24 | SNP |
| chr6_32410991_G_C | 32410991 | 0.4 | 0.1 | 0.8 | 0.02995 | 0.23 | 0.17 | 0.23 | SNP |
| chr6_33045659_T_C | 33045659 | 0.3 | 0.1 | 0.8 | 0.03017 | 0.04 | 0.01 | 0.04 | SNP |
| chr6_29892709_A_G | 29892709 | 0.7 | 0.6 | 1.0 | 0.03038 | 0.50 | 0.51 | 0.50 | SNP |
| chr6_31283236_C_G | 31283236 | 0.7 | 0.5 | 1.0 | 0.03043 | 0.38 | 0.44 | 0.38 | SNP |
| chr6_32819865_T_C | 32819865 | 0.6 | 0.4 | 0.9 | 0.03047 | 0.13 | 0.09 | 0.13 | SNP |
| chr6_33053942_T_C | 33053942 | 0.7 | 0.5 | 1.0 | 0.03051 | 0.22 | 0.17 | 0.22 | SNP |
| chr6_32411307_C_T | 32411307 | 0.6 | 0.4 | 0.9 | 0.03052 | 0.23 | 0.17 | 0.23 | SNP |
| chr6_32411566_T_A | 32411566 | 0.6 | 0.4 | 0.9 | 0.03052 | 0.23 | 0.17 | 0.23 | SNP |
| chr6_32709204_G_C | 32709204 | 0.6 | 0.4 | 0.9 | 0.03060 | 0.21 | 0.15 | 0.22 | SNP |
| chr6_29896112_C_T | 29896112 | 1.6 | 1.0 | 2.4 | 0.03066 | 0.16 | 0.18 | 0.15 | SNP |
| chr6_32944746_G_A | 32944746 | 1.3 | 1.0 | 1.9 | 0.03092 | 0.42 | 0.50 | 0.42 | SNP |
| chr6_33053812_G_C | 33053812 | 0.7 | 0.5 | 1.0 | 0.03131 | 0.22 | 0.17 | 0.22 | SNP |
| chr6_33036394_G_A | 33036394 | 0.6 | 0.4 | 0.9 | 0.03136 | 0.14 | 0.09 | 0.15 | SNP |
| chr6_3305396_A_G  | 3305396  | 0.7 | 0.5 | 1.0 | 0.03137 | 0.21 | 0.17 | 0.22 | SNP |
| chr6_31465637_C_T | 31465637 | 0.3 | 0.1 | 0.8 | 0.03148 | 0.05 | 0.05 | 0.05 | SNP |
| chr6_32559520_C_T | 32559520 | 1.4 | 1.0 | 2.0 | 0.03148 | 0.32 | 0.45 | 0.31 | SNP |
| chr6_31464321_T_A | 31464321 | 0.7 | 0.5 | 1.0 | 0.03157 | 0.30 | 0.23 | 0.30 | SNP |
| chr6_30878557_G_A | 30878557 | 0.5 | 0.3 | 0.9 | 0.03158 | 0.06 | 0.06 | 0.06 | SNP |
| chr6_31325792_G_A | 31325792 | 1.5 | 1.0 | 2.2 | 0.03176 | 0.36 | 0.39 | 0.35 | SNP |
| chr6_32409787_T_C | 32409787 | 1.4 | 1.0 | 2.0 | 0.03204 | 0.39 | 0.50 | 0.38 | SNP |
| chr6_32007063_C_T | 32007063 | 0.6 | 0.4 | 0.9 | 0.03211 | 0.27 | 0.20 | 0.27 | SNP |
| chr6_32611759_T_G | 32611759 | 0.5 | 0.3 | 0.9 | 0.03221 | 0.09 | 0.04 | 0.09 | SNP |
| chr6_33036617_C_T | 33036617 | 0.6 | 0.4 | 0.9 | 0.03225 | 0.15 | 0.09 | 0.15 | SNP |
| chr6_2991839_G_A  | 2991839  | 1.5 | 1.0 | 2.1 | 0.03227 | 0.19 | 0.21 | 0.18 | SNP |
| chr6_32192107_C_T | 32192107 | 0.6 | 0.4 | 0.9 | 0.03235 | 0.14 | 0.10 | 0.14 | SNP |
| chr6_29895929_C_G | 29895929 | 0.7 | 0.6 | 1.0 | 0.03237 | 0.48 | 0.46 | 0.48 | SNP |
| chr6_31466057_G_A | 31466057 | 0.3 | 0.1 | 0.8 | 0.03245 | 0.05 | 0.01 | 0.05 | SNP |
| chr6_31373174_C_T | 31373174 | 0.7 | 0.5 | 1.0 | 0.03275 | 0.16 | 0.13 | 0.16 | SNP |
| chr6_32557301_T_C | 32557301 | 0.3 | 0.1 | 0.8 | 0.03295 | 0.04 | 0.01 | 0.04 | SNP |
| chr6_32707585_G_A | 32707585 | 0.6 | 0.4 | 0.9 | 0.03306 | 0.21 | 0.15 | 0.22 | SNP |
| chr6_33033266_T_A | 33033266 | 0.6 | 0.4 | 0.9 | 0.03323 | 0.15 | 0.09 | 0.15 | SNP |
| chr6_31540429_G_C | 31540429 | 1.4 | 1.0 | 1.9 | 0.03337 | 0.38 | 0.44 | 0.37 | SNP |
| chr6_330366       |          |     |     |     |         |      |      |      |     |

|                   |          |     |     |     |         |      |      |      |     |
|-------------------|----------|-----|-----|-----|---------|------|------|------|-----|
| chr6_28692196_T_A | 28692196 | 1.4 | 1.0 | 1.8 | 0.03590 | 0.47 | 0.47 | 0.47 | SNP |
| chr6_32608934_A_T | 32608934 | 0.5 | 0.3 | 0.9 | 0.03593 | 0.09 | 0.04 | 0.09 | SNP |
| chr6_32306480_A_T | 32306480 | 0.5 | 0.2 | 0.9 | 0.03620 | 0.07 | 0.03 | 0.07 | SNP |
| chr6_31239681_T_A | 31239681 | 1.5 | 1.0 | 2.3 | 0.03622 | 0.41 | 0.46 | 0.40 | SNP |
| chr6_31239378_G_C | 31239378 | 1.0 | 0.9 | 1.0 | 0.03626 | 0.50 | 0.52 | 0.50 | SNP |
| chr6_32635605_G_A | 32635605 | 1.4 | 1.0 | 2.0 | 0.03640 | 0.31 | 0.38 | 0.30 | SNP |
| chr6_31379109_G_A | 31379109 | 1.4 | 1.0 | 2.0 | 0.03641 | 0.24 | 0.24 | 0.24 | SNP |
| chr6_32076499_G_C | 32076499 | 0.7 | 0.5 | 1.0 | 0.03647 | 0.36 | 0.35 | 0.36 | SNP |
| chr6_31506744_C_A | 31506744 | 1.5 | 1.0 | 2.3 | 0.03649 | 0.23 | 0.29 | 0.23 | SNP |
| chr6_29856693_C_T | 29856693 | 0.8 | 0.6 | 1.0 | 0.03652 | 0.45 | 0.44 | 0.45 | SNP |
| chr6_29912463_G_C | 29912463 | 1.4 | 1.0 | 1.8 | 0.03666 | 0.49 | 0.50 | 0.49 | SNP |
| chr6_29895469_G_C | 29895469 | 1.8 | 1.0 | 2.4 | 0.03671 | 0.14 | 0.16 | 0.14 | SNP |
| chr6_32609195_G_A | 32609195 | 0.5 | 0.3 | 0.9 | 0.03672 | 0.09 | 0.04 | 0.09 | SNP |
| chr6_31378425_A_G | 31378425 | 1.4 | 1.0 | 2.0 | 0.03688 | 0.24 | 0.24 | 0.24 | SNP |
| chr6_29897259_T_A | 29897259 | 0.8 | 0.6 | 1.0 | 0.03691 | 0.44 | 0.44 | 0.44 | SNP |
| chr6_33045839_C_T | 33045839 | 0.5 | 0.2 | 0.9 | 0.03692 | 0.06 | 0.03 | 0.07 | SNP |
| chr6_29896084_A_G | 29896084 | 0.8 | 0.6 | 1.0 | 0.03701 | 0.46 | 0.46 | 0.46 | SNP |
| chr6_31745464_G_C | 31745464 | 2.3 | 1.0 | 5.2 | 0.03715 | 0.12 | 0.12 | 0.12 | SNP |
| chr6_32191457_G_A | 32191457 | 0.7 | 0.5 | 1.0 | 0.03761 | 0.36 | 0.36 | 0.36 | SNP |
| chr6_31383187_A_G | 31383187 | 1.4 | 1.0 | 2.0 | 0.03726 | 0.23 | 0.23 | 0.23 | SNP |
| chr6_32611215_C_T | 32611215 | 0.5 | 0.3 | 0.9 | 0.03741 | 0.09 | 0.04 | 0.09 | SNP |
| chr6_32611709_T_C | 32611709 | 0.5 | 0.3 | 0.9 | 0.03741 | 0.09 | 0.04 | 0.09 | SNP |
| chr6_29759729_C_T | 29759729 | 2.0 | 1.0 | 3.6 | 0.03744 | 0.03 | 0.05 | 0.02 | SNP |
| chr6_29795113_C_G | 29795113 | 2.0 | 1.0 | 3.6 | 0.03746 | 0.03 | 0.05 | 0.02 | SNP |
| chr6_33033390_A_T | 33033390 | 0.6 | 0.4 | 0.9 | 0.03758 | 0.15 | 0.09 | 0.15 | SNP |
| chr6_29940943_T_C | 29940943 | 0.7 | 0.6 | 1.0 | 0.03761 | 0.36 | 0.36 | 0.36 | SNP |
| chr6_32339925_T_A | 32339925 | 1.3 | 1.0 | 1.8 | 0.03768 | 0.33 | 0.35 | 0.33 | SNP |
| chr6_32610688_G_C | 32610688 | 0.5 | 0.3 | 0.9 | 0.03768 | 0.09 | 0.04 | 0.09 | SNP |
| chr6_32408842_A_G | 32408842 | 1.6 | 1.0 | 2.4 | 0.03779 | 0.22 | 0.17 | 0.23 | SNP |
| chr6_33037560_G_A | 33037560 | 0.6 | 0.3 | 0.9 | 0.03794 | 0.12 | 0.07 | 0.12 | SNP |
| chr6_32610696_G_A | 32610696 | 0.5 | 0.3 | 0.9 | 0.03814 | 0.09 | 0.04 | 0.09 | SNP |
| chr6_33053468_G_C | 33053468 | 0.7 | 0.5 | 1.0 | 0.03820 | 0.27 | 0.22 | 0.28 | SNP |
| chr6_33130863_T_C | 33130863 | 2.2 | 1.0 | 4.6 | 0.03832 | 0.12 | 0.12 | 0.12 | SNP |
| chr6_31383108_T_C | 31383108 | 1.4 | 1.0 | 2.0 | 0.03846 | 0.23 | 0.23 | 0.23 | SNP |
| chr6_32411376_T_G | 32411376 | 0.6 | 0.4 | 1.0 | 0.03848 | 0.22 | 0.17 | 0.23 | SNP |
| chr6_32365505_G_C | 32365505 | 1.4 | 1.0 | 1.8 | 0.03855 | 0.15 | 0.09 | 0.15 | SNP |
| chr6_32193220_A_G | 32193220 | 0.7 | 0.5 | 1.0 | 0.03857 | 0.33 | 0.26 | 0.34 | SNP |
| chr6_32193698_A_T | 32193698 | 0.7 | 0.5 | 1.0 | 0.03857 | 0.33 | 0.26 | 0.34 | SNP |
| chr6_32192978_T_A | 32192978 | 1.6 | 1.0 | 2.4 | 0.03863 | 0.10 | 0.14 | 0.10 | SNP |
| chr6_29896108_A_T | 29896108 | 1.6 | 1.0 | 2.4 | 0.03871 | 0.15 | 0.17 | 0.15 | SNP |
| chr6_32610300_C_T | 32610300 | 0.5 | 0.3 | 0.9 | 0.03875 | 0.09 | 0.04 | 0.09 | SNP |
| chr6_31850813_T_C | 31850813 | 0.4 | 0.1 | 0.9 | 0.03888 | 0.05 | 0.02 | 0.05 | SNP |
| chr6_33045839_C_T | 33045839 | 0.5 | 0.2 | 0.9 | 0.03898 | 0.06 | 0.03 | 0.07 | SNP |
| chr6_33158020_C_T | 33158020 | 1.6 | 1.0 | 2.4 | 0.03921 | 0.12 | 0.14 | 0.12 | SNP |
| chr6_29896275_G_C | 29896275 | 0.7 | 0.6 | 1.0 | 0.03922 | 0.46 | 0.45 | 0.46 | SNP |
| chr6_32377116_C_G | 32377116 | 1.0 | 0.9 | 1.0 | 0.03928 | 0.48 | 0.54 | 0.47 | SNP |
| chr6_32005048_C_G | 32005048 | 0.4 | 0.1 | 0.9 | 0.03974 | 0.04 | 0.02 | 0.04 | SNP |
| chr6_32786516_C_T | 32786516 | 0.5 | 0.3 | 0.9 | 0.03984 | 0.08 | 0.04 | 0.08 | SNP |
| chr6_29909391_C_A | 29909391 | 1.6 | 1.0 | 2.4 | 0.03986 | 0.08 | 0.11 | 0.08 | SNP |
| chr6_29909409_C_T | 29909409 | 1.6 | 1.0 | 2.4 | 0.03986 | 0.08 | 0.11 | 0.08 | SNP |
| chr6_31508761_T_C | 31508761 | 1.5 | 1.0 | 2.3 | 0.03989 | 0.24 | 0.29 | 0.23 | SNP |
| chr6_32490708_C_A | 32490708 | 2.4 | 1.0 | 5.2 | 0.03993 | 0.02 | 0.03 | 0.01 | SNP |
| chr6_31657741_C_G | 31657741 | 1.0 | 1.0 | 1.0 | 0.04001 | 0.27 | 0.31 | 0.27 | SNP |
| chr6_31601735_G_A | 31601735 | 0.5 | 0.2 | 0.9 | 0.04006 | 0.06 | 0.03 | 0.06 | SNP |
| chr6_32608967_A_G | 32608967 | 0.5 | 0.3 | 0.9 | 0.04010 | 0.09 | 0.05 | 0.10 | SNP |
| chr6_29909426_T_C | 29909426 | 1.6 | 1.0 | 2.4 | 0.04012 | 0.08 | 0.11 | 0.08 | SNP |
| chr6_31383083_G_A | 31383083 | 1.4 | 1.0 | 2.0 | 0.04023 | 0.23 | 0.23 | 0.23 | SNP |
| chr6_32783406_G_A | 32783406 | 0.5 | 0.3 | 0.9 | 0.04026 | 0.08 | 0.04 | 0.08 | SNP |
| chr6_32783450_G_C | 32783450 | 0.5 | 0.3 | 0.9 | 0.04026 | 0.08 | 0.04 | 0.08 | SNP |
| chr6_31383077_T_C | 31383077 | 1.4 | 1.0 | 2.0 | 0.04026 | 0.23 | 0.23 | 0.23 | SNP |
| chr6_32409242_C_A | 32409242 | 0.7 | 0.5 | 1.0 | 0.04038 | 0.44 | 0.32 | 0.45 | SNP |
| chr6_33033235_G_C | 33033235 | 0.6 | 0.4 | 1.0 | 0.04043 | 0.15 | 0.09 | 0.15 | SNP |
| chr6_33077588_A_T | 33077588 | 1.9 | 1.0 | 1.5 | 0.04052 | 0.06 | 0.07 | 0.06 | SNP |
| chr6_32006791_G_A | 32006791 | 0.4 | 0.1 | 0.9 | 0.04053 | 0.04 | 0.02 | 0.04 | SNP |
| chr6_33037878_G_A | 33037878 | 0.6 | 0.4 | 1.0 | 0.04071 | 0.14 | 0.08 | 0.14 | SNP |
| chr6_31723088_C_T | 31723088 | 2.4 | 1.0 | 5.5 | 0.04105 | 0.01 | 0.03 | 0.01 | SNP |
| chr6_31322047_A_G | 31322047 | 0.7 | 0.4 | 1.0 | 0.04108 | 0.15 | 0.14 | 0.16 | SNP |
| chr6_29895945_A_T | 29895945 | 2.6 | 0.9 | 6.2 | 0.04135 | 0.01 | 0.02 | 0.01 | SNP |
| chr6_33045835_A_G | 33045835 | 0.5 | 0.2 | 0.9 | 0.04145 | 0.06 | 0.03 | 0.07 | SNP |
| chr6_31925567_G_C | 31925567 | 1.6 | 1.0 | 2.4 | 0.04172 | 0.05 | 0.02 | 0.05 | SNP |
| chr6_31708910_T_C | 31708910 | 0.6 | 0.3 | 1.0 | 0.04181 | 0.07 | 0.07 | 0.07 | SNP |
| chr6_32725832_A_G | 32725832 | 0.6 | 0.4 | 1.0 | 0.04187 | 0.21 | 0.14 | 0.21 | SNP |
| chr6_32005664_C_T | 32005664 | 1.8 | 1.0 | 3.1 | 0.04196 | 0.06 | 0.06 | 0.06 | SNP |
| chr6_32635629_G_A | 32635629 | 1.6 | 1.0 | 2.3 | 0.04213 | 0.22 | 0.29 | 0.22 | SNP |
| chr6_32192331_G_A | 32192331 | 1.4 | 1.0 | 1.9 | 0.04215 | 0.47 | 0.57 | 0.46 | SNP |
| chr6_31542476_C_A | 31542476 | 0.7 | 0.5 | 1.0 | 0.04226 | 0.16 | 0.14 | 0.16 | SNP |
| chr6_29858253_G_A | 29858253 | 1.6 | 1.0 | 2.4 | 0.04237 | 0.14 | 0.16 | 0.14 | SNP |
| chr6_32376788_C_T | 32376788 | 1.4 | 1.0 | 2.0 | 0.04246 | 0.45 | 0.52 | 0.44 | SNP |
| chr6_32782149_G_C | 32782149 | 0.5 | 0.3 | 0.9 | 0.04258 | 0.08 | 0.04 | 0.08 | SNP |
| chr6_33036177_A_G | 33036177 | 0.6 | 0.4 | 1.0 | 0.04287 | 0.15 | 0.09 | 0.15 | SNP |
| chr6_32297209_G_C | 32297209 | 0.5 | 0.2 | 0.9 | 0.04311 | 0.07 | 0.04 | 0.07 | SNP |
| chr6_32816958_A_G | 32816958 | 1.3 | 1.0 | 1.8 | 0.04355 | 0.38 | 0.40 | 0.37 | SNP |
| chr6_29896999_C_T | 29896999 | 1.6 | 1.0 | 2.5 | 0.04386 | 0.15 | 0.17 | 0.15 | SNP |
| chr6_29942945_G_C | 29942945 | 0.7 | 0.5 | 1.0 | 0.04414 | 0.34 | 0.34 | 0.34 | SNP |
| chr6_31464739_G_A | 31464739 | 0.7 | 0.5 | 1.0 | 0.04413 | 0.30 | 0.24 | 0.30 | SNP |
| chr6_29942673_T_G | 29942673 | 0.7 | 0.6 | 1.0 | 0.04414 | 0.35 | 0.35 | 0.35 | SNP |
| chr6_29973526_T_C | 29973526 | 1.9 | 1.0 | 3.0 | 0.04415 | 0.35 | 0.35 | 0.35 | SNP |
| chr6_32731313_T_A | 32731313 | 0.6 | 0.4 | 1.0 | 0.04430 | 0.21 | 0.14 | 0.21 | SNP |
| chr6_33039484_A_G | 33039484 | 0.6 | 0.4 | 1.0 | 0.04443 | 0.14 | 0.09 | 0.15 | SNP |
| chr6_31348400_T_C | 31348400 | 0.4 | 0.1 | 0.9 | 0.04460 | 0.04 | 0.02 | 0.04 | SNP |
| chr6_33053477_G_C | 33053477 | 0.7 | 0.5 | 1.0 | 0.04469 | 0.17 | 0.22 | 0.18 | SNP |
| chr6_33476718_T_C | 33476718 | 0.8 | 0.6 | 1.0 | 0.04469 | 0.35 | 0.30 | 0.36 | SNP |
| chr6_29942083_C_T | 29942083 | 0.7 | 0.6 | 1.0 | 0.04484 | 0.35 | 0.35 | 0.35 | SNP |
| chr6_31397809_C_T | 31397809 | 1.9 | 1.0 | 2.1 | 0.04490 | 0.11 | 0.16 | 0.11 | SNP |
| chr6_31785228_C_G | 31785228 | 0.6 | 0.4 | 1.0 | 0.04507 | 0.28 | 0.23 | 0.28 | SNP |
| chr6_33045896_A_G | 33045896 | 0.4 | 0.1 | 0.9 | 0.04519 | 0.04 | 0.01 | 0.04 | SNP |
| chr6_32439753_T_A | 32439753 | 0.7 | 0.5 | 1.0 | 0.04520 | 0.31 | 0.24 | 0.32 | SNP |
| chr6_33033313_G_C | 33033313 | 0.6 | 0.4 | 1.0 | 0.04526 | 0.12 | 0.07 | 0.12 | SNP |
| chr6_32608350_G_A | 32608350 | 0.5 | 0.3 | 0.9 | 0.04535 | 0.10 | 0.05 | 0.10 | SNP |
| chr6_29944131_G_C | 29944131 | 0.7 | 0.6 | 1.0 | 0.04536 | 0.35 | 0.35 | 0.35 | SNP |
| chr6_29891825_T_C | 29891825 | 1.3 | 1.0 | 1.7 | 0.04552 | 0.48 | 0.48 | 0.48 | SNP |
| chr6_29892217_T_C | 29892217 | 1.4 | 1.0 | 1.9 | 0.04555 | 0.25 | 0.28 | 0.25 | SNP |
| chr6_31540141_C_A | 31540141 | 1.4 | 1.0 | 1.9 | 0.04560 | 0.38 | 0.44 | 0.38 | SNP |
| chr6_31151420_G_C | 31151420 | 0.5 | 0.3 | 0.9 | 0.04586 | 0.07 | 0.04 | 0.07 | SNP |
| chr6_33045891_C_T | 33045891 | 0.4 | 0.1 | 0.9 | 0.04606 | 0.04 | 0.01 | 0.04 | SNP |
| chr6_32826450_T_C | 32826450 | 0.7 | 0.6 | 1.0 | 0.04624 | 0.45 | 0.39 | 0.46 | SNP |
| chr6_29896967_C_T | 29896967 | 1.4 | 1.0 | 2.1 | 0.04642 | 0.19 | 0.22 | 0.19 | SNP |
| chr6_31906965_C_T | 31906965 | 0.5 | 0.3 | 1.0 | 0.04646 | 0.09 | 0.04 | 0.09 | SNP |
| chr6_29942842_C_A | 29942842 | 0.7 | 0.5 | 1.0 | 0.04661 | 0.34 | 0.34 | 0.34 | SNP |
| chr6_31905130_G_A | 31905130 | 0.5 | 0.3 | 1.0 | 0.04667 | 0.09 | 0.04 | 0.09 | SNP |
| chr6_31905328_G_C | 31905328 | 0.5 | 0.3 | 1.0 | 0.04667 | 0.09 | 0.04 | 0.09 | SNP |
| chr6_31907147_T_C | 31907147 | 0.5 | 0.3 | 1.0 | 0.04667 | 0.09 | 0.04 | 0.09 | SNP |
| chr6_31907168_C_T | 31907168 | 0.5 | 0.3 | 1.0 | 0.04667 | 0.09 | 0.04 | 0.09 | SNP |
| chr6_31365707_G_A | 31365707 | 0.7 | 0.5 | 1.0 | 0.04671 | 0.34 | 0.32 | 0.34 | SNP |
| chr6_32030692_T_A | 32030692 | 2.1 | 1.0 | 4.4 | 0.04676 | 0.12 | 0.12 | 0.12 | SNP |
| chr6_31475127_G_A | 31475127 | 1.4 | 1.0 | 2.1 | 0.04703 | 0.28 | 0.32 | 0.28 | SNP |
| chr6_32188713_C_G | 32188713 |     |     |     |         |      |      |      |     |



**Supplementary Table 6.** Association analysis of pulmonary involvement in all AAV patients versus controls, adjusting for sex and genetic structure (principal components 1-4).

| Variant            | position | OR   | CI lower | CI upper | p        | MAF  | MAF cases | MAF controls | MAF  | MAF  | MAF       | Type (SNP, HLA) |
|--------------------|----------|------|----------|----------|----------|------|-----------|--------------|------|------|-----------|-----------------|
| chr8_32943151_C_T  | 32943151 | 1.70 | 1.32     | 2.20     | 5.35E-05 | 0.39 | 0.44      | 0.34         | 0.34 | 0.34 | SNP       |                 |
| chr8_32943145_C_T  | 32943145 | 1.61 | 1.26     | 2.08     | 0.00018  | 0.44 | 0.48      | 0.44         | 0.44 | 0.39 | SNP       |                 |
| chr8_31323416_G_C  | 31323416 | 0.27 | 0.12     | 0.56     | 0.00059  | 0.13 | 0.13      | 0.15         | 0.15 | 0.15 | SNP       |                 |
| chr8_32942302_A_G  | 32942302 | 1.58 | 1.22     | 2.05     | 0.00066  | 0.39 | 0.43      | 0.35         | 0.35 | 0.35 | SNP       |                 |
| chr8_31233046_C_T  | 31233046 | 0.28 | 0.12     | 0.58     | 0.00088  | 0.12 | 0.13      | 0.14         | 0.14 | 0.14 | SNP       |                 |
| chr8_32012817_C_T  | 32012817 | 2.48 | 1.47     | 4.31     | 0.00091  | 0.08 | 0.11      | 0.06         | 0.06 | 0.06 | SNP       |                 |
| chr8_31222790_T_A  | 31222790 | 0.29 | 0.14     | 0.61     | 0.00115  | 0.13 | 0.12      | 0.14         | 0.14 | 0.14 | SNP       |                 |
| chr8_31293210_C_T  | 31293210 | 0.31 | 0.15     | 0.65     | 0.00234  | 0.12 | 0.13      | 0.14         | 0.14 | 0.14 | SNP       |                 |
| chr8_31430010_G_A  | 31430010 | 0.30 | 0.13     | 0.66     | 0.00322  | 0.13 | 0.12      | 0.14         | 0.14 | 0.14 | SNP       |                 |
| chr8_33048640_A_G  | 33048640 | 0.51 | 0.32     | 0.80     | 0.00372  | 0.10 | 0.07      | 0.13         | 0.13 | 0.13 | SNP       |                 |
| chr8_31239227_T_C  | 31239227 | 0.50 | 0.31     | 0.80     | 0.00383  | 0.39 | 0.37      | 0.42         | 0.42 | 0.42 | SNP       |                 |
| chr8_32943407_A_T  | 32943407 | 0.39 | 0.20     | 0.73     | 0.00395  | 0.08 | 0.07      | 0.10         | 0.10 | 0.10 | SNP       |                 |
| chr8_31430065_C_T  | 31430065 | 0.32 | 0.14     | 0.69     | 0.00417  | 0.13 | 0.12      | 0.14         | 0.14 | 0.14 | SNP       |                 |
| chr8_33048663_G_A  | 33048663 | 0.49 | 0.30     | 0.80     | 0.00486  | 0.08 | 0.06      | 0.11         | 0.11 | 0.11 | SNP       |                 |
| chr8_31326703_T_C  | 31326703 | 0.33 | 0.15     | 0.71     | 0.00499  | 0.13 | 0.13      | 0.14         | 0.14 | 0.14 | SNP       |                 |
| chr8_33050078_A_G  | 33050078 | 0.57 | 0.38     | 0.84     | 0.00559  | 0.10 | 0.07      | 0.13         | 0.13 | 0.13 | SNP       |                 |
| chr8_33050079_C_G  | 33050079 | 0.57 | 0.38     | 0.84     | 0.00559  | 0.10 | 0.07      | 0.13         | 0.13 | 0.13 | SNP       |                 |
| chr8_31326074_A_T  | 31326074 | 0.34 | 0.15     | 0.72     | 0.00561  | 0.13 | 0.12      | 0.13         | 0.13 | 0.13 | SNP       |                 |
| chr8_33048628_A_C  | 33048628 | 0.47 | 0.27     | 0.80     | 0.00618  | 0.07 | 0.05      | 0.09         | 0.09 | 0.09 | SNP       |                 |
| chr8_33048661_A_G  | 33048661 | 0.50 | 0.30     | 0.81     | 0.00620  | 0.08 | 0.06      | 0.11         | 0.11 | 0.11 | SNP       |                 |
| chr8_33545340_G_A  | 33545340 | 0.64 | 0.46     | 0.88     | 0.00680  | 0.23 | 0.19      | 0.27         | 0.27 | 0.27 | SNP       |                 |
| chr8_33071777_A_G  | 33071777 | 0.55 | 0.35     | 0.84     | 0.00699  | 0.09 | 0.06      | 0.12         | 0.12 | 0.12 | SNP       |                 |
| chr8_32944746_C_T  | 32944746 | 0.71 | 0.55     | 0.91     | 0.00711  | 0.46 | 0.43      | 0.50         | 0.50 | 0.50 | SNP       |                 |
| chr8_32946133_C_T  | 32946133 | 0.71 | 0.55     | 0.91     | 0.00755  | 0.46 | 0.43      | 0.50         | 0.50 | 0.50 | SNP       |                 |
| chr8_33050089_G_A  | 33050089 | 0.58 | 0.39     | 0.86     | 0.00798  | 0.10 | 0.07      | 0.12         | 0.12 | 0.12 | SNP       |                 |
| chr8_33055079_A_G  | 33055079 | 0.59 | 0.39     | 0.87     | 0.00819  | 0.10 | 0.07      | 0.12         | 0.12 | 0.12 | SNP       |                 |
| chr8_32939894_T_G  | 32939894 | 1.90 | 1.19     | 3.08     | 0.00819  | 0.10 | 0.07      | 0.12         | 0.12 | 0.12 | SNP       |                 |
| chr8_33050107_G_A  | 33050107 | 0.58 | 0.39     | 0.87     | 0.00843  | 0.10 | 0.07      | 0.12         | 0.12 | 0.12 | SNP       |                 |
| chr8_33047432_A_C  | 33047432 | 0.60 | 0.40     | 0.87     | 0.00846  | 0.10 | 0.08      | 0.13         | 0.13 | 0.13 | SNP       |                 |
| chr8_33053455_C_T  | 33053455 | 0.55 | 0.38     | 0.82     | 0.00885  | 0.10 | 0.07      | 0.12         | 0.12 | 0.12 | SNP       |                 |
| HLA_2F8D1_D0B1_D03 | 32627244 | 2.46 | 1.29     | 5.04     | 0.00893  | 0.05 | 0.07      | 0.03         | 0.03 | 0.03 | HLA (HLA) |                 |
| chr8_31465661_G_C  | 31465661 | 1.46 | 1.10     | 1.95     | 0.00951  | 0.38 | 0.41      | 0.34         | 0.34 | 0.34 | SNP       |                 |
| chr8_33071754_C_A  | 33071754 | 0.27 | 0.37     | 0.87     | 0.00966  | 0.09 | 0.07      | 0.12         | 0.12 | 0.12 | SNP       |                 |
| chr8_32917544_C_T  | 32917544 | 1.78 | 1.16     | 2.80     | 0.01008  | 0.09 | 0.11      | 0.07         | 0.07 | 0.07 | SNP       |                 |
| chr8_33050279_A_G  | 33050279 | 0.61 | 0.41     | 0.89     | 0.01125  | 0.10 | 0.08      | 0.13         | 0.13 | 0.13 | SNP       |                 |
| chr8_33049511_C_T  | 33049511 | 0.61 | 0.41     | 0.89     | 0.01131  | 0.10 | 0.08      | 0.13         | 0.13 | 0.13 | SNP       |                 |
| chr8_33050232_T_G  | 33050232 | 0.60 | 0.40     | 0.89     | 0.01140  | 0.10 | 0.07      | 0.12         | 0.12 | 0.12 | SNP       |                 |
| chr8_33050148_C_A  | 33050148 | 0.59 | 0.38     | 0.88     | 0.01173  | 0.09 | 0.07      | 0.12         | 0.12 | 0.12 | SNP       |                 |
| chr8_33048599_C_A  | 33048599 | 0.63 | 0.43     | 0.93     | 0.01223  | 0.09 | 0.07      | 0.12         | 0.12 | 0.12 | SNP       |                 |
| chr8_31669496_C_T  | 31669496 | 1.76 | 1.14     | 2.77     | 0.01269  | 0.09 | 0.12      | 0.07         | 0.07 | 0.07 | SNP       |                 |
| chr8_33166034_G_C  | 33166034 | 0.59 | 0.38     | 0.89     | 0.01274  | 0.10 | 0.08      | 0.12         | 0.12 | 0.12 | SNP       |                 |
| chr8_33046152_C_G  | 33046152 | 0.50 | 0.30     | 0.86     | 0.01276  | 0.06 | 0.04      | 0.08         | 0.08 | 0.08 | SNP       |                 |
| chr8_33055123_A_G  | 33055123 | 0.61 | 0.40     | 0.90     | 0.01283  | 0.10 | 0.08      | 0.13         | 0.13 | 0.13 | SNP       |                 |
| HLA_2F8D1_D0B1_D01 | 33043767 | 1.33 | 1.06     | 1.68     | 0.01283  | 0.34 | 0.30      | 0.38         | 0.38 | 0.38 | HLA (HLA) |                 |
| chr8_33071708_G_A  | 33071708 | 0.53 | 0.37     | 0.82     | 0.01283  | 0.09 | 0.07      | 0.11         | 0.11 | 0.11 | SNP       |                 |
| chr8_31473746_G_A  | 31473746 | 0.38 | 0.18     | 0.81     | 0.01286  | 0.13 | 0.13      | 0.14         | 0.14 | 0.14 | SNP       |                 |
| chr8_32627818_A_C  | 32627818 | 0.66 | 0.47     | 0.91     | 0.01290  | 0.28 | 0.26      | 0.31         | 0.31 | 0.31 | SNP       |                 |
| chr8_31367442_G_C  | 31367442 | 0.37 | 0.17     | 0.82     | 0.01459  | 0.10 | 0.08      | 0.12         | 0.12 | 0.12 | SNP       |                 |
| chr8_33048380_G_A  | 33048380 | 0.51 | 0.30     | 0.86     | 0.01308  | 0.06 | 0.04      | 0.08         | 0.08 | 0.08 | SNP       |                 |
| chr8_33050223_A_G  | 33050223 | 0.61 | 0.41     | 0.90     | 0.01309  | 0.10 | 0.08      | 0.12         | 0.12 | 0.12 | SNP       |                 |
| chr8_33050024_C_A  | 33050024 | 0.62 | 0.41     | 0.90     | 0.01311  | 0.10 | 0.08      | 0.12         | 0.12 | 0.12 | SNP       |                 |
| chr8_33050045_T_C  | 33050045 | 0.61 | 0.41     | 0.90     | 0.01314  | 0.10 | 0.08      | 0.12         | 0.12 | 0.12 | SNP       |                 |
| chr8_33050179_A_G  | 33050179 | 0.61 | 0.40     | 0.90     | 0.01332  | 0.10 | 0.08      | 0.12         | 0.12 | 0.12 | SNP       |                 |
| chr8_33050168_C_A  | 33050168 | 0.61 | 0.40     | 0.90     | 0.01339  | 0.10 | 0.08      | 0.12         | 0.12 | 0.12 | SNP       |                 |
| chr8_33050168_C_A  | 33050168 | 0.61 | 0.40     | 0.90     | 0.01348  | 0.10 | 0.08      | 0.12         | 0.12 | 0.12 | SNP       |                 |
| chr8_33047031_C_T  | 33047031 | 0.61 | 0.41     | 0.90     | 0.01354  | 0.10 | 0.08      | 0.12         | 0.12 | 0.12 | SNP       |                 |
| chr8_33053477_C_G  | 33053477 | 0.60 | 0.39     | 0.90     | 0.01384  | 0.09 | 0.07      | 0.12         | 0.12 | 0.12 | SNP       |                 |
| chr8_33053307_C_T  | 33053307 | 0.60 | 0.40     | 0.90     | 0.01399  | 0.10 | 0.07      | 0.12         | 0.12 | 0.12 | SNP       |                 |
| chr8_33050185_C_A  | 33050185 | 0.61 | 0.41     | 0.90     | 0.01402  | 0.10 | 0.08      | 0.12         | 0.12 | 0.12 | SNP       |                 |
| chr8_33050125_C_A  | 33050125 | 0.59 | 0.38     | 0.89     | 0.01433  | 0.09 | 0.07      | 0.12         | 0.12 | 0.12 | SNP       |                 |
| chr8_33071600_C_A  | 33071600 | 0.59 | 0.38     | 0.89     | 0.01437  | 0.09 | 0.07      | 0.11         | 0.11 | 0.11 | SNP       |                 |
| chr8_33160425_G_T  | 33160425 | 0.60 | 0.40     | 0.90     | 0.01441  | 0.09 | 0.07      | 0.12         | 0.12 | 0.12 | SNP       |                 |
| chr8_31085356_C_T  | 31085356 | 0.41 | 0.19     | 0.83     | 0.01467  | 0.13 | 0.13      | 0.13         | 0.13 | 0.13 | SNP       |                 |
| chr8_33053682_A_G  | 33053682 | 0.62 | 0.42     | 0.91     | 0.01479  | 0.10 | 0.08      | 0.12         | 0.12 | 0.12 | SNP       |                 |
| chr8_33053772_G_A  | 33053772 | 0.62 | 0.42     | 0.91     | 0.01479  | 0.10 | 0.08      | 0.12         | 0.12 | 0.12 | SNP       |                 |
| chr8_33053780_A_G  | 33053780 | 0.62 | 0.42     | 0.91     | 0.01479  | 0.10 | 0.08      | 0.12         | 0.12 | 0.12 | SNP       |                 |
| chr8_33053789_G_A  | 33053789 | 0.62 | 0.42     | 0.91     | 0.01479  | 0.10 | 0.08      | 0.12         | 0.12 | 0.12 | SNP       |                 |
| chr8_33053868_A_G  | 33053868 | 0.62 | 0.42     | 0.91     | 0.01479  | 0.10 | 0.08      | 0.12         | 0.12 | 0.12 | SNP       |                 |
| chr8_33053871_G_C  | 33053871 | 0.62 | 0.42     | 0.91     | 0.01479  | 0.10 | 0.08      | 0.12         | 0.12 | 0.12 | SNP       |                 |
| chr8_33053877_G_C  | 33053877 | 0.62 | 0.42     | 0.91     | 0.01479  | 0.10 | 0.08      | 0.12         | 0.12 | 0.12 | SNP       |                 |
| chr8_33053887_A_G  | 33053887 | 0.62 | 0.42     | 0.91     | 0.01479  | 0.10 | 0.08      | 0.12         | 0.12 | 0.12 | SNP       |                 |
| chr8_33053890_A_G  | 33053890 | 0.62 | 0.42     | 0.91     | 0.01479  | 0.10 | 0.08      | 0.12         | 0.12 | 0.12 | SNP       |                 |
| chr8_33053892_A_G  | 33053892 | 0.62 | 0.42     | 0.91     | 0.01479  | 0.10 | 0.08      | 0.12         | 0.12 | 0.12 | SNP       |                 |
| chr8_33054091_C_T  | 33054091 | 0.62 | 0.42     | 0.91     | 0.01479  | 0.10 | 0.08      | 0.12         | 0.12 | 0.12 | SNP       |                 |
| chr8_33054141_C_T  | 33054141 | 0.62 | 0.42     | 0.91     | 0.01479  | 0.10 | 0.08      | 0.12         | 0.12 | 0.12 | SNP       |                 |
| chr8_33054142_G_C  | 33054142 | 0.62 | 0.42     | 0.91     | 0.01479  | 0.10 | 0.08      | 0.12         | 0.12 | 0.12 | SNP       |                 |
| chr8_33054148_C_T  | 33054148 | 0.62 | 0.42     | 0.91     | 0.01479  | 0.10 | 0.08      | 0.12         | 0.12 | 0.12 | SNP       |                 |
| chr8_33054149_G_C  | 33054149 | 0.62 | 0.42     | 0.91     | 0.01479  | 0.10 | 0.08      | 0.12         | 0.12 | 0.12 | SNP       |                 |
| chr8_33054152_A_G  | 33054152 | 0.62 | 0.42     | 0.91     | 0.01479  | 0.10 | 0.08      | 0.12         | 0.12 | 0.12 | SNP       |                 |
| chr8_33054155_C_T  | 33054155 | 0.62 | 0.42     | 0.91     | 0.01479  | 0.10 | 0.08      | 0.12         | 0.12 | 0.12 | SNP       |                 |
| chr8_33054156_C_A  | 33054156 | 0.62 | 0.42     | 0.91     | 0.01479  | 0.10 | 0.08      | 0.12         | 0.12 | 0.12 | SNP       |                 |
| chr8_33054331_C_T  | 33054331 | 0.62 | 0.42     | 0.91     | 0.01479  | 0.10 | 0.08      | 0.12         | 0.12 | 0.12 | SNP       |                 |
| chr8_33054235_T_G  | 33054235 | 0.62 | 0.42     | 0.91     | 0.01479  | 0.10 | 0.08      | 0.12         | 0.12 | 0.12 | SNP       |                 |
| chr8_33054268_A_G  | 33054268 | 0.62 | 0.42     | 0.91     | 0.01479  | 0.10 | 0.08      | 0.12         | 0.12 | 0.12 | SNP       |                 |
| chr8_33054302_T_C  | 33054302 | 0.62 | 0.42     | 0.91     | 0.01479  | 0.10 | 0.08      | 0.12         | 0.12 | 0.12 | SNP       |                 |
| chr8_33054325_C_G  | 33054325 | 0.62 | 0.42     | 0.91     | 0.01479  | 0.10 | 0.08      | 0.12         | 0.12 | 0.12 | SNP       |                 |
| chr8_33054331_T_C  | 33054331 | 0.62 | 0.42     | 0.91     | 0.01479  | 0.10 | 0.08      | 0.12         | 0.12 | 0.12 | SNP       |                 |
| chr8_33054457_G_A  | 33054457 | 0.62 | 0.42     | 0.91     | 0.01479  | 0.10 | 0.08      | 0.12         | 0.12 | 0.12 | SNP       |                 |
| chr8_33054500_G_A  | 33054500 | 0.62 | 0.42     | 0.91     | 0.01479  | 0.10 | 0.08      | 0.12         | 0.12 | 0.12 | SNP       |                 |
| chr8_33054579_C_T  | 33054579 | 0.62 | 0.42     | 0.91     | 0.01479  | 0.10 | 0.08      | 0.12         | 0.12 | 0.12 | SNP       |                 |
| chr8_33054586_G_C  | 33054586 | 0.62 | 0.42     | 0.91     | 0.01479  | 0.10 | 0.08      | 0.12         | 0.12 | 0.12 | SNP       |                 |
| chr8_33054595_C_T  | 33054595 | 0.62 | 0.42     | 0.91     | 0.01479  | 0.10 | 0.08      | 0.12         | 0.12 | 0.12 | SNP       |                 |
| chr8_33054619_G_A  | 33054619 | 0.62 | 0.42     | 0.91     | 0.01479  | 0.10 | 0.08      | 0.12         | 0.12 | 0.12 | SNP       |                 |
| chr8_33054656_A_G  | 33054656 | 0.62 | 0.42     | 0.91     | 0.01479  | 0.10 | 0.08      | 0.12         | 0.12 | 0.12 | SNP       |                 |
| chr8_33054675_C_G  | 33054675 | 0.62 | 0.42     | 0.9      |          |      |           |              |      |      |           |                 |

| chr                 | SNP          | r2   | CI   | r2   | CI      | r2   | CI   | r2   | CI | r2 | CI | SNP      |
|---------------------|--------------|------|------|------|---------|------|------|------|----|----|----|----------|
| chr3                | 33050196_G_C | 0.63 | 0.42 | 0.93 | 0.02220 | 0.10 | 0.08 | 0.12 |    |    |    | SNP      |
| chr3                | 33053396_A_G | 0.58 | 0.37 | 0.92 | 0.02227 | 0.07 | 0.06 | 0.09 |    |    |    | SNP      |
| chr3                | 30796545_T_C | 0.51 | 0.28 | 0.90 | 0.02247 | 0.13 | 0.13 | 0.14 |    |    |    | SNP      |
| chr3                | 30229508_C_T | 1.99 | 1.12 | 3.70 | 0.02257 | 0.05 | 0.07 | 0.03 |    |    |    | SNP      |
| chr3                | 31765984_G_A | 0.39 | 0.17 | 0.87 | 0.02279 | 0.12 | 0.11 | 0.13 |    |    |    | SNP      |
| HLA_2F6H_B_08_01    | 31321652     | 0.44 | 0.21 | 0.88 | 0.02289 | 0.13 | 0.13 | 0.14 |    |    |    | HLA(HLA) |
| chr3                | 33050499_A_G | 0.63 | 0.42 | 0.94 | 0.02327 | 0.10 | 0.08 | 0.12 |    |    |    | SNP      |
| chr3                | 31326082_C_T | 1.42 | 1.05 | 1.91 | 0.02352 | 0.25 | 0.28 | 0.22 |    |    |    | SNP      |
| chr3                | 32185796     | 2.24 | 1.14 | 4.69 | 0.02356 | 0.04 | 0.05 | 0.02 |    |    |    | SNP      |
| chr3                | 33054413_T_G | 0.64 | 0.43 | 0.94 | 0.02361 | 0.10 | 0.08 | 0.12 |    |    |    | SNP      |
| chr3                | 33054414_T_A | 0.64 | 0.43 | 0.94 | 0.02362 | 0.10 | 0.08 | 0.12 |    |    |    | SNP      |
| chr3                | 33041064_C_A | 0.56 | 0.33 | 0.92 | 0.02376 | 0.06 | 0.04 | 0.08 |    |    |    | SNP      |
| chr3                | 33054342_T_A | 0.64 | 0.43 | 0.94 | 0.02378 | 0.10 | 0.08 | 0.12 |    |    |    | SNP      |
| chr3                | 33054373_C_G | 0.64 | 0.43 | 0.94 | 0.02378 | 0.10 | 0.08 | 0.12 |    |    |    | SNP      |
| chr3                | 33054381_T_C | 0.64 | 0.43 | 0.94 | 0.02378 | 0.10 | 0.08 | 0.12 |    |    |    | SNP      |
| chr3                | 33054386_C_T | 0.64 | 0.43 | 0.94 | 0.02378 | 0.10 | 0.08 | 0.12 |    |    |    | SNP      |
| chr3                | 31239708_G_A | 1.24 | 1.07 | 2.58 | 0.02384 | 0.10 | 0.13 | 0.08 |    |    |    | SNP      |
| chr3                | 31323353_G_A | 1.38 | 1.05 | 1.84 | 0.02400 | 0.40 | 0.43 | 0.36 |    |    |    | SNP      |
| chr3                | 33053902_A_G | 0.64 | 0.43 | 0.94 | 0.02502 | 0.10 | 0.08 | 0.12 |    |    |    | SNP      |
| chr3                | 33053906_C_T | 0.64 | 0.43 | 0.94 | 0.02502 | 0.10 | 0.08 | 0.12 |    |    |    | SNP      |
| chr3                | 31465047_G_T | 0.42 | 0.20 | 0.89 | 0.02520 | 0.13 | 0.13 | 0.13 |    |    |    | SNP      |
| chr3                | 31323233_A_G | 1.39 | 1.04 | 1.86 | 0.02543 | 0.40 | 0.43 | 0.36 |    |    |    | SNP      |
| chr3                | 32621893_A_G | 0.68 | 0.48 | 0.95 | 0.02593 | 0.27 | 0.25 | 0.30 |    |    |    | SNP      |
| chr3                | 33048457_C_G | 0.62 | 0.41 | 0.94 | 0.02615 | 0.09 | 0.07 | 0.11 |    |    |    | SNP      |
| chr3                | 33048461_T_A | 0.62 | 0.41 | 0.94 | 0.02637 | 0.09 | 0.07 | 0.11 |    |    |    | SNP      |
| chr3                | 33050973_G_C | 0.64 | 0.43 | 0.95 | 0.02661 | 0.10 | 0.08 | 0.12 |    |    |    | SNP      |
| chr3                | 31239449_C_G | 0.53 | 0.30 | 0.92 | 0.02679 | 0.17 | 0.16 | 0.19 |    |    |    | SNP      |
| chr3                | 32166384_G_A | 1.78 | 1.08 | 3.02 | 0.02706 | 0.07 | 0.09 | 0.05 |    |    |    | SNP      |
| chr3                | 33048459_T_G | 0.63 | 0.43 | 0.95 | 0.02727 | 0.10 | 0.08 | 0.12 |    |    |    | SNP      |
| chr3                | 29971636_G_C | 1.96 | 1.10 | 3.66 | 0.02751 | 0.05 | 0.07 | 0.03 |    |    |    | SNP      |
| chr3                | 33050203_C_G | 0.64 | 0.43 | 0.95 | 0.02758 | 0.10 | 0.08 | 0.12 |    |    |    | SNP      |
| chr3                | 32622772_G_A | 1.55 | 1.06 | 2.30 | 0.02764 | 0.12 | 0.10 | 0.10 |    |    |    | SNP      |
| chr3                | 33049979_A_G | 0.65 | 0.44 | 0.95 | 0.02765 | 0.10 | 0.08 | 0.12 |    |    |    | SNP      |
| chr3                | 33049983_C_T | 0.65 | 0.44 | 0.95 | 0.02765 | 0.10 | 0.08 | 0.12 |    |    |    | SNP      |
| chr3                | 31603555_C_A | 1.18 | 1.08 | 1.68 | 0.02766 | 0.07 | 0.08 | 0.05 |    |    |    | SNP      |
| chr3                | 31325745_C_T | 0.73 | 0.55 | 0.97 | 0.02816 | 0.50 | 0.52 | 0.47 |    |    |    | SNP      |
| chr3                | 32078373_A_C | 0.64 | 0.43 | 0.95 | 0.02866 | 0.11 | 0.09 | 0.14 |    |    |    | SNP      |
| chr3                | 33050936_C_G | 0.58 | 0.35 | 0.94 | 0.02892 | 0.06 | 0.05 | 0.08 |    |    |    | SNP      |
| chr3                | 32169145_G_A | 1.79 | 1.07 | 3.07 | 0.02907 | 0.07 | 0.08 | 0.05 |    |    |    | SNP      |
| chr3                | 31325116_T_G | 0.63 | 0.41 | 0.95 | 0.02932 | 0.36 | 0.34 | 0.39 |    |    |    | SNP      |
| chr3                | 31321267_A_G | 0.44 | 0.21 | 0.92 | 0.02945 | 0.13 | 0.13 | 0.14 |    |    |    | SNP      |
| chr3                | 31478957_C_G | 0.43 | 0.20 | 0.92 | 0.02954 | 0.10 | 0.08 | 0.12 |    |    |    | SNP      |
| chr3                | 33052958_C_T | 0.64 | 0.43 | 0.95 | 0.02959 | 0.10 | 0.08 | 0.12 |    |    |    | SNP      |
| chr3                | 31520204_C_T | 2.24 | 1.11 | 4.80 | 0.02977 | 0.04 | 0.05 | 0.03 |    |    |    | SNP      |
| chr3                | 33054400_T_C | 0.64 | 0.43 | 0.95 | 0.02988 | 0.10 | 0.08 | 0.12 |    |    |    | SNP      |
| chr3                | 33054404_A_G | 0.65 | 0.43 | 0.95 | 0.02988 | 0.10 | 0.08 | 0.12 |    |    |    | SNP      |
| chr3                | 33054410_T_G | 0.65 | 0.43 | 0.95 | 0.02988 | 0.10 | 0.08 | 0.12 |    |    |    | SNP      |
| chr3                | 32611467_G_C | 0.65 | 0.44 | 0.96 | 0.03015 | 0.28 | 0.26 | 0.30 |    |    |    | SNP      |
| HLA_2F6H_D8B1_04_04 | 32546552     | 0.62 | 0.40 | 0.95 | 0.03029 | 0.09 | 0.07 | 0.12 |    |    |    | HLA(HLA) |
| chr3                | 31474000_C_T | 0.72 | 0.53 | 0.97 | 0.03070 | 0.34 | 0.33 | 0.36 |    |    |    | SNP      |
| chr3                | 31299443_C_T | 1.65 | 1.05 | 2.67 | 0.03133 | 0.11 | 0.12 | 0.09 |    |    |    | SNP      |
| chr3                | 33053167_C_G | 0.65 | 0.44 | 0.96 | 0.03133 | 0.10 | 0.08 | 0.13 |    |    |    | SNP      |
| chr3                | 32439964_G_A | 1.48 | 1.04 | 2.14 | 0.03155 | 0.34 | 0.35 | 0.33 |    |    |    | SNP      |
| chr3                | 33053352_C_G | 0.64 | 0.38 | 0.95 | 0.03211 | 0.07 | 0.06 | 0.09 |    |    |    | SNP      |
| chr3                | 32180431_A_T | 1.76 | 1.06 | 3.00 | 0.03219 | 0.07 | 0.09 | 0.05 |    |    |    | SNP      |
| chr3                | 32628195_A_G | 0.54 | 0.30 | 0.94 | 0.03227 | 0.05 | 0.03 | 0.07 |    |    |    | SNP      |
| chr3                | 31236854_C_G | 0.54 | 0.27 | 0.94 | 0.03231 | 0.15 | 0.14 | 0.15 |    |    |    | SNP      |
| chr3                | 31478986_C_T | 0.72 | 0.54 | 0.97 | 0.03233 | 0.34 | 0.33 | 0.35 |    |    |    | SNP      |
| chr3                | 33050144_C_T | 0.58 | 0.35 | 0.95 | 0.03255 | 0.06 | 0.05 | 0.08 |    |    |    | SNP      |
| chr3                | 33039825_C_G | 0.68 | 0.48 | 0.98 | 0.03274 | 0.12 | 0.10 | 0.14 |    |    |    | SNP      |
| chr3                | 33050463_C_G | 0.58 | 0.35 | 0.95 | 0.03280 | 0.06 | 0.05 | 0.08 |    |    |    | SNP      |
| chr3                | 32190217_C_T | 1.43 | 1.03 | 1.99 | 0.03317 | 0.29 | 0.32 | 0.25 |    |    |    | SNP      |
| chr3                | 32467170_G_A | 0.73 | 0.54 | 0.98 | 0.03344 | 0.10 | 0.08 | 0.12 |    |    |    | SNP      |
| chr3                | 33050394_G_A | 0.58 | 0.35 | 0.95 | 0.03393 | 0.06 | 0.05 | 0.08 |    |    |    | SNP      |
| chr3                | 31591928_G_A | 1.43 | 1.03 | 1.99 | 0.03434 | 0.37 | 0.40 | 0.34 |    |    |    | SNP      |
| chr3                | 31325115_G_A | 0.73 | 0.54 | 0.98 | 0.03447 | 0.07 | 0.06 | 0.09 |    |    |    | SNP      |
| chr3                | 32904981_A_G | 1.40 | 1.03 | 1.91 | 0.03441 | 0.21 | 0.23 | 0.19 |    |    |    | SNP      |
| chr3                | 32629403_C_T | 0.68 | 0.47 | 0.97 | 0.03442 | 0.23 | 0.21 | 0.25 |    |    |    | SNP      |
| chr3                | 31545711_A_G | 1.76 | 1.06 | 3.00 | 0.03462 | 0.07 | 0.08 | 0.05 |    |    |    | SNP      |
| chr3                | 31325494_C_T | 0.65 | 0.43 | 0.97 | 0.03462 | 0.36 | 0.34 | 0.38 |    |    |    | SNP      |
| chr3                | 31325504_C_T | 0.65 | 0.43 | 0.97 | 0.03462 | 0.36 | 0.34 | 0.38 |    |    |    | SNP      |
| chr3                | 31325513_C_G | 0.65 | 0.43 | 0.97 | 0.03462 | 0.36 | 0.34 | 0.38 |    |    |    | SNP      |
| chr3                | 31325521_C_G | 0.65 | 0.43 | 0.97 | 0.03462 | 0.36 | 0.34 | 0.38 |    |    |    | SNP      |
| chr3                | 31325526_A_G | 0.65 | 0.43 | 0.97 | 0.03462 | 0.36 | 0.34 | 0.38 |    |    |    | SNP      |
| chr3                | 31325529_C_T | 0.65 | 0.43 | 0.97 | 0.03462 | 0.36 | 0.34 | 0.38 |    |    |    | SNP      |
| chr3                | 31325532_A_G | 0.65 | 0.43 | 0.97 | 0.03462 | 0.36 | 0.34 | 0.38 |    |    |    | SNP      |
| chr3                | 32489964_G_A | 1.77 | 1.06 | 3.07 | 0.03473 | 0.08 | 0.10 | 0.05 |    |    |    | SNP      |
| chr3                | 32151443_C_T | 1.80 | 1.05 | 2.78 | 0.03475 | 0.05 | 0.06 | 0.06 |    |    |    | SNP      |
| chr3                | 29898945_A_G | 0.35 | 0.12 | 0.89 | 0.03529 | 0.02 | 0.01 | 0.03 |    |    |    | SNP      |
| chr3                | 29913698_G_C | 0.64 | 0.41 | 0.97 | 0.03617 | 0.08 | 0.06 | 0.10 |    |    |    | SNP      |
| chr3                | 32627450_A_G | 1.42 | 1.02 | 1.98 | 0.03634 | 0.36 | 0.40 | 0.32 |    |    |    | SNP      |
| chr3                | 31382943_G_A | 1.58 | 1.03 | 2.44 | 0.03647 | 0.10 | 0.09 | 0.09 |    |    |    | SNP      |
| chr3                | 32489960_G_A | 1.76 | 1.06 | 3.06 | 0.03649 | 0.08 | 0.10 | 0.05 |    |    |    | SNP      |
| chr3                | 32605485_C_T | 0.66 | 0.44 | 0.97 | 0.03726 | 0.31 | 0.29 | 0.32 |    |    |    | SNP      |
| chr3                | 33050521_G_C | 0.65 | 0.43 | 0.97 | 0.03751 | 0.10 | 0.08 | 0.12 |    |    |    | SNP      |
| chr3                | 33396641_A_G | 1.36 | 1.02 | 1.83 | 0.03759 | 0.24 | 0.27 | 0.21 |    |    |    | SNP      |
| chr3                | 31326072_G_A | 1.45 | 1.02 | 2.07 | 0.03773 | 0.15 | 0.17 | 0.13 |    |    |    | SNP      |
| chr3                | 32190038_G_A | 0.57 | 0.33 | 0.93 | 0.03831 | 0.18 | 0.18 | 0.20 |    |    |    | SNP      |
| chr3                | 33050525_T_C | 0.65 | 0.44 | 0.97 | 0.03844 | 0.10 | 0.08 | 0.12 |    |    |    | SNP      |
| chr3                | 32996001_C_A | 0.41 | 0.17 | 0.95 | 0.03888 | 0.13 | 0.13 | 0.14 |    |    |    | SNP      |
| chr3                | 32633811_C_T | 1.82 | 1.05 | 3.29 | 0.03915 | 0.05 | 0.06 | 0.03 |    |    |    | SNP      |
| chr3                | 32802820_C_T | 1.31 | 1.01 | 1.71 | 0.03931 | 0.37 | 0.39 | 0.35 |    |    |    | SNP      |
| chr3                | 31463790_T_C | 0.73 | 0.54 | 0.98 | 0.03939 | 0.34 | 0.33 | 0.35 |    |    |    | SNP      |
| chr3                | 31327776_C_G | 1.46 | 1.02 | 1.83 | 0.03944 | 0.14 | 0.26 | 0.21 |    |    |    | SNP      |
| chr3                | 33050526_C_T | 0.66 | 0.44 | 0.98 | 0.03985 | 0.10 | 0.08 | 0.12 |    |    |    | SNP      |
| chr3                | 32808031_A_G | 0.41 | 0.17 | 0.95 | 0.03996 | 0.12 | 0.12 | 0.12 |    |    |    | SNP      |
| chr3                | 32803999_A_G | 0.41 | 0.18 | 0.95 | 0.04000 | 0.03 | 0.01 | 0.03 |    |    |    | SNP      |
| chr3                | 32627480_G_A | 0.71 | 0.51 | 0.98 | 0.04073 | 0.46 | 0.45 | 0.49 |    |    |    | SNP      |
| chr3                | 32500957_A_G | 0.57 | 0.33 | 0.97 | 0.04076 | 0.15 | 0.15 | 0.16 |    |    |    | SNP      |
| chr3                | 32945330_C_G | 1.62 | 1.03 | 2.60 | 0.04079 | 0.08 | 0.07 | 0.08 |    |    |    | SNP      |
| chr3                | 31464365_G_C | 0.73 | 0.54 | 0.99 | 0.04077 | 0.34 | 0.33 | 0.36 |    |    |    | SNP      |
| chr3                | 32516538_C_T | 1.80 | 1.04 | 3.20 | 0.04078 | 0.06 | 0.07 | 0.04 |    |    |    | SNP      |
| chr3                | 33052552_G_C | 0.65 | 0.42 | 0.98 | 0.04086 | 0.10 | 0.08 | 0.12 |    |    |    | SNP      |
| chr3                | 31467365_C_T | 0.73 | 0.54 | 0.99 | 0.04102 | 0.34 | 0.33 | 0.35 |    |    |    | SNP      |
| chr3                | 33239869_C_T | 0.67 | 0.46 | 0.98 | 0.04107 | 0.11 | 0.09 | 0.13 |    |    |    | SNP      |
| chr3                | 31326055_G_A | 1.44 | 1.02 | 2.02 | 0.04185 | 0.15 | 0.17 | 0.13 |    |    |    | SNP      |
| chr3                | 30552937_C_A | 0.76 | 0.58 | 0.99 | 0.04195 | 0.40 | 0.37 | 0.43 |    |    |    | SNP      |
| chr3                | 32325562_G_A | 0.43 | 0.19 | 0.96 | 0.04202 | 0.12 | 0.12 | 0.12 |    |    |    | SNP      |
| chr3                | 32180146_G_A | 0.57 | 0.33 | 0.98 | 0.04213 | 0.07 | 0.05 | 0.10 |    |    |    | SNP      |

**Supplementary Table 7.** Association analysis of ear-nose- and throat involvement in all AAV patients versus controls, adjusting for sex and genetic structure (principal components 1-4).

| Variant                | position | OR   | CI lower | CI upper | p        | MAF  | MAF cases | MAF controls | Type (SNP) |
|------------------------|----------|------|----------|----------|----------|------|-----------|--------------|------------|
| chr6_33053455_C_T      | 33053455 | 0.33 | 0.22     | 0.50     | 2.45E-07 | 0.10 | 0.06      | 0.16         | SNP        |
| chr6_33053399_T_C      | 33053399 | 0.34 | 0.22     | 0.51     | 3.83E-07 | 0.10 | 0.06      | 0.17         | SNP        |
| chr6_33053477_G_C      | 33053477 | 0.34 | 0.22     | 0.52     | 5.77E-07 | 0.09 | 0.06      | 0.16         | SNP        |
| chr6_33052986_T_C      | 33052986 | 0.36 | 0.24     | 0.53     | 5.91E-07 | 0.10 | 0.06      | 0.17         | SNP        |
| chr6_33053723_T_C      | 33053723 | 0.36 | 0.24     | 0.53     | 5.91E-07 | 0.10 | 0.06      | 0.17         | SNP        |
| chr6_33053728_C_T      | 33053728 | 0.36 | 0.24     | 0.53     | 5.91E-07 | 0.10 | 0.06      | 0.17         | SNP        |
| chr6_33053468_G_T      | 33053468 | 0.35 | 0.22     | 0.53     | 9.98E-07 | 0.09 | 0.06      | 0.16         | SNP        |
| chr6_33050499_A_G      | 33050499 | 0.36 | 0.24     | 0.54     | 1.01E-06 | 0.10 | 0.06      | 0.17         | SNP        |
| xHLA_2field_DRB1_04_04 | 32546552 | 0.33 | 0.21     | 0.51     | 1.04E-06 | 0.09 | 0.06      | 0.16         | HLA (HLA)  |
| chr6_33050148_T_C      | 33050148 | 0.35 | 0.23     | 0.53     | 1.24E-06 | 0.09 | 0.06      | 0.16         | SNP        |
| chr6_33071754_C_A      | 33071754 | 0.34 | 0.21     | 0.52     | 1.36E-06 | 0.09 | 0.06      | 0.15         | SNP        |
| chr6_33050118_C_T      | 33050118 | 0.35 | 0.23     | 0.54     | 1.41E-06 | 0.09 | 0.06      | 0.16         | SNP        |
| chr6_33055009_C_A      | 33055009 | 0.38 | 0.25     | 0.56     | 1.50E-06 | 0.10 | 0.07      | 0.17         | SNP        |
| chr6_33053682_G_A      | 33053682 | 0.38 | 0.25     | 0.56     | 1.63E-06 | 0.10 | 0.07      | 0.17         | SNP        |
| chr6_33053772_G_A      | 33053772 | 0.38 | 0.25     | 0.56     | 1.63E-06 | 0.10 | 0.07      | 0.17         | SNP        |
| chr6_33053780_T_A      | 33053780 | 0.38 | 0.25     | 0.56     | 1.63E-06 | 0.10 | 0.07      | 0.17         | SNP        |
| chr6_33053789_A_G      | 33053789 | 0.38 | 0.25     | 0.56     | 1.63E-06 | 0.10 | 0.07      | 0.17         | SNP        |
| chr6_33053868_A_G      | 33053868 | 0.38 | 0.25     | 0.56     | 1.63E-06 | 0.10 | 0.07      | 0.17         | SNP        |
| chr6_33053871_A_G      | 33053871 | 0.38 | 0.25     | 0.56     | 1.63E-06 | 0.10 | 0.07      | 0.17         | SNP        |
| chr6_33053877_G_A      | 33053877 | 0.38 | 0.25     | 0.56     | 1.63E-06 | 0.10 | 0.07      | 0.17         | SNP        |
| chr6_33053887_A_G      | 33053887 | 0.38 | 0.25     | 0.56     | 1.63E-06 | 0.10 | 0.07      | 0.17         | SNP        |
| chr6_33053890_G_A      | 33053890 | 0.38 | 0.25     | 0.56     | 1.63E-06 | 0.10 | 0.07      | 0.17         | SNP        |
| chr6_33053902_C_T      | 33053902 | 0.38 | 0.25     | 0.56     | 1.63E-06 | 0.10 | 0.07      | 0.17         | SNP        |
| chr6_33054091_C_T      | 33054091 | 0.38 | 0.25     | 0.56     | 1.63E-06 | 0.10 | 0.07      | 0.17         | SNP        |
| chr6_33054141_T_C      | 33054141 | 0.38 | 0.25     | 0.56     | 1.63E-06 | 0.10 | 0.07      | 0.17         | SNP        |
| chr6_33054142_G_C      | 33054142 | 0.38 | 0.25     | 0.56     | 1.63E-06 | 0.10 | 0.07      | 0.17         | SNP        |
| chr6_33054148_C_T      | 33054148 | 0.38 | 0.25     | 0.56     | 1.63E-06 | 0.10 | 0.07      | 0.17         | SNP        |
| chr6_33054149_T_C      | 33054149 | 0.38 | 0.25     | 0.56     | 1.63E-06 | 0.10 | 0.07      | 0.17         | SNP        |
| chr6_33054152_A_G      | 33054152 | 0.38 | 0.25     | 0.56     | 1.63E-06 | 0.10 | 0.07      | 0.17         | SNP        |
| chr6_33054155_C_T      | 33054155 | 0.38 | 0.25     | 0.56     | 1.63E-06 | 0.10 | 0.07      | 0.17         | SNP        |
| chr6_33054156_A_G      | 33054156 | 0.38 | 0.25     | 0.56     | 1.63E-06 | 0.10 | 0.07      | 0.17         | SNP        |
| chr6_33054231_C_T      | 33054231 | 0.38 | 0.25     | 0.56     | 1.63E-06 | 0.10 | 0.07      | 0.17         | SNP        |
| chr6_33054235_T_G      | 33054235 | 0.38 | 0.25     | 0.56     | 1.63E-06 | 0.10 | 0.07      | 0.17         | SNP        |
| chr6_33054268_C_A      | 33054268 | 0.38 | 0.25     | 0.56     | 1.63E-06 | 0.10 | 0.07      | 0.17         | SNP        |
| chr6_33054280_T_C      | 33054280 | 0.38 | 0.25     | 0.56     | 1.63E-06 | 0.10 | 0.07      | 0.17         | SNP        |
| chr6_33054281_G_A      | 33054281 | 0.38 | 0.25     | 0.56     | 1.63E-06 | 0.10 | 0.07      | 0.17         | SNP        |
| chr6_33054302_T_C      | 33054302 | 0.38 | 0.25     | 0.56     | 1.63E-06 | 0.10 | 0.07      | 0.17         | SNP        |
| chr6_33054325_G_C      | 33054325 | 0.38 | 0.25     | 0.56     | 1.63E-06 | 0.10 | 0.07      | 0.17         | SNP        |
| chr6_33054331_T_C      | 33054331 | 0.38 | 0.25     | 0.56     | 1.63E-06 | 0.10 | 0.07      | 0.17         | SNP        |
| chr6_33054457_A_G      | 33054457 | 0.38 | 0.25     | 0.56     | 1.63E-06 | 0.10 | 0.07      | 0.17         | SNP        |
| chr6_33054550_G_A      | 33054550 | 0.38 | 0.25     | 0.56     | 1.63E-06 | 0.10 | 0.07      | 0.17         | SNP        |
| chr6_33054579_C_T      | 33054579 | 0.38 | 0.25     | 0.56     | 1.63E-06 | 0.10 | 0.07      | 0.17         | SNP        |
| chr6_33054586_A_G      | 33054586 | 0.38 | 0.25     | 0.56     | 1.63E-06 | 0.10 | 0.07      | 0.17         | SNP        |
| chr6_33054595_C_T      | 33054595 | 0.38 | 0.25     | 0.56     | 1.63E-06 | 0.10 | 0.07      | 0.17         | SNP        |
| chr6_33054619_G_A      | 33054619 | 0.38 | 0.25     | 0.56     | 1.63E-06 | 0.10 | 0.07      | 0.17         | SNP        |
| chr6_33054656_A_C      | 33054656 | 0.38 | 0.25     | 0.56     | 1.63E-06 | 0.10 | 0.07      | 0.17         | SNP        |
| chr6_33054675_C_G      | 33054675 | 0.38 | 0.25     | 0.56     | 1.63E-06 | 0.10 | 0.07      | 0.17         | SNP        |
| chr6_33054683_A_G      | 33054683 | 0.38 | 0.25     | 0.56     | 1.63E-06 | 0.10 | 0.07      | 0.17         | SNP        |
| chr6_33054687_G_A      | 33054687 | 0.38 | 0.25     | 0.56     | 1.63E-06 | 0.10 | 0.07      | 0.17         | SNP        |
| chr6_33054711_G_T      | 33054711 | 0.38 | 0.25     | 0.56     | 1.63E-06 | 0.10 | 0.07      | 0.17         | SNP        |
| chr6_33054721_C_T      | 33054721 | 0.38 | 0.25     | 0.56     | 1.63E-06 | 0.10 | 0.07      | 0.17         | SNP        |
| chr6_33054807_C_T      | 33054807 | 0.38 | 0.25     | 0.56     | 1.63E-06 | 0.10 | 0.07      | 0.17         | SNP        |
| chr6_33054890_C_T      | 33054890 | 0.38 | 0.25     | 0.56     | 1.63E-06 | 0.10 | 0.07      | 0.17         | SNP        |
| chr6_33055047_A_G      | 33055047 | 0.38 | 0.25     | 0.56     | 1.76E-06 | 0.10 | 0.07      | 0.17         | SNP        |
| chr6_33050473_A_G      | 33050473 | 0.37 | 0.25     | 0.55     | 1.80E-06 | 0.10 | 0.06      | 0.16         | SNP        |
| chr6_33052958_C_T      | 33052958 | 0.37 | 0.24     | 0.55     | 1.81E-06 | 0.10 | 0.06      | 0.16         | SNP        |
| chr6_33050279_A_G      | 33050279 | 0.38 | 0.26     | 0.56     | 1.87E-06 | 0.10 | 0.07      | 0.17         | SNP        |
| chr6_33050078_A_G      | 33050078 | 0.37 | 0.25     | 0.55     | 1.96E-06 | 0.10 | 0.06      | 0.16         | SNP        |
| chr6_33050079_C_G      | 33050079 | 0.37 | 0.25     | 0.56     | 1.96E-06 | 0.10 | 0.07      | 0.16         | SNP        |
| chr6_33050125_G_A      | 33050125 | 0.36 | 0.23     | 0.55     | 2.09E-06 | 0.09 | 0.06      | 0.15         | SNP        |
| chr6_33055123_A_G      | 33055123 | 0.37 | 0.25     | 0.56     | 2.21E-06 | 0.10 | 0.07      | 0.17         | SNP        |
| chr6_33049211_C_T      | 33049211 | 0.38 | 0.25     | 0.57     | 2.22E-06 | 0.10 | 0.07      | 0.17         | SNP        |
| chr6_33054046_T_G      | 33054046 | 0.38 | 0.25     | 0.57     | 2.38E-06 | 0.10 | 0.07      | 0.16         | SNP        |
| chr6_33054057_G_A      | 33054057 | 0.38 | 0.25     | 0.57     | 2.38E-06 | 0.10 | 0.07      | 0.16         | SNP        |
| chr6_33054071_G_A      | 33054071 | 0.38 | 0.25     | 0.57     | 2.38E-06 | 0.10 | 0.07      | 0.16         | SNP        |
| chr6_33053968_T_A      | 33053968 | 0.38 | 0.25     | 0.57     | 2.45E-06 | 0.10 | 0.07      | 0.16         | SNP        |
| chr6_33053971_T_C      | 33053971 | 0.38 | 0.25     | 0.57     | 2.45E-06 | 0.10 | 0.07      | 0.16         | SNP        |
| chr6_33047432_A_C      | 33047432 | 0.39 | 0.26     | 0.57     | 2.49E-06 | 0.10 | 0.07      | 0.17         | SNP        |
| chr6_32604585_A_T      | 32604585 | 0.35 | 0.23     | 0.54     | 2.51E-06 | 0.31 | 0.27      | 0.38         | SNP        |
| chr6_33054353_G_A      | 33054353 | 0.38 | 0.25     | 0.57     | 2.60E-06 | 0.10 | 0.07      | 0.16         | SNP        |
| chr6_33054355_A_C      | 33054355 | 0.38 | 0.25     | 0.57     | 2.60E-06 | 0.10 | 0.07      | 0.16         | SNP        |
| chr6_33053352_G_C      | 33053352 | 0.38 | 0.23     | 0.55     | 2.79E-06 | 0.10 | 0.06      | 0.16         | SNP        |
| chr6_33050179_A_G      | 33050179 | 0.38 | 0.25     | 0.57     | 3.22E-06 | 0.10 | 0.07      | 0.16         | SNP        |
| chr6_33050168_C_A      | 33050168 | 0.38 | 0.25     | 0.57     | 3.35E-06 | 0.10 | 0.07      | 0.16         | SNP        |
| chr6_33050185_C_A      | 33050185 | 0.38 | 0.25     | 0.57     | 3.44E-06 | 0.10 | 0.07      | 0.16         | SNP        |
| chr6_33050089_G_A      | 33050089 | 0.38 | 0.25     | 0.57     | 3.49E-06 | 0.10 | 0.07      | 0.16         | SNP        |
| chr6_33054659_A_G      | 33054659 | 0.39 | 0.26     | 0.58     | 3.61E-06 | 0.10 | 0.07      | 0.16         | SNP        |
| chr6_33048599_C_A      | 33048599 | 0.49 | 0.36     | 0.66     | 3.82E-06 | 0.29 | 0.24      | 0.38         | SNP        |
| chr6_32607126_A_G      | 32607126 | 0.38 | 0.25     | 0.57     | 3.85E-06 | 0.31 | 0.27      | 0.38         | SNP        |
| chr6_33039625_T_C      | 33039625 | 0.43 | 0.29     | 0.61     | 3.90E-06 | 0.12 | 0.08      | 0.19         | SNP        |
| chr6_33054413_T_G      | 33054413 | 0.38 | 0.25     | 0.57     | 3.90E-06 | 0.10 | 0.07      | 0.16         | SNP        |
| chr6_33054414_T_A      | 33054414 | 0.38 | 0.25     | 0.57     | 3.90E-06 | 0.10 | 0.07      | 0.16         | SNP        |
| chr6_33050223_G_C      | 33050223 | 0.39 | 0.26     | 0.58     | 3.91E-06 | 0.10 | 0.07      | 0.16         | SNP        |
| chr6_33053248_A_G      | 33053248 | 0.36 | 0.23     | 0.55     | 4.00E-06 | 0.10 | 0.06      | 0.16         | SNP        |
| chr6_33053902_A_G      | 33053902 | 0.39 | 0.26     | 0.58     | 4.15E-06 | 0.10 | 0.07      | 0.16         | SNP        |
| chr6_33053906_G_T      | 33053906 | 0.39 | 0.26     | 0.58     | 4.15E-06 | 0.10 | 0.07      | 0.16         | SNP        |
| chr6_33054342_T_A      | 33054342 | 0.39 | 0.26     | 0.58     | 4.21E-06 | 0.10 | 0.07      | 0.16         | SNP        |
| chr6_33054373_C_T      | 33054373 | 0.39 | 0.26     | 0.58     | 4.21E-06 | 0.10 | 0.07      | 0.16         | SNP        |
| chr6_33054381_T_C      | 33054381 | 0.39 | 0.26     | 0.58     | 4.21E-06 | 0.10 | 0.07      | 0.16         | SNP        |
| chr6_33054386_C_T      | 33054386 | 0.39 | 0.26     | 0.58     | 4.21E-06 | 0.10 | 0.07      | 0.16         | SNP        |
| chr6_33050232_T_G      | 33050232 | 0.38 | 0.25     | 0.57     | 4.22E-06 | 0.10 | 0.07      | 0.16         | SNP        |
| chr6_33055079_A_G      | 33055079 | 0.39 | 0.26     | 0.58     | 4.28E-06 | 0.10 | 0.07      | 0.16         | SNP        |
| chr6_33050107_G_A      | 33050107 | 0.38 | 0.25     | 0.57     | 4.28E-06 | 0.10 | 0.07      | 0.16         | SNP        |
| chr6_33050525_T_C      | 33050525 | 0.38 | 0.25     | 0.57     | 4.35E-06 | 0.10 | 0.06      | 0.16         | SNP        |
| chr6_33071708_G_A      | 33071708 | 0.35 | 0.22     | 0.55     | 4.56E-06 | 0.09 | 0.06      | 0.15         | SNP        |
| chr6_33050526_C_T      | 33050526 | 0.38 | 0.25     | 0.57     | 4.59E-06 | 0.10 | 0.06      | 0.16         | SNP        |
| chr6_33052950_T_C      | 33052950 | 0.38 | 0.25     | 0.57     | 4.65E-06 | 0.09 | 0.06      | 0.15         | SNP        |
| chr6_33050521_G_T      | 33050521 | 0.38 | 0.25     | 0.57     | 4.89E-06 | 0.10 | 0.07      | 0.16         | SNP        |
| chr6_32605178_T_C      | 32605178 | 0.39 | 0.26     | 0.58     | 4.92E-06 | 0.30 | 0.27      | 0.37         | SNP        |
| chr6_33050186_T_A      | 33050186 | 0.39 | 0.25     | 0.58     | 5.11E-06 | 0.10 | 0.07      | 0.16         | SNP        |
| xHLA_2field_DPB1_04_01 | 33043767 | 1.76 | 1.38     | 2.24     | 5.45E-06 | 0.34 | 0.29      | 0.44         | HLA (HLA)  |
| chr6_32605555_T_A      | 32605555 | 0.39 | 0.26     | 0.58     | 5.51E-06 | 0.31 | 0.27      | 0.38         | SNP        |
| chr6_33071777_A_G      | 33071777 | 0.36 | 0.23     | 0.55     | 5.67E-06 | 0.09 | 0.06      | 0.15         | SNP        |
| chr6_33053270_T_A      | 33053270 | 0.36 | 0.23     | 0.56     | 6.02E-06 | 0.09 | 0.06      | 0.15         | SNP        |
| chr6_32609479_C_A      | 32609479 | 0.39 | 0.26     | 0.59     | 6.09E-06 | 0.30 | 0.27      | 0.37         | SNP        |
| chr6_33053771_T_C      | 33053771 | 0.36 | 0.23     | 0.56     | 6.15E-06 | 0.09 | 0.06      | 0.15         | SNP        |
| chr6_32608478_T_C      | 32608478 | 0.39 | 0.26     | 0.58     | 6.30E-06 | 0.30 | 0.27      | 0.37         | SNP        |
| chr6_33048602_C_A      | 33048602 | 0.50 | 0.37     | 0.67     | 6.45E-06 | 0.28 | 0.23      | 0.37         | SNP        |
| chr6_33054400_T_C      | 33054400 | 0.39 | 0.26     | 0.59     | 6.45E-06 | 0.10 | 0.07      | 0.16         | SNP        |
| chr6_33054404_A_G      | 3305440  |      |          |          |          |      |           |              |            |

|                        |          |      |      |      |          |      |      |      |            |
|------------------------|----------|------|------|------|----------|------|------|------|------------|
| chr6_33045255_T_C      | 33045255 | 0.52 | 0.39 | 0.69 | 9.97E-06 | 0.24 | 0.20 | 0.31 | SNP        |
| chr6_33071600_C_A      | 33071600 | 0.37 | 0.24 | 0.57 | 1.02E-05 | 0.09 | 0.06 | 0.15 | SNP        |
| chr6_32610401_G_A      | 32610401 | 0.39 | 0.26 | 0.59 | 1.04E-05 | 0.30 | 0.27 | 0.36 | SNP        |
| chr6_32603798_A_T      | 32603798 | 0.40 | 0.27 | 0.60 | 1.10E-05 | 0.30 | 0.26 | 0.37 | SNP        |
| chr6_33049979_A_G      | 33049979 | 0.41 | 0.28 | 0.61 | 1.12E-05 | 0.10 | 0.07 | 0.16 | SNP        |
| chr6_33049983_C_T      | 33049983 | 0.41 | 0.28 | 0.61 | 1.12E-05 | 0.10 | 0.07 | 0.16 | SNP        |
| chr6_33053396_A_G      | 33053396 | 0.36 | 0.22 | 0.57 | 1.60E-05 | 0.07 | 0.05 | 0.13 | SNP        |
| chr6_32559213_A_T      | 32559213 | 0.40 | 0.26 | 0.60 | 1.61E-05 | 0.29 | 0.25 | 0.35 | SNP        |
| chr6_33048542_C_T      | 33048542 | 0.55 | 0.42 | 0.72 | 1.71E-05 | 0.29 | 0.24 | 0.37 | SNP        |
| chr6_33048459_T_G      | 33048459 | 0.39 | 0.25 | 0.60 | 1.77E-05 | 0.09 | 0.06 | 0.14 | SNP        |
| chr6_33048461_T_A      | 33048461 | 0.39 | 0.26 | 0.60 | 2.01E-05 | 0.09 | 0.06 | 0.14 | SNP        |
| chr6_32606616_A_T      | 32606616 | 0.42 | 0.28 | 0.62 | 2.06E-05 | 0.33 | 0.30 | 0.39 | SNP        |
| chr6_33048457_C_G      | 33048457 | 0.40 | 0.26 | 0.61 | 2.19E-05 | 0.09 | 0.06 | 0.14 | SNP        |
| chr6_33050144_C_T      | 33050144 | 0.34 | 0.20 | 0.56 | 2.70E-05 | 0.06 | 0.04 | 0.11 | SNP        |
| chr6_33050394_G_A      | 33050394 | 0.34 | 0.20 | 0.56 | 2.86E-05 | 0.06 | 0.04 | 0.11 | SNP        |
| chr6_33050463_C_G      | 33050463 | 0.34 | 0.20 | 0.56 | 2.88E-05 | 0.06 | 0.04 | 0.11 | SNP        |
| chr6_32608286_T_C      | 32608286 | 0.40 | 0.26 | 0.61 | 3.11E-05 | 0.31 | 0.27 | 0.38 | SNP        |
| chr6_33053812_A_G      | 33053812 | 0.38 | 0.24 | 0.60 | 3.25E-05 | 0.08 | 0.05 | 0.13 | SNP        |
| chr6_33053942_T_C      | 33053942 | 0.38 | 0.24 | 0.60 | 3.25E-05 | 0.08 | 0.05 | 0.13 | SNP        |
| chr6_33054861_A_G      | 33054861 | 0.38 | 0.24 | 0.60 | 3.25E-05 | 0.08 | 0.05 | 0.13 | SNP        |
| chr6_33047466_T_C      | 33047466 | 0.38 | 0.24 | 0.61 | 4.42E-05 | 0.07 | 0.05 | 0.13 | SNP        |
| chr6_33095615_T_C      | 33095615 | 0.53 | 0.39 | 0.72 | 4.55E-05 | 0.23 | 0.19 | 0.31 | SNP        |
| chr6_3305078_A_G       | 3305078  | 0.43 | 0.29 | 0.65 | 4.79E-05 | 0.30 | 0.27 | 0.36 | SNP        |
| chr6_33048040_C_T      | 33048040 | 0.37 | 0.22 | 0.61 | 9.05E-05 | 0.10 | 0.07 | 0.15 | SNP        |
| chr6_33046742_T_C      | 33046742 | 0.37 | 0.23 | 0.60 | 6.02E-05 | 0.07 | 0.04 | 0.11 | SNP        |
| chr6_33048466_G_T      | 33048466 | 0.37 | 0.22 | 0.60 | 6.32E-05 | 0.07 | 0.04 | 0.11 | SNP        |
| chr6_33048467_G_T      | 33048467 | 0.37 | 0.22 | 0.60 | 6.32E-05 | 0.07 | 0.04 | 0.11 | SNP        |
| chr6_33590009_A_T      | 33590009 | 0.29 | 0.16 | 0.53 | 6.86E-05 | 0.05 | 0.03 | 0.08 | SNP        |
| chr6_33054074_C_T      | 33054074 | 0.39 | 0.24 | 0.62 | 7.17E-05 | 0.07 | 0.05 | 0.12 | SNP        |
| chr6_33059801_C_T      | 33059801 | 0.54 | 0.40 | 0.73 | 8.58E-05 | 0.23 | 0.19 | 0.30 | SNP        |
| chr6_33050084_C_T      | 33050084 | 0.37 | 0.22 | 0.61 | 9.01E-05 | 0.06 | 0.04 | 0.09 | SNP        |
| chr6_33050325_A_C      | 33050325 | 0.37 | 0.22 | 0.61 | 9.01E-05 | 0.06 | 0.04 | 0.11 | SNP        |
| chr6_33054145_A_G      | 33054145 | 0.37 | 0.22 | 0.61 | 9.01E-05 | 0.06 | 0.04 | 0.11 | SNP        |
| chr6_33045147_A_T      | 33045147 | 0.53 | 0.38 | 0.73 | 9.27E-05 | 0.22 | 0.18 | 0.28 | SNP        |
| chr6_32559575_A_G      | 32559575 | 0.43 | 0.27 | 0.65 | 0.00011  | 0.27 | 0.24 | 0.32 | SNP        |
| chr6_33050036_T_C      | 33050036 | 0.38 | 0.23 | 0.62 | 0.00013  | 0.06 | 0.04 | 0.11 | SNP        |
| chr6_32551665_A_G      | 32551665 | 0.45 | 0.30 | 0.68 | 0.00014  | 0.28 | 0.24 | 0.34 | SNP        |
| chr6_33046915_T_A      | 33046915 | 0.38 | 0.23 | 0.62 | 0.00014  | 0.06 | 0.04 | 0.11 | SNP        |
| chr6_32635954_G_A      | 32635954 | 0.47 | 0.32 | 0.69 | 0.00015  | 0.22 | 0.19 | 0.28 | SNP        |
| chr6_33046726_T_C      | 33046726 | 0.38 | 0.23 | 0.63 | 0.00015  | 0.06 | 0.04 | 0.11 | SNP        |
| chr6_33047612_G_C      | 33047612 | 0.38 | 0.23 | 0.63 | 0.00015  | 0.06 | 0.04 | 0.11 | SNP        |
| chr6_33596664_A_C      | 33596664 | 0.31 | 0.16 | 0.56 | 0.00016  | 0.05 | 0.03 | 0.08 | SNP        |
| chr6_32603660_T_C      | 32603660 | 0.53 | 0.38 | 0.74 | 0.00017  | 0.41 | 0.38 | 0.49 | SNP        |
| chr6_33053352_C_T      | 33053352 | 0.41 | 0.25 | 0.65 | 0.00017  | 0.07 | 0.05 | 0.12 | SNP        |
| chr6_32559648_A_G      | 32559648 | 0.46 | 0.30 | 0.69 | 0.00018  | 0.30 | 0.27 | 0.36 | SNP        |
| chr6_33095636_A_G      | 33095636 | 0.56 | 0.41 | 0.76 | 0.00018  | 0.23 | 0.19 | 0.30 | SNP        |
| chr6_32559710_C_T      | 32559710 | 0.43 | 0.28 | 0.67 | 0.00019  | 0.30 | 0.27 | 0.36 | SNP        |
| chr6_32605583_A_G      | 32605583 | 0.53 | 0.38 | 0.74 | 0.00019  | 0.41 | 0.37 | 0.48 | SNP        |
| chr6_32605132_T_C      | 32605132 | 0.48 | 0.33 | 0.71 | 0.00020  | 0.36 | 0.33 | 0.42 | SNP        |
| chr6_32487677_T_C      | 32487677 | 0.42 | 0.26 | 0.66 | 0.00020  | 0.25 | 0.22 | 0.31 | SNP        |
| chr6_32611467_A_C      | 32611467 | 0.45 | 0.30 | 0.68 | 0.00020  | 0.28 | 0.25 | 0.34 | SNP        |
| chr6_33048102_C_T      | 33048102 | 0.36 | 0.21 | 0.62 | 0.00021  | 0.06 | 0.04 | 0.10 | SNP        |
| chr6_33095836_G_A      | 33095836 | 0.56 | 0.41 | 0.76 | 0.00024  | 0.23 | 0.19 | 0.30 | SNP        |
| chr6_33048606_G_C      | 33048606 | 0.36 | 0.21 | 0.62 | 0.00025  | 0.07 | 0.05 | 0.11 | SNP        |
| chr6_33178010_G_T      | 33178010 | 0.48 | 0.32 | 0.71 | 0.00030  | 0.10 | 0.08 | 0.16 | SNP        |
| chr6_33041734_T_C      | 33041734 | 0.42 | 0.26 | 0.67 | 0.00030  | 0.08 | 0.05 | 0.11 | SNP        |
| chr6_33166034_A_G      | 33166034 | 0.46 | 0.30 | 0.70 | 0.00034  | 0.10 | 0.07 | 0.15 | SNP        |
| chr6_33095684_A_G      | 33095684 | 0.58 | 0.43 | 0.78 | 0.00036  | 0.24 | 0.20 | 0.30 | SNP        |
| chr6_33045558_G_A      | 33045558 | 0.57 | 0.41 | 0.77 | 0.00037  | 0.20 | 0.17 | 0.25 | SNP        |
| chr6_33048628_A_C      | 33048628 | 0.37 | 0.22 | 0.64 | 0.00037  | 0.07 | 0.05 | 0.11 | SNP        |
| chr6_32629259_T_C      | 32629259 | 0.49 | 0.33 | 0.72 | 0.00038  | 0.23 | 0.20 | 0.28 | SNP        |
| chr6_32628195_A_G      | 32628195 | 0.36 | 0.20 | 0.62 | 0.00040  | 0.05 | 0.03 | 0.09 | SNP        |
| chr6_33095555_T_A      | 33095555 | 0.37 | 0.21 | 0.64 | 0.00041  | 0.05 | 0.04 | 0.09 | SNP        |
| chr6_33032851_T_C      | 33032851 | 0.43 | 0.27 | 0.69 | 0.00041  | 0.08 | 0.06 | 0.12 | SNP        |
| chr6_33037199_G_A      | 33037199 | 0.43 | 0.27 | 0.69 | 0.00041  | 0.08 | 0.06 | 0.12 | SNP        |
| chr6_32629403_C_T      | 32629403 | 0.50 | 0.34 | 0.73 | 0.00045  | 0.23 | 0.20 | 0.28 | SNP        |
| chr6_33033274_T_C      | 33033274 | 0.44 | 0.27 | 0.69 | 0.00048  | 0.08 | 0.06 | 0.12 | SNP        |
| chr6_31237605_G_A      | 31237605 | 1.83 | 1.31 | 2.58 | 0.00052  | 0.22 | 0.25 | 0.16 | SNP        |
| chr6_32609094_C_T      | 32609094 | 0.54 | 0.38 | 0.76 | 0.00054  | 0.41 | 0.37 | 0.46 | SNP        |
| chr6_33095748_C_G      | 33095748 | 0.59 | 0.43 | 0.79 | 0.00054  | 0.23 | 0.20 | 0.30 | SNP        |
| chr6_33547440_G_C      | 33547440 | 1.72 | 1.27 | 2.36 | 0.00055  | 0.43 | 0.47 | 0.35 | SNP        |
| chr6_33095752_G_A      | 33095752 | 0.38 | 0.23 | 0.66 | 0.00056  | 0.05 | 0.04 | 0.09 | SNP        |
| chr6_33160425_G_T      | 33160425 | 0.48 | 0.32 | 0.73 | 0.00056  | 0.09 | 0.07 | 0.14 | SNP        |
| chr6_33095737_G_A      | 33095737 | 0.59 | 0.43 | 0.79 | 0.00057  | 0.23 | 0.20 | 0.30 | SNP        |
| chr6_33043520_C_G      | 33043520 | 0.44 | 0.28 | 0.70 | 0.00060  | 0.08 | 0.06 | 0.11 | SNP        |
| chr6_33048380_G_A      | 33048380 | 0.40 | 0.24 | 0.67 | 0.00061  | 0.06 | 0.04 | 0.10 | SNP        |
| chr6_33143756_A_G      | 33143756 | 0.50 | 0.33 | 0.74 | 0.00066  | 0.10 | 0.08 | 0.14 | SNP        |
| chr6_33046752_G_C      | 33046752 | 0.40 | 0.24 | 0.68 | 0.00066  | 0.06 | 0.04 | 0.10 | SNP        |
| chr6_33037557_C_T      | 33037557 | 0.26 | 0.12 | 0.56 | 0.00068  | 0.03 | 0.02 | 0.05 | SNP        |
| chr6_33037560_G_A      | 33037560 | 0.26 | 0.12 | 0.56 | 0.00068  | 0.03 | 0.02 | 0.05 | SNP        |
| xHLA_2field_DQB1_03_02 | 32627244 | 0.48 | 0.31 | 0.73 | 0.00070  | 0.22 | 0.19 | 0.29 | HLA (xHLA) |
| chr6_33037522_T_C      | 33037522 | 0.35 | 0.19 | 0.64 | 0.00072  | 0.04 | 0.03 | 0.07 | SNP        |
| chr6_33033313_G_T      | 33033313 | 0.28 | 0.13 | 0.57 | 0.00074  | 0.03 | 0.02 | 0.05 | SNP        |
| chr6_33039681_A_G      | 33039681 | 0.29 | 0.14 | 0.59 | 0.00076  | 0.03 | 0.02 | 0.05 | SNP        |
| chr6_33039694_G_T      | 33039694 | 0.29 | 0.14 | 0.59 | 0.00076  | 0.03 | 0.02 | 0.05 | SNP        |
| chr6_33039597_T_A      | 33039597 | 0.29 | 0.14 | 0.59 | 0.00076  | 0.03 | 0.02 | 0.05 | SNP        |
| chr6_33040044_A_G      | 33040044 | 0.29 | 0.14 | 0.59 | 0.00076  | 0.03 | 0.02 | 0.05 | SNP        |
| chr6_33040654_A_G      | 33040654 | 0.29 | 0.14 | 0.59 | 0.00076  | 0.03 | 0.02 | 0.05 | SNP        |
| chr6_33042368_A_G      | 33042368 | 0.29 | 0.14 | 0.59 | 0.00076  | 0.03 | 0.02 | 0.05 | SNP        |
| chr6_33042406_C_G      | 33042406 | 0.29 | 0.14 | 0.59 | 0.00076  | 0.03 | 0.02 | 0.05 | SNP        |
| chr6_33042492_T_C      | 33042492 | 0.29 | 0.14 | 0.59 | 0.00076  | 0.03 | 0.02 | 0.05 | SNP        |
| chr6_33042880_A_G      | 33042880 | 0.29 | 0.14 | 0.59 | 0.00076  | 0.03 | 0.02 | 0.05 | SNP        |
| chr6_33044188_T_A      | 33044188 | 0.29 | 0.14 | 0.59 | 0.00076  | 0.03 | 0.02 | 0.05 | SNP        |
| chr6_33044258_G_A      | 33044258 | 0.29 | 0.14 | 0.59 | 0.00076  | 0.03 | 0.02 | 0.05 | SNP        |
| chr6_33044388_T_C      | 33044388 | 0.29 | 0.14 | 0.59 | 0.00076  | 0.03 | 0.02 | 0.05 | SNP        |
| chr6_32559702_A_G      | 32559702 | 0.47 | 0.30 | 0.73 | 0.00077  | 0.31 | 0.28 | 0.36 | SNP        |
| chr6_32369488_G_A      | 32369488 | 0.47 | 0.30 | 0.73 | 0.00082  | 0.10 | 0.08 | 0.14 | SNP        |
| chr6_33036959_G_A      | 33036959 | 0.35 | 0.18 | 0.64 | 0.00082  | 0.04 | 0.03 | 0.07 | SNP        |
| chr6_32782030_A_C      | 32782030 | 0.56 | 0.39 | 0.78 | 0.00083  | 0.19 | 0.16 | 0.24 | SNP        |
| chr6_33041226_C_T      | 33041226 | 0.37 | 0.20 | 0.66 | 0.00084  | 0.04 | 0.03 | 0.07 | SNP        |
| chr6_33039606_C_T      | 33039606 | 0.37 | 0.20 | 0.66 | 0.00087  | 0.04 | 0.03 | 0.07 | SNP        |
| chr6_33039686_T_C      | 33039686 | 0.37 | 0.20 | 0.66 | 0.00087  | 0.04 | 0.03 | 0.07 | SNP        |
| chr6_33039719_A_G      | 33039719 | 0.37 | 0.20 | 0.66 | 0.00087  | 0.04 | 0.03 | 0.07 | SNP        |
| chr6_33039767_A_G      | 33039767 | 0.37 | 0.20 | 0.66 | 0.00087  | 0.04 | 0.03 | 0.07 | SNP        |
| chr6_33039837_G_A      | 33039837 | 0.37 | 0.20 | 0.66 | 0.00087  | 0.04 | 0.03 | 0.07 | SNP        |
| chr6_33039980_A_G      | 33039980 | 0.37 | 0.20 | 0.66 | 0.00087  | 0.04 | 0.03 | 0.07 | SNP        |
| chr6_33040596_A_G      | 33040596 | 0.37 | 0.20 | 0.66 | 0.00087  | 0.04 | 0.03 | 0.07 | SNP        |
| chr6_33040715_G_A      | 33040715 | 0.37 | 0.20 | 0.66 | 0.00087  | 0.04 | 0.03 | 0.07 | SNP        |
| chr6_33040736_T_C      | 33040736 | 0.37 | 0.20 | 0.66 | 0.00087  | 0.04 | 0.03 | 0.07 | SNP        |
| chr6_33040744_G_C      | 33040744 | 0.37 | 0.20 | 0.66 | 0.00087  | 0.04 | 0.03 | 0.07 | SNP        |
| chr6_33040781_A_G      | 33040781 | 0.37 | 0.20 | 0.66 | 0.00087  | 0.04 | 0.03 | 0.07 | SNP        |
| chr6_33040798_T_C      | 33040798 | 0.37 | 0.20 | 0.66 |          |      |      |      |            |

|                   |          |      |      |       |         |      |      |      |     |
|-------------------|----------|------|------|-------|---------|------|------|------|-----|
| chr6_33041186_G_A | 33041186 | 0.38 | 0.20 | 0.67  | 0.00113 | 0.04 | 0.03 | 0.07 | SNP |
| chr6_33095516_G_A | 33095516 | 0.57 | 0.41 | 0.80  | 0.00116 | 0.23 | 0.19 | 0.29 | SNP |
| chr6_31237087_G_A | 31237087 | 0.31 | 1.41 | 2.75  | 0.00111 | 2.10 | 0.13 | 0.06 | SNP |
| chr6_33032865_A_C | 33032865 | 0.37 | 0.20 | 0.67  | 0.00120 | 0.04 | 0.03 | 0.07 | SNP |
| chr6_33033058_T_C | 33033058 | 0.37 | 0.20 | 0.67  | 0.00120 | 0.04 | 0.03 | 0.07 | SNP |
| chr6_33033146_T_C | 33033146 | 0.37 | 0.20 | 0.67  | 0.00120 | 0.04 | 0.03 | 0.07 | SNP |
| chr6_33033170_T_C | 33033170 | 0.37 | 0.20 | 0.67  | 0.00120 | 0.04 | 0.03 | 0.07 | SNP |
| chr6_33033177_G_A | 33033177 | 0.37 | 0.20 | 0.67  | 0.00120 | 0.04 | 0.03 | 0.07 | SNP |
| chr6_33033178_G_A | 33033178 | 0.37 | 0.20 | 0.67  | 0.00120 | 0.04 | 0.03 | 0.07 | SNP |
| chr6_33036003_G_C | 33036003 | 0.35 | 1.18 | 0.65  | 0.00121 | 0.04 | 0.03 | 0.06 | SNP |
| chr6_33033202_C_T | 33033202 | 0.37 | 0.20 | 0.67  | 0.00124 | 0.04 | 0.03 | 0.07 | SNP |
| chr6_33033188_C_T | 33033188 | 0.37 | 0.20 | 0.67  | 0.00124 | 0.04 | 0.03 | 0.07 | SNP |
| chr6_32610349_C_A | 32610349 | 0.59 | 0.42 | 0.81  | 0.00128 | 0.47 | 0.44 | 0.53 | SNP |
| chr6_33036951_A_G | 33036951 | 0.36 | 0.19 | 0.67  | 0.00132 | 0.04 | 0.03 | 0.07 | SNP |
| chr6_32798283_T_C | 32798283 | 0.49 | 0.31 | 0.75  | 0.00135 | 0.09 | 0.08 | 0.13 | SNP |
| chr6_33037675_C_A | 33037675 | 0.38 | 0.21 | 0.68  | 0.00137 | 0.04 | 0.03 | 0.07 | SNP |
| chr6_33037690_G_C | 33037690 | 0.38 | 0.21 | 0.68  | 0.00137 | 0.04 | 0.03 | 0.07 | SNP |
| chr6_32407068_G_A | 32407068 | 0.28 | 0.12 | 0.60  | 0.00138 | 0.03 | 0.01 | 0.05 | SNP |
| chr6_33033357_C_G | 33033357 | 0.36 | 0.19 | 0.67  | 0.00139 | 0.04 | 0.03 | 0.07 | SNP |
| chr6_33037768_G_A | 33037768 | 0.38 | 0.21 | 0.68  | 0.00142 | 0.04 | 0.03 | 0.07 | SNP |
| chr6_33143136_G_A | 33143136 | 0.43 | 0.25 | 0.72  | 0.00143 | 0.08 | 0.06 | 0.12 | SNP |
| chr6_32551700_T_G | 32551700 | 0.50 | 0.33 | 0.76  | 0.00145 | 0.25 | 0.22 | 0.30 | SNP |
| chr6_33041064_C_A | 33041064 | 0.44 | 0.27 | 0.73  | 0.00160 | 0.06 | 0.04 | 0.10 | SNP |
| chr6_33546825_T_G | 33546825 | 1.58 | 1.19 | 2.11  | 0.00164 | 1.43 | 0.46 | 0.36 | SNP |
| chr6_32798350_A_C | 32798350 | 0.49 | 0.31 | 0.76  | 0.00166 | 0.09 | 0.08 | 0.13 | SNP |
| chr6_32603939_G_T | 32603939 | 1.82 | 1.26 | 2.65  | 0.00168 | 0.33 | 0.36 | 0.26 | SNP |
| chr6_33037579_A_T | 33037579 | 0.36 | 0.19 | 0.68  | 0.00170 | 0.04 | 0.03 | 0.06 | SNP |
| chr6_33037580_T_G | 33037580 | 0.36 | 0.19 | 0.68  | 0.00170 | 0.04 | 0.03 | 0.06 | SNP |
| chr6_33037294_T_C | 33037294 | 0.37 | 0.20 | 0.69  | 0.00171 | 0.04 | 0.03 | 0.07 | SNP |
| chr6_33037304_G_T | 33037304 | 0.37 | 0.20 | 0.69  | 0.00171 | 0.04 | 0.03 | 0.07 | SNP |
| chr6_33037419_G_A | 33037419 | 0.37 | 0.20 | 0.69  | 0.00171 | 0.04 | 0.03 | 0.07 | SNP |
| chr6_33037424_T_C | 33037424 | 0.37 | 0.20 | 0.69  | 0.00171 | 0.04 | 0.03 | 0.07 | SNP |
| chr6_31245534_A_G | 31245534 | 2.20 | 1.36 | 3.68  | 0.00181 | 0.10 | 0.12 | 0.06 | SNP |
| chr6_33039295_T_A | 33039295 | 0.38 | 0.21 | 0.70  | 0.00185 | 0.04 | 0.03 | 0.07 | SNP |
| chr6_33033266_T_A | 33033266 | 0.37 | 0.20 | 0.69  | 0.00193 | 0.04 | 0.03 | 0.06 | SNP |
| chr6_33095584_G_C | 33095584 | 1.95 | 1.29 | 3.02  | 0.00196 | 0.14 | 0.16 | 0.09 | SNP |
| chr6_31238522_C_T | 31238522 | 1.72 | 1.23 | 2.44  | 0.00199 | 0.22 | 0.25 | 0.19 | SNP |
| chr6_33032657_G_A | 33032657 | 0.37 | 0.20 | 0.69  | 0.00199 | 0.04 | 0.03 | 0.06 | SNP |
| chr6_33039729_T_G | 33039729 | 0.38 | 0.21 | 0.70  | 0.00202 | 0.04 | 0.03 | 0.07 | SNP |
| chr6_31236201_G_A | 31236201 | 2.15 | 1.34 | 3.57  | 0.00206 | 0.11 | 0.13 | 0.07 | SNP |
| chr6_32189032_T_C | 32189032 | 1.63 | 1.20 | 2.24  | 0.00206 | 0.32 | 0.35 | 0.27 | SNP |
| chr6_31240771_T_C | 31240771 | 2.14 | 1.34 | 3.56  | 0.00212 | 0.11 | 0.13 | 0.07 | SNP |
| chr6_31240932_C_A | 31240932 | 2.14 | 1.34 | 3.56  | 0.00212 | 0.11 | 0.13 | 0.07 | SNP |
| chr6_31241002_A_G | 31241002 | 2.14 | 1.34 | 3.56  | 0.00212 | 0.11 | 0.13 | 0.07 | SNP |
| chr6_33036085_G_C | 33036085 | 0.40 | 0.22 | 0.72  | 0.00218 | 0.04 | 0.03 | 0.07 | SNP |
| chr6_33036116_T_G | 33036116 | 0.40 | 0.22 | 0.72  | 0.00218 | 0.04 | 0.03 | 0.07 | SNP |
| chr6_33036132_A_G | 33036132 | 0.40 | 0.22 | 0.72  | 0.00218 | 0.04 | 0.03 | 0.07 | SNP |
| chr6_33036133_G_A | 33036133 | 0.40 | 0.22 | 0.72  | 0.00218 | 0.04 | 0.03 | 0.07 | SNP |
| chr6_33036853_A_C | 33036853 | 0.40 | 0.22 | 0.72  | 0.00218 | 0.04 | 0.03 | 0.07 | SNP |
| chr6_33036971_C_T | 33036971 | 0.40 | 0.22 | 0.72  | 0.00218 | 0.04 | 0.03 | 0.07 | SNP |
| chr6_33036999_T_C | 33036999 | 0.40 | 0.22 | 0.72  | 0.00218 | 0.04 | 0.03 | 0.07 | SNP |
| chr6_33037187_C_G | 33037187 | 0.40 | 0.22 | 0.72  | 0.00218 | 0.04 | 0.03 | 0.07 | SNP |
| chr6_33037279_A_G | 33037279 | 0.40 | 0.22 | 0.72  | 0.00218 | 0.04 | 0.03 | 0.07 | SNP |
| chr6_32605578_G_A | 32605578 | 1.79 | 1.24 | 2.61  | 0.00222 | 0.33 | 0.36 | 0.26 | SNP |
| chr6_33037142_A_G | 33037142 | 0.40 | 0.22 | 0.72  | 0.00222 | 0.04 | 0.03 | 0.07 | SNP |
| chr6_32406122_G_A | 32406122 | 4.41 | 1.87 | 12.99 | 0.00223 | 0.04 | 0.05 | 0.01 | SNP |
| chr6_31244082_C_T | 31244082 | 2.16 | 1.34 | 3.63  | 0.00227 | 0.10 | 0.12 | 0.06 | SNP |
| chr6_33040478_C_A | 33040478 | 0.33 | 0.16 | 0.66  | 0.00233 | 0.03 | 0.02 | 0.05 | SNP |
| chr6_32408932_G_A | 32408932 | 4.37 | 1.85 | 12.89 | 0.00235 | 0.04 | 0.05 | 0.01 | SNP |
| chr6_32411573_C_T | 32411573 | 4.37 | 1.85 | 12.89 | 0.00235 | 0.04 | 0.05 | 0.01 | SNP |
| chr6_33039503_C_T | 33039503 | 0.39 | 0.21 | 0.71  | 0.00245 | 0.04 | 0.03 | 0.07 | SNP |
| chr6_32441100_C_A | 32441100 | 1.86 | 1.26 | 2.82  | 0.00248 | 0.27 | 0.28 | 0.24 | SNP |
| chr6_33033351_G_T | 33033351 | 0.38 | 0.20 | 0.71  | 0.00257 | 0.04 | 0.03 | 0.07 | SNP |
| chr6_33035865_C_T | 33035865 | 1.91 | 1.27 | 2.95  | 0.00271 | 0.14 | 0.16 | 0.09 | SNP |
| chr6_33041073_A_G | 33041073 | 0.38 | 0.19 | 0.71  | 0.00272 | 0.04 | 0.03 | 0.06 | SNP |
| chr6_33132365_T_C | 33132365 | 0.22 | 0.07 | 0.57  | 0.00281 | 0.02 | 0.01 | 0.04 | SNP |
| chr6_33556605_G_C | 33556605 | 0.60 | 0.43 | 0.84  | 0.00306 | 0.17 | 0.15 | 0.22 | SNP |
| chr6_31248819_C_T | 31248819 | 2.22 | 1.33 | 3.86  | 0.00309 | 0.10 | 0.12 | 0.06 | SNP |
| chr6_31549556_T_G | 31549556 | 3.49 | 1.62 | 8.73  | 0.00319 | 0.04 | 0.06 | 0.02 | SNP |
| chr6_33036210_G_T | 33036210 | 0.41 | 0.22 | 0.74  | 0.00335 | 0.04 | 0.03 | 0.07 | SNP |
| chr6_33036233_A_G | 33036233 | 0.41 | 0.22 | 0.74  | 0.00335 | 0.04 | 0.03 | 0.07 | SNP |
| chr6_33036242_T_C | 33036242 | 0.41 | 0.22 | 0.74  | 0.00335 | 0.04 | 0.03 | 0.07 | SNP |
| chr6_33036287_G_A | 33036287 | 0.41 | 0.22 | 0.74  | 0.00335 | 0.04 | 0.03 | 0.07 | SNP |
| chr6_33036288_G_A | 33036288 | 0.41 | 0.22 | 0.74  | 0.00335 | 0.04 | 0.03 | 0.07 | SNP |
| chr6_33036312_A_G | 33036312 | 0.41 | 0.22 | 0.74  | 0.00335 | 0.04 | 0.03 | 0.07 | SNP |
| chr6_33035980_T_A | 33035980 | 0.38 | 0.20 | 0.72  | 0.00340 | 0.04 | 0.03 | 0.06 | SNP |
| chr6_33174783_A_G | 33174783 | 0.59 | 0.42 | 0.84  | 0.00346 | 0.14 | 0.12 | 0.19 | SNP |
| chr6_33035974_A_G | 33035974 | 0.38 | 0.20 | 0.73  | 0.00354 | 0.04 | 0.03 | 0.06 | SNP |
| chr6_33037865_G_C | 33037865 | 0.39 | 0.20 | 0.73  | 0.00370 | 0.04 | 0.03 | 0.06 | SNP |
| chr6_33039405_C_G | 33039405 | 0.41 | 0.22 | 0.74  | 0.00374 | 0.04 | 0.03 | 0.06 | SNP |
| chr6_33050083_C_A | 33050083 | 0.26 | 0.10 | 0.63  | 0.00379 | 0.02 | 0.01 | 0.04 | SNP |
| chr6_31240959_C_G | 31240959 | 1.60 | 1.17 | 2.22  | 0.00381 | 0.24 | 0.27 | 0.19 | SNP |
| chr6_32628913_G_T | 32628913 | 0.54 | 0.35 | 0.82  | 0.00384 | 0.27 | 0.24 | 0.31 | SNP |
| chr6_32184705_A_G | 32184705 | 0.61 | 0.44 | 0.85  | 0.00392 | 0.32 | 0.29 | 0.39 | SNP |
| chr6_33048348_G_A | 33048348 | 0.35 | 0.17 | 0.71  | 0.00402 | 0.03 | 0.02 | 0.05 | SNP |
| chr6_32362447_C_T | 32362447 | 4.06 | 1.71 | 12.02 | 0.00408 | 0.04 | 0.05 | 0.01 | SNP |
| chr6_32373796_A_G | 32373796 | 4.06 | 1.71 | 12.02 | 0.00408 | 0.04 | 0.05 | 0.01 | SNP |
| chr6_33037891_C_T | 33037891 | 0.36 | 0.18 | 0.72  | 0.00419 | 0.04 | 0.02 | 0.06 | SNP |
| chr6_32376471_A_C | 32376471 | 1.77 | 1.21 | 2.65  | 0.00424 | 0.18 | 0.20 | 0.14 | SNP |
| chr6_33036290_G_A | 33036290 | 1.58 | 1.16 | 2.17  | 0.00429 | 0.24 | 0.27 | 0.19 | SNP |
| chr6_33641379_C_T | 33641379 | 1.45 | 1.13 | 1.88  | 0.00430 | 0.47 | 0.50 | 0.40 | SNP |
| chr6_32408917_C_T | 32408917 | 1.70 | 1.19 | 2.47  | 0.00432 | 0.28 | 0.30 | 0.25 | SNP |
| chr6_33543409_A_C | 33543409 | 1.52 | 1.14 | 2.03  | 0.00443 | 0.44 | 0.47 | 0.37 | SNP |
| chr6_31669295_A_G | 31669295 | 3.37 | 1.55 | 8.48  | 0.00447 | 0.04 | 0.05 | 0.02 | SNP |
| chr6_33158189_C_A | 33158189 | 1.45 | 1.12 | 1.87  | 0.00448 | 0.45 | 0.48 | 0.39 | SNP |
| chr6_33039804_C_T | 33039804 | 1.55 | 1.15 | 2.11  | 0.00448 | 0.25 | 0.28 | 0.20 | SNP |
| chr6_32299592_G_A | 32299592 | 1.70 | 1.19 | 2.49  | 0.00460 | 0.29 | 0.33 | 0.23 | SNP |
| chr6_33033390_A_T | 33033390 | 0.35 | 0.17 | 0.72  | 0.00473 | 0.04 | 0.02 | 0.06 | SNP |
| chr6_32559673_T_G | 32559673 | 0.61 | 0.43 | 0.86  | 0.00477 | 0.38 | 0.35 | 0.44 | SNP |
| chr6_33045823_A_G | 33045823 | 0.40 | 0.21 | 0.75  | 0.00484 | 0.04 | 0.03 | 0.06 | SNP |
| chr6_33036401_C_T | 33036401 | 0.41 | 0.22 | 0.76  | 0.00485 | 0.04 | 0.03 | 0.06 | SNP |
| chr6_32610314_T_C | 32610314 | 1.70 | 1.18 | 2.47  | 0.00486 | 0.32 | 0.36 | 0.26 | SNP |
| chr6_33036617_C_T | 33036617 | 0.41 | 0.22 | 0.76  | 0.00490 | 0.04 | 0.03 | 0.06 | SNP |
| chr6_33036630_G_T | 33036630 | 0.41 | 0.22 | 0.76  | 0.00490 | 0.04 | 0.03 | 0.06 | SNP |
| chr6_33036631_A_C | 33036631 | 0.41 | 0.22 | 0.76  | 0.00490 | 0.04 | 0.03 | 0.06 | SNP |
| chr6_32628148_C_T | 32628148 | 0.56 | 0.37 | 0.84  | 0.00499 | 0.23 | 0.21 | 0.27 | SNP |
| chr6_33136638_A_G | 33136638 | 1.45 | 1.12 | 1.88  | 0.00500 | 0.43 | 0.46 | 0.37 | SNP |
| chr6_33077588_A_G | 33077588 | 0.29 | 0.11 | 0.67  | 0.00507 | 0.02 | 0.02 | 0.05 | SNP |
| chr6_32409056_G_A | 32409056 | 1.64 | 1.17 | 2.35  | 0.00521 | 0.30 | 0.31 | 0.27 | SNP |
| chr6_33079626_T_C | 33079626 | 0.24 | 0.09 | 0.65  | 0.00523 | 0.02 | 0.01 | 0.03 | SNP |
| chr6_32185796_C_T | 32185796 | 3.91 | 1.64 | 11.61 | 0.00530 | 0.04 | 0.05 | 0.01 | SNP |
| chr6_31237776_C_T | 31237776 | 1.59 | 1.15 | 2.21  | 0.00537 | 0.24 | 0.26 | 0.1  |     |

|                        |           |      |       |         |         |      |      |            |
|------------------------|-----------|------|-------|---------|---------|------|------|------------|
| chr6_31751071_C_T      | 4.44      | 1.69 | 15.28 | 0.00642 | 0.03    | 0.04 | 0.01 | SNP        |
| xHLA_2field_DPB1_02_01 | 33043767  | 0.54 | 0.35  | 0.94    | 0.00648 | 0.08 | 0.06 | HLA (xHLA) |
| chr6_33037866_C_T      | 33037866  | 0.41 | 0.21  | 0.78    | 0.00663 | 0.04 | 0.03 | SNP        |
| chr6_31592064_C_T      | 31592064  | 3.85 | 1.57  | 11.60   | 0.00694 | 0.04 | 0.05 | SNP        |
| chr6_32782112_C_T      | 32782112  | 4.35 | 1.67  | 14.94   | 0.00698 | 0.03 | 0.04 | SNP        |
| chr6_32306922_T_C      | 32306922  | 3.38 | 1.50  | 9.11    | 0.00706 | 0.04 | 0.05 | SNP        |
| chr6_31241127_T_C      | 31241127  | 1.95 | 1.22  | 3.24    | 0.00715 | 0.10 | 0.12 | SNP        |
| chr6_33048661_A_G      | 33048661  | 0.51 | 0.31  | 0.83    | 0.00717 | 0.08 | 0.07 | SNP        |
| chr6_33033388_A_C      | 33033388  | 0.38 | 0.19  | 0.77    | 0.00718 | 0.04 | 0.03 | SNP        |
| chr6_32439964_T_G      | 32439964  | 1.72 | 1.16  | 2.57    | 0.00719 | 0.34 | 0.35 | SNP        |
| chr6_33048921_A_G      | 33048921  | 0.41 | 0.21  | 0.78    | 0.00720 | 0.04 | 0.03 | SNP        |
| chr6_33141280_G_A      | 33141280  | 0.53 | 0.33  | 0.84    | 0.00727 | 0.08 | 0.06 | SNP        |
| chr6_32410576_C_T      | 32410576  | 1.61 | 1.14  | 2.30    | 0.00737 | 0.29 | 0.31 | SNP        |
| chr6_31465917_G_T      | 31465917  | 4.31 | 1.65  | 14.81   | 0.00743 | 0.03 | 0.04 | SNP        |
| chr6_31373445_T_C      | 31373445  | 3.78 | 1.55  | 11.35   | 0.00750 | 0.04 | 0.05 | SNP        |
| chr6_33036717_C_T      | 33036717  | 0.41 | 0.22  | 0.79    | 0.00767 | 0.04 | 0.03 | SNP        |
| chr6_33163451_A_G      | 33163451  | 1.42 | 1.10  | 1.84    | 0.00770 | 0.45 | 0.48 | SNP        |
| chr6_31241109_C_T      | 31241109  | 1.95 | 1.21  | 3.24    | 0.00780 | 0.10 | 0.12 | SNP        |
| chr6_33036388_C_T      | 33036388  | 0.43 | 0.23  | 0.80    | 0.00783 | 0.04 | 0.03 | SNP        |
| chr6_33036394_G_A      | 33036394  | 0.43 | 0.23  | 0.80    | 0.00783 | 0.04 | 0.03 | SNP        |
| chr6_32604152_A_G      | 32604152  | 0.63 | 0.45  | 0.88    | 0.00786 | 0.47 | 0.48 | SNP        |
| chr6_32559124_T_C      | 32559124  | 0.61 | 0.42  | 0.88    | 0.00789 | 0.38 | 0.36 | SNP        |
| chr6_33140983_G_A      | 33140983  | 1.41 | 1.10  | 1.83    | 0.00793 | 0.45 | 0.48 | SNP        |
| chr6_33137403_T_G      | 33137403  | 1.40 | 1.09  | 1.80    | 0.00802 | 0.45 | 0.48 | SNP        |
| chr6_33036708_C_T      | 33036708  | 0.42 | 0.22  | 0.80    | 0.00807 | 0.04 | 0.03 | SNP        |
| chr6_33036709_A_G      | 33036709  | 0.42 | 0.22  | 0.80    | 0.00807 | 0.04 | 0.03 | SNP        |
| chr6_33169895_C_G      | 33169895  | 1.78 | 1.17  | 2.76    | 0.00816 | 0.13 | 0.15 | SNP        |
| chr6_32370684_A_G      | 32370684  | 0.61 | 0.42  | 0.88    | 0.00826 | 0.34 | 0.32 | SNP        |
| chr6_32603729_A_G      | 32603729  | 2.03 | 1.23  | 3.54    | 0.00841 | 0.09 | 0.10 | SNP        |
| chr6_33139475_G_T      | 33139475  | 1.42 | 1.10  | 1.85    | 0.00842 | 0.44 | 0.48 | SNP        |
| chr6_33137689_C_T      | 33137689  | 1.77 | 1.17  | 2.75    | 0.00855 | 0.13 | 0.14 | SNP        |
| chr6_33144466_C_A      | 33144466  | 0.32 | 0.13  | 0.73    | 0.00876 | 0.02 | 0.01 | SNP        |
| chr6_33158912_G_A      | 33158912  | 0.32 | 0.13  | 0.73    | 0.00876 | 0.02 | 0.01 | SNP        |
| chr6_33149152_C_G      | 33149152  | 0.53 | 0.32  | 0.85    | 0.00879 | 0.07 | 0.05 | SNP        |
| chr6_33139662_G_A      | 33139662  | 1.40 | 1.09  | 1.80    | 0.00885 | 0.45 | 0.48 | SNP        |
| chr6_32370835_C_T      | 32370835  | 0.64 | 0.45  | 0.89    | 0.00907 | 0.42 | 0.40 | SNP        |
| chr6_31628216_C_G      | 31628216  | 3.09 | 1.40  | 7.83    | 0.00907 | 0.04 | 0.05 | SNP        |
| chr6_33138015_T_C      | 33138015  | 0.32 | 0.13  | 0.74    | 0.00910 | 0.02 | 0.01 | SNP        |
| chr6_33151880_C_A      | 33151880  | 0.32 | 0.13  | 0.74    | 0.00910 | 0.02 | 0.01 | SNP        |
| chr6_32978587_C_A      | 32978587  | 0.37 | 0.17  | 0.77    | 0.00913 | 0.03 | 0.02 | SNP        |
| chr6_33045699_T_C      | 33045699  | 0.32 | 0.13  | 0.74    | 0.00918 | 0.02 | 0.01 | SNP        |
| chr6_33048539_T_A      | 33048539  | 0.37 | 0.17  | 0.77    | 0.00918 | 0.03 | 0.02 | SNP        |
| chr6_31323533_G_A      | 31323533  | 1.50 | 1.11  | 2.03    | 0.00932 | 0.40 | 0.42 | SNP        |
| chr6_32339076_A_G      | 32339076  | 1.64 | 1.14  | 2.40    | 0.00932 | 0.29 | 0.30 | SNP        |
| chr6_31546495_G_C      | 31546495  | 3.64 | 1.49  | 10.92   | 0.00935 | 0.03 | 0.04 | SNP        |
| chr6_32797488_T_C      | 32797488  | 0.65 | 0.47  | 0.90    | 0.00937 | 0.33 | 0.30 | SNP        |
| chr6_32322071_G_A      | 32322071  | 3.27 | 1.44  | 8.86    | 0.00948 | 0.04 | 0.05 | SNP        |
| chr6_31323116_C_T      | 31323116  | 2.88 | 1.36  | 6.86    | 0.00949 | 0.04 | 0.06 | SNP        |
| chr6_31478960_G_A      | 31478960  | 4.16 | 1.58  | 14.34   | 0.00950 | 0.03 | 0.04 | SNP        |
| chr6_32441396_A_G      | 32441396  | 1.63 | 1.13  | 2.37    | 0.00967 | 0.34 | 0.35 | SNP        |
| chr6_33145710_G_A      | 33145710  | 1.39 | 1.08  | 1.79    | 0.00973 | 0.45 | 0.48 | SNP        |
| chr6_33035982_G_A      | 33035982  | 0.41 | 0.21  | 0.81    | 0.00982 | 0.04 | 0.03 | SNP        |
| chr6_33144373_A_G      | 33144373  | 1.39 | 1.08  | 1.78    | 0.01007 | 0.45 | 0.48 | SNP        |
| chr6_31785228_C_G      | 31785228  | 1.80 | 1.16  | 2.85    | 0.01014 | 0.27 | 0.28 | SNP        |
| chr6_33037878_G_A      | 33037878  | 0.41 | 0.21  | 0.81    | 0.01017 | 0.04 | 0.03 | SNP        |
| chr6_33135392_G_A      | 33135392  | 1.48 | 1.10  | 2.01    | 0.01029 | 0.48 | 0.51 | SNP        |
| chr6_33142253_G_C      | 33142253  | 1.39 | 1.08  | 1.79    | 0.01043 | 0.45 | 0.48 | SNP        |
| chr6_33110671_G_C      | 33110671  | 0.66 | 0.48  | 0.91    | 0.01050 | 0.25 | 0.23 | SNP        |
| chr6_33132314_G_A      | 33132314  | 0.31 | 0.12  | 0.74    | 0.01051 | 0.02 | 0.01 | SNP        |
| chr6_31543758_G_A      | 31543758  | 3.58 | 1.46  | 10.75   | 0.01059 | 0.03 | 0.04 | SNP        |
| chr6_33048937_C_G      | 33048937  | 0.41 | 0.20  | 0.81    | 0.01066 | 0.03 | 0.02 | SNP        |
| chr6_31118511_T_G      | 31118511  | 0.66 | 0.48  | 0.91    | 0.01068 | 0.25 | 0.23 | SNP        |
| chr6_32303474_G_T      | 32303474  | 3.19 | 1.41  | 8.63    | 0.01079 | 0.04 | 0.05 | SNP        |
| chr6_33035986_T_C      | 33035986  | 0.42 | 0.21  | 0.82    | 0.01080 | 0.04 | 0.03 | SNP        |
| chr6_331236029_A_G     | 331236029 | 3.23 | 1.40  | 8.20    | 0.01105 | 0.04 | 0.05 | SNP        |
| chr6_32627818_C_A      | 32627818  | 0.64 | 0.45  | 0.90    | 0.01112 | 0.28 | 0.26 | SNP        |
| chr6_33139869_T_C      | 33139869  | 1.48 | 1.10  | 2.01    | 0.01115 | 0.29 | 0.31 | SNP        |
| xHLA_2field_DPB1_07_01 | 32546552  | 2.08 | 1.21  | 3.80    | 0.01119 | 0.08 | 0.10 | HLA (xHLA) |
| chr6_33141920_C_G      | 33141920  | 1.38 | 1.08  | 1.78    | 0.01122 | 0.45 | 0.48 | SNP        |
| chr6_33130430_G_A      | 33130430  | 0.64 | 0.45  | 0.90    | 0.01129 | 0.15 | 0.13 | SNP        |
| chr6_31464091_G_A      | 31464091  | 3.52 | 1.44  | 10.58   | 0.01146 | 0.03 | 0.04 | SNP        |
| chr6_31474020_C_T      | 31474020  | 3.52 | 1.44  | 10.58   | 0.01146 | 0.03 | 0.04 | SNP        |
| chr6_31235505_G_A      | 31235505  | 1.80 | 1.15  | 2.88    | 0.01162 | 0.23 | 0.26 | SNP        |
| chr6_33161661_G_A      | 33161661  | 1.38 | 1.08  | 1.77    | 0.01186 | 0.45 | 0.48 | SNP        |
| chr6_32608844_A_G      | 32608844  | 0.63 | 0.44  | 0.90    | 0.01188 | 0.37 | 0.34 | SNP        |
| chr6_33138498_C_T      | 33138498  | 1.39 | 1.08  | 1.80    | 0.01197 | 0.46 | 0.49 | SNP        |
| chr6_33047898_C_A      | 33047898  | 0.39 | 0.18  | 0.81    | 0.01200 | 0.03 | 0.02 | SNP        |
| chr6_32605067_C_G      | 32605067  | 1.94 | 1.18  | 3.34    | 0.01205 | 0.09 | 0.10 | SNP        |
| chr6_32609476_T_C      | 32609476  | 1.95 | 1.18  | 3.30    | 0.01223 | 0.09 | 0.10 | SNP        |
| chr6_31322108_T_G      | 31322108  | 3.17 | 1.37  | 8.64    | 0.01240 | 0.04 | 0.05 | SNP        |
| chr6_32605326_A_G      | 32605326  | 1.93 | 1.18  | 3.32    | 0.01252 | 0.09 | 0.10 | SNP        |
| chr6_33054378_G_A      | 33054378  | 0.36 | 0.16  | 0.79    | 0.01255 | 0.02 | 0.02 | SNP        |
| chr6_33054559_T_C      | 33054559  | 0.36 | 0.16  | 0.79    | 0.01255 | 0.02 | 0.02 | SNP        |
| chr6_33162215_C_A      | 33162215  | 1.37 | 1.07  | 1.77    | 0.01258 | 0.45 | 0.48 | SNP        |
| chr6_33542661_G_T      | 33542661  | 0.88 | 0.51  | 0.92    | 0.01261 | 0.23 | 0.20 | SNP        |
| chr6_33138693_C_T      | 33138693  | 1.47 | 0.99  | 2.01    | 0.01265 | 0.32 | 0.34 | SNP        |
| chr6_32796793_G_A      | 32796793  | 0.57 | 0.37  | 0.89    | 0.01271 | 0.09 | 0.07 | SNP        |
| chr6_33138955_A_G      | 33138955  | 1.37 | 1.07  | 1.76    | 0.01278 | 0.45 | 0.48 | SNP        |
| chr6_31246969_A_G      | 31246969  | 0.54 | 0.34  | 0.88    | 0.01286 | 0.09 | 0.08 | SNP        |
| chr6_32603936_A_G      | 32603936  | 1.68 | 1.12  | 2.55    | 0.01288 | 0.27 | 0.30 | SNP        |
| chr6_32605825_G_A      | 32605825  | 1.93 | 1.17  | 3.31    | 0.01295 | 0.09 | 0.10 | SNP        |
| chr6_32606266_T_C      | 32606266  | 1.93 | 1.17  | 3.32    | 0.01313 | 0.09 | 0.10 | SNP        |
| chr6_32604395_A_G      | 32604395  | 1.92 | 1.17  | 3.31    | 0.01316 | 0.09 | 0.10 | SNP        |
| chr6_32604431_A_T      | 32604431  | 1.92 | 1.17  | 3.31    | 0.01316 | 0.09 | 0.10 | SNP        |
| chr6_32406473_G_A      | 32406473  | 1.71 | 1.13  | 2.63    | 0.01316 | 0.23 | 0.23 | SNP        |
| chr6_32604924_C_T      | 32604924  | 1.94 | 1.17  | 3.36    | 0.01318 | 0.09 | 0.10 | SNP        |
| chr6_31322611_C_T      | 31322611  | 3.13 | 1.36  | 8.54    | 0.01332 | 0.04 | 0.05 | SNP        |
| chr6_31322987_C_T      | 31322987  | 3.13 | 1.36  | 8.54    | 0.01332 | 0.04 | 0.05 | SNP        |
| chr6_31323455_A_G      | 31323455  | 3.13 | 1.36  | 8.54    | 0.01332 | 0.04 | 0.05 | SNP        |
| chr6_31378257_G_A      | 31378257  | 3.13 | 1.36  | 8.54    | 0.01332 | 0.04 | 0.05 | SNP        |
| chr6_32604974_C_T      | 32604974  | 1.92 | 1.17  | 3.30    | 0.01342 | 0.09 | 0.10 | SNP        |
| chr6_32605689_C_A      | 32605689  | 1.92 | 1.17  | 3.30    | 0.01342 | 0.09 | 0.10 | SNP        |
| chr6_32604544_C_T      | 32604544  | 1.62 | 1.11  | 2.40    | 0.01342 | 0.32 | 0.35 | SNP        |
| chr6_32373698_G_T      | 32373698  | 0.66 | 0.47  | 0.92    | 0.01343 | 0.43 | 0.40 | SNP        |
| chr6_32610330_A_T      | 32610330  | 1.91 | 1.16  | 3.29    | 0.01391 | 0.09 | 0.10 | SNP        |
| chr6_32636521_G_A      | 32636521  | 0.63 | 0.44  | 0.91    | 0.01399 | 0.25 | 0.22 | SNP        |
| chr6_33143948_C_G      | 33143948  | 0.72 | 0.55  | 0.94    | 0.01487 | 0.37 | 0.35 | SNP        |
| chr6_31322690_A_G      | 31322690  | 3.10 | 1.34  | 8.47    | 0.01441 | 0.03 | 0.04 | SNP        |
| chr6_29910725_C_G      | 29910725  | 0.51 | 0.29  | 0.88    | 0.01446 | 0.08 | 0.07 | SNP        |
| chr6_31113214_C_A      | 31113214  | 0.67 | 0.48  | 0.92    | 0.01448 | 0.25 | 0.23 | SNP        |
| chr6_32341398_A_G      | 32341398  | 1.76 | 1.13  | 2.80    | 0.01448 | 0.13 | 0.14 | SNP        |
| chr6_32612326_C_T      | 32612326  | 0.64 | 0.45  | 0.92    | 0.01449 | 0.39 | 0.36 | SNP        |
| chr6_32559520_C_T      | 32559520  | 0.62 | 0.43  | 0.91    | 0.01460 | 0.39 | 0.37 | SNP        |
| chr6_32604644_G_A      | 32604644  | 0.62 | 0.42  | 0.91    | 0.01487 | 0.37 | 0.35 | SNP        |
| chr6_32364356_A_G      | 32364356  | 0.63 | 0.44  | 0.91    | 0.01489 | 0.34 | 0.32 | SNP        |
| chr6_32603897_A_G      | 32603897  | 1.93 | 1.16  | 3.35    | 0.01490 | 0.09 | 0.10 | SNP        |
| chr6_32606779_G_A      | 32606779  | 1.90 | 1.16  | 3.28    | 0.01497 | 0.09 | 0.10 | SNP        |
| chr6_32612279_T_C      | 32612279  | 0.65 | 0.46  | 0.92    | 0.01504 | 0.39 | 0.36 | SNP        |
| chr6_32803408_T_A      | 32803408  | 3.78 | 1.44  | 13.03   | 0.01522 | 0.03 | 0.04 | SNP        |
| chr6_33045500_T_C      | 33045500  | 0.43 | 0.22  | 0.85    | 0.01526 | 0.03 | 0.02 | SNP        |
| chr6_32341318_A_G      | 32341318  | 0.64 | 0.45  | 0.92    | 0.01527 | 0.34 | 0.31 | SNP        |
| chr6_32340654_G_A      | 32340654  | 0.64 | 0.45  | 0.92    | 0.01531 | 0.34 |      |            |



|                        |          |      |      |      |         |      |      |      |            |
|------------------------|----------|------|------|------|---------|------|------|------|------------|
| chr6_32609520_C_A      | 32609520 | 1.90 | 1.15 | 3.30 | 0.01643 | 0.09 | 0.10 | 0.05 | SNP        |
| chr6_31321776_T_C      | 31321776 | 3.03 | 1.31 | 8.26 | 0.01646 | 0.03 | 0.04 | 0.02 | SNP        |
| chr6_33144243_T_A      | 33144243 | 0.72 | 0.65 | 0.94 | 0.01707 | 0.26 | 0.24 | 0.31 | SNP        |
| chr6_32188297_G_C      | 32188297 | 1.45 | 1.07 | 1.98 | 0.01711 | 0.33 | 0.35 | 0.29 | SNP        |
| chr6_31544189_A_G      | 31544189 | 2.41 | 1.21 | 5.23 | 0.01722 | 0.05 | 0.06 | 0.03 | SNP        |
| chr6_32942302_A_G      | 32942302 | 1.40 | 1.06 | 1.85 | 0.01737 | 0.39 | 0.41 | 0.35 | SNP        |
| chr6_32610105_A_G      | 32610105 | 1.88 | 1.14 | 3.25 | 0.01738 | 0.09 | 0.10 | 0.05 | SNP        |
| chr6_33047173_T_C      | 33047173 | 0.39 | 0.17 | 0.84 | 0.01758 | 0.03 | 0.02 | 0.04 | SNP        |
| chr6_33048354_A_T      | 33048354 | 0.39 | 0.17 | 0.84 | 0.01758 | 0.03 | 0.02 | 0.04 | SNP        |
| chr6_33049865_G_A      | 33049865 | 0.39 | 0.17 | 0.84 | 0.01758 | 0.02 | 0.02 | 0.04 | SNP        |
| chr6_32608790_C_T      | 32608790 | 2.62 | 1.27 | 6.39 | 0.01770 | 0.04 | 0.05 | 0.02 | SNP        |
| chr6_31378864_A_G      | 31378864 | 3.00 | 1.29 | 8.21 | 0.01771 | 0.03 | 0.04 | 0.02 | SNP        |
| chr6_32611260_A_G      | 32611260 | 0.65 | 0.45 | 0.93 | 0.01785 | 0.38 | 0.36 | 0.42 | SNP        |
| chr6_31323233_A_G      | 31323233 | 1.45 | 1.07 | 1.99 | 0.01788 | 0.40 | 0.42 | 0.35 | SNP        |
| chr6_32341473_T_C      | 32341473 | 0.65 | 0.46 | 0.93 | 0.01824 | 0.34 | 0.32 | 0.37 | SNP        |
| chr6_32363844_C_T      | 32363844 | 0.65 | 0.46 | 0.93 | 0.01824 | 0.34 | 0.32 | 0.37 | SNP        |
| chr6_32375352_A_C      | 32375352 | 0.65 | 0.46 | 0.93 | 0.01880 | 0.35 | 0.33 | 0.38 | SNP        |
| chr6_32375371_A_T      | 32375371 | 0.65 | 0.46 | 0.93 | 0.01880 | 0.35 | 0.33 | 0.38 | SNP        |
| chr6_32375374_G_A      | 32375374 | 0.65 | 0.46 | 0.93 | 0.01880 | 0.35 | 0.33 | 0.38 | SNP        |
| chr6_32375424_G_A      | 32375424 | 0.65 | 0.46 | 0.93 | 0.01880 | 0.35 | 0.33 | 0.38 | SNP        |
| chr6_32501245_A_G      | 32501245 | 1.55 | 1.09 | 2.28 | 0.01894 | 0.14 | 0.16 | 0.10 | SNP        |
| chr6_33095647_G_C      | 33095647 | 0.64 | 0.44 | 0.93 | 0.01911 | 0.14 | 0.11 | 0.17 | SNP        |
| chr6_329689254_G_C     | 29689254 | 0.43 | 0.21 | 0.87 | 0.01940 | 0.03 | 0.02 | 0.05 | SNP        |
| chr6_32509597_G_C      | 32509597 | 0.52 | 0.30 | 0.92 | 0.01949 | 0.15 | 0.10 | 0.15 | SNP        |
| chr6_32609456_C_T      | 32609456 | 0.66 | 0.46 | 0.93 | 0.01949 | 0.39 | 0.36 | 0.43 | SNP        |
| chr6_32604642_A_G      | 32604642 | 0.63 | 0.42 | 0.93 | 0.01954 | 0.37 | 0.35 | 0.40 | SNP        |
| chr6_32806584_G_A      | 32806584 | 1.49 | 1.07 | 2.10 | 0.01962 | 0.50 | 0.47 | 0.55 | SNP        |
| chr6_32376746_C_T      | 32376746 | 0.66 | 0.46 | 0.93 | 0.01994 | 0.34 | 0.32 | 0.37 | SNP        |
| chr6_30865204_A_C      | 30865204 | 1.72 | 1.10 | 2.75 | 0.01999 | 0.12 | 0.14 | 0.08 | SNP        |
| chr6_32341719_C_T      | 32341719 | 0.66 | 0.46 | 0.93 | 0.02009 | 0.34 | 0.31 | 0.37 | SNP        |
| chr6_32314262_C_A      | 32314262 | 0.58 | 0.36 | 0.92 | 0.02016 | 0.07 | 0.06 | 0.10 | SNP        |
| chr6_29945270_A_G      | 29945270 | 0.58 | 0.37 | 0.92 | 0.02060 | 0.08 | 0.07 | 0.11 | SNP        |
| chr6_32363816_T_C      | 32363816 | 0.69 | 0.50 | 0.94 | 0.02089 | 0.45 | 0.43 | 0.49 | SNP        |
| chr6_32375695_G_A      | 32375695 | 0.65 | 0.45 | 0.94 | 0.02089 | 0.34 | 0.32 | 0.38 | SNP        |
| chr6_32405671_C_A      | 32405671 | 1.47 | 1.07 | 2.06 | 0.02093 | 0.32 | 0.34 | 0.30 | SNP        |
| chr6_32610994_C_A      | 32610994 | 0.65 | 0.45 | 0.94 | 0.02124 | 0.35 | 0.32 | 0.39 | SNP        |
| chr6_32610997_C_A      | 32610997 | 0.65 | 0.45 | 0.94 | 0.02124 | 0.35 | 0.32 | 0.39 | SNP        |
| chr6_32374032_A_T      | 32374032 | 0.66 | 0.46 | 0.94 | 0.02125 | 0.34 | 0.32 | 0.37 | SNP        |
| chr6_33547430_G_A      | 33547430 | 1.57 | 1.08 | 2.33 | 0.02127 | 0.19 | 0.21 | 0.15 | SNP        |
| chr6_32409530_A_G      | 32409530 | 1.42 | 1.06 | 1.91 | 0.02129 | 0.41 | 0.42 | 0.38 | SNP        |
| chr6_32608537_A_C      | 32608537 | 0.66 | 0.47 | 0.94 | 0.02147 | 0.39 | 0.37 | 0.43 | SNP        |
| chr6_32375973_C_A      | 32375973 | 0.64 | 0.43 | 0.93 | 0.02151 | 0.31 | 0.29 | 0.34 | SNP        |
| chr6_32610008_C_T      | 32610008 | 0.66 | 0.47 | 0.94 | 0.02172 | 0.39 | 0.37 | 0.43 | SNP        |
| chr6_32178773_T_C      | 32178773 | 1.44 | 1.06 | 2.25 | 0.02177 | 0.49 | 0.52 | 0.43 | SNP        |
| chr6_32641897_G_C      | 32641897 | 1.85 | 1.11 | 3.49 | 0.02177 | 0.10 | 0.12 | 0.07 | SNP        |
| chr6_32943345_T_C      | 32943345 | 1.36 | 1.05 | 1.77 | 0.02231 | 0.44 | 0.46 | 0.40 | SNP        |
| chr6_32612410_T_C      | 32612410 | 1.60 | 1.07 | 2.41 | 0.02262 | 0.36 | 0.37 | 0.33 | SNP        |
| chr6_32169621_T_A      | 32169621 | 1.40 | 1.05 | 1.88 | 0.02286 | 0.49 | 0.52 | 0.43 | SNP        |
| chr6_33050178_C_T      | 33050178 | 0.40 | 0.18 | 0.88 | 0.02294 | 0.03 | 0.02 | 0.04 | SNP        |
| chr6_31367874_T_C      | 31367874 | 2.88 | 1.24 | 7.91 | 0.02295 | 0.04 | 0.05 | 0.02 | SNP        |
| xHLA_2field_B_57_D1    | 31321652 | 3.14 | 1.27 | 9.50 | 0.02318 | 0.03 | 0.04 | 0.01 | HLA (xHLA) |
| chr6_32170433_C_T      | 32170433 | 1.41 | 1.05 | 1.89 | 0.02320 | 0.49 | 0.52 | 0.43 | SNP        |
| chr6_31243859_C_T      | 31243859 | 0.62 | 0.42 | 0.94 | 0.02325 | 0.22 | 0.22 | 0.23 | SNP        |
| chr6_32409781_C_T      | 32409781 | 0.67 | 0.47 | 0.94 | 0.02329 | 0.45 | 0.42 | 0.49 | SNP        |
| xHLA_2field_C_06_02    | 31236526 | 1.98 | 1.13 | 3.70 | 0.02332 | 0.07 | 0.08 | 0.04 | HLA (xHLA) |
| chr6_32612241_A_T      | 32612241 | 0.66 | 0.47 | 0.95 | 0.02348 | 0.39 | 0.36 | 0.43 | SNP        |
| chr6_32559216_G_A      | 32559216 | 1.47 | 1.06 | 2.07 | 0.02351 | 0.37 | 0.38 | 0.34 | SNP        |
| chr6_32608403_T_C      | 32608403 | 0.67 | 0.47 | 0.95 | 0.02361 | 0.39 | 0.37 | 0.43 | SNP        |
| chr6_32611971_G_C      | 32611971 | 0.66 | 0.46 | 0.94 | 0.02361 | 0.38 | 0.35 | 0.41 | SNP        |
| chr6_32406704_G_C      | 32406704 | 1.64 | 1.08 | 2.55 | 0.02363 | 0.22 | 0.23 | 0.21 | SNP        |
| chr6_32611958_G_C      | 32611958 | 0.65 | 0.45 | 0.94 | 0.02367 | 0.37 | 0.34 | 0.41 | SNP        |
| chr6_32440879_T_C      | 32440879 | 1.55 | 1.06 | 2.27 | 0.02369 | 0.34 | 0.35 | 0.33 | SNP        |
| chr6_32014456_C_T      | 32014456 | 2.10 | 1.14 | 4.20 | 0.02375 | 0.06 | 0.07 | 0.03 | SNP        |
| chr6_32085278_C_T      | 32085278 | 3.11 | 1.26 | 9.40 | 0.02381 | 0.03 | 0.04 | 0.02 | SNP        |
| chr6_32191339_C_T      | 32191339 | 0.62 | 0.43 | 0.94 | 0.02382 | 0.05 | 0.07 | 0.03 | SNP        |
| chr6_32610934_A_G      | 32610934 | 0.65 | 0.44 | 0.94 | 0.02391 | 0.38 | 0.36 | 0.42 | SNP        |
| chr6_32809223_C_A      | 32809223 | 1.40 | 1.05 | 1.88 | 0.02396 | 0.45 | 0.48 | 0.40 | SNP        |
| chr6_32363955_T_C      | 32363955 | 0.70 | 0.51 | 0.95 | 0.02399 | 0.45 | 0.43 | 0.49 | SNP        |
| chr6_32628189_A_G      | 32628189 | 0.65 | 0.45 | 0.94 | 0.02402 | 0.27 | 0.26 | 0.31 | SNP        |
| chr6_32171683_T_C      | 32171683 | 1.40 | 1.05 | 1.89 | 0.02428 | 0.48 | 0.51 | 0.43 | SNP        |
| chr6_32612251_T_G      | 32612251 | 0.67 | 0.47 | 0.95 | 0.02432 | 0.39 | 0.36 | 0.42 | SNP        |
| chr6_32611964_C_T      | 32611964 | 0.66 | 0.46 | 0.95 | 0.02450 | 0.38 | 0.35 | 0.41 | SNP        |
| chr6_33590061_C_G      | 33590061 | 1.92 | 1.11 | 3.49 | 0.02453 | 0.07 | 0.08 | 0.05 | SNP        |
| chr6_32411833_C_T      | 32411833 | 0.68 | 0.48 | 0.95 | 0.02459 | 0.46 | 0.43 | 0.49 | SNP        |
| chr6_31248995_C_T      | 31248995 | 0.45 | 0.22 | 0.90 | 0.02461 | 0.04 | 0.03 | 0.06 | SNP        |
| chr6_31236467_G_C      | 31236467 | 1.39 | 1.04 | 1.85 | 0.02465 | 0.34 | 0.37 | 0.30 | SNP        |
| chr6_32603177_A_G      | 32603177 | 1.58 | 1.07 | 2.38 | 0.02471 | 0.17 | 0.19 | 0.14 | SNP        |
| chr6_32781076_C_A      | 32781076 | 1.99 | 1.13 | 3.79 | 0.02472 | 0.06 | 0.07 | 0.04 | SNP        |
| chr6_32376176_G_C      | 32376176 | 0.66 | 0.46 | 0.95 | 0.02475 | 0.35 | 0.32 | 0.38 | SNP        |
| chr6_32376348_G_A      | 32376348 | 0.65 | 0.44 | 0.94 | 0.02491 | 0.31 | 0.29 | 0.34 | SNP        |
| chr6_33377506_G_C      | 33377506 | 0.46 | 0.24 | 0.91 | 0.02493 | 0.04 | 0.03 | 0.05 | SNP        |
| chr6_32409787_T_C      | 32409787 | 0.67 | 0.47 | 0.95 | 0.02496 | 0.45 | 0.42 | 0.48 | SNP        |
| chr6_32520460_C_T      | 32520460 | 0.67 | 0.48 | 0.95 | 0.02496 | 0.41 | 0.39 | 0.45 | SNP        |
| chr6_32606942_G_A      | 32606942 | 0.67 | 0.47 | 0.95 | 0.02497 | 0.40 | 0.37 | 0.43 | SNP        |
| chr6_32441150_C_T      | 32441150 | 0.67 | 0.48 | 0.95 | 0.02512 | 0.40 | 0.37 | 0.43 | SNP        |
| chr6_32605646_T_G      | 32605646 | 0.67 | 0.47 | 0.95 | 0.02513 | 0.40 | 0.37 | 0.43 | SNP        |
| chr6_31473730_G_A      | 31473730 | 3.03 | 1.25 | 9.08 | 0.02517 | 0.03 | 0.04 | 0.01 | SNP        |
| chr6_32188383_T_C      | 32188383 | 1.42 | 1.05 | 1.95 | 0.02519 | 0.45 | 0.48 | 0.40 | SNP        |
| chr6_32608856_T_C      | 32608856 | 0.67 | 0.47 | 0.95 | 0.02570 | 0.37 | 0.35 | 0.41 | SNP        |
| chr6_33048975_G_A      | 33048975 | 0.40 | 0.17 | 0.89 | 0.02586 | 0.02 | 0.02 | 0.04 | SNP        |
| chr6_29716169_G_T      | 29716169 | 0.40 | 0.17 | 0.89 | 0.02592 | 0.03 | 0.02 | 0.05 | SNP        |
| chr6_32611243_C_T      | 32611243 | 0.66 | 0.46 | 0.95 | 0.02608 | 0.38 | 0.36 | 0.42 | SNP        |
| chr6_32605501_C_G      | 32605501 | 0.67 | 0.48 | 0.95 | 0.02615 | 0.43 | 0.41 | 0.47 | SNP        |
| chr6_32375280_C_G      | 32375280 | 0.67 | 0.47 | 0.95 | 0.02641 | 0.35 | 0.32 | 0.38 | SNP        |
| chr6_31430951_C_T      | 31430951 | 0.54 | 0.31 | 0.93 | 0.02645 | 0.07 | 0.06 | 0.09 | SNP        |
| chr6_32550819_C_A      | 32550819 | 0.67 | 0.47 | 0.95 | 0.02647 | 0.38 | 0.36 | 0.42 | SNP        |
| chr6_32192331_C_A      | 32192331 | 0.71 | 0.53 | 0.96 | 0.02753 | 0.48 | 0.51 | 0.42 | SNP        |
| chr6_32610403_C_A      | 32610403 | 0.67 | 0.47 | 0.96 | 0.02754 | 0.39 | 0.36 | 0.42 | SNP        |
| chr6_32943151_C_T      | 32943151 | 1.35 | 1.04 | 1.77 | 0.02758 | 0.39 | 0.41 | 0.36 | SNP        |
| chr6_31324750_G_A      | 31324750 | 0.56 | 0.33 | 0.94 | 0.02772 | 0.08 | 0.07 | 0.12 | SNP        |
| chr6_32806576_C_T      | 32806576 | 1.45 | 1.04 | 2.02 | 0.02798 | 0.47 | 0.49 | 0.42 | SNP        |
| chr6_32604259_C_T      | 32604259 | 0.67 | 0.47 | 0.96 | 0.02802 | 0.39 | 0.37 | 0.43 | SNP        |
| chr6_31320687_C_A      | 31320687 | 0.57 | 0.34 | 0.94 | 0.02826 | 0.07 | 0.06 | 0.10 | SNP        |
| chr6_32375330_G_A      | 32375330 | 0.67 | 0.47 | 0.96 | 0.02856 | 0.35 | 0.33 | 0.38 | SNP        |
| chr6_32612008_T_C      | 32612008 | 0.67 | 0.47 | 0.96 | 0.02856 | 0.37 | 0.35 | 0.41 | SNP        |
| chr6_32605336_G_A      | 32605336 | 0.68 | 0.48 | 0.96 | 0.02896 | 0.40 | 0.37 | 0.43 | SNP        |
| chr6_30876996_G_C      | 30876996 | 1.54 | 1.05 | 2.29 | 0.02933 | 0.15 | 0.16 | 0.11 | SNP        |
| xHLA_2field_DPB1_01_01 | 33043767 | 0.41 | 0.18 | 0.91 | 0.02940 | 0.02 | 0.02 | 0.04 | HLA (xHLA) |
| chr6_32945097_C_T      | 32945097 | 0.42 | 0.19 | 0.92 | 0.02969 | 0.03 | 0.02 | 0.04 | SNP        |
| chr6_33384473_C_T      | 33384473 | 1.73 | 1.07 | 2.89 | 0.02977 | 0.10 | 0.11 | 0.07 | SNP        |
| chr6_30849822_G_A      | 30849822 | 1.58 | 1.06 | 2.41 | 0.02985 | 0.12 | 0.14 | 0.09 | SNP        |
| chr6_32821447_C_T      | 32821447 | 1.65 | 1.06 | 2.64 | 0.03016 | 0.17 | 0.19 |      |            |



|                   |          |      |      |      |         |      |      |      |     |
|-------------------|----------|------|------|------|---------|------|------|------|-----|
| chr6_31235869_T_C | 31235869 | 1.62 | 1.05 | 2.57 | 0.0325  | 0.23 | 0.26 | 0.19 | SNP |
| chr6_32551638_C_T | 32551638 | 2.01 | 1.09 | 3.98 | 0.0334  | 0.06 | 0.07 | 0.04 | SNP |
| chr6_31240041_T_C | 31240041 | 0.67 | 0.47 | 0.97 | 0.03347 | 0.42 | 0.41 | 0.45 | SNP |
| chr6_31977391_T_C | 31977391 | 1.70 | 1.05 | 2.82 | 0.03345 | 0.23 | 0.25 | 0.21 | SNP |
| chr6_30864927_C_T | 30864927 | 2.03 | 1.09 | 4.07 | 0.03358 | 0.05 | 0.06 | 0.03 | SNP |
| chr6_32606732_G_A | 32606732 | 0.69 | 0.49 | 0.97 | 0.03391 | 0.40 | 0.38 | 0.43 | SNP |
| chr6_32606052_T_G | 32606052 | 0.69 | 0.48 | 0.97 | 0.03418 | 0.40 | 0.38 | 0.44 | SNP |
| chr6_32605724_A_G | 32605724 | 0.69 | 0.49 | 0.97 | 0.03434 | 0.39 | 0.37 | 0.42 | SNP |
| chr6_31241370_T_C | 31241370 | 1.42 | 1.03 | 1.98 | 0.03440 | 0.36 | 0.37 | 0.34 | SNP |
| chr6_31543101_G_A | 31543101 | 2.38 | 1.12 | 5.71 | 0.03455 | 0.04 | 0.05 | 0.02 | SNP |
| chr6_32611234_C_T | 32611234 | 0.68 | 0.47 | 0.97 | 0.03484 | 0.38 | 0.36 | 0.41 | SNP |
| chr6_32184066_G_T | 32184066 | 1.38 | 1.02 | 1.86 | 0.03496 | 0.45 | 0.48 | 0.40 | SNP |
| chr6_33137570_C_T | 33137570 | 0.43 | 0.19 | 0.94 | 0.03502 | 0.02 | 0.02 | 0.04 | SNP |
| chr6_33158898_C_T | 33158898 | 0.43 | 0.19 | 0.94 | 0.03502 | 0.02 | 0.02 | 0.04 | SNP |
| chr6_32805049_T_C | 32805049 | 1.37 | 1.02 | 1.84 | 0.03547 | 0.47 | 0.49 | 0.42 | SNP |
| chr6_33138021_G_A | 33138021 | 0.43 | 0.19 | 0.95 | 0.03558 | 0.02 | 0.02 | 0.04 | SNP |
| chr6_32551541_C_T | 32551541 | 1.64 | 1.04 | 2.61 | 0.03563 | 0.21 | 0.22 | 0.20 | SNP |
| chr6_32166380_C_G | 32166380 | 2.24 | 1.10 | 5.05 | 0.03567 | 0.04 | 0.05 | 0.02 | SNP |
| chr6_32171279_C_T | 32171279 | 2.24 | 1.10 | 5.05 | 0.03567 | 0.04 | 0.05 | 0.02 | SNP |
| chr6_32171288_C_T | 32171288 | 2.24 | 1.10 | 5.05 | 0.03567 | 0.04 | 0.05 | 0.02 | SNP |
| chr6_32802807_C_T | 32802807 | 0.65 | 0.43 | 0.97 | 0.03581 | 0.11 | 0.10 | 0.14 | SNP |
| chr6_32633811_C_T | 32633811 | 2.05 | 1.09 | 4.21 | 0.03586 | 0.05 | 0.06 | 0.03 | SNP |
| chr6_32604108_T_C | 32604108 | 0.69 | 0.49 | 0.98 | 0.03604 | 0.40 | 0.37 | 0.43 | SNP |
| chr6_30863642_C_G | 30863642 | 1.60 | 1.04 | 2.60 | 0.03607 | 0.14 | 0.16 | 0.16 | SNP |
| chr6_31239449_C_G | 31239449 | 0.53 | 0.30 | 0.96 | 0.03611 | 0.17 | 0.17 | 0.19 | SNP |
| chr6_32558183_G_T | 32558183 | 0.71 | 0.51 | 0.98 | 0.03641 | 0.45 | 0.48 | 0.39 | SNP |
| chr6_29910947_T_A | 29910947 | 0.58 | 0.35 | 0.97 | 0.03643 | 0.08 | 0.07 | 0.10 | SNP |
| chr6_31243884_G_A | 31243884 | 0.65 | 0.44 | 0.98 | 0.03658 | 0.22 | 0.22 | 0.23 | SNP |
| chr6_32945466_A_G | 32945466 | 0.50 | 0.26 | 0.96 | 0.03690 | 0.08 | 0.07 | 0.08 | SNP |
| chr6_32610968_A_G | 32610968 | 0.68 | 0.47 | 0.98 | 0.03698 | 0.35 | 0.33 | 0.39 | SNP |
| chr6_32163274_G_A | 32163274 | 2.23 | 1.10 | 5.02 | 0.03713 | 0.04 | 0.05 | 0.02 | SNP |
| chr6_32559212_A_G | 32559212 | 0.69 | 0.48 | 0.98 | 0.03743 | 0.38 | 0.36 | 0.42 | SNP |
| chr6_31322996_C_T | 31322996 | 1.37 | 1.02 | 1.85 | 0.03751 | 0.38 | 0.40 | 0.34 | SNP |
| chr6_30889389_T_C | 30889389 | 1.56 | 1.04 | 2.39 | 0.03760 | 0.13 | 0.15 | 0.10 | SNP |
| chr6_32611216_A_G | 32611216 | 1.58 | 1.04 | 2.46 | 0.03761 | 0.11 | 0.13 | 0.08 | SNP |
| chr6_30859355_G_A | 30859355 | 1.55 | 1.04 | 2.37 | 0.03766 | 0.13 | 0.14 | 0.09 | SNP |
| chr6_30887972_C_T | 30887972 | 1.52 | 1.03 | 2.28 | 0.03773 | 0.14 | 0.15 | 0.11 | SNP |
| chr6_32635248_A_T | 32635248 | 0.69 | 0.49 | 0.98 | 0.03784 | 0.31 | 0.29 | 0.35 | SNP |
| chr6_31894626_A_G | 31894626 | 0.71 | 0.51 | 0.98 | 0.03798 | 0.42 | 0.41 | 0.46 | SNP |
| chr6_30877202_T_C | 30877202 | 1.51 | 1.03 | 2.26 | 0.03815 | 0.15 | 0.16 | 0.11 | SNP |
| chr6_31321919_G_T | 31321919 | 2.14 | 1.08 | 4.63 | 0.03832 | 0.05 | 0.06 | 0.03 | SNP |
| chr6_32604538_G_A | 32604538 | 0.68 | 0.47 | 0.98 | 0.03858 | 0.43 | 0.41 | 0.46 | SNP |
| chr6_32405821_T_C | 32405821 | 0.67 | 0.46 | 0.98 | 0.03874 | 0.31 | 0.29 | 0.34 | SNP |
| chr6_32191581_T_A | 32191581 | 1.49 | 1.03 | 2.19 | 0.03880 | 0.14 | 0.15 | 0.14 | SNP |
| chr6_31248114_C_T | 31248114 | 0.48 | 0.23 | 0.97 | 0.03914 | 0.03 | 0.02 | 0.05 | SNP |
| chr6_31127562_C_T | 31127562 | 1.67 | 1.04 | 2.75 | 0.03917 | 0.21 | 0.23 | 0.16 | SNP |
| chr6_32191730_G_A | 32191730 | 1.41 | 1.02 | 1.98 | 0.03927 | 0.25 | 0.27 | 0.22 | SNP |
| chr6_32804570_G_A | 32804570 | 1.39 | 1.02 | 1.91 | 0.03990 | 0.44 | 0.46 | 0.40 | SNP |
| chr6_32612041_A_G | 32612041 | 0.69 | 0.48 | 0.98 | 0.04007 | 0.38 | 0.36 | 0.42 | SNP |
| chr6_32611760_G_T | 32611760 | 0.69 | 0.48 | 0.98 | 0.04016 | 0.38 | 0.36 | 0.42 | SNP |
| chr6_32193270_A_G | 32193270 | 1.38 | 1.02 | 1.88 | 0.04022 | 0.28 | 0.30 | 0.25 | SNP |
| chr6_32193698_A_T | 32193698 | 1.38 | 1.02 | 1.88 | 0.04022 | 0.28 | 0.30 | 0.25 | SNP |
| chr6_32604059_A_G | 32604059 | 0.69 | 0.49 | 0.98 | 0.04033 | 0.39 | 0.37 | 0.43 | SNP |
| chr6_32781121_G_C | 32781121 | 1.86 | 1.06 | 3.47 | 0.04040 | 0.06 | 0.07 | 0.04 | SNP |
| chr6_31430060_G_T | 31430060 | 2.46 | 1.10 | 6.28 | 0.04047 | 0.03 | 0.04 | 0.02 | SNP |
| chr6_32605101_A_G | 32605101 | 0.69 | 0.49 | 0.98 | 0.04049 | 0.40 | 0.37 | 0.43 | SNP |
| chr6_32973281_C_T | 32973281 | 1.31 | 1.01 | 1.70 | 0.04050 | 0.49 | 0.51 | 0.45 | SNP |
| chr6_32604657_G_A | 32604657 | 0.69 | 0.49 | 0.98 | 0.04058 | 0.39 | 0.37 | 0.43 | SNP |
| chr6_31379752_C_T | 31379752 | 0.58 | 0.34 | 0.98 | 0.04076 | 0.06 | 0.06 | 0.08 | SNP |
| chr6_32609358_C_T | 32609358 | 0.69 | 0.48 | 0.98 | 0.04106 | 0.37 | 0.35 | 0.40 | SNP |
| chr6_32303672_T_A | 32303672 | 1.82 | 1.05 | 3.35 | 0.04119 | 0.06 | 0.07 | 0.04 | SNP |
| chr6_32633971_A_G | 32633971 | 0.70 | 0.49 | 0.99 | 0.04129 | 0.27 | 0.25 | 0.31 | SNP |
| chr6_32409305_T_C | 32409305 | 0.71 | 0.50 | 0.99 | 0.04148 | 0.45 | 0.43 | 0.49 | SNP |
| chr6_32411523_T_C | 32411523 | 0.71 | 0.50 | 0.99 | 0.04148 | 0.45 | 0.43 | 0.49 | SNP |
| chr6_32983139_G_A | 32983139 | 0.68 | 0.47 | 0.99 | 0.04151 | 0.23 | 0.22 | 0.24 | SNP |
| chr6_32338283_G_T | 32338283 | 1.50 | 1.02 | 2.24 | 0.04153 | 0.26 | 0.29 | 0.21 | SNP |
| chr6_31325090_T_C | 31325090 | 1.54 | 1.02 | 2.34 | 0.04155 | 0.40 | 0.41 | 0.37 | SNP |
| chr6_32612104_C_T | 32612104 | 0.69 | 0.48 | 0.99 | 0.04167 | 0.39 | 0.37 | 0.42 | SNP |
| chr6_32612111_G_A | 32612111 | 0.69 | 0.48 | 0.99 | 0.04167 | 0.39 | 0.37 | 0.42 | SNP |
| chr6_29893919_G_C | 29893919 | 0.56 | 0.32 | 0.98 | 0.04171 | 0.05 | 0.04 | 0.07 | SNP |
| chr6_32606217_G_A | 32606217 | 0.69 | 0.49 | 0.99 | 0.04188 | 0.40 | 0.37 | 0.43 | SNP |
| chr6_32608417_G_A | 32608417 | 0.69 | 0.49 | 0.99 | 0.04232 | 0.39 | 0.37 | 0.42 | SNP |
| chr6_32797466_G_A | 32797466 | 1.74 | 1.03 | 3.01 | 0.04234 | 0.11 | 0.12 | 0.08 | SNP |
| chr6_32610860_G_T | 32610860 | 0.69 | 0.48 | 0.99 | 0.04250 | 0.38 | 0.36 | 0.41 | SNP |
| chr6_32604151_C_T | 32604151 | 0.70 | 0.49 | 0.99 | 0.04292 | 0.39 | 0.37 | 0.43 | SNP |
| chr6_31321364_G_A | 31321364 | 0.60 | 0.36 | 0.99 | 0.04308 | 0.07 | 0.06 | 0.09 | SNP |
| chr6_31125978_A_T | 31125978 | 1.78 | 1.03 | 3.16 | 0.04319 | 0.22 | 0.24 | 0.17 | SNP |
| chr6_31240635_G_C | 31240635 | 0.65 | 0.42 | 0.99 | 0.04326 | 0.12 | 0.11 | 0.14 | SNP |
| chr6_32627367_G_A | 32627367 | 0.50 | 0.25 | 0.99 | 0.04328 | 0.04 | 0.03 | 0.06 | SNP |
| chr6_32407906_T_C | 32407906 | 2.06 | 1.07 | 4.40 | 0.04336 | 0.05 | 0.06 | 0.03 | SNP |
| chr6_29941851_G_T | 29941851 | 0.53 | 0.29 | 0.98 | 0.04342 | 0.04 | 0.03 | 0.06 | SNP |
| chr6_31322367_T_G | 31322367 | 0.61 | 0.38 | 0.99 | 0.04346 | 0.07 | 0.06 | 0.09 | SNP |
| chr6_32793981_C_A | 32793981 | 0.71 | 0.51 | 0.99 | 0.04398 | 0.25 | 0.23 | 0.30 | SNP |
| chr6_32780914_G_A | 32780914 | 1.83 | 1.05 | 3.40 | 0.04402 | 0.06 | 0.07 | 0.04 | SNP |
| chr6_32559708_G_A | 32559708 | 0.69 | 0.48 | 0.99 | 0.04407 | 0.38 | 0.36 | 0.42 | SNP |
| chr6_32635230_G_A | 32635230 | 0.70 | 0.50 | 0.99 | 0.04423 | 0.31 | 0.30 | 0.36 | SNP |
| chr6_31322402_C_T | 31322402 | 0.73 | 0.54 | 0.99 | 0.04437 | 0.34 | 0.33 | 0.35 | SNP |
| chr6_29910473_G_A | 29910473 | 0.60 | 0.36 | 0.99 | 0.04437 | 0.08 | 0.07 | 0.11 | SNP |
| chr6_30867666_T_C | 30867666 | 1.48 | 1.02 | 2.20 | 0.04446 | 0.15 | 0.16 | 0.11 | SNP |
| chr6_32611265_C_T | 32611265 | 0.69 | 0.48 | 0.99 | 0.04448 | 0.38 | 0.36 | 0.41 | SNP |
| chr6_29893960_T_C | 29893960 | 0.68 | 0.47 | 0.99 | 0.04453 | 0.22 | 0.21 | 0.24 | SNP |
| chr6_30857072_G_C | 30857072 | 1.52 | 1.02 | 2.32 | 0.04454 | 0.14 | 0.16 | 0.11 | SNP |
| chr6_30852747_C_T | 30852747 | 1.51 | 1.02 | 2.28 | 0.04457 | 0.14 | 0.16 | 0.11 | SNP |
| chr6_29759222_G_A | 29759222 | 0.46 | 0.21 | 0.98 | 0.04486 | 0.02 | 0.02 | 0.04 | SNP |
| chr6_32184094_G_A | 32184094 | 1.35 | 1.01 | 1.82 | 0.04514 | 0.46 | 0.49 | 0.41 | SNP |
| chr6_32605418_G_A | 32605418 | 0.70 | 0.49 | 0.99 | 0.04521 | 0.39 | 0.37 | 0.43 | SNP |
| chr6_32782387_G_A | 32782387 | 0.72 | 0.52 | 0.99 | 0.04523 | 0.23 | 0.22 | 0.26 | SNP |
| chr6_32803999_A_T | 32803999 | 0.46 | 0.21 | 0.98 | 0.04560 | 0.02 | 0.02 | 0.04 | SNP |
| chr6_33257162_C_T | 33257162 | 1.51 | 1.02 | 2.30 | 0.04570 | 0.14 | 0.16 | 0.12 | SNP |
| chr6_33382288_A_G | 33382288 | 1.58 | 1.02 | 2.50 | 0.04592 | 0.11 | 0.12 | 0.08 | SNP |
| chr6_32798647_A_T | 32798647 | 0.46 | 0.21 | 0.98 | 0.04642 | 0.02 | 0.02 | 0.04 | SNP |
| chr6_31322855_C_T | 31322855 | 0.61 | 0.38 | 1.00 | 0.04663 | 0.07 | 0.06 | 0.09 | SNP |
| chr6_29911069_A_T | 29911069 | 0.61 | 0.37 | 1.00 | 0.04670 | 0.08 | 0.07 | 0.10 | SNP |
| chr6_32370616_T_C | 32370616 | 0.69 | 0.48 | 0.99 | 0.04685 | 0.34 | 0.32 | 0.37 | SNP |
| chr6_30865115_G_A | 30865115 | 1.67 | 1.02 | 2.82 | 0.04706 | 0.14 | 0.16 | 0.10 | SNP |
| chr6_32604564_C_T | 32604564 | 0.69 | 0.48 | 0.99 | 0.04726 | 0.43 | 0.41 | 0.46 | SNP |
| chr6_32187605_G_A | 32187605 | 0.72 | 0.52 | 1.00 | 0.04736 | 0.45 | 0.43 | 0.51 | SNP |
| chr6_33160906_G_T | 33160906 | 0.39 | 0.15 | 0.99 | 0.04758 | 0.02 | 0.01 | 0.03 | SNP |
| chr6_32184221_G_A | 32184221 | 1.35 | 1.00 | 1.81 | 0.04782 | 0.46 | 0.49 | 0.41 | SNP |
| chr6_31930462_G_A | 31930462 | 1.60 | 1.02 | 2.59 | 0.04803 | 0.10 | 0.11 | 0.08 | SNP |
| chr6_33132931_T_C | 33132931 | 1.35 | 1.00 | 1.81 | 0.04804 | 0.48 | 0.50 | 0.43 | SNP |
| chr6_32297209_G_A | 32297209 | 1.83 | 1.03 | 3.46 | 0.04811 | 0.06 | 0.07 | 0.04 | SNP |

**Supplementary Table 8.** Association analysis of renal involvement in all AAV patients versus controls, adjusting for sex and genetic structure (principal components 1-4).

| Variant                | position | OR   | CI_lower | CI_upper | p        | MAF  | MAF_cases | MAF_controls | Type (SNP, HLA (xHLA)) |
|------------------------|----------|------|----------|----------|----------|------|-----------|--------------|------------------------|
| xHLA_2field_DRB1_04_04 | 32546552 | 4.31 | 2.37     | 8.56     | 6.96E-06 | 0.09 | 0.12      | 0.04         | HLA (xHLA)             |
| chr6_31324531_C        | 31324531 | 0.44 | 0.29     | 0.66     | 7.64E-05 | 0.33 | 0.30      | 0.38         | SNP                    |
| chr6_29892107_C        | 29892107 | 2.08 | 1.41     | 3.13     | 0.00030  | 0.23 | 0.25      | 0.18         | SNP                    |
| chr6_31244961_G        | 31244961 | 4.29 | 2.03     | 10.34    | 0.00040  | 0.06 | 0.08      | 0.03         | SNP                    |
| chr6_31235775_C        | 31235775 | 3.00 | 1.64     | 5.88     | 0.00070  | 0.08 | 0.09      | 0.04         | SNP                    |
| chr6_32796310_A        | 32796310 | 6.08 | 2.38     | 20.68    | 0.00080  | 0.04 | 0.05      | 0.01         | SNP                    |
| chr6_31113052_G        | 31113052 | 0.54 | 0.38     | 0.78     | 0.00086  | 0.31 | 0.29      | 0.34         | SNP                    |
| chr6_32376517_C        | 32376517 | 2.45 | 1.47     | 4.27     | 0.00088  | 0.09 | 0.11      | 0.06         | SNP                    |
| chr6_31320687_C        | 31320687 | 2.90 | 1.59     | 5.68     | 0.00096  | 0.07 | 0.09      | 0.04         | SNP                    |
| chr6_32369488_G        | 32369488 | 2.36 | 1.43     | 4.06     | 0.00122  | 0.10 | 0.11      | 0.06         | SNP                    |
| chr6_29893922_A        | 29893922 | 2.00 | 1.33     | 3.10     | 0.00123  | 0.22 | 0.24      | 0.19         | SNP                    |
| chr6_31247108_G        | 31247108 | 3.36 | 1.68     | 7.42     | 0.00127  | 0.07 | 0.08      | 0.03         | SNP                    |
| chr6_33032851_C        | 33032851 | 2.68 | 1.51     | 5.09     | 0.00134  | 0.08 | 0.09      | 0.04         | SNP                    |
| chr6_33037199_G        | 33037199 | 2.68 | 1.51     | 5.09     | 0.00134  | 0.08 | 0.09      | 0.04         | SNP                    |
| chr6_33033274_C        | 33033274 | 2.66 | 1.50     | 5.05     | 0.00148  | 0.08 | 0.09      | 0.04         | SNP                    |
| chr6_29892137_G        | 29892137 | 1.84 | 1.27     | 2.71     | 0.00151  | 0.26 | 0.28      | 0.22         | SNP                    |
| chr6_29896105_G        | 29896105 | 1.87 | 1.28     | 2.78     | 0.00153  | 0.24 | 0.26      | 0.20         | SNP                    |
| chr6_31246015_C        | 31246015 | 2.98 | 1.56     | 6.08     | 0.00164  | 0.07 | 0.08      | 0.03         | SNP                    |
| chr6_31246542_G        | 31246542 | 2.96 | 1.56     | 6.09     | 0.00170  | 0.07 | 0.08      | 0.03         | SNP                    |
| chr6_29893960_T        | 29893960 | 1.95 | 1.30     | 3.00     | 0.00181  | 0.22 | 0.24      | 0.19         | SNP                    |
| chr6_32628195_A        | 32628195 | 3.61 | 1.73     | 8.91     | 0.00185  | 0.05 | 0.07      | 0.02         | SNP                    |
| chr6_31246668_G        | 31246668 | 3.06 | 1.57     | 6.49     | 0.00188  | 0.06 | 0.08      | 0.03         | SNP                    |
| chr6_31238538_G        | 31238538 | 2.82 | 1.56     | 5.66     | 0.00196  | 0.07 | 0.08      | 0.04         | SNP                    |
| chr6_31241032_A        | 31241032 | 2.80 | 1.50     | 5.62     | 0.00210  | 0.07 | 0.08      | 0.04         | SNP                    |
| chr6_31244298_A        | 31244298 | 2.80 | 1.50     | 5.63     | 0.00218  | 0.07 | 0.08      | 0.04         | SNP                    |
| chr6_29892203_C        | 29892203 | 1.81 | 1.25     | 2.67     | 0.00221  | 0.26 | 0.28      | 0.23         | SNP                    |
| chr6_29895701_T        | 29895701 | 1.81 | 1.25     | 2.67     | 0.00232  | 0.23 | 0.25      | 0.19         | SNP                    |
| chr6_33041734_C        | 33041734 | 2.56 | 1.44     | 4.86     | 0.00232  | 0.08 | 0.09      | 0.04         | SNP                    |
| chr6_31245909_G        | 31245909 | 2.84 | 1.47     | 5.56     | 0.00236  | 0.07 | 0.08      | 0.04         | SNP                    |
| chr6_31237779_C        | 31237779 | 2.83 | 1.49     | 5.75     | 0.00238  | 0.07 | 0.08      | 0.04         | SNP                    |
| chr6_31324599_T        | 31324599 | 0.51 | 0.33     | 0.79     | 0.00252  | 0.16 | 0.14      | 0.22         | SNP                    |
| chr6_31246100_A        | 31246100 | 2.75 | 1.47     | 5.52     | 0.00253  | 0.07 | 0.08      | 0.04         | SNP                    |
| chr6_31235998_G        | 31235998 | 0.61 | 0.44     | 0.84     | 0.00256  | 0.22 | 0.20      | 0.27         | SNP                    |
| chr6_31246231_C        | 31246231 | 2.74 | 1.47     | 5.51     | 0.00256  | 0.07 | 0.08      | 0.04         | SNP                    |
| chr6_31241793_G        | 31241793 | 2.76 | 1.47     | 5.57     | 0.00257  | 0.07 | 0.08      | 0.04         | SNP                    |
| chr6_31244151_T        | 31244151 | 2.75 | 1.47     | 5.52     | 0.00257  | 0.07 | 0.08      | 0.04         | SNP                    |
| chr6_31245180_T        | 31245180 | 2.76 | 1.47     | 5.57     | 0.00259  | 0.07 | 0.08      | 0.04         | SNP                    |
| chr6_31245182_G        | 31245182 | 2.76 | 1.47     | 5.57     | 0.00259  | 0.07 | 0.08      | 0.04         | SNP                    |
| chr6_31245476_A        | 31245476 | 2.74 | 1.47     | 5.49     | 0.00266  | 0.07 | 0.08      | 0.04         | SNP                    |
| chr6_31246095_T        | 31246095 | 2.73 | 1.46     | 5.47     | 0.00273  | 0.07 | 0.08      | 0.04         | SNP                    |
| chr6_31246676_C        | 31246676 | 2.83 | 1.48     | 5.85     | 0.00289  | 0.07 | 0.08      | 0.03         | SNP                    |
| chr6_31246119_T        | 31246119 | 2.70 | 1.45     | 5.44     | 0.00303  | 0.07 | 0.08      | 0.04         | SNP                    |
| chr6_31320097_C        | 31320097 | 3.22 | 1.56     | 7.44     | 0.00305  | 0.06 | 0.07      | 0.03         | SNP                    |
| chr6_31246177_G        | 31246177 | 2.70 | 1.44     | 5.43     | 0.00306  | 0.07 | 0.08      | 0.04         | SNP                    |
| chr6_31246652_G        | 31246652 | 2.78 | 1.46     | 5.74     | 0.00319  | 0.06 | 0.08      | 0.03         | SNP                    |
| chr6_31246410_G        | 31246410 | 2.69 | 1.44     | 5.41     | 0.00319  | 0.07 | 0.08      | 0.04         | SNP                    |
| chr6_31245177_G        | 31245177 | 2.71 | 1.44     | 5.47     | 0.00321  | 0.07 | 0.08      | 0.04         | SNP                    |
| chr6_29892217_T        | 29892217 | 1.76 | 1.21     | 2.60     | 0.00368  | 0.26 | 0.28      | 0.23         | SNP                    |
| chr6_29897770_G        | 29897770 | 1.71 | 1.20     | 2.49     | 0.00371  | 0.27 | 0.29      | 0.24         | SNP                    |
| chr6_32629859_G        | 32629859 | 0.57 | 0.38     | 0.83     | 0.00372  | 0.42 | 0.40      | 0.46         | SNP                    |
| chr6_30229267_G        | 30229267 | 2.61 | 1.38     | 5.10     | 0.00381  | 0.12 | 0.12      | 0.10         | SNP                    |
| chr6_30867958_T        | 30867958 | 0.58 | 0.40     | 0.84     | 0.00421  | 0.12 | 0.10      | 0.17         | SNP                    |
| chr6_29892229_T        | 29892229 | 1.76 | 1.20     | 2.61     | 0.00424  | 0.26 | 0.27      | 0.23         | SNP                    |
| chr6_31365547_G        | 31365547 | 2.74 | 1.47     | 5.57     | 0.00429  | 0.10 | 0.12      | 0.07         | SNP                    |
| chr6_31113106_G        | 31113106 | 0.58 | 0.39     | 0.84     | 0.00447  | 0.29 | 0.28      | 0.31         | SNP                    |
| chr6_32786882_T        | 32786882 | 2.31 | 1.33     | 4.27     | 0.00455  | 0.08 | 0.09      | 0.04         | SNP                    |
| chr6_33039625_T        | 33039625 | 1.85 | 1.23     | 2.89     | 0.00465  | 0.12 | 0.14      | 0.08         | SNP                    |
| chr6_29892732_G        | 29892732 | 1.72 | 1.19     | 2.54     | 0.00468  | 0.23 | 0.24      | 0.19         | SNP                    |
| chr6_33048640_G        | 33048640 | 2.17 | 1.30     | 3.83     | 0.00471  | 0.10 | 0.12      | 0.06         | SNP                    |
| chr6_29893159_G        | 29893159 | 2.74 | 1.29     | 2.67     | 0.00474  | 0.23 | 0.24      | 0.20         | SNP                    |
| chr6_29892233_T        | 29892233 | 1.74 | 1.19     | 2.59     | 0.00486  | 0.26 | 0.27      | 0.23         | SNP                    |
| chr6_29896925_C        | 29896925 | 1.59 | 1.15     | 2.21     | 0.00517  | 0.34 | 0.36      | 0.30         | SNP                    |
| chr6_31777946_C        | 31777946 | 1.63 | 1.16     | 2.30     | 0.00535  | 0.36 | 0.38      | 0.32         | SNP                    |
| chr6_31118565_G        | 31118565 | 0.59 | 0.40     | 0.85     | 0.00540  | 0.29 | 0.28      | 0.31         | SNP                    |
| chr6_31246993_G        | 31246993 | 2.74 | 1.29     | 4.05     | 0.00541  | 0.09 | 0.11      | 0.09         | SNP                    |
| chr6_31244436_C        | 31244436 | 2.74 | 1.39     | 5.88     | 0.00562  | 0.06 | 0.08      | 0.03         | SNP                    |
| chr6_31371587_G        | 31371587 | 2.66 | 1.38     | 5.63     | 0.00597  | 0.07 | 0.08      | 0.04         | SNP                    |
| chr6_29910761_G        | 29910761 | 1.74 | 1.18     | 2.62     | 0.00628  | 0.33 | 0.35      | 0.29         | SNP                    |
| chr6_29856279_T        | 29856279 | 0.39 | 0.20     | 0.76     | 0.00647  | 0.04 | 0.03      | 0.08         | SNP                    |
| chr6_31239742_G        | 31239742 | 2.65 | 1.35     | 5.58     | 0.00673  | 0.07 | 0.08      | 0.04         | SNP                    |
| chr6_29858357_A        | 29858357 | 0.45 | 0.25     | 0.79     | 0.00673  | 0.04 | 0.03      | 0.07         | SNP                    |
| chr6_33043520_C        | 33043520 | 2.21 | 1.28     | 4.05     | 0.00685  | 0.08 | 0.09      | 0.04         | SNP                    |
| chr6_31475513_G        | 31475513 | 0.31 | 0.13     | 0.71     | 0.00700  | 0.02 | 0.01      | 0.04         | SNP                    |
| chr6_31921475_A        | 31921475 | 1.61 | 1.14     | 2.29     | 0.00721  | 0.40 | 0.42      | 0.36         | SNP                    |
| chr6_31117695_G        | 31117695 | 0.55 | 0.39     | 0.81     | 0.00754  | 0.05 | 0.07      | 0.03         | SNP                    |
| xHLA_2field_B_15_01    | 31321652 | 0.54 | 0.35     | 0.85     | 0.00763  | 0.11 | 0.10      | 0.14         | HLA (xHLA)             |
| chr6_29896636_C        | 29896636 | 1.66 | 1.15     | 2.43     | 0.00765  | 0.25 | 0.26      | 0.22         | SNP                    |
| chr6_30877760_A        | 30877760 | 0.61 | 0.42     | 0.88     | 0.00770  | 0.14 | 0.12      | 0.18         | SNP                    |
| chr6_31133870_A        | 31133870 | 2.64 | 1.34     | 5.65     | 0.00784  | 0.05 | 0.07      | 0.03         | SNP                    |
| chr6_31340819_A        | 31340819 | 0.64 | 0.49     | 0.90     | 0.00797  | 0.44 | 0.42      | 0.46         | SNP                    |
| chr6_31117673_C        | 31117673 | 2.64 | 1.34     | 5.68     | 0.00800  | 0.05 | 0.07      | 0.03         | SNP                    |
| chr6_31112484_C        | 31112484 | 2.62 | 1.33     | 5.62     | 0.00824  | 0.05 | 0.07      | 0.03         | SNP                    |
| chr6_31126697_C        | 31126697 | 2.62 | 1.33     | 5.62     | 0.00824  | 0.05 | 0.07      | 0.03         | SNP                    |
| chr6_31127694_G        | 31127694 | 2.62 | 1.33     | 5.62     | 0.00824  | 0.05 | 0.07      | 0.03         | SNP                    |
| chr6_31127800_C        | 31127800 | 2.62 | 1.33     | 5.62     | 0.00824  | 0.05 | 0.07      | 0.03         | SNP                    |
| chr6_29896713_G        | 29896713 | 1.63 | 1.14     | 2.37     | 0.00826  | 0.25 | 0.27      | 0.22         | SNP                    |
| chr6_31112899_T        | 31112899 | 0.58 | 0.38     | 0.87     | 0.00839  | 0.28 | 0.27      | 0.30         | SNP                    |
| chr6_31129707_C        | 31129707 | 2.61 | 1.33     | 5.60     | 0.00841  | 0.05 | 0.07      | 0.03         | SNP                    |
| chr6_31592064_C        | 31592064 | 0.40 | 0.20     | 0.79     | 0.00852  | 0.04 | 0.03      | 0.07         | SNP                    |
| chr6_31133663_C        | 31133663 | 2.60 | 1.32     | 5.58     | 0.00866  | 0.05 | 0.07      | 0.03         | SNP                    |
| chr6_30883910_C        | 30883910 | 1.57 | 1.11     | 2.08     | 0.00880  | 0.31 | 0.44      | 0.38         | SNP                    |
| chr6_32551568_C        | 32551568 | 0.64 | 0.46     | 0.89     | 0.00882  | 0.01 | 0.28      | 0.36         | SNP                    |
| chr6_29893982_C        | 29893982 | 1.75 | 1.16     | 2.71     | 0.00886  | 0.21 | 0.23      | 0.19         | SNP                    |
| chr6_32797488_T        | 32797488 | 1.57 | 1.12     | 2.21     | 0.00908  | 0.33 | 0.36      | 0.28         | SNP                    |
| chr6_32633819_A        | 32633819 | 0.60 | 0.41     | 0.88     | 0.00912  | 0.44 | 0.41      | 0.47         | SNP                    |
| xHLA_2field_DQB1_03_02 | 32627244 | 1.76 | 1.16     | 2.72     | 0.00926  | 0.22 | 0.24      | 0.19         | HLA (xHLA)             |
| chr6_30882856_A        | 30882856 | 1.53 | 1.11     | 2.11     | 0.00945  | 0.41 | 0.44      | 0.36         | SNP                    |
| chr6_31118898_A        | 31118898 | 2.68 | 1.32     | 5.95     | 0.00963  | 0.05 | 0.06      | 0.03         | SNP                    |
| chr6_31125257_C        | 31125257 | 2.58 | 1.30     | 5.57     | 0.00972  | 0.05 | 0.06      | 0.03         | SNP                    |
| chr6_32610401_A        | 32610401 | 1.73 | 1.15     | 2.64     | 0.00977  | 0.30 | 0.31      | 0.26         | SNP                    |
| chr6_30949822_C        | 30949822 | 0.62 | 0.43     | 0.89     | 0.00978  | 0.12 | 0.10      | 0.17         | SNP                    |
| chr6_31132956_G        | 31132956 | 2.59 | 1.30     | 5.58     | 0.00982  | 0.05 | 0.06      | 0.03         | SNP                    |
| chr6_32629514_T        | 32629514 | 0.49 | 0.29     | 0.84     | 0.00992  | 0.17 | 0.15      | 0.21         | SNP                    |
| chr6_31125402_C        | 31125402 | 2.58 | 1.30     | 5.57     | 0.00994  | 0.05 | 0.06      | 0.03         | SNP                    |
| chr6_32942354_G        | 32942354 | 0.31 | 0.13     | 0.76     | 0.01003  | 0.02 | 0.01      | 0.03         | SNP                    |
| chr6_32942355_G        | 32942355 | 0.31 | 0.13     | 0.76     | 0.01003  | 0.02 | 0.01      | 0.03         | SNP                    |
| chr6_31894626_A        | 31894626 | 1.53 | 1.11     | 2.13     | 0.01018  | 0.42 | 0.45      | 0.38         | SNP                    |
| chr6_32943108_T        | 32943108 | 0.32 | 0.13     | 0.76     | 0.01034  | 0.02 | 0.01      | 0.03         | SNP                    |
| chr6_31240041_C        | 31240041 | 1.64 | 1.13     | 2.42     | 0.01049  | 0.42 | 0.44      | 0.38         | SNP                    |
| chr6_29896773_C        | 29896773 | 1.62 | 1.13     | 2.37     | 0.01055  | 0.25 | 0.26      | 0.22         | SNP                    |
| chr6_31320654_C        | 31320654 | 2.64 | 1.33     | 5.63     | 0.01058  | 0.18 | 0.20      | 0.15         | SNP                    |
| chr6_30893             |          |      |          |          |          |      |           |              |                        |

|                     |          |      |      |       |         |      |      |      |           |
|---------------------|----------|------|------|-------|---------|------|------|------|-----------|
| chr6_32373378_A_T   | 32373378 | 0.52 | 0.31 | 0.87  | 0.01311 | 0.09 | 0.08 | 0.12 | SNP       |
| chr6_31129616_G_A   | 31129616 | 0.30 | 0.29 | 0.90  | 0.01342 | 0.29 | 0.28 | 0.31 | SNP       |
| xHLA_2field_C_04_01 | 31236526 | 2.18 | 1.21 | 4.21  | 0.01395 | 0.07 | 0.08 | 0.04 | HLA(xHLA) |
| chr6_29901865_G_C   | 29901865 | 1.54 | 1.10 | 2.18  | 0.01407 | 0.29 | 0.30 | 0.27 | SNP       |
| chr6_30890055_T_C   | 30890055 | 1.48 | 1.08 | 2.04  | 0.01444 | 0.41 | 0.43 | 0.36 | SNP       |
| chr6_32629259_T_C   | 32629259 | 1.66 | 1.11 | 2.50  | 0.01454 | 0.23 | 0.24 | 0.20 | SNP       |
| chr6_32184705_G_G   | 32184705 | 1.51 | 1.09 | 2.20  | 0.01474 | 0.32 | 0.34 | 0.27 | SNP       |
| chr6_31125569_G_T   | 31125569 | 0.68 | 0.50 | 0.93  | 0.01481 | 0.43 | 0.42 | 0.45 | SNP       |
| chr6_30878579_A_T   | 30878579 | 0.64 | 0.45 | 0.92  | 0.01494 | 0.15 | 0.13 | 0.19 | SNP       |
| chr6_32153409_A_C   | 32153409 | 1.54 | 1.09 | 2.19  | 0.01501 | 0.44 | 0.47 | 0.40 | SNP       |
| chr6_32187722_T_C   | 32187722 | 1.50 | 1.08 | 2.08  | 0.01504 | 0.43 | 0.46 | 0.37 | SNP       |
| chr6_31239501_G_T   | 31239501 | 2.43 | 1.23 | 5.19  | 0.01509 | 0.06 | 0.08 | 0.04 | SNP       |
| chr6_31320241_G_A   | 31320241 | 1.73 | 1.20 | 2.72  | 0.01518 | 0.22 | 0.22 | 0.21 | SNP       |
| chr6_29856552_C_T   | 29856552 | 0.45 | 0.23 | 0.85  | 0.01532 | 0.04 | 0.03 | 0.06 | SNP       |
| chr6_30887972_C_T   | 30887972 | 0.64 | 0.45 | 0.92  | 0.01543 | 0.14 | 0.12 | 0.18 | SNP       |
| chr6_31324764_C_A   | 31324764 | 0.37 | 0.16 | 0.82  | 0.01556 | 0.03 | 0.02 | 0.05 | SNP       |
| chr6_31321329_G_A   | 31321329 | 2.52 | 1.24 | 5.62  | 0.01585 | 0.05 | 0.06 | 0.03 | SNP       |
| chr6_31321336_G_A   | 31321336 | 2.52 | 1.24 | 5.62  | 0.01585 | 0.05 | 0.06 | 0.03 | SNP       |
| chr6_31462002_G_C   | 31462002 | 0.53 | 0.32 | 0.89  | 0.01600 | 0.09 | 0.07 | 0.13 | SNP       |
| chr6_31112925_T_C   | 31112925 | 0.61 | 0.40 | 0.91  | 0.01602 | 0.28 | 0.28 | 0.29 | SNP       |
| chr6_31105633_T_C   | 31105633 | 0.63 | 0.43 | 0.92  | 0.01619 | 0.22 | 0.21 | 0.25 | SNP       |
| chr6_31320562_C_T   | 31320562 | 0.57 | 0.36 | 0.90  | 0.01631 | 0.20 | 0.20 | 0.22 | SNP       |
| chr6_31126232_C_T   | 31126232 | 2.53 | 1.23 | 5.67  | 0.01647 | 0.05 | 0.07 | 0.03 | SNP       |
| chr6_30515043_T_C   | 30515043 | 2.26 | 1.18 | 4.47  | 0.01654 | 0.12 | 0.12 | 0.12 | SNP       |
| chr6_30876996_G_C   | 30876996 | 0.65 | 0.45 | 0.92  | 0.01655 | 0.15 | 0.13 | 0.19 | SNP       |
| chr6_31321110_C_T   | 31321110 | 1.80 | 1.13 | 2.97  | 0.01658 | 0.10 | 0.11 | 0.07 | SNP       |
| chr6_31843924_T_C   | 31843924 | 1.53 | 1.08 | 2.17  | 0.01694 | 0.38 | 0.40 | 0.34 | SNP       |
| chr6_3132160801_T_C | 31321608 | 1.91 | 1.10 | 3.35  | 0.01701 | 0.08 | 0.06 | 0.05 | SNP       |
| chr6_31320164_G_A   | 31320164 | 1.67 | 1.10 | 2.57  | 0.01743 | 0.23 | 0.24 | 0.22 | SNP       |
| chr6_31239430_C_T   | 31239430 | 0.61 | 0.41 | 0.91  | 0.01767 | 0.46 | 0.44 | 0.52 | SNP       |
| chr6_30880757_G_A   | 30880757 | 1.46 | 1.07 | 1.99  | 0.01771 | 0.41 | 0.43 | 0.35 | SNP       |
| chr6_30887666_T_C   | 30887666 | 0.65 | 0.46 | 0.93  | 0.01777 | 0.15 | 0.13 | 0.19 | SNP       |
| chr6_31126409_G_G   | 31126409 | 0.44 | 0.22 | 0.59  | 0.01794 | 0.06 | 0.07 | 0.03 | SNP       |
| chr6_31383239_T_C   | 31383239 | 1.91 | 1.14 | 3.34  | 0.01808 | 0.09 | 0.11 | 0.06 | SNP       |
| chr6_30882634_C_T   | 30882634 | 1.49 | 1.07 | 2.09  | 0.01848 | 0.41 | 0.43 | 0.37 | SNP       |
| chr6_33071754_C_A   | 33071754 | 1.83 | 1.13 | 3.10  | 0.01848 | 0.09 | 0.10 | 0.06 | SNP       |
| chr6_31236467_G_T   | 31236467 | 0.71 | 0.54 | 0.94  | 0.01849 | 0.34 | 0.32 | 0.39 | SNP       |
| chr6_30889389_T_C   | 30889389 | 0.64 | 0.44 | 0.93  | 0.01901 | 0.13 | 0.11 | 0.17 | SNP       |
| chr6_31466051_T_A   | 31466051 | 0.55 | 0.33 | 0.91  | 0.01905 | 0.09 | 0.07 | 0.13 | SNP       |
| chr6_31125158_T_C   | 31125158 | 0.69 | 0.51 | 0.94  | 0.01938 | 0.43 | 0.42 | 0.45 | SNP       |
| chr6_30877202_T_C   | 30877202 | 0.65 | 0.45 | 0.93  | 0.01944 | 0.15 | 0.13 | 0.18 | SNP       |
| chr6_32557962_A_G   | 32557962 | 0.63 | 0.43 | 0.93  | 0.01955 | 0.23 | 0.21 | 0.28 | SNP       |
| chr6_32134656_T_C   | 32134656 | 0.50 | 0.28 | 0.90  | 0.01957 | 0.20 | 0.18 | 0.24 | SNP       |
| chr6_32627934_G_A   | 32627934 | 0.55 | 0.33 | 0.91  | 0.01969 | 0.18 | 0.15 | 0.21 | SNP       |
| chr6_29856774_A_G   | 29856774 | 1.72 | 1.10 | 2.75  | 0.01985 | 0.16 | 0.17 | 0.15 | SNP       |
| chr6_32187605_G_A   | 32187605 | 1.47 | 1.07 | 2.05  | 0.01999 | 0.45 | 0.48 | 0.39 | SNP       |
| chr6_32410691_G_A   | 32410691 | 0.55 | 0.33 | 0.91  | 0.02024 | 0.17 | 0.15 | 0.21 | SNP       |
| chr6_32628420_C_T   | 32628420 | 1.57 | 1.08 | 2.30  | 0.02031 | 0.45 | 0.47 | 0.41 | SNP       |
| chr6_30888169_G_A   | 30888169 | 0.64 | 0.44 | 0.96  | 0.02032 | 0.41 | 0.43 | 0.36 | SNP       |
| chr6_33050078_A_G   | 33050078 | 1.73 | 1.11 | 2.80  | 0.02048 | 0.10 | 0.11 | 0.07 | SNP       |
| chr6_33050079_C_G   | 33050079 | 1.73 | 1.11 | 2.80  | 0.02048 | 0.10 | 0.11 | 0.07 | SNP       |
| chr6_31117619_C_T   | 31117619 | 0.62 | 0.41 | 0.93  | 0.02070 | 0.29 | 0.28 | 0.30 | SNP       |
| chr6_32633941_A_G   | 32633941 | 0.55 | 0.33 | 0.92  | 0.02133 | 0.17 | 0.15 | 0.21 | SNP       |
| chr6_31320309_T_C   | 31320309 | 0.71 | 0.53 | 0.95  | 0.02138 | 0.46 | 0.44 | 0.49 | SNP       |
| chr6_30885639_A_G   | 30885639 | 1.43 | 1.06 | 1.96  | 0.02148 | 0.41 | 0.44 | 0.37 | SNP       |
| chr6_30878919_T_C   | 30878919 | 0.65 | 0.46 | 0.94  | 0.02163 | 0.15 | 0.13 | 0.18 | SNP       |
| chr6_33050499_A_G   | 33050499 | 1.72 | 1.10 | 2.79  | 0.02197 | 0.10 | 0.11 | 0.07 | SNP       |
| chr6_32636138_A_G   | 32636138 | 1.50 | 1.06 | 2.13  | 0.02246 | 0.32 | 0.34 | 0.28 | SNP       |
| chr6_31549556_G_G   | 31549556 | 0.50 | 0.27 | 0.91  | 0.02266 | 0.04 | 0.03 | 0.07 | SNP       |
| chr6_32634318_C_A   | 32634318 | 0.55 | 0.33 | 0.92  | 0.02296 | 0.17 | 0.15 | 0.21 | SNP       |
| chr6_33052950_T_C   | 33052950 | 1.75 | 1.10 | 2.88  | 0.02307 | 0.09 | 0.11 | 0.07 | SNP       |
| chr6_29910801_C_A   | 29910801 | 1.63 | 1.08 | 2.51  | 0.02317 | 0.27 | 0.28 | 0.24 | SNP       |
| chr6_32374595_G_G   | 32374595 | 0.51 | 0.28 | 0.91  | 0.02317 | 0.14 | 0.13 | 0.18 | SNP       |
| chr6_32375795_G_T   | 32375795 | 0.51 | 0.28 | 0.91  | 0.02317 | 0.14 | 0.13 | 0.18 | SNP       |
| chr6_31236035_G_A   | 31236035 | 1.95 | 1.12 | 3.59  | 0.02331 | 0.07 | 0.08 | 0.05 | SNP       |
| chr6_31917540_T_C   | 31917540 | 1.47 | 1.06 | 2.06  | 0.02340 | 0.40 | 0.42 | 0.36 | SNP       |
| chr6_30850191_T_C   | 30850191 | 0.66 | 0.47 | 0.95  | 0.02344 | 0.15 | 0.13 | 0.18 | SNP       |
| chr6_30851194_G_G   | 30851194 | 0.66 | 0.47 | 0.95  | 0.02344 | 0.15 | 0.13 | 0.18 | SNP       |
| chr6_30854090_G_T   | 30854090 | 0.66 | 0.47 | 0.95  | 0.02344 | 0.15 | 0.13 | 0.18 | SNP       |
| chr6_30855251_G_A   | 30855251 | 0.66 | 0.47 | 0.95  | 0.02344 | 0.15 | 0.13 | 0.18 | SNP       |
| chr6_30857542_G_A   | 30857542 | 0.66 | 0.47 | 0.95  | 0.02344 | 0.15 | 0.13 | 0.18 | SNP       |
| chr6_31326959_C_T   | 31326959 | 0.35 | 0.14 | 0.87  | 0.02345 | 0.02 | 0.01 | 0.03 | SNP       |
| chr6_32793981_C_A   | 32793981 | 1.52 | 1.06 | 2.20  | 0.02347 | 0.25 | 0.28 | 0.21 | SNP       |
| chr6_32710407_T_C   | 32710407 | 0.67 | 0.33 | 0.93  | 0.02367 | 0.09 | 0.08 | 0.11 | SNP       |
| chr6_30859520_C_T   | 30859520 | 0.66 | 0.46 | 0.95  | 0.02372 | 0.13 | 0.12 | 0.17 | SNP       |
| chr6_29853750_G_T   | 29853750 | 1.68 | 1.08 | 2.67  | 0.02386 | 0.16 | 0.17 | 0.15 | SNP       |
| chr6_31241664_G_A   | 31241664 | 2.17 | 1.13 | 4.32  | 0.02400 | 0.15 | 0.15 | 0.15 | SNP       |
| chr6_31320642_C_T   | 31320642 | 1.54 | 1.06 | 2.25  | 0.02416 | 0.18 | 0.20 | 0.15 | SNP       |
| chr6_30887988_T_C   | 30887988 | 1.42 | 1.05 | 1.93  | 0.02420 | 0.41 | 0.43 | 0.36 | SNP       |
| chr6_32629282_A_T   | 32629282 | 0.55 | 0.33 | 0.93  | 0.02423 | 0.17 | 0.15 | 0.21 | SNP       |
| chr6_32629289_C_A   | 32629289 | 0.56 | 0.33 | 0.93  | 0.02431 | 0.17 | 0.15 | 0.21 | SNP       |
| chr6_31349844_A_G   | 31349844 | 2.60 | 1.19 | 6.39  | 0.02436 | 0.04 | 0.05 | 0.02 | SNP       |
| chr6_31324051_C_A   | 31324051 | 2.01 | 1.12 | 3.81  | 0.02451 | 0.08 | 0.10 | 0.06 | SNP       |
| chr6_33054659_A_G   | 33054659 | 1.69 | 1.09 | 2.73  | 0.02489 | 0.10 | 0.11 | 0.07 | SNP       |
| chr6_31780721_A_G   | 31780721 | 0.71 | 0.53 | 0.96  | 0.02519 | 0.31 | 0.29 | 0.36 | SNP       |
| chr6_32629347_T_C   | 32629347 | 1.54 | 1.06 | 2.25  | 0.02523 | 0.45 | 0.47 | 0.42 | SNP       |
| chr6_30877054_G_A   | 30877054 | 0.66 | 0.46 | 0.95  | 0.02525 | 0.13 | 0.12 | 0.17 | SNP       |
| chr6_32944575_T_C   | 32944575 | 0.38 | 0.16 | 0.88  | 0.02525 | 0.02 | 0.01 | 0.03 | SNP       |
| chr6_31243785_T_T   | 31243785 | 1.59 | 1.07 | 2.40  | 0.02528 | 0.17 | 0.18 | 0.14 | SNP       |
| chr6_32633879_G_G   | 32633879 | 0.56 | 0.34 | 0.93  | 0.02545 | 0.18 | 0.15 | 0.21 | SNP       |
| chr6_33050089_G_A   | 33050089 | 1.70 | 1.08 | 2.76  | 0.02557 | 0.10 | 0.11 | 0.07 | SNP       |
| chr6_30861000_C_T   | 30861000 | 1.49 | 1.05 | 2.12  | 0.02564 | 0.42 | 0.44 | 0.39 | SNP       |
| chr6_29911086_T_C   | 29911086 | 1.56 | 1.06 | 2.32  | 0.02569 | 0.26 | 0.28 | 0.23 | SNP       |
| chr6_32803408_C_A   | 32803408 | 0.44 | 0.21 | 0.91  | 0.02573 | 0.03 | 0.02 | 0.05 | SNP       |
| chr6_30867105_C_T   | 30867105 | 0.47 | 0.25 | 0.95  | 0.02575 | 0.15 | 0.13 | 0.18 | SNP       |
| chr6_32629091_C_G   | 32629091 | 0.56 | 0.33 | 0.93  | 0.02582 | 0.17 | 0.15 | 0.21 | SNP       |
| chr6_32634126_G_A   | 32634126 | 0.56 | 0.33 | 0.93  | 0.02583 | 0.17 | 0.15 | 0.21 | SNP       |
| chr6_30878769_C_T   | 30878769 | 0.67 | 0.47 | 0.95  | 0.02595 | 0.15 | 0.13 | 0.18 | SNP       |
| chr6_33053399_T_C   | 33053399 | 1.71 | 1.09 | 2.81  | 0.02597 | 0.10 | 0.11 | 0.07 | SNP       |
| chr6_33647936_C_T   | 33647936 | 4.21 | 1.35 | 18.55 | 0.02598 | 0.02 | 0.03 | 0.01 | SNP       |
| chr6_33050473_A_G   | 33050473 | 1.69 | 1.08 | 2.74  | 0.02609 | 0.10 | 0.11 | 0.07 | SNP       |
| chr6_32558183_G_T   | 32558183 | 1.44 | 1.04 | 1.98  | 0.02612 | 0.45 | 0.43 | 0.50 | SNP       |
| chr6_32798795_A_C   | 32798795 | 1.42 | 1.05 | 1.94  | 0.02620 | 0.39 | 0.42 | 0.34 | SNP       |
| chr6_31246324_A_C   | 31246324 | 2.16 | 1.11 | 4.34  | 0.02643 | 0.15 | 0.15 | 0.15 | SNP       |
| chr6_33055079_A_G   | 33055079 | 1.68 | 1.08 | 2.71  | 0.02648 | 0.10 | 0.11 | 0.07 | SNP       |
| chr6_30865115_G_A   | 30865115 | 0.60 | 0.39 | 0.94  | 0.02655 | 0.14 | 0.12 | 0.18 | SNP       |
| chr6_32634952_G_T   | 32634952 | 0.56 | 0.33 | 0.94  | 0.02684 | 0.17 | 0.15 | 0.21 | SNP       |
| chr6_32782112_C_T   | 32782112 | 0.45 | 0.22 | 0.92  | 0.02699 | 0.03 | 0.02 | 0.05 | SNP       |
| chr6_32631109_A_T   | 32631109 | 0.50 | 0.27 | 0.93  | 0.02718 | 0.16 | 0.14 | 0.21 | SNP       |
| chr6_30884700_C_T   | 30884700 | 1.41 | 1.04 | 1.92  | 0.02727 | 0.41 | 0.43 | 0.36 | SNP       |
| chr6_30920957_G_A   | 30920957 | 0.67 | 0.47 | 0.96  | 0.02730 | 0.14 | 0.12 | 0.18 | SNP       |
| chr6_30885686_T_A   | 30885686 | 1.42 | 1.04 | 1.94  | 0.02732 | 0.41 | 0.43 | 0.36 |           |

|                        |          |      |      |         |         |      |      |      |            |
|------------------------|----------|------|------|---------|---------|------|------|------|------------|
| chr6_29908676_T_A      | 29908676 | 1.72 | 1.06 | 2.85    | 0.02987 | 0.15 | 0.16 | 0.14 | SNP        |
| chr6_31125993_G_G      | 31125993 | 5.15 | 1.13 | 0.05995 | 2.30    | 0.15 | 0.06 | 0.11 | SNP        |
| chr6_33055123_A_G      | 33055123 | 1.66 | 1.07 | 2.69    | 0.03021 | 0.10 | 0.11 | 0.07 | SNP        |
| chr6_29913430_C_T      | 29913430 | 1.56 | 1.05 | 2.36    | 0.03034 | 0.19 | 0.20 | 0.18 | SNP        |
| chr6_30858857_C_T      | 30858857 | 0.68 | 0.47 | 0.96    | 0.03034 | 0.15 | 0.13 | 0.18 | SNP        |
| chr6_30885821_G_A      | 30885821 | 1.41 | 1.04 | 1.93    | 0.03050 | 0.41 | 0.43 | 0.37 | SNP        |
| chr6_31726698_C_A      | 31726698 | 2.11 | 1.04 | 2.04    | 0.03068 | 0.38 | 0.40 | 0.34 | SNP        |
| chr6_31245796_C_T      | 31245796 | 2.11 | 1.09 | 4.24    | 0.03072 | 0.15 | 0.15 | 0.15 | SNP        |
| chr6_31245821_A_G      | 31245821 | 2.12 | 1.09 | 4.27    | 0.03083 | 0.15 | 0.15 | 0.15 | SNP        |
| chr6_33053682_G_A      | 33053682 | 1.64 | 1.06 | 2.62    | 0.03092 | 0.10 | 0.11 | 0.07 | SNP        |
| chr6_33053772_G_A      | 33053772 | 1.64 | 1.06 | 2.62    | 0.03092 | 0.10 | 0.11 | 0.07 | SNP        |
| chr6_33053780_T_A      | 33053780 | 1.64 | 1.06 | 2.62    | 0.03092 | 0.10 | 0.11 | 0.07 | SNP        |
| chr6_33053789_A_G      | 33053789 | 1.64 | 1.06 | 2.62    | 0.03092 | 0.10 | 0.11 | 0.07 | SNP        |
| chr6_33053868_A_G      | 33053868 | 1.64 | 1.06 | 2.62    | 0.03092 | 0.10 | 0.11 | 0.07 | SNP        |
| chr6_33053871_A_G      | 33053871 | 1.64 | 1.06 | 2.62    | 0.03092 | 0.10 | 0.11 | 0.07 | SNP        |
| chr6_33053877_G_A      | 33053877 | 1.64 | 1.06 | 2.62    | 0.03092 | 0.10 | 0.11 | 0.07 | SNP        |
| chr6_33053887_A_G      | 33053887 | 1.64 | 1.06 | 2.62    | 0.03092 | 0.10 | 0.11 | 0.07 | SNP        |
| chr6_33053890_G_A      | 33053890 | 1.64 | 1.06 | 2.62    | 0.03092 | 0.10 | 0.11 | 0.07 | SNP        |
| chr6_33053982_G_C      | 33053982 | 1.64 | 1.06 | 2.62    | 0.03092 | 0.10 | 0.11 | 0.07 | SNP        |
| chr6_33054091_C_T      | 33054091 | 1.64 | 1.06 | 2.62    | 0.03092 | 0.10 | 0.11 | 0.07 | SNP        |
| chr6_33054141_T_C      | 33054141 | 1.64 | 1.06 | 2.62    | 0.03092 | 0.10 | 0.11 | 0.07 | SNP        |
| chr6_33054142_G_C      | 33054142 | 1.64 | 1.06 | 2.62    | 0.03092 | 0.10 | 0.11 | 0.07 | SNP        |
| chr6_33054148_C_T      | 33054148 | 1.64 | 1.06 | 2.62    | 0.03092 | 0.10 | 0.11 | 0.07 | SNP        |
| chr6_33054149_T_C      | 33054149 | 1.64 | 1.06 | 2.62    | 0.03092 | 0.10 | 0.11 | 0.07 | SNP        |
| chr6_33054152_A_G      | 33054152 | 1.64 | 1.06 | 2.62    | 0.03092 | 0.10 | 0.11 | 0.07 | SNP        |
| chr6_33054155_C_T      | 33054155 | 1.64 | 1.06 | 2.62    | 0.03092 | 0.10 | 0.11 | 0.07 | SNP        |
| chr6_33054156_G_G      | 33054156 | 1.64 | 1.06 | 2.62    | 0.03092 | 0.10 | 0.11 | 0.07 | SNP        |
| chr6_33054231_T_C      | 33054231 | 1.64 | 1.06 | 2.62    | 0.03092 | 0.10 | 0.11 | 0.07 | SNP        |
| chr6_33054235_T_G      | 33054235 | 1.64 | 1.06 | 2.62    | 0.03092 | 0.10 | 0.11 | 0.07 | SNP        |
| chr6_33054268_C_A      | 33054268 | 1.64 | 1.06 | 2.62    | 0.03092 | 0.10 | 0.11 | 0.07 | SNP        |
| chr6_33054280_T_C      | 33054280 | 1.64 | 1.06 | 2.62    | 0.03092 | 0.10 | 0.11 | 0.07 | SNP        |
| chr6_33054281_A_G      | 33054281 | 1.64 | 1.06 | 2.62    | 0.03092 | 0.10 | 0.11 | 0.07 | SNP        |
| chr6_33054302_T_C      | 33054302 | 1.64 | 1.06 | 2.62    | 0.03092 | 0.10 | 0.11 | 0.07 | SNP        |
| chr6_33054325_G_C      | 33054325 | 1.64 | 1.06 | 2.62    | 0.03092 | 0.10 | 0.11 | 0.07 | SNP        |
| chr6_33054331_T_C      | 33054331 | 1.64 | 1.06 | 2.62    | 0.03092 | 0.10 | 0.11 | 0.07 | SNP        |
| chr6_33054457_A_G      | 33054457 | 1.64 | 1.06 | 2.62    | 0.03092 | 0.10 | 0.11 | 0.07 | SNP        |
| chr6_33054550_G_A      | 33054550 | 1.64 | 1.06 | 2.62    | 0.03092 | 0.10 | 0.11 | 0.07 | SNP        |
| chr6_33054579_T_C      | 33054579 | 1.64 | 1.06 | 2.62    | 0.03092 | 0.10 | 0.11 | 0.07 | SNP        |
| chr6_33054586_A_G      | 33054586 | 1.64 | 1.06 | 2.62    | 0.03092 | 0.10 | 0.11 | 0.07 | SNP        |
| chr6_33054595_C_T      | 33054595 | 1.64 | 1.06 | 2.62    | 0.03092 | 0.10 | 0.11 | 0.07 | SNP        |
| chr6_33054619_G_A      | 33054619 | 1.64 | 1.06 | 2.62    | 0.03092 | 0.10 | 0.11 | 0.07 | SNP        |
| chr6_33054656_A_C      | 33054656 | 1.64 | 1.06 | 2.62    | 0.03092 | 0.10 | 0.11 | 0.07 | SNP        |
| chr6_33054675_G_G      | 33054675 | 1.64 | 1.06 | 2.62    | 0.03092 | 0.10 | 0.11 | 0.07 | SNP        |
| chr6_33054683_A_G      | 33054683 | 1.64 | 1.06 | 2.62    | 0.03092 | 0.10 | 0.11 | 0.07 | SNP        |
| chr6_33054687_G_A      | 33054687 | 1.64 | 1.06 | 2.62    | 0.03092 | 0.10 | 0.11 | 0.07 | SNP        |
| chr6_33054711_G_T      | 33054711 | 1.64 | 1.06 | 2.62    | 0.03092 | 0.10 | 0.11 | 0.07 | SNP        |
| chr6_33054721_C_T      | 33054721 | 1.64 | 1.06 | 2.62    | 0.03092 | 0.10 | 0.11 | 0.07 | SNP        |
| chr6_33054807_A_G      | 33054807 | 1.64 | 1.06 | 2.62    | 0.03092 | 0.10 | 0.11 | 0.07 | SNP        |
| chr6_33054890_C_T      | 33054890 | 1.64 | 1.06 | 2.62    | 0.03092 | 0.10 | 0.11 | 0.07 | SNP        |
| chr6_31429913_G_C      | 31429913 | 0.43 | 0.20 | 0.93    | 0.03099 | 0.03 | 0.02 | 0.04 | SNP        |
| xHLA_2field_DRB1_03_01 | 32546552 | 0.43 | 0.20 | 0.92    | 0.03108 | 0.12 | 0.11 | 0.16 | HLA (xHLA) |
| chr6_33055009_C_A      | 33055009 | 1.64 | 1.06 | 2.62    | 0.03136 | 0.10 | 0.11 | 0.07 | SNP        |
| chr6_32628559_T_C      | 32628559 | 0.56 | 0.33 | 0.95    | 0.03148 | 0.17 | 0.15 | 0.21 | SNP        |
| chr6_32628560_G_G      | 32628560 | 0.56 | 0.33 | 0.95    | 0.03164 | 0.17 | 0.15 | 0.21 | SNP        |
| chr6_32629331_A_G      | 32629331 | 1.51 | 1.04 | 2.20    | 0.03177 | 0.45 | 0.47 | 0.42 | SNP        |
| chr6_31544189_A_G      | 31544189 | 0.53 | 0.29 | 0.95    | 0.03183 | 0.05 | 0.04 | 0.07 | SNP        |
| chr6_29897225_C_T      | 29897225 | 0.53 | 0.29 | 0.94    | 0.03186 | 0.04 | 0.03 | 0.06 | SNP        |
| chr6_29858253_G_A      | 29858253 | 1.64 | 1.05 | 2.62    | 0.03188 | 0.16 | 0.17 | 0.15 | SNP        |
| chr6_31324953_T_C      | 31324953 | 0.63 | 0.41 | 0.96    | 0.03206 | 0.40 | 0.39 | 0.41 | SNP        |
| chr6_30882781_G_T      | 30882781 | 1.41 | 1.03 | 1.93    | 0.03211 | 0.41 | 0.43 | 0.36 | SNP        |
| chr6_33048542_C_T      | 33048542 | 1.36 | 1.03 | 1.81    | 0.03225 | 0.29 | 0.30 | 0.24 | SNP        |
| chr6_31379059_A_T      | 31379059 | 0.36 | 0.14 | 0.92    | 0.03249 | 0.02 | 0.01 | 0.03 | SNP        |
| chr6_32629509_G_C      | 32629509 | 1.50 | 1.04 | 2.19    | 0.03251 | 0.46 | 0.47 | 0.43 | SNP        |
| chr6_33053455_T_C      | 33053455 | 1.64 | 1.06 | 2.73    | 0.03255 | 0.10 | 0.11 | 0.07 | SNP        |
| chr6_31322790_T_A      | 31322790 | 2.35 | 1.09 | 5.24    | 0.03258 | 0.13 | 0.13 | 0.13 | SNP        |
| chr6_32633897_T_A      | 32633897 | 0.57 | 0.34 | 0.96    | 0.03269 | 0.17 | 0.15 | 0.21 | SNP        |
| chr6_32633898_C_A      | 32633898 | 0.57 | 0.34 | 0.96    | 0.03269 | 0.17 | 0.15 | 0.21 | SNP        |
| chr6_32634613_T_T      | 32634613 | 0.57 | 0.34 | 0.96    | 0.03279 | 0.17 | 0.15 | 0.21 | SNP        |
| chr6_31324955_T_C      | 31324955 | 0.63 | 0.41 | 0.96    | 0.03280 | 0.12 | 0.11 | 0.16 | SNP        |
| chr6_32629417_G_C      | 32629417 | 0.57 | 0.34 | 0.96    | 0.03292 | 0.17 | 0.15 | 0.21 | SNP        |
| chr6_32629400_A_G      | 32629400 | 1.50 | 1.04 | 2.19    | 0.03293 | 0.46 | 0.48 | 0.43 | SNP        |
| chr6_31239733_C_T      | 31239733 | 0.48 | 0.24 | 0.95    | 0.03302 | 0.05 | 0.03 | 0.07 | SNP        |
| chr6_31239727_C_A      | 31239727 | 0.48 | 0.24 | 0.95    | 0.03305 | 0.05 | 0.03 | 0.07 | SNP        |
| chr6_31239601_C_T      | 31239601 | 0.47 | 0.23 | 0.94    | 0.03319 | 0.04 | 0.03 | 0.06 | SNP        |
| chr6_31238662_C_T      | 31238662 | 0.51 | 0.27 | 0.95    | 0.03316 | 0.04 | 0.03 | 0.06 | SNP        |
| chr6_31237040_A_T      | 31237040 | 0.51 | 0.27 | 0.95    | 0.03326 | 0.04 | 0.03 | 0.06 | SNP        |
| chr6_31237254_C_T      | 31237254 | 0.51 | 0.27 | 0.95    | 0.03326 | 0.04 | 0.03 | 0.06 | SNP        |
| chr6_31238179_C_T      | 31238179 | 0.51 | 0.27 | 0.95    | 0.03326 | 0.04 | 0.03 | 0.06 | SNP        |
| chr6_31238334_C_T      | 31238334 | 0.51 | 0.27 | 0.95    | 0.03326 | 0.04 | 0.03 | 0.06 | SNP        |
| chr6_32627851_G_A      | 32627851 | 0.56 | 0.33 | 0.96    | 0.03354 | 0.20 | 0.18 | 0.23 | SNP        |
| chr6_31122126_C_G      | 31122126 | 0.69 | 0.49 | 0.97    | 0.03362 | 0.42 | 0.40 | 0.44 | SNP        |
| chr6_33053968_T_A      | 33053968 | 1.63 | 1.06 | 2.61    | 0.03365 | 0.10 | 0.11 | 0.07 | SNP        |
| chr6_33053971_T_C      | 33053971 | 1.63 | 1.06 | 2.61    | 0.03365 | 0.10 | 0.11 | 0.07 | SNP        |
| chr6_33050125_A_G      | 33050125 | 1.68 | 1.06 | 2.78    | 0.03369 | 0.09 | 0.10 | 0.07 | SNP        |
| chr6_33054353_A_G      | 33054353 | 1.63 | 1.05 | 2.61    | 0.03376 | 0.10 | 0.11 | 0.07 | SNP        |
| chr6_33054355_A_C      | 33054355 | 1.63 | 1.05 | 2.61    | 0.03376 | 0.10 | 0.11 | 0.07 | SNP        |
| chr6_32627830_C_T      | 32627830 | 0.57 | 0.34 | 0.96    | 0.03378 | 0.17 | 0.15 | 0.21 | SNP        |
| chr6_32635197_T_C      | 32635197 | 0.57 | 0.34 | 0.96    | 0.03378 | 0.17 | 0.15 | 0.21 | SNP        |
| chr6_31510105_C_A      | 31510105 | 1.60 | 1.04 | 2.47    | 0.03379 | 0.31 | 0.33 | 0.27 | SNP        |
| chr6_31275663_C_A      | 31275663 | 1.61 | 1.05 | 2.53    | 0.03380 | 0.16 | 0.17 | 0.16 | SNP        |
| chr6_31350232_G_A      | 31350232 | 0.62 | 0.40 | 0.96    | 0.03384 | 0.23 | 0.23 | 0.24 | SNP        |
| chr6_32339925_T_A      | 32339925 | 1.41 | 1.03 | 1.94    | 0.03418 | 0.32 | 0.34 | 0.29 | SNP        |
| chr6_32634243_G_A      | 32634243 | 0.58 | 0.34 | 0.96    | 0.03441 | 0.17 | 0.15 | 0.21 | SNP        |
| chr6_32636364_A_G      | 32636364 | 1.40 | 1.03 | 1.92    | 0.03455 | 0.43 | 0.45 | 0.40 | SNP        |
| chr6_32627494_T_C      | 32627494 | 1.45 | 1.03 | 2.08    | 0.03473 | 0.35 | 0.36 | 0.32 | SNP        |
| chr6_31246323_A_G      | 31246323 | 0.51 | 0.27 | 0.96    | 0.03479 | 0.04 | 0.03 | 0.06 | SNP        |
| chr6_31243846_G_T      | 31243846 | 2.08 | 1.07 | 4.21    | 0.03491 | 0.15 | 0.15 | 0.15 | SNP        |
| chr6_32628558_G_A      | 32628558 | 0.57 | 0.33 | 0.96    | 0.03492 | 0.17 | 0.15 | 0.20 | SNP        |
| chr6_33050118_C_T      | 33050118 | 1.67 | 1.05 | 2.73    | 0.03511 | 0.09 | 0.11 | 0.07 | SNP        |
| chr6_31239999_A_T      | 31239999 | 0.55 | 0.31 | 0.96    | 0.03525 | 0.06 | 0.05 | 0.08 | SNP        |
| chr6_32786917_A_G      | 32786917 | 1.48 | 1.03 | 2.15    | 0.03526 | 0.25 | 0.27 | 0.21 | SNP        |
| chr6_31239100_A_G      | 31239100 | 0.48 | 0.24 | 0.95    | 0.03554 | 0.04 | 0.03 | 0.06 | SNP        |
| chr6_30850582_G_A      | 30850582 | 1.40 | 1.03 | 1.92    | 0.03555 | 0.40 | 0.42 | 0.36 | SNP        |
| chr6_31321407_C_T      | 31321407 | 1.64 | 1.05 | 2.64    | 0.03558 | 0.10 | 0.11 | 0.08 | SNP        |
| chr6_31239869_T_C      | 31239869 | 0.73 | 0.55 | 0.98    | 0.03558 | 0.29 | 0.27 | 0.33 | SNP        |
| chr6_33054046_G_G      | 33054046 | 1.62 | 1.05 | 2.61    | 0.03560 | 0.10 | 0.11 | 0.07 | SNP        |
| chr6_33054057_G_A      | 33054057 | 1.62 | 1.05 | 2.61    | 0.03560 | 0.10 | 0.11 | 0.07 | SNP        |
| chr6_33054071_G_C      | 33054071 | 1.62 | 1.05 | 2.61    | 0.03560 | 0.10 | 0.11 | 0.07 | SNP        |
| chr6_32604585_A_T      | 32604585 | 1.57 | 1.03 | 2.41    | 0.03583 | 0.31 | 0.32 | 0.29 | SNP        |
| chr6_30851305_G_C      | 30851305 | 0.68 | 0.48 | 0.98    | 0.03589 | 0.14 | 0.13 | 0.18 | SNP        |
| chr6_32633697_T_A      | 32633697 | 0.58 | 0.35 | 0.97    | 0.03603 | 0.17 | 0.15 | 0.21 | SNP        |
| chr6_33050526_C_T      | 33050526 | 1.65 | 1.05 | 2.68    | 0.03605 | 0.10 | 0.11 | 0.07 | SNP        |
| chr6_31239630_C_T      | 31239630 | 0.47 | 0.23 | 0.96    | 0.03614 | 0.04 | 0.03 | 0.07 | SNP        |
|                        |          |      |      |         |         |      |      |      |            |

|                     |          |      |      |      |         |      |      |      |            |
|---------------------|----------|------|------|------|---------|------|------|------|------------|
| chr6_32406611_C_A   | 32406611 | 0.59 | 0.36 | 0.97 | 0.03740 | 0.17 | 0.15 | 0.21 | SNP        |
| chr6_29895635_A_A   | 29895635 | 1.61 | 1.04 | 2.55 | 0.03745 | 0.17 | 0.17 | 0.15 | SNP        |
| chr6_29892815_A_G   | 29892815 | 1.61 | 1.04 | 2.55 | 0.03755 | 0.17 | 0.17 | 0.16 | SNP        |
| chr6_33054342_T_C   | 33054342 | 1.61 | 1.04 | 2.59 | 0.03770 | 0.10 | 0.11 | 0.07 | SNP        |
| chr6_33054373_C_T   | 33054373 | 1.61 | 1.04 | 2.59 | 0.03770 | 0.10 | 0.11 | 0.07 | SNP        |
| chr6_33054381_T_C   | 33054381 | 1.61 | 1.04 | 2.59 | 0.03770 | 0.10 | 0.11 | 0.07 | SNP        |
| chr6_33054385_C_T   | 33054385 | 1.61 | 1.04 | 2.59 | 0.03770 | 0.10 | 0.11 | 0.07 | SNP        |
| chr6_32636172_C_T   | 32636172 | 1.44 | 1.02 | 2.03 | 0.03777 | 0.32 | 0.34 | 0.29 | SNP        |
| chr6_32636154_C_G   | 32636154 | 1.44 | 1.02 | 2.04 | 0.03783 | 0.32 | 0.33 | 0.29 | SNP        |
| chr6_32629269_C_T   | 32629269 | 1.45 | 1.02 | 2.06 | 0.03790 | 0.31 | 0.33 | 0.28 | SNP        |
| chr6_32606987_T_G   | 32606987 | 1.52 | 1.03 | 2.28 | 0.03801 | 0.31 | 0.32 | 0.28 | SNP        |
| chr6_29911203_A_C   | 29911203 | 1.62 | 1.04 | 2.60 | 0.03801 | 0.14 | 0.16 | 0.11 | SNP        |
| chr6_31778077_G_C   | 31778077 | 0.40 | 0.17 | 0.95 | 0.03806 | 0.02 | 0.01 | 0.03 | SNP        |
| chr6_29913374_C_G   | 29913374 | 1.68 | 1.04 | 2.77 | 0.03815 | 0.15 | 0.15 | 0.14 | SNP        |
| chr6_32797684_A_G   | 32797684 | 0.71 | 0.51 | 0.98 | 0.03817 | 0.32 | 0.30 | 0.38 | SNP        |
| chr6_32635954_G_A   | 32635954 | 1.51 | 1.03 | 2.26 | 0.03820 | 0.22 | 0.24 | 0.20 | SNP        |
| chr6_30920890_G_A   | 30920890 | 1.39 | 1.02 | 1.90 | 0.03832 | 0.41 | 0.43 | 0.37 | SNP        |
| chr6_31239297_G_C   | 31239297 | 0.48 | 0.24 | 0.95 | 0.03836 | 0.04 | 0.03 | 0.06 | SNP        |
| chr6_29913137_A_G   | 29913137 | 1.68 | 1.04 | 2.77 | 0.03841 | 0.15 | 0.15 | 0.14 | SNP        |
| chr6_31325990_C_A   | 31325990 | 1.75 | 1.05 | 3.03 | 0.03849 | 0.09 | 0.10 | 0.06 | SNP        |
| chr6_31326024_T_G   | 31326024 | 1.75 | 1.05 | 3.03 | 0.03849 | 0.09 | 0.10 | 0.06 | SNP        |
| chr6_33052986_T_C   | 33052986 | 1.61 | 1.04 | 2.58 | 0.03853 | 0.10 | 0.11 | 0.07 | SNP        |
| chr6_33053723_T_C   | 33053723 | 1.61 | 1.04 | 2.58 | 0.03853 | 0.10 | 0.11 | 0.07 | SNP        |
| chr6_33053728_C_T   | 33053728 | 1.61 | 1.04 | 2.58 | 0.03853 | 0.10 | 0.11 | 0.07 | SNP        |
| chr6_29911684_A_T   | 29911684 | 1.52 | 1.03 | 2.29 | 0.03861 | 0.20 | 0.20 | 0.18 | SNP        |
| chr6_31239776_A_C   | 31239776 | 1.45 | 1.02 | 2.08 | 0.03871 | 0.29 | 0.30 | 0.25 | SNP        |
| chr6_32339647_C_G   | 32339647 | 0.69 | 0.49 | 0.98 | 0.03881 | 0.21 | 0.19 | 0.26 | SNP        |
| chr6_33267652_C_G   | 33267652 | 0.46 | 0.24 | 1.15 | 0.03894 | 0.46 | 0.48 | 0.43 | SNP        |
| chr6_32627818_C_A   | 32627818 | 1.45 | 1.02 | 2.07 | 0.03913 | 0.28 | 0.30 | 0.25 | SNP        |
| chr6_32629650_T_C   | 32629650 | 0.59 | 0.35 | 0.98 | 0.03922 | 0.17 | 0.15 | 0.21 | SNP        |
| chr6_32632753_C_T   | 32632753 | 0.55 | 0.31 | 0.97 | 0.03935 | 0.19 | 0.18 | 0.22 | SNP        |
| chr6_31324750_A_G   | 31324750 | 1.87 | 1.05 | 3.49 | 0.03977 | 0.08 | 0.09 | 0.06 | SNP        |
| chr6_31127037_C_T   | 31127037 | 0.50 | 0.26 | 0.97 | 0.03998 | 0.03 | 0.02 | 0.05 | SNP        |
| xHLA_2field_C_01_01 | 31236526 | 0.52 | 0.27 | 0.97 | 0.04004 | 0.04 | 0.03 | 0.06 | HLA (xHLA) |
| chr6_31367989_C_A   | 31367989 | 1.67 | 1.04 | 2.78 | 0.04006 | 0.11 | 0.12 | 0.08 | SNP        |
| chr6_32190390_T_G   | 32190390 | 0.69 | 0.48 | 0.98 | 0.04024 | 0.40 | 0.38 | 0.45 | SNP        |
| chr6_33053902_A_G   | 33053902 | 1.61 | 1.04 | 2.59 | 0.04050 | 0.10 | 0.11 | 0.07 | SNP        |
| chr6_33053905_C_T   | 33053905 | 1.61 | 1.04 | 2.59 | 0.04050 | 0.10 | 0.11 | 0.07 | SNP        |
| chr6_31241311_A_G   | 31241311 | 2.01 | 1.05 | 3.98 | 0.04058 | 0.15 | 0.15 | 0.15 | SNP        |
| chr6_32917544_C_T   | 32917544 | 0.64 | 0.42 | 0.98 | 0.04059 | 0.09 | 0.08 | 0.12 | SNP        |
| chr6_32634584_C_G   | 32634584 | 0.58 | 0.35 | 0.98 | 0.04069 | 0.17 | 0.15 | 0.21 | SNP        |
| chr6_33045147_A_T   | 33045147 | 1.41 | 1.02 | 1.98 | 0.04081 | 0.22 | 0.22 | 0.18 | SNP        |
| chr6_31383824_G_A   | 31383824 | 0.49 | 0.24 | 0.98 | 0.04098 | 0.03 | 0.03 | 0.04 | SNP        |
| chr6_29909071_G_C   | 29909071 | 1.52 | 1.02 | 2.28 | 0.04102 | 0.19 | 0.20 | 0.18 | SNP        |
| chr6_29909797_C_T   | 29909797 | 1.52 | 1.02 | 2.28 | 0.04102 | 0.19 | 0.20 | 0.18 | SNP        |
| chr6_32629066_T_C   | 32629066 | 1.44 | 1.02 | 2.05 | 0.04108 | 0.32 | 0.33 | 0.29 | SNP        |
| chr6_33054400_T_C   | 33054400 | 1.61 | 1.03 | 2.58 | 0.04115 | 0.10 | 0.11 | 0.07 | SNP        |
| chr6_33054404_A_G   | 33054404 | 1.61 | 1.03 | 2.58 | 0.04115 | 0.10 | 0.11 | 0.07 | SNP        |
| chr6_33054410_A_G   | 33054410 | 1.61 | 1.03 | 2.58 | 0.04115 | 0.10 | 0.11 | 0.07 | SNP        |
| chr6_30887311_C_T   | 30887311 | 1.42 | 1.02 | 2.00 | 0.04123 | 0.40 | 0.43 | 0.35 | SNP        |
| chr6_29858840_A_C   | 29858840 | 1.60 | 1.03 | 2.54 | 0.04138 | 0.16 | 0.17 | 0.15 | SNP        |
| chr6_31380449_C_T   | 31380449 | 1.46 | 1.02 | 2.10 | 0.04156 | 0.33 | 0.34 | 0.30 | SNP        |
| chr6_31245061_G_T   | 31245061 | 0.70 | 0.50 | 0.99 | 0.04160 | 0.16 | 0.15 | 0.20 | SNP        |
| chr6_32608478_T_C   | 32608478 | 1.52 | 1.02 | 2.30 | 0.04162 | 0.30 | 0.32 | 0.27 | SNP        |
| chr6_32629398_G_C   | 32629398 | 1.43 | 1.02 | 2.01 | 0.04171 | 0.33 | 0.35 | 0.30 | SNP        |
| chr6_30857988_T_C   | 30857988 | 0.69 | 0.48 | 0.99 | 0.04173 | 0.14 | 0.13 | 0.18 | SNP        |
| chr6_32634467_C_T   | 32634467 | 0.58 | 0.35 | 0.98 | 0.04184 | 0.17 | 0.15 | 0.21 | SNP        |
| chr6_32605132_C_T   | 32605132 | 1.49 | 1.02 | 2.20 | 0.04231 | 0.36 | 0.38 | 0.33 | SNP        |
| chr6_32633959_T_C   | 32633959 | 1.42 | 1.01 | 2.00 | 0.04266 | 0.33 | 0.34 | 0.30 | SNP        |
| chr6_29768705_C_A   | 29768705 | 0.71 | 0.51 | 0.99 | 0.04269 | 0.25 | 0.23 | 0.28 | SNP        |
| chr6_31380387_G_A   | 31380387 | 1.65 | 1.03 | 2.71 | 0.04279 | 0.10 | 0.11 | 0.08 | SNP        |
| chr6_33053167_A_C   | 33053167 | 1.59 | 1.03 | 2.54 | 0.04285 | 0.10 | 0.11 | 0.08 | SNP        |
| chr6_31244154_A_C   | 31244154 | 0.52 | 0.28 | 0.98 | 0.04298 | 0.04 | 0.03 | 0.06 | SNP        |
| chr6_33053477_T_G   | 33053477 | 1.63 | 1.04 | 2.68 | 0.04301 | 0.09 | 0.10 | 0.07 | SNP        |
| chr6_32559673_T_G   | 32559673 | 1.43 | 1.01 | 2.04 | 0.04313 | 0.38 | 0.40 | 0.35 | SNP        |
| chr6_32636217_G_A   | 32636217 | 1.42 | 1.01 | 2.01 | 0.04348 | 0.32 | 0.34 | 0.29 | SNP        |
| chr6_30865725_C_T   | 30865725 | 0.68 | 0.46 | 0.99 | 0.04380 | 0.13 | 0.11 | 0.17 | SNP        |
| chr6_32413107_G_T   | 32413107 | 0.60 | 0.36 | 0.99 | 0.04422 | 0.17 | 0.15 | 0.21 | SNP        |
| chr6_32412565_G_A   | 32412565 | 0.60 | 0.36 | 0.99 | 0.04422 | 0.17 | 0.15 | 0.21 | SNP        |
| chr6_32412592_G_A   | 32412592 | 0.60 | 0.36 | 0.99 | 0.04422 | 0.17 | 0.15 | 0.21 | SNP        |
| chr6_32412809_T_A   | 32412809 | 0.60 | 0.36 | 0.99 | 0.04422 | 0.17 | 0.15 | 0.21 | SNP        |
| chr6_33050279_A_G   | 33050279 | 1.57 | 1.03 | 2.50 | 0.04424 | 0.10 | 0.11 | 0.08 | SNP        |
| chr6_32610947_A_C   | 32610947 | 0.46 | 0.22 | 0.99 | 0.04427 | 0.03 | 0.02 | 0.04 | SNP        |
| chr6_32629403_C_T   | 32629403 | 0.49 | 0.21 | 1.01 | 0.04439 | 0.23 | 0.24 | 0.20 | SNP        |
| chr6_32604221_A_G   | 32604221 | 0.46 | 0.22 | 0.98 | 0.04445 | 0.12 | 0.11 | 0.16 | SNP        |
| chr6_30887344_T_C   | 30887344 | 1.40 | 1.01 | 1.94 | 0.04450 | 0.41 | 0.43 | 0.36 | SNP        |
| chr6_29892207_G_T   | 29892207 | 0.55 | 0.30 | 0.98 | 0.04493 | 0.04 | 0.03 | 0.06 | SNP        |
| xHLA_2field_A_01_01 | 29910309 | 1.74 | 1.02 | 3.02 | 0.04499 | 0.15 | 0.15 | 0.14 | HLA (xHLA) |
| chr6_32442703_G_A   | 32442703 | 0.43 | 0.19 | 0.99 | 0.04554 | 0.02 | 0.02 | 0.03 | SNP        |
| chr6_29913639_A_G   | 29913639 | 1.50 | 1.01 | 2.26 | 0.04593 | 0.19 | 0.20 | 0.18 | SNP        |
| chr6_30858247_C_G   | 30858247 | 0.68 | 0.47 | 1.00 | 0.04599 | 0.14 | 0.12 | 0.17 | SNP        |
| chr6_30858254_T_C   | 30858254 | 0.68 | 0.47 | 1.00 | 0.04599 | 0.14 | 0.12 | 0.17 | SNP        |
| chr6_29944577_A_G   | 29944577 | 0.47 | 0.22 | 0.99 | 0.04630 | 0.03 | 0.02 | 0.05 | SNP        |
| chr6_32605609_G_A   | 32605609 | 1.50 | 1.01 | 2.25 | 0.04652 | 0.31 | 0.32 | 0.28 | SNP        |
| chr6_31378335_G_C   | 31378335 | 0.65 | 0.43 | 1.00 | 0.04664 | 0.13 | 0.12 | 0.14 | SNP        |
| chr6_32629330_C_T   | 32629330 | 1.43 | 1.01 | 2.04 | 0.04665 | 0.31 | 0.33 | 0.29 | SNP        |
| chr6_32634139_C_T   | 32634139 | 1.42 | 1.01 | 2.01 | 0.04679 | 0.33 | 0.34 | 0.30 | SNP        |
| chr6_30865204_A_C   | 30865204 | 0.67 | 0.45 | 1.00 | 0.04680 | 0.12 | 0.10 | 0.16 | SNP        |
| chr6_29896108_A_T   | 29896108 | 1.58 | 1.02 | 2.51 | 0.04709 | 0.17 | 0.18 | 0.16 | SNP        |
| chr6_31851469_A_A   | 31851469 | 1.46 | 1.01 | 2.13 | 0.04711 | 0.38 | 0.40 | 0.34 | SNP        |
| chr6_30852747_C_T   | 30852747 | 0.69 | 0.48 | 1.00 | 0.04716 | 0.14 | 0.13 | 0.18 | SNP        |
| chr6_32299908_G_C   | 32299908 | 1.49 | 1.01 | 2.25 | 0.04723 | 0.14 | 0.16 | 0.11 | SNP        |
| chr6_31538497_T_A   | 31538497 | 0.72 | 0.52 | 0.99 | 0.04726 | 0.37 | 0.36 | 0.40 | SNP        |
| chr6_31323416_G_C   | 31323416 | 2.24 | 1.02 | 5.05 | 0.04737 | 0.13 | 0.13 | 0.14 | SNP        |
| chr6_32627812_C_G   | 32627812 | 0.60 | 0.36 | 1.00 | 0.04742 | 0.17 | 0.15 | 0.21 | SNP        |
| chr6_32605555_T_A   | 32605555 | 1.50 | 1.01 | 2.24 | 0.04745 | 0.31 | 0.32 | 0.28 | SNP        |
| chr6_29910286_T_C   | 29910286 | 0.69 | 0.48 | 1.00 | 0.04745 | 0.19 | 0.18 | 0.22 | SNP        |
| chr6_31326157_C_G   | 31326157 | 0.40 | 0.16 | 1.00 | 0.04750 | 0.02 | 0.01 | 0.03 | SNP        |
| chr6_32170433_C_T   | 32170433 | 0.74 | 0.55 | 1.00 | 0.04751 | 0.49 | 0.46 | 0.54 | SNP        |
| chr6_33050148_T_C   | 33050148 | 1.62 | 1.02 | 2.67 | 0.04753 | 0.09 | 0.10 | 0.07 | SNP        |
| xHLA_2field_C_02_02 | 31236526 | 0.53 | 0.28 | 1.00 | 0.04770 | 0.04 | 0.03 | 0.05 | HLA (xHLA) |
| chr6_31349805_A_C   | 31349805 | 0.71 | 0.50 | 1.00 | 0.04772 | 0.30 | 0.29 | 0.32 | SNP        |
| chr6_32628960_T_C   | 32628960 | 0.59 | 0.35 | 1.00 | 0.04775 | 0.18 | 0.16 | 0.21 | SNP        |
| chr6_29896967_C_T   | 29896967 | 1.51 | 1.01 | 2.29 | 0.04794 | 0.20 | 0.21 | 0.19 | SNP        |
| chr6_33050024_C_A   | 33050024 | 1.57 | 1.02 | 2.51 | 0.04797 | 0.10 | 0.11 | 0.08 | SNP        |
| chr6_33050045_T_C   | 33050045 | 1.57 | 1.02 | 2.51 | 0.04797 | 0.10 | 0.11 | 0.08 | SNP        |
| chr6_32298484_G_T   | 32298484 | 0.66 | 0.43 | 1.00 | 0.04812 | 0.22 | 0.20 | 0.27 | SNP        |
| chr6_32501311_C_T   | 32501311 | 0.72 | 0.52 | 1.00 | 0.04828 | 0.30 | 0.28 | 0.35 | SNP        |
| chr6_29909021_C_G   | 29909021 | 1.64 | 1.01 | 2.70 | 0.04833 | 0.15 | 0.15 | 0.14 | SNP        |
| chr6_33053468_G_T   | 33053468 | 1.62 | 1.02 | 2.65 | 0.04835 | 0.09 | 0.10 | 0.07 | SNP        |
| chr6_32501459_T_C   | 32501459 | 0.72 | 0.52 | 1.00 | 0.04876 | 0.30 | 0.28 | 0.35 | SNP        |
| chr6_31466860_G_A   | 31466860 | 0.63 | 0.40 | 1.00 | 0.04892 | 0.09 | 0.07 | 0.11 |            |
